# Supplementary material
Source: publisher site journal article supplement (https://www.spandidos-publications.com/640/downloadSupplementary)
Supplement: Supplementary file 1 [file downloadSupplementary]

**Table SI. Signalment and WHO clinical stage of the 17 dogs with oral malignant melanoma.**

| COM tissue specimens for NGSand qPCR | | | | | |
| --- | --- | --- | --- | --- | --- |
| No | Age (years) | Sex | Breed | WHO Stage | NGS or qPCR |
| T1 | 12.7 | Male | Miniature | Ⅳ | NGS and qPCR |
| T2 | 14.8 | Male | Mongrel | Ⅳ | NGS and qPCR |
| T3 | 10 | Male | Golden  retriever | Ⅳ | NGS and qPCR |
| T4 | 10.11 | Male | Miniature | Ⅰ | qPCR |
| T5 | 7.11 | Male | Miniature | Ⅰ | qPCR |
| T6 | 10.9 | Male | Miniature | Ⅳ | qPCR |
| T7 | 12 | Male | Shiba | Ⅳ | qPCR |
| T8 | 13 | Male | Pomerania | Ⅰ | qPCR |
| T9 | 10.3 | Male | Yorkshire | Ⅳ | qPCR |
| T10 | 10.2 | Male | Chiwawa | Ⅳ | NGS and qPCR |
| T11 | 12.4 | Female | Miniature | Ⅳ | qPCR |
| T12 | 14.6 | Female | Miniature | Ⅱ | qPCR |
| T13 | 15.2 | Female | Mongrel | Ⅳ | NGS and qPCR |
| T14 | 12.11 | Male | Miniature | Ⅳ | NGS and qPCR |
| T15 | 12.4 | Male | Shiba and  miniature cross | Ⅳ | NGS and qPCR |
| T16 | 15.2 | Female | Mongrel | Ⅳ | NGS and qPCR |
| T17 | 10.8 | Male | Miniature | Ⅳ | qPCR |

COM, canine oral melanoma; NGS, next generation sequencing; qPCR, quantitative PCR;

WHO, world health organization.

| **Table SII. Top 20 expressed genes in the control and melanoma.** | | | | | | |
| --- | --- | --- | --- | --- | --- | --- |
| **Normal (healthy control) - top 20 expressed genes** | | | | | | |
| Name | Chr. No | Region | Identifier | RPKM | RE% | Rank |
| KRT13 | 9 | 21261383..21265502 | ENSCAFG00000023449 | 19890.2361 | 5.43095 | 1 |
| MT-ATP6 | MT | 7964..8644 | ENSCAFG00000022729 | 8786.4994 | 2.39912 | 2 |
| MT-CO1 | MT | 5349..6893 | ENSCAFG00000022723 | 7944.76051 | 2.16928 | 3 |
| KRT71 | 27 | 2289973..2545103 | ENSCAFG00000007233 | 7541.68833 | 2.05923 | 4 |
| COX3 | MT | 8644..9427 | ENSCAFG00000022730 | 7229.27704 | 1.97392 | 5 |
| ENSCAFG00000023728 | 17 | 61715810..61716667 | ENSCAFG00000023728 | 6965.1768 | 1.90181 | 6 |
| MT-CO2 | MT | 7034..7717 | ENSCAFG00000022726 | 6290.5654 | 1.71761 | 7 |
| S100A8 | 7 | 43540667..43541864 | ENSCAFG00000017557 | 5616.15702 | 1.53347 | 8 |
| ENSCAFG00000029470 | 7 | Complement (43565980..43569673) | ENSCAFG00000029470 | 4441.53065 | 1.21274 | 9 |
| MT-ATP8 | MT | 7803..8006 | ENSCAFG00000022728 | 3456.0191 | 0.94365 | 10 |
| ND4 | MT | 10201..11578 | ENSCAFG00000022735 | 2864.80131 | 0.78222 | 11 |
| RPL13A | 1 | Complement (107010694..107014169) | ENSCAFG00000029892 | 2271.34387 | 0.62018 | 12 |
| KRT15 | 9 | 21249887..21254131 | ENSCAFG00000023529 | 1949.26113 | 0.53224 | 13 |
| MT-ND1 | MT | 2747..3703 | ENSCAFG00000022713 | 1874.1061 | 0.51172 | 14 |
| RPL17 | 7 | 79264740..79268083 | ENSCAFG00000019044 | 1831.89455 | 0.50019 | 15 |
| TPT1 | 22 | 5711210..5714899 | ENSCAFG00000004533 | 1780.72188 | 0.48622 | 16 |
| RPS6 | 11 | Complement (39161422..39165148) | ENSCAFG00000001615 | 1763.05161 | 0.48139 | 17 |
| S100A6 | 7 | 43502396..43502997 | ENSCAFG00000017553 | 1728.78217 | 0.47204 | 18 |
| ENSCAFG00000018586 | 4 | 67701614..67703002 | ENSCAFG00000018586 | 1576.83413 | 0.43055 | 19 |
| MT-CYB | MT | 14183..15322 | ENSCAFG00000022742 | 1563.5178 | 0.42691 | 20 |
| **Melanoma- top 20 expressed genes** | | | | | | |
| **Name** | **Chr. No** | **Region** | **Identifier** | **RPKM** | **RE%** | **Rank** |
| MT-ATP6 | MT | 7964..8644 | ENSCAFG00000022729 | 6066.67774 | 1.76435 | 1 |
| COX3 | MT | 8644..9427 | ENSCAFG00000022730 | 5040.20294 | 1.46582 | 2 |
| MT-CO2 | MT | 7034..7717 | ENSCAFG00000022726 | 4804.66925 | 1.39733 | 3 |
| MT-CO1 | MT | 5349..6893 | ENSCAFG00000022723 | 4564.04515 | 1.32735 | 4 |
| MT-ATP8 | MT | 7803..8006 | ENSCAFG00000022728 | 2274.78453 | 0.66157 | 5 |
| COL1A1 | 9 | Complement (26183852..26199927) | ENSCAFG00000017018 | 1955.6742 | 0.56876 | 6 |
| ND4 | MT | 10201..11578 | ENSCAFG00000022735 | 1932.22042 | 0.56194 | 7 |
| GAPDH | 27 | Complement (38468919..38472375) | ENSCAFG00000015077 | 1760.063 | 0.51187 | 8 |
| SPARC | 4 | 57659350..57680981 | ENSCAFG00000017855 | 1592.01338 | 0.463 | 9 |
| VIM | 2 | Complement (19670545..19679493) | ENSCAFG00000004529 | 1540.70219 | 0.44808 | 10 |
| TPT1 | 22 | 5711210..5714899 | ENSCAFG00000004533 | 1448.55914 | 0.42128 | 11 |
| ACTG1 | 9 | 635976..637805 | ENSCAFG00000005734 | 1374.25346 | 0.39967 | 12 |
| FTH1_1 | 11 | 39037349..39038170 | ENSCAFG00000030465 | 1298.52499 | 0.37765 | 13 |
| MT-ND1 | MT | 2747..3703 | ENSCAFG00000022713 | 1280.29762 | 0.37234 | 14 |
| APOE | 1 | Complement (110525865..110527644) | ENSCAFG00000004617 | 1241.31668 | 0.36101 | 15 |
| B2M | 30 | 11331778..11337987 | ENSCAFG00000013633 | 1095.02626 | 0.31846 | 16 |
| RPL13A | 1 | Complement (107010694..107014169) | ENSCAFG00000029892 | 1074.56403 | 0.31251 | 17 |
| RPL8 | 13 | 38101882..38104785 | ENSCAFG00000001677 | 1072.15928 | 0.31181 | 18 |
| COL1A2 | 14 | 19883733..19920718 | ENSCAFG00000002069 | 1065.72002 | 0.30994 | 19 |
| DCT | 22 | Complement (45271735..45305188) | ENSCAFG00000005323 | 1058.98851 | 0.30798 | 20 |

Chr, chromosome; RPKM, reads per kilobase of exon model per million mapped reads; RE, relative expression. Common genes between the group are

indicated by red color.

| **Table SIII. Differentially expressed genes upregulated in canine oral melanoma samples.** | | | | |
| --- | --- | --- | --- | --- |
| Ensembl ID | Name | Max group mean | Log₂ fold change | FDR P-value |
| [ENSCAFG00000017018](http://www.ensembl.org/id/ENSCAFG00000017018) | COL1A1 | 1955.674201 | 2.743369912 | 0.007512479 |
| [ENSCAFG00000017855](http://www.ensembl.org/id/ENSCAFG00000017855) | SPARC | 1592.013379 | 1.958796365 | 0.016826508 |
| [ENSCAFG00000004529](http://www.ensembl.org/id/ENSCAFG00000004529) | VIM | 1540.702187 | 1.631886265 | 0.016651237 |
| [ENSCAFG00000004617](http://www.ensembl.org/id/ENSCAFG00000004617) | APOE | 1241.316678 | 2.692950331 | 4.86287E-05 |
| [ENSCAFG00000005323](http://www.ensembl.org/id/ENSCAFG00000005323) | DCT | 1058.988511 | 6.058782672 | 6.82852E-08 |
| [ENSCAFG00000009421](http://www.ensembl.org/id/ENSCAFG00000009421) | MMP2 | 963.6128865 | 3.647513919 | 8.69211E-08 |
| [ENSCAFG00000000080](http://www.ensembl.org/id/ENSCAFG00000000080) | PMEL | 905.7742293 | 4.560661302 | 9.08377E-06 |
| [ENSCAFG00000008404](http://www.ensembl.org/id/ENSCAFG00000008404) | CLU | 865.9013059 | 4.039318414 | 3.25216E-07 |
| [ENSCAFG00000008640](http://www.ensembl.org/id/ENSCAFG00000008640) | TUBA1B | 776.6521341 | 1.408114499 | 0.045793009 |
| [ENSCAFG00000019189](http://www.ensembl.org/id/ENSCAFG00000019189) | BGN | 750.6354384 | 5.44424503 | 0 |
| [ENSCAFG00000003029](http://www.ensembl.org/id/ENSCAFG00000003029) | CXCL8 | 718.7157383 | 8.318634019 | 0 |
| [ENSCAFG00000023759](http://www.ensembl.org/id/ENSCAFG00000023759) | MT2A | 683.7958737 | 3.070192459 | 1.47539E-05 |
| [ENSCAFG00000015155](http://www.ensembl.org/id/ENSCAFG00000015155) | TIMP1 | 665.4634157 | 4.687783993 | 3.22192E-10 |
| [ENSCAFG00000011555](http://www.ensembl.org/id/ENSCAFG00000011555) | MFGE8 | 631.8193399 | 3.990216714 | 8.00311E-10 |
| [ENSCAFG00000000064](http://www.ensembl.org/id/ENSCAFG00000000064) | CD63 | 630.1398386 | 2.456961741 | 2.00145E-05 |
| [ENSCAFG00000009641](http://www.ensembl.org/id/ENSCAFG00000009641) | PI3 | 625.5995841 | 8.475895656 | 0 |
| [ENSCAFG00000011911](http://www.ensembl.org/id/ENSCAFG00000011911) | COL6A1 | 606.4848666 | 3.17919249 | 2.42688E-06 |
| [ENSCAFG00000012093](http://www.ensembl.org/id/ENSCAFG00000012093) | CTSK | 548.9922577 | 2.783007582 | 1.2458E-05 |
| [ENSCAFG00000010052](http://www.ensembl.org/id/ENSCAFG00000010052) | CTSD | 524.8927441 | 2.166366387 | 0.004261945 |
| [ENSCAFG00000002330](http://www.ensembl.org/id/ENSCAFG00000002330) | IGFBP7 | 516.4895445 | 1.978338641 | 0.007224854 |
| [ENSCAFG00000000803](http://www.ensembl.org/id/ENSCAFG00000000803) | DLA DRA | 468.6603065 | 2.163491036 | 0.003334447 |
| [ENSCAFG00000018101](http://www.ensembl.org/id/ENSCAFG00000018101) | CD74 | 467.923412 | 2.267968839 | 0.001807738 |
| [ENSCAFG00000007934](http://www.ensembl.org/id/ENSCAFG00000007934) | CTSB | 412.8808344 | 1.45249615 | 0.044958861 |
| ENSCAFG00000015081 | ARPC1B | 400.0241605 | 2.479661099 | 0.000477606 |
| [ENSCAFG00000014345](http://www.ensembl.org/id/ENSCAFG00000014345) | FN1 | 399.4506121 | 3.253707329 | 1.64575E-05 |
| [ENSCAFG00000000487](http://www.ensembl.org/id/ENSCAFG00000000487) | DLA88 | 371.4840163 | 1.841475956 | 0.012763496 |
| [ENSCAFG00000005386](http://www.ensembl.org/id/ENSCAFG00000005386) | SERPINH1 | 369.6101971 | 3.603217621 | 2.52296E-09 |
| [ENSCAFG00000001002](http://www.ensembl.org/id/ENSCAFG00000001002) | SMPDL3A | 335.9104413 | 6.23191243 | 0 |
| [ENSCAFG00000000432](http://www.ensembl.org/id/ENSCAFG00000000432) | CCT2 | 334.1435225 | 2.266808986 | 0.029292598 |
| [ENSCAFG00000006062](http://www.ensembl.org/id/ENSCAFG00000006062) | COL4A1 | 329.9859728 | 4.281477862 | 8.61536E-12 |
| [ENSCAFG00000016228](http://www.ensembl.org/id/ENSCAFG00000016228) | SERPINE2 | 315.3763695 | 4.942488022 | 3.92374E-12 |
| [ENSCAFG00000001487](http://www.ensembl.org/id/ENSCAFG00000001487) | LGALS1 | 304.7096361 | 2.822911161 | 3.23121E-06 |
| [ENSCAFG00000018349](http://www.ensembl.org/id/ENSCAFG00000018349) | CCL2 | 302.6210063 | 6.954792344 | 0 |
| [ENSCAFG00000000280](http://www.ensembl.org/id/ENSCAFG00000000280) | CDK4 | 302.5784377 | 2.401717671 | 0.005308271 |
| [ENSCAFG00000028626](http://www.ensembl.org/id/ENSCAFG00000028626) | ckpi | 296.6881427 | 5.249657769 | 4.57847E-07 |
| [ENSCAFG00000017053](http://www.ensembl.org/id/ENSCAFG00000017053) | PPIB | 291.7097408 | 2.633260737 | 9.71839E-05 |
| [ENSCAFG00000015054](http://www.ensembl.org/id/ENSCAFG00000015054) | MMP1 | 282.7593604 | 6.766954348 | 4.18577E-10 |
| [ENSCAFG00000000443](http://www.ensembl.org/id/ENSCAFG00000000443) | TUBB | 276.0708037 | 1.417403208 | 0.02773803 |
| [ENSCAFG00000014076](http://www.ensembl.org/id/ENSCAFG00000014076) | CTSH | 244.0882918 | 2.374310152 | 7.4774E-06 |
| [ENSCAFG00000019533](http://www.ensembl.org/id/ENSCAFG00000019533) | PTGDS | 236.409701 | 2.949195522 | 1.37268E-05 |
| [ENSCAFG00000003403](http://www.ensembl.org/id/ENSCAFG00000003403) | PDIA4 | 223.5251899 | 1.468595591 | 0.021926212 |
| [ENSCAFG00000015041](http://www.ensembl.org/id/ENSCAFG00000015041) | DDOST | 221.7466861 | 1.770414684 | 0.006210132 |
| [ENSCAFG00000011197](http://www.ensembl.org/id/ENSCAFG00000011197) | MMP14 | 218.393975 | 2.420410341 | 5.66219E-05 |
| [ENSCAFG00000011349](http://www.ensembl.org/id/ENSCAFG00000011349) | GSTP1 | 212.7996358 | 1.193545351 | 0.04277258 |
| [ENSCAFG00000000804](http://www.ensembl.org/id/ENSCAFG00000000804) | FBLN1 | 211.7989537 | 2.252791445 | 0.002465373 |
| [ENSCAFG00000007875](http://www.ensembl.org/id/ENSCAFG00000007875) | TMSB10 | 205.612538 | 1.099412915 | 0.029397889 |
| [ENSCAFG00000003821](http://www.ensembl.org/id/ENSCAFG00000003821) | ITGB1 | 200.2094122 | 1.600950166 | 0.038694131 |
| [ENSCAFG00000013918](http://www.ensembl.org/id/ENSCAFG00000013918) | SLC2A3 | 199.6855496 | 5.598058625 | 0 |
| [ENSCAFG00000000806](http://www.ensembl.org/id/ENSCAFG00000000806) | HLA-DRB1 | 197.2516745 | 2.161422498 | 0.003936901 |
| [ENSCAFG00000016522](http://www.ensembl.org/id/ENSCAFG00000016522) | PLOD1 | 193.0883401 | 2.683250247 | 1.24966E-05 |
| [ENSCAFG00000014837](http://www.ensembl.org/id/ENSCAFG00000014837) | COL5A2 | 191.6276974 | 3.137641492 | 5.60604E-07 |
| [ENSCAFG00000016071](http://www.ensembl.org/id/ENSCAFG00000016071) | IGFBP4 | 190.6711384 | 2.126906845 | 0.003349601 |
| [ENSCAFG00000006069](http://www.ensembl.org/id/ENSCAFG00000006069) | COL4A2 | 184.3257696 | 3.912008775 | 7.3277E-11 |
| [ENSCAFG00000014322](http://www.ensembl.org/id/ENSCAFG00000014322) | PCOLCE | 181.7237159 | 2.729574198 | 0.000386565 |
| [ENSCAFG00000002997](http://www.ensembl.org/id/ENSCAFG00000002997) | COL9A2 | 176.5921335 | 5.412189889 | 0 |
| [ENSCAFG00000005537](http://www.ensembl.org/id/ENSCAFG00000005537) | LGALS3BP | 175.5171675 | 2.611756275 | 9.08757E-06 |
| [ENSCAFG00000009135](http://www.ensembl.org/id/ENSCAFG00000009135) | SAA1_2 | 174.8578142 | 9.213325616 | 0 |
| [ENSCAFG00000019848](http://www.ensembl.org/id/ENSCAFG00000019848) | COL5A1 | 172.9630852 | 3.444949899 | 2.34658E-06 |
| [ENSCAFG00000010615](http://www.ensembl.org/id/ENSCAFG00000010615) | H2AFZ | 170.5116685 | 1.187666922 | 0.023297883 |
| [ENSCAFG00000001084](http://www.ensembl.org/id/ENSCAFG00000001084) | CXCL14 | 169.1878391 | 3.824572317 | 6.89832E-05 |
| [ENSCAFG00000008353](http://www.ensembl.org/id/ENSCAFG00000008353) | SFRP2 | 169.0102786 | 5.029292453 | 1.28547E-06 |
| [ENSCAFG00000008704](http://www.ensembl.org/id/ENSCAFG00000008704) | THBS1 | 168.4202543 | 4.831192339 | 1.67156E-14 |
| [ENSCAFG00000011817](http://www.ensembl.org/id/ENSCAFG00000011817) | COL18A1 | 168.3702541 | 2.570847163 | 3.91008E-05 |
| [ENSCAFG00000019521](http://www.ensembl.org/id/ENSCAFG00000019521) | FLNA | 164.9307989 | 1.700842857 | 0.010701306 |
| [ENSCAFG00000013413](http://www.ensembl.org/id/ENSCAFG00000013413) | RHOC | 158.9293851 | 1.946785349 | 2.18242E-05 |
| [ENSCAFG00000000814](http://www.ensembl.org/id/ENSCAFG00000000814) | DLA-DQB1 | 158.164261 | 2.548731411 | 0.000243734 |
| [ENSCAFG00000006138](http://www.ensembl.org/id/ENSCAFG00000006138) | LUM | 157.8047277 | 2.447702418 | 0.000516384 |
| [ENSCAFG00000003850](http://www.ensembl.org/id/ENSCAFG00000003850) | RHOB | 157.6736633 | 2.692110503 | 3.70438E-07 |
| [ENSCAFG00000004043](http://www.ensembl.org/id/ENSCAFG00000004043) | LAMA4 | 157.4221801 | 2.508362558 | 3.79459E-05 |
| [ENSCAFG00000013079](http://www.ensembl.org/id/ENSCAFG00000013079) | OLFML2B | 157.1007958 | 3.629410144 | 6.30811E-08 |
| [ENSCAFG00000007893](http://www.ensembl.org/id/ENSCAFG00000007893) | RBP4 | 156.4145649 | 3.387386094 | 1.92041E-07 |
| [ENSCAFG00000014639](http://www.ensembl.org/id/ENSCAFG00000014639) | C1QC | 156.1114694 | 3.454777342 | 4.19065E-08 |
| [ENSCAFG00000008861](http://www.ensembl.org/id/ENSCAFG00000008861) | CPE | 155.4152847 | 2.005579122 | 0.003744731 |
| [ENSCAFG00000017040](http://www.ensembl.org/id/ENSCAFG00000017040) | FOS | 152.9068624 | 2.49620453 | 0.001570854 |
| [ENSCAFG00000013909](http://www.ensembl.org/id/ENSCAFG00000013909) | SERPINE1 | 150.3106455 | 6.521012952 | 0 |
| [ENSCAFG00000005829](http://www.ensembl.org/id/ENSCAFG00000005829) | IL18BP | 150.1071915 | 4.529494669 | 8.03171E-08 |
| [ENSCAFG00000004895](http://www.ensembl.org/id/ENSCAFG00000004895) | DBI | 149.8891218 | 1.244760536 | 0.037048473 |
| [ENSCAFG00000012663](http://www.ensembl.org/id/ENSCAFG00000012663) | GPC1 | 145.6936239 | 1.808888004 | 0.016413092 |
| [ENSCAFG00000001436](http://www.ensembl.org/id/ENSCAFG00000001436) | SOX10 | 145.4978994 | 4.888647866 | 0 |
| [ENSCAFG00000007838](http://www.ensembl.org/id/ENSCAFG00000007838) | SERPING1 | 142.7993313 | 1.526390595 | 0.043805605 |
| [ENSCAFG00000024189](http://www.ensembl.org/id/ENSCAFG00000024189) | SERPINF1 | 141.9693527 | 1.657777136 | 0.022039642 |
| [ENSCAFG00000015489](http://www.ensembl.org/id/ENSCAFG00000015489) | SCG3 | 140.0662432 | 6.604196598 | 8.66135E-15 |
| [ENSCAFG00000017943](http://www.ensembl.org/id/ENSCAFG00000017943) | ANXA6 | 139.910514 | 1.919657358 | 0.000541934 |
| [ENSCAFG00000009569](http://www.ensembl.org/id/ENSCAFG00000009569) | SPP1 | 135.5664837 | 8.621911023 | 0 |
| [ENSCAFG00000010269](http://www.ensembl.org/id/ENSCAFG00000010269) | MANF | 133.9112393 | 1.540870872 | 0.000888341 |
| [ENSCAFG00000002046](http://www.ensembl.org/id/ENSCAFG00000002046) | GNG11 | 130.5991258 | 1.600185716 | 0.031367694 |
| [ENSCAFG00000001818](http://www.ensembl.org/id/ENSCAFG00000001818) | DNAJA1 | 130.3697437 | 2.144187011 | 5.10611E-06 |
| [ENSCAFG00000005528](http://www.ensembl.org/id/ENSCAFG00000005528) | TIMP2 | 129.9089228 | 1.675335934 | 0.002784393 |
| [ENSCAFG00000004373](http://www.ensembl.org/id/ENSCAFG00000004373) | TYR | 129.4118051 | 4.856363506 | 6.07798E-08 |
| [ENSCAFG00000012226](http://www.ensembl.org/id/ENSCAFG00000012226) | COL6A3 | 127.1364725 | 3.618594769 | 6.25628E-08 |
| [ENSCAFG00000010740](http://www.ensembl.org/id/ENSCAFG00000010740) | GNAI2 | 124.3458474 | 1.346236162 | 0.035738248 |
| [ENSCAFG00000017916](http://www.ensembl.org/id/ENSCAFG00000017916) | SEMA7A | 122.2285749 | 6.330537393 | 0 |
| [ENSCAFG00000016010](http://www.ensembl.org/id/ENSCAFG00000016010) | FSCN1 | 122.0731429 | 3.404420822 | 3.99028E-08 |
| [ENSCAFG00000006073](http://www.ensembl.org/id/ENSCAFG00000006073) | POSTN | 121.7584843 | 5.040198689 | 5.34357E-10 |
| [ENSCAFG00000013860](http://www.ensembl.org/id/ENSCAFG00000013860) | PLOD3 | 121.3977934 | 3.458161311 | 2.75564E-09 |
| [ENSCAFG00000032529](http://www.ensembl.org/id/ENSCAFG00000032529) | COTL1 | 121.1753396 | 2.635994686 | 9.84662E-07 |
| [ENSCAFG00000007143](http://www.ensembl.org/id/ENSCAFG00000007143) | ASAH1 | 118.9280489 | 1.324645155 | 0.031297365 |
| [ENSCAFG00000007689](http://www.ensembl.org/id/ENSCAFG00000007689) | VAMP5 | 117.7932486 | 3.185599882 | 3.50003E-09 |
| [ENSCAFG00000012475](http://www.ensembl.org/id/ENSCAFG00000012475) | PEA15 | 117.6853402 | 1.58107592 | 0.003303724 |
| [ENSCAFG00000015885](http://www.ensembl.org/id/ENSCAFG00000015885) | FKBP10 | 117.2438153 | 4.104844647 | 1.37877E-13 |
| [ENSCAFG00000001640](http://www.ensembl.org/id/ENSCAFG00000001640) | CALU | 116.0346108 | 2.378372762 | 7.91939E-05 |
| [ENSCAFG00000010995](http://www.ensembl.org/id/ENSCAFG00000010995) | LGMN | 115.8330246 | 2.028307004 | 0.001508101 |
| [ENSCAFG00000031290](http://www.ensembl.org/id/ENSCAFG00000031290) | C1QA | 114.637277 | 3.050694661 | 3.78675E-07 |
| [ENSCAFG00000016934](http://www.ensembl.org/id/ENSCAFG00000016934) | NGFR | 113.9526603 | 3.336695482 | 0.009395881 |
| [ENSCAFG00000016363](http://www.ensembl.org/id/ENSCAFG00000016363) | PDPN | 111.7049579 | 2.366674516 | 7.13075E-05 |
| [ENSCAFG00000008467](http://www.ensembl.org/id/ENSCAFG00000008467) | EDIL3 | 111.0295024 | 5.883237274 | 0 |
| [ENSCAFG00000015145](http://www.ensembl.org/id/ENSCAFG00000015145) | USP8 | 110.0424189 | 2.389615212 | 0.019226441 |
| [ENSCAFG00000010999](http://www.ensembl.org/id/ENSCAFG00000010999) | PRKAR1A | 108.6304885 | 1.427401072 | 0.007933887 |
| [ENSCAFG00000019362](http://www.ensembl.org/id/ENSCAFG00000019362) | L1CAM | 108.0680806 | 5.476332277 | 0 |
| [ENSCAFG00000009337](http://www.ensembl.org/id/ENSCAFG00000009337) | TUBB2A | 107.4347715 | 2.953086559 | 1.83651E-07 |
| [ENSCAFG00000013234](http://www.ensembl.org/id/ENSCAFG00000013234) | LAMC1 | 105.8655493 | 1.747844571 | 0.016855373 |
| [ENSCAFG00000014956](http://www.ensembl.org/id/ENSCAFG00000014956) | IFI30 | 105.7821901 | 2.082469886 | 0.00050084 |
| [ENSCAFG00000024645](http://www.ensembl.org/id/ENSCAFG00000024645) | BNIP3 | 104.9089968 | 2.406804287 | 2.22171E-05 |
| [ENSCAFG00000008292](http://www.ensembl.org/id/ENSCAFG00000008292) | HEXB | 104.1047368 | 1.204168719 | 0.047546321 |
| [ENSCAFG00000015300](http://www.ensembl.org/id/ENSCAFG00000015300) | SPPL2A | 103.1571561 | 2.052004837 | 0.04524922 |
| [ENSCAFG00000004555](http://www.ensembl.org/id/ENSCAFG00000004555) | RARRES2 | 102.2937458 | 2.35617996 | 5.76486E-08 |
| [ENSCAFG00000032344](http://www.ensembl.org/id/ENSCAFG00000032344) | C1QB | 102.2823345 | 3.58462842 | 1.20606E-08 |
| [ENSCAFG00000012195](http://www.ensembl.org/id/ENSCAFG00000012195) | LDHB | 102.2628035 | 1.777045176 | 0.000754421 |
| [ENSCAFG00000005688](http://www.ensembl.org/id/ENSCAFG00000005688) | PHLDA1 | 101.9097431 | 2.577261666 | 1.23688E-06 |
| [ENSCAFG00000025057](http://www.ensembl.org/id/ENSCAFG00000025057) | LAMB1 | 100.9972062 | 2.080727505 | 0.001306533 |
| [ENSCAFG00000013817](http://www.ensembl.org/id/ENSCAFG00000013817) | SRGN | 100.6734446 | 4.219880228 | 1.04883E-12 |
| [ENSCAFG00000012215](http://www.ensembl.org/id/ENSCAFG00000012215) | AP1S2 | 100.5604115 | 2.613624903 | 1.95885E-05 |
| [ENSCAFG00000030211](http://www.ensembl.org/id/ENSCAFG00000030211) | SDC4 | 100.46339 | 2.130119799 | 0.000829451 |
| [ENSCAFG00000000812](http://www.ensembl.org/id/ENSCAFG00000000812) | DLA-DQA1 | 100.2221042 | 2.322060576 | 0.001478393 |
| [ENSCAFG00000013162](http://www.ensembl.org/id/ENSCAFG00000013162) | TAGLN | 100.1918359 | 1.900696954 | 0.002951498 |
| [ENSCAFG00000008901](http://www.ensembl.org/id/ENSCAFG00000008901) | BPI | 99.79435668 | 3.272530323 | 4.53476E-08 |
| [ENSCAFG00000012079](http://www.ensembl.org/id/ENSCAFG00000012079) | MCAM | 99.05968997 | 2.104351301 | 0.000294183 |
| [ENSCAFG00000017036](http://www.ensembl.org/id/ENSCAFG00000017036) | LRRC59 | 99.05535542 | 1.598937324 | 0.000271622 |
| [ENSCAFG00000009664](http://www.ensembl.org/id/ENSCAFG00000009664) | MATN4 | 98.99814302 | 7.759292564 | 0 |
| [ENSCAFG00000004524](http://www.ensembl.org/id/ENSCAFG00000004524) | TTYH2 | 98.1256001 | 3.750467968 | 1.39989E-07 |
| [ENSCAFG00000016607](http://www.ensembl.org/id/ENSCAFG00000016607) | MSN | 96.67058956 | 1.351358563 | 0.041751664 |
| [ENSCAFG00000017163](http://www.ensembl.org/id/ENSCAFG00000017163) | PRDX2 | 95.60750523 | 1.271573243 | 0.043129049 |
| [ENSCAFG00000005190](http://www.ensembl.org/id/ENSCAFG00000005190) | SEPT9 | 95.02528376 | 1.916641293 | 0.000211828 |
| [ENSCAFG00000018277](http://www.ensembl.org/id/ENSCAFG00000018277) | CKB | 94.56792305 | 1.37410367 | 0.022987287 |
| [ENSCAFG00000000671](http://www.ensembl.org/id/ENSCAFG00000000671) | SOD2 | 94.26323243 | 1.908832724 | 0.005417596 |
| [ENSCAFG00000014074](http://www.ensembl.org/id/ENSCAFG00000014074) | CRYAB | 94.08804469 | 3.179102912 | 7.76307E-08 |
| [ENSCAFG00000000278](http://www.ensembl.org/id/ENSCAFG00000000278) | TSPAN31 | 93.82745185 | 2.068418172 | 0.028806449 |
| [ENSCAFG00000000874](http://www.ensembl.org/id/ENSCAFG00000000874) | THBS2 | 93.61327381 | 4.130958552 | 2.19174E-06 |
| [ENSCAFG00000012914](http://www.ensembl.org/id/ENSCAFG00000012914) | CLIC4 | 93.11767496 | 2.62569255 | 1.73344E-09 |
| [ENSCAFG00000030105](http://www.ensembl.org/id/ENSCAFG00000030105) | IL33 | 92.78953 | 3.849651348 | 1.25483E-09 |
| [ENSCAFG00000009187](http://www.ensembl.org/id/ENSCAFG00000009187) | LOXL2 | 91.9570526 | 2.244643986 | 0.000397334 |
| [ENSCAFG00000006491](http://www.ensembl.org/id/ENSCAFG00000006491) | ITGA5 | 90.10459815 | 2.009227795 | 0.002621367 |
| [ENSCAFG00000024609](http://www.ensembl.org/id/ENSCAFG00000024609) | CNTN2 | 88.56402628 | 10.43821452 | 1.45226E-13 |
| [ENSCAFG00000007857](http://www.ensembl.org/id/ENSCAFG00000007857) | SCRG1 | 88.33005144 | 8.958358135 | 6.3546E-13 |
| [ENSCAFG00000009184](http://www.ensembl.org/id/ENSCAFG00000009184) | NT5DC2 | 87.71041791 | 2.406718083 | 5.18818E-06 |
| [ENSCAFG00000020166](http://www.ensembl.org/id/ENSCAFG00000020166) | ANGPTL2 | 85.39650189 | 2.614818336 | 1.66849E-05 |
| [ENSCAFG00000024952](http://www.ensembl.org/id/ENSCAFG00000024952) | RNF130 | 84.72873834 | 1.53155243 | 0.001296677 |
| [ENSCAFG00000019985](http://www.ensembl.org/id/ENSCAFG00000019985) | COL11A1 | 83.54422941 | 11.55017046 | 0 |
| [ENSCAFG00000014474](http://www.ensembl.org/id/ENSCAFG00000014474) | IGFBP5 | 82.65166084 | 1.897948716 | 0.009270891 |
| [ENSCAFG00000032469](http://www.ensembl.org/id/ENSCAFG00000032469) | DDIT4 | 82.32021662 | 1.969005921 | 0.003127103 |
| [ENSCAFG00000004387](http://www.ensembl.org/id/ENSCAFG00000004387) | RAB38 | 82.11630684 | 2.014181844 | 0.00538803 |
| [ENSCAFG00000032175](http://www.ensembl.org/id/ENSCAFG00000032175) | LHFPL2 | 80.59662589 | 3.204699123 | 1.68408E-08 |
| [ENSCAFG00000007338](http://www.ensembl.org/id/ENSCAFG00000007338) | NR4A1 | 79.85046485 | 4.187769319 | 2.0592E-08 |
| [ENSCAFG00000005118](http://www.ensembl.org/id/ENSCAFG00000005118) | SEC13 | 79.6645518 | 1.032436777 | 0.049603636 |
| [ENSCAFG00000000958](http://www.ensembl.org/id/ENSCAFG00000000958) | GJA1 | 78.96381957 | 2.74412738 | 4.1066E-07 |
| [ENSCAFG00000002525](http://www.ensembl.org/id/ENSCAFG00000002525) | COL15A1 | 78.72864331 | 2.413419414 | 0.000143195 |
| [ENSCAFG00000000195](http://www.ensembl.org/id/ENSCAFG00000000195) | SHMT2 | 77.9730185 | 2.047596821 | 0.000360554 |
| [ENSCAFG00000005564](http://www.ensembl.org/id/ENSCAFG00000005564) | UCP2 | 77.65351405 | 2.061314459 | 0.00021407 |
| [ENSCAFG00000019676](http://www.ensembl.org/id/ENSCAFG00000019676) | ERRFI1 | 77.31668048 | 3.070821936 | 7.93086E-07 |
| [ENSCAFG00000012556](http://www.ensembl.org/id/ENSCAFG00000012556) | HTRA1 | 77.08695107 | 1.649109221 | 0.018822106 |
| [ENSCAFG00000013369](http://www.ensembl.org/id/ENSCAFG00000013369) | PRDX4 | 76.91451149 | 2.471838943 | 4.53934E-10 |
| [ENSCAFG00000020276](http://www.ensembl.org/id/ENSCAFG00000020276) | CYR61 | 75.49973126 | 2.321685214 | 9.24723E-05 |
| [ENSCAFG00000010080](http://www.ensembl.org/id/ENSCAFG00000010080) | MYO1B | 75.41098084 | 2.890441821 | 0.000115658 |
| [ENSCAFG00000032515](http://www.ensembl.org/id/ENSCAFG00000032515) | ARPP19 | 74.88018934 | 2.139673134 | 0.007464542 |
| [ENSCAFG00000014597](http://www.ensembl.org/id/ENSCAFG00000014597) | ITGAV | 74.58597091 | 1.38770921 | 0.047042128 |
| [ENSCAFG00000008753](http://www.ensembl.org/id/ENSCAFG00000008753) | DPYSL2 | 74.31125023 | 1.542587819 | 0.015258982 |
| [ENSCAFG00000009425](http://www.ensembl.org/id/ENSCAFG00000009425) | SLC39A14 | 73.54362673 | 4.039937502 | 3.5918E-13 |
| [ENSCAFG00000012086](http://www.ensembl.org/id/ENSCAFG00000012086) | CTSS | 72.55925703 | 2.433413296 | 0.000163272 |
| [ENSCAFG00000012285](http://www.ensembl.org/id/ENSCAFG00000012285) | CERS2 | 72.38872004 | 1.296349377 | 0.004360154 |
| [ENSCAFG00000008795](http://www.ensembl.org/id/ENSCAFG00000008795) | FKBP11 | 71.96877203 | 1.664477699 | 0.000229517 |
| [ENSCAFG00000031460](http://www.ensembl.org/id/ENSCAFG00000031460) | ICAM1 | 71.9356367 | 1.993356536 | 0.001995871 |
| [ENSCAFG00000003004](http://www.ensembl.org/id/ENSCAFG00000003004) | PPT1 | 71.35220095 | 1.332230456 | 0.016026376 |
| [ENSCAFG00000015757](http://www.ensembl.org/id/ENSCAFG00000015757) | CNP | 71.21603282 | 3.746742589 | 7.83333E-10 |
| [ENSCAFG00000013762](http://www.ensembl.org/id/ENSCAFG00000013762) | PTGS2 | 70.35080767 | 5.792667258 | 2.75336E-08 |
| [ENSCAFG00000032422](http://www.ensembl.org/id/ENSCAFG00000032422) | RARRES1 | 69.88500888 | 2.095191761 | 0.000519217 |
| [ENSCAFG00000012052](http://www.ensembl.org/id/ENSCAFG00000012052) | IDH2 | 69.53631826 | 2.243448747 | 4.30612E-05 |
| [ENSCAFG00000009334](http://www.ensembl.org/id/ENSCAFG00000009334) | OLFML3 | 69.15584724 | 1.889764412 | 0.013155778 |
| [ENSCAFG00000016926](http://www.ensembl.org/id/ENSCAFG00000016926) | PHB | 68.53242984 | 1.07063166 | 0.048498393 |
| [ENSCAFG00000001938](http://www.ensembl.org/id/ENSCAFG00000001938) | VEGFA | 68.43870653 | 2.122546889 | 0.000407342 |
| [ENSCAFG00000010127](http://www.ensembl.org/id/ENSCAFG00000010127) | SNRPN | 68.38077303 | 1.811198766 | 0.001082699 |
| [ENSCAFG00000000082](http://www.ensembl.org/id/ENSCAFG00000000082) | CDK2 | 68.31867968 | 3.110553056 | 2.1578E-07 |
| [ENSCAFG00000006697](http://www.ensembl.org/id/ENSCAFG00000006697) | TYROBP | 68.3122253 | 3.161221238 | 8.33019E-11 |
| [ENSCAFG00000017820](http://www.ensembl.org/id/ENSCAFG00000017820) | CD276 | 67.93849977 | 3.311142345 | 7.81419E-10 |
| [ENSCAFG00000005306](http://www.ensembl.org/id/ENSCAFG00000005306) | SOCS3 | 67.11431284 | 5.265940518 | 0 |
| [ENSCAFG00000017646](http://www.ensembl.org/id/ENSCAFG00000017646) | SERPINA1 | 66.87881825 | 6.24878167 | 0 |
| [ENSCAFG00000029284](http://www.ensembl.org/id/ENSCAFG00000029284) | SAT1 | 66.2168967 | 1.970233205 | 0.001699891 |
| [ENSCAFG00000003426](http://www.ensembl.org/id/ENSCAFG00000003426) | TNC | 66.02479843 | 6.664087639 | 0 |
| [ENSCAFG00000010530](http://www.ensembl.org/id/ENSCAFG00000010530) | CCDC80 | 65.9548577 | 2.462454745 | 0.003330935 |
| [ENSCAFG00000011247](http://www.ensembl.org/id/ENSCAFG00000011247) | LAPTM5 | 65.7204033 | 2.193108479 | 6.87657E-05 |
| [ENSCAFG00000003615](http://www.ensembl.org/id/ENSCAFG00000003615) | ZYX | 65.53378896 | 1.481609364 | 0.004746267 |
| [ENSCAFG00000000772](http://www.ensembl.org/id/ENSCAFG00000000772) | QKI | 64.89406584 | 1.488278013 | 0.007849541 |
| [ENSCAFG00000007200](http://www.ensembl.org/id/ENSCAFG00000007200) | SLC20A1 | 64.46270637 | 1.350747897 | 0.047819141 |
| [ENSCAFG00000024385](http://www.ensembl.org/id/ENSCAFG00000024385) | ADGRG1 | 64.36907834 | 1.990703587 | 0.008036884 |
| [ENSCAFG00000017811](http://www.ensembl.org/id/ENSCAFG00000017811) | PLP1 | 64.1002786 | 4.445243008 | 0 |
| [ENSCAFG00000010930](http://www.ensembl.org/id/ENSCAFG00000010930) | COL16A1 | 63.97069444 | 3.193443856 | 5.55835E-08 |
| [ENSCAFG00000023338](http://www.ensembl.org/id/ENSCAFG00000023338) | JUND | 63.23815328 | 1.620074157 | 0.006109203 |
| [ENSCAFG00000028568](http://www.ensembl.org/id/ENSCAFG00000028568) | JCHAIN | 63.19107638 | 3.646885147 | 4.25261E-07 |
| [ENSCAFG00000004402](http://www.ensembl.org/id/ENSCAFG00000004402) | PRSS23 | 62.7707209 | 1.337529338 | 0.013040281 |
| [ENSCAFG00000015963](http://www.ensembl.org/id/ENSCAFG00000015963) | FADS3 | 62.68155854 | 2.128715393 | 1.71257E-05 |
| [ENSCAFG00000003276](http://www.ensembl.org/id/ENSCAFG00000003276) | ANTXR1 | 62.54287311 | 2.515843501 | 9.32191E-06 |
| [ENSCAFG00000011742](http://www.ensembl.org/id/ENSCAFG00000011742) | PLEKHO1 | 62.40711781 | 3.058635033 | 1.97453E-12 |
| [ENSCAFG00000023134](http://www.ensembl.org/id/ENSCAFG00000023134) | TNFRSF12A | 62.38516878 | 2.29471916 | 2.00816E-05 |
| [ENSCAFG00000000957](http://www.ensembl.org/id/ENSCAFG00000000957) | SNTB1 | 62.35914793 | 4.411977938 | 9.56756E-10 |
| [ENSCAFG00000015201](http://www.ensembl.org/id/ENSCAFG00000015201) | SNAP29 | 62.10839085 | 1.99706098 | 0.047782432 |
| [ENSCAFG00000002702](http://www.ensembl.org/id/ENSCAFG00000002702) | COL12A1 | 62.00449625 | 4.101168817 | 7.04852E-11 |
| [ENSCAFG00000004491](http://www.ensembl.org/id/ENSCAFG00000004491) | LCP1 | 61.83630301 | 3.025299092 | 2.1452E-08 |
| [ENSCAFG00000029442](http://www.ensembl.org/id/ENSCAFG00000029442) | CTGF | 61.80167974 | 3.690682747 | 1.94439E-12 |
| [ENSCAFG00000006248](http://www.ensembl.org/id/ENSCAFG00000006248) | CHL1 | 61.7892174 | 4.138690745 | 1.54744E-10 |
| [ENSCAFG00000008582](http://www.ensembl.org/id/ENSCAFG00000008582) | VCAN | 61.38997624 | 5.147466675 | 1.64521E-12 |
| [ENSCAFG00000002276](http://www.ensembl.org/id/ENSCAFG00000002276) | ELOVL5 | 61.28180734 | 1.489046176 | 0.001027217 |
| [ENSCAFG00000001875](http://www.ensembl.org/id/ENSCAFG00000001875) | CKAP4 | 60.91485896 | 2.189899469 | 1.33612E-05 |
| [ENSCAFG00000017389](http://www.ensembl.org/id/ENSCAFG00000017389) | RAB13 | 60.20421679 | 1.459089606 | 0.004436482 |
| [ENSCAFG00000017665](http://www.ensembl.org/id/ENSCAFG00000017665) | VMP1 | 59.84217488 | 1.593655292 | 0.00188214 |
| [ENSCAFG00000015902](http://www.ensembl.org/id/ENSCAFG00000015902) | P3H4 | 59.48703587 | 1.765322394 | 0.000630151 |
| [ENSCAFG00000001077](http://www.ensembl.org/id/ENSCAFG00000001077) | TRIB1 | 59.14418329 | 2.108368096 | 9.46116E-05 |
| [ENSCAFG00000015190](http://www.ensembl.org/id/ENSCAFG00000015190) | PLAU | 57.78581222 | 3.454851216 | 1.34081E-08 |
| [ENSCAFG00000020104](http://www.ensembl.org/id/ENSCAFG00000020104) | CNN3 | 57.75377359 | 1.511326435 | 0.005270123 |
| [ENSCAFG00000001711](http://www.ensembl.org/id/ENSCAFG00000001711) | HMOX1 | 57.753717 | 3.857528725 | 8.66135E-15 |
| [ENSCAFG00000016769](http://www.ensembl.org/id/ENSCAFG00000016769) | NES | 57.12356477 | 4.821129461 | 0 |
| [ENSCAFG00000011445](http://www.ensembl.org/id/ENSCAFG00000011445) | B4GALT5 | 57.04809148 | 1.315162942 | 0.012605947 |
| [ENSCAFG00000006502](http://www.ensembl.org/id/ENSCAFG00000006502) | TPP1 | 56.95561935 | 2.045521225 | 3.94516E-05 |
| [ENSCAFG00000028707](http://www.ensembl.org/id/ENSCAFG00000028707) | ITM2C | 56.8223737 | 2.084947089 | 0.00015865 |
| [ENSCAFG00000005906](http://www.ensembl.org/id/ENSCAFG00000005906) | PYCR1 | 56.5875883 | 4.351680632 | 0 |
| [ENSCAFG00000010994](http://www.ensembl.org/id/ENSCAFG00000010994) | PPFIBP1 | 56.55006233 | 1.546785914 | 0.038877099 |
| [ENSCAFG00000003625](http://www.ensembl.org/id/ENSCAFG00000003625) | FCGRT | 56.43974291 | 2.083119498 | 1.23627E-05 |
| [ENSCAFG00000015598](http://www.ensembl.org/id/ENSCAFG00000015598) | DHRS7 | 56.40199511 | 1.164380175 | 0.03117366 |
| [ENSCAFG00000018831](http://www.ensembl.org/id/ENSCAFG00000018831) | SLC45A2 | 56.37626489 | 4.375788344 | 9.23994E-10 |
| [ENSCAFG00000009582](http://www.ensembl.org/id/ENSCAFG00000009582) | TXNDC5 | 56.28886882 | 2.061952337 | 0.000335162 |
| [ENSCAFG00000014100](http://www.ensembl.org/id/ENSCAFG00000014100) | SGPL1 | 55.69212931 | 1.422399448 | 0.031911568 |
| [ENSCAFG00000010588](http://www.ensembl.org/id/ENSCAFG00000010588) | MARCKSL1 | 55.4823409 | 4.294400236 | 0 |
| [ENSCAFG00000028621](http://www.ensembl.org/id/ENSCAFG00000028621) | OLFML2A | 54.64207464 | 2.430396185 | 0.025974092 |
| [ENSCAFG00000014773](http://www.ensembl.org/id/ENSCAFG00000014773) | HSPG2 | 54.61802967 | 1.849708113 | 0.008846067 |
| [ENSCAFG00000015002](http://www.ensembl.org/id/ENSCAFG00000015002) | PRRX1 | 54.61560901 | 1.611380098 | 0.02289639 |
| [ENSCAFG00000010274](http://www.ensembl.org/id/ENSCAFG00000010274) | CHI3L1 | 54.53271717 | 7.868381299 | 0 |
| [ENSCAFG00000003620](http://www.ensembl.org/id/ENSCAFG00000003620) | RCN3 | 54.27313104 | 2.646939906 | 1.99866E-06 |
| [ENSCAFG00000012183](http://www.ensembl.org/id/ENSCAFG00000012183) | CTSZ | 54.20877093 | 1.906000009 | 0.000292193 |
| [ENSCAFG00000032120](http://www.ensembl.org/id/ENSCAFG00000032120) | C1QTNF6 | 54.1782614 | 3.300392574 | 3.07323E-05 |
| [ENSCAFG00000000426](http://www.ensembl.org/id/ENSCAFG00000000426) | LYZ | 54.11663195 | 1.728273462 | 0.034733137 |
| [ENSCAFG00000009059](http://www.ensembl.org/id/ENSCAFG00000009059) | COL2A1 | 54.10774133 | 10.36199764 | 0 |
| [ENSCAFG00000009587](http://www.ensembl.org/id/ENSCAFG00000009587) | BMP1 | 53.73505475 | 1.321603312 | 0.025413343 |
| [ENSCAFG00000001878](http://www.ensembl.org/id/ENSCAFG00000001878) | GABRG1 | 53.47784623 | 11.26791351 | 3.86657E-10 |
| [ENSCAFG00000016200](http://www.ensembl.org/id/ENSCAFG00000016200) | TCF12 | 53.36777855 | 2.772142002 | 0.001857629 |
| [ENSCAFG00000006458](http://www.ensembl.org/id/ENSCAFG00000006458) | RASA3 | 53.1008648 | 3.07212173 | 4.1582E-11 |
| [ENSCAFG00000005176](http://www.ensembl.org/id/ENSCAFG00000005176) | SEC14L1 | 52.98021544 | 1.475040207 | 0.012093747 |
| [ENSCAFG00000015095](http://www.ensembl.org/id/ENSCAFG00000015095) | LAP3 | 52.77286005 | 1.106459761 | 0.031938155 |
| [ENSCAFG00000018171](http://www.ensembl.org/id/ENSCAFG00000018171) | CCL5 | 52.22631677 | 2.5112009 | 0.001925682 |
| [ENSCAFG00000000200](http://www.ensembl.org/id/ENSCAFG00000000200) | NDUFA4L2 | 52.10284524 | 2.232877374 | 0.014790212 |
| [ENSCAFG00000024888](http://www.ensembl.org/id/ENSCAFG00000024888) | FOLH1 | 51.9884665 | 3.368918319 | 3.43415E-07 |
| [ENSCAFG00000012878](http://www.ensembl.org/id/ENSCAFG00000012878) | FCER1G | 51.84613675 | 3.101867572 | 6.6723E-08 |
| [ENSCAFG00000004034](http://www.ensembl.org/id/ENSCAFG00000004034) | EMP3 | 51.57629797 | 1.875735327 | 0.000264638 |
| [ENSCAFG00000031738](http://www.ensembl.org/id/ENSCAFG00000031738) | COLGALT1 | 51.4489763 | 1.837517138 | 0.000481572 |
| [ENSCAFG00000028869](http://www.ensembl.org/id/ENSCAFG00000028869) | GPX8 | 51.27593456 | 2.590083389 | 5.83117E-09 |
| [ENSCAFG00000008279](http://www.ensembl.org/id/ENSCAFG00000008279) | PTPRJ | 51.23200423 | 3.458613227 | 1.44824E-08 |
| [ENSCAFG00000004201](http://www.ensembl.org/id/ENSCAFG00000004201) | SLC1A5 | 51.21180475 | 1.194781593 | 0.020143915 |
| [ENSCAFG00000031382](http://www.ensembl.org/id/ENSCAFG00000031382) | PMEPA1 | 50.83130313 | 3.509451804 | 4.22329E-09 |
| [ENSCAFG00000004662](http://www.ensembl.org/id/ENSCAFG00000004662) | EMILIN1 | 50.67571159 | 3.798962457 | 3.43262E-11 |
| [ENSCAFG00000011534](http://www.ensembl.org/id/ENSCAFG00000011534) | ACAN | 50.1107608 | 10.46073103 | 0 |
| [ENSCAFG00000005970](http://www.ensembl.org/id/ENSCAFG00000005970) | FGFR1 | 49.76752226 | 1.425747169 | 0.023040138 |
| [ENSCAFG00000000643](http://www.ensembl.org/id/ENSCAFG00000000643) | AZIN1 | 49.75149083 | 1.17378549 | 0.017379887 |
| [ENSCAFG00000016019](http://www.ensembl.org/id/ENSCAFG00000016019) | FADS2 | 49.69786942 | 3.338763659 | 5.47609E-10 |
| [ENSCAFG00000002040](http://www.ensembl.org/id/ENSCAFG00000002040) | TFPI2 | 49.61346056 | 2.969224474 | 4.95493E-07 |
| [ENSCAFG00000018629](http://www.ensembl.org/id/ENSCAFG00000018629) | WSB1 | 49.55809124 | 1.765583529 | 0.006783059 |
| [ENSCAFG00000002526](http://www.ensembl.org/id/ENSCAFG00000002526) | P3H1 | 49.45627546 | 2.211656915 | 4.3318E-06 |
| [ENSCAFG00000002733](http://www.ensembl.org/id/ENSCAFG00000002733) | IL6 | 49.22546128 | 10.85176402 | 3.55745E-12 |
| [ENSCAFG00000018727](http://www.ensembl.org/id/ENSCAFG00000018727) | RAB31 | 48.99909136 | 2.966436247 | 8.56116E-12 |
| [ENSCAFG00000003296](http://www.ensembl.org/id/ENSCAFG00000003296) | GFPT1 | 48.85542576 | 2.245468221 | 1.9162E-05 |
| [ENSCAFG00000019258](http://www.ensembl.org/id/ENSCAFG00000019258) | VWA1 | 48.76910686 | 3.363804657 | 8.69017E-05 |
| [ENSCAFG00000019081](http://www.ensembl.org/id/ENSCAFG00000019081) | MYO10 | 48.38587697 | 2.658562845 | 8.13507E-06 |
| [ENSCAFG00000008098](http://www.ensembl.org/id/ENSCAFG00000008098) | LRRTM1 | 47.6982437 | 8.665469907 | 1.19868E-08 |
| [ENSCAFG00000010304](http://www.ensembl.org/id/ENSCAFG00000010304) | ETS1 | 47.26744851 | 2.577077503 | 9.00625E-06 |
| [ENSCAFG00000020225](http://www.ensembl.org/id/ENSCAFG00000020225) | NEK6 | 47.1602168 | 2.753347372 | 1.03154E-09 |
| [ENSCAFG00000016799](http://www.ensembl.org/id/ENSCAFG00000016799) | VKORC1 | 47.11408054 | 1.143719729 | 0.044390058 |
| [ENSCAFG00000009533](http://www.ensembl.org/id/ENSCAFG00000009533) | SSR1 | 47.0088471 | 1.221738582 | 0.013682781 |
| [ENSCAFG00000003260](http://www.ensembl.org/id/ENSCAFG00000003260) | PLEK | 46.67881402 | 5.51083778 | 0 |
| [ENSCAFG00000006790](http://www.ensembl.org/id/ENSCAFG00000006790) | STARD7 | 46.43564219 | 1.218696836 | 0.01131234 |
| [ENSCAFG00000007203](http://www.ensembl.org/id/ENSCAFG00000007203) | GGH | 46.35091418 | 1.78981881 | 0.000338137 |
| [ENSCAFG00000016064](http://www.ensembl.org/id/ENSCAFG00000016064) | MAGED1 | 45.90654773 | 1.615415845 | 0.002167599 |
| [ENSCAFG00000011196](http://www.ensembl.org/id/ENSCAFG00000011196) | NID1 | 45.89492783 | 1.950934327 | 0.000190762 |
| [ENSCAFG00000017296](http://www.ensembl.org/id/ENSCAFG00000017296) | RNF145 | 45.82643153 | 1.760192949 | 0.000469558 |
| [ENSCAFG00000010172](http://www.ensembl.org/id/ENSCAFG00000010172) | MX1 | 45.63208619 | 3.502697533 | 5.49462E-07 |
| [ENSCAFG00000030285](http://www.ensembl.org/id/ENSCAFG00000030285) | CDR2L | 45.54382031 | 3.773784533 | 8.76728E-08 |
| [ENSCAFG00000029053](http://www.ensembl.org/id/ENSCAFG00000029053) | TRIB2 | 45.28137572 | 3.422909741 | 4.79008E-11 |
| [ENSCAFG00000010193](http://www.ensembl.org/id/ENSCAFG00000010193) | GUSB | 45.2116921 | 1.507590575 | 0.003657978 |
| [ENSCAFG00000020088](http://www.ensembl.org/id/ENSCAFG00000020088) | LCN2 | 45.12044544 | 6.617216123 | 2.46133E-14 |
| [ENSCAFG00000016307](http://www.ensembl.org/id/ENSCAFG00000016307) | EFHD2 | 44.97212862 | 1.555058041 | 0.01134781 |
| [ENSCAFG00000015800](http://www.ensembl.org/id/ENSCAFG00000015800) | MYO5A | 44.82196981 | 2.606772406 | 0.001653232 |
| [ENSCAFG00000015818](http://www.ensembl.org/id/ENSCAFG00000015818) | ACLY | 44.77891551 | 1.410177212 | 0.02219273 |
| [ENSCAFG00000017455](http://www.ensembl.org/id/ENSCAFG00000017455) | GAS7 | 44.73690435 | 2.957303387 | 6.63722E-08 |
| [ENSCAFG00000020416](http://www.ensembl.org/id/ENSCAFG00000020416) | CMTM3 | 44.42822965 | 2.0868912 | 4.11767E-05 |
| [ENSCAFG00000003228](http://www.ensembl.org/id/ENSCAFG00000003228) | PXDN | 44.40049856 | 2.509245644 | 2.41951E-06 |
| [ENSCAFG00000000868](http://www.ensembl.org/id/ENSCAFG00000000868) | SMOC2 | 44.27447708 | 1.964384455 | 0.004668639 |
| [ENSCAFG00000004615](http://www.ensembl.org/id/ENSCAFG00000004615) | APOC1 | 43.84605416 | 4.837255243 | 2.66953E-08 |
| [ENSCAFG00000017727](http://www.ensembl.org/id/ENSCAFG00000017727) | ADPGK | 43.81174223 | 1.748746521 | 0.001936035 |
| [ENSCAFG00000006100](http://www.ensembl.org/id/ENSCAFG00000006100) | DUSP6 | 43.22575795 | 2.151963671 | 4.74175E-05 |
| [ENSCAFG00000008395](http://www.ensembl.org/id/ENSCAFG00000008395) | SCARA3 | 43.18857731 | 2.027808474 | 0.001185673 |
| [ENSCAFG00000017958](http://www.ensembl.org/id/ENSCAFG00000017958) | COL5A3 | 42.87199645 | 3.455364292 | 7.41705E-09 |
| [ENSCAFG00000003169](http://www.ensembl.org/id/ENSCAFG00000003169) | CALD1 | 42.45582326 | 1.747900304 | 0.005738765 |
| [ENSCAFG00000015221](http://www.ensembl.org/id/ENSCAFG00000015221) | EMC1 | 42.37453964 | 1.318403026 | 0.033998106 |
| [ENSCAFG00000008584](http://www.ensembl.org/id/ENSCAFG00000008584) | CXCL10 | 42.36732554 | 4.208737176 | 5.65343E-05 |
| [ENSCAFG00000015528](http://www.ensembl.org/id/ENSCAFG00000015528) | TMOD2 | 42.13330357 | 2.911893396 | 0.003685368 |
| [ENSCAFG00000015978](http://www.ensembl.org/id/ENSCAFG00000015978) | UGDH | 42.09113454 | 2.418597304 | 9.92223E-08 |
| [ENSCAFG00000002589](http://www.ensembl.org/id/ENSCAFG00000002589) | COL9A1 | 41.98627672 | 9.375337519 | 0 |
| [ENSCAFG00000016534](http://www.ensembl.org/id/ENSCAFG00000016534) | ACTN1 | 41.83892758 | 1.946447149 | 0.001298503 |
| [ENSCAFG00000001217](http://www.ensembl.org/id/ENSCAFG00000001217) | PTK2 | 41.71970792 | 1.749176099 | 0.002215356 |
| [ENSCAFG00000012731](http://www.ensembl.org/id/ENSCAFG00000012731) | COL9A3 | 41.57551242 | 8.411393341 | 0 |
| [ENSCAFG00000017357](http://www.ensembl.org/id/ENSCAFG00000017357) | ADAM19 | 41.39848402 | 3.370665677 | 4.38234E-06 |
| [ENSCAFG00000019627](http://www.ensembl.org/id/ENSCAFG00000019627) | MPP1 | 41.16589036 | 1.089533726 | 0.038896539 |
| [ENSCAFG00000007249](http://www.ensembl.org/id/ENSCAFG00000007249) | IL1B | 40.81758304 | 9.979670367 | 0 |
| [ENSCAFG00000023910](http://www.ensembl.org/id/ENSCAFG00000023910) | LOXL1 | 40.5372711 | 2.099075347 | 2.65114E-06 |
| [ENSCAFG00000008383](http://www.ensembl.org/id/ENSCAFG00000008383) | PFN2 | 40.26467095 | 2.419778489 | 2.80319E-07 |
| [ENSCAFG00000008101](http://www.ensembl.org/id/ENSCAFG00000008101) | PLOD2 | 40.25053779 | 3.158778858 | 1.67449E-07 |
| [ENSCAFG00000029436](http://www.ensembl.org/id/ENSCAFG00000029436) | TMEM167A | 40.18167972 | 1.212889809 | 0.045021768 |
| [ENSCAFG00000002094](http://www.ensembl.org/id/ENSCAFG00000002094) | TMEM165 | 39.89306506 | 1.135954186 | 0.044227354 |
| [ENSCAFG00000025069](http://www.ensembl.org/id/ENSCAFG00000025069) | GABRA2 | 39.86578139 | 3.30175045 | 0.01012166 |
| [ENSCAFG00000000290](http://www.ensembl.org/id/ENSCAFG00000000290) | METTL1 | 39.85516913 | 3.078141702 | 0.001734694 |
| [ENSCAFG00000013481](http://www.ensembl.org/id/ENSCAFG00000013481) | CREB3L2 | 39.73067622 | 2.605776662 | 2.31137E-06 |
| [ENSCAFG00000006794](http://www.ensembl.org/id/ENSCAFG00000006794) | GTF3A | 39.70472425 | 1.101092769 | 0.024306089 |
| [ENSCAFG00000005768](http://www.ensembl.org/id/ENSCAFG00000005768) | FOLR2 | 39.38115943 | 2.59147302 | 1.48538E-05 |
| [ENSCAFG00000003322](http://www.ensembl.org/id/ENSCAFG00000003322) | IFRD1 | 39.08356374 | 1.674816206 | 0.002277601 |
| [ENSCAFG00000009491](http://www.ensembl.org/id/ENSCAFG00000009491) | NRN1 | 38.7967903 | 3.106012624 | 6.44682E-06 |
| [ENSCAFG00000017404](http://www.ensembl.org/id/ENSCAFG00000017404) | SCPEP1 | 38.66112138 | 2.150709988 | 0.000201266 |
| [ENSCAFG00000000310](http://www.ensembl.org/id/ENSCAFG00000000310) | ATP23 | 38.65762103 | 2.81996078 | 0.021475801 |
| [ENSCAFG00000016385](http://www.ensembl.org/id/ENSCAFG00000016385) | ADGRE5 | 38.20759457 | 2.463841165 | 1.35676E-07 |
| [ENSCAFG00000008358](http://www.ensembl.org/id/ENSCAFG00000008358) | LOXL3 | 38.03827663 | 3.751549612 | 9.19657E-12 |
| [ENSCAFG00000009745](http://www.ensembl.org/id/ENSCAFG00000009745) | UBE2C | 37.98722537 | 1.439688112 | 0.019918153 |
| [ENSCAFG00000017869](http://www.ensembl.org/id/ENSCAFG00000017869) | AATF | 37.96768532 | 1.214024418 | 0.017875111 |
| [ENSCAFG00000007649](http://www.ensembl.org/id/ENSCAFG00000007649) | MPEG1 | 37.94113794 | 2.529632748 | 6.0283E-06 |
| [ENSCAFG00000031640](http://www.ensembl.org/id/ENSCAFG00000031640) | GNG2 | 37.92524303 | 3.239258261 | 3.17148E-13 |
| [ENSCAFG00000003422](http://www.ensembl.org/id/ENSCAFG00000003422) | GRB10 | 37.79214046 | 1.089821127 | 0.041343797 |
| [ENSCAFG00000015230](http://www.ensembl.org/id/ENSCAFG00000015230) | TRPM7 | 37.75184925 | 2.605281944 | 0.002813406 |
| [ENSCAFG00000004623](http://www.ensembl.org/id/ENSCAFG00000004623) | SLC4A2 | 37.31534601 | 1.572339833 | 0.008228033 |
| [ENSCAFG00000001354](http://www.ensembl.org/id/ENSCAFG00000001354) | MLANA | 37.29455587 | 3.00830455 | 0.00093195 |
| [ENSCAFG00000003415](http://www.ensembl.org/id/ENSCAFG00000003415) | ODC1 | 37.28050002 | 2.625295333 | 6.13728E-08 |
| [ENSCAFG00000001402](http://www.ensembl.org/id/ENSCAFG00000001402) | KDELR3 | 37.26256003 | 1.460762976 | 0.001857629 |
| [ENSCAFG00000005309](http://www.ensembl.org/id/ENSCAFG00000005309) | LBH | 37.18904376 | 1.535455381 | 0.006602126 |
| [ENSCAFG00000000903](http://www.ensembl.org/id/ENSCAFG00000000903) | COL11A2 | 37.09033707 | 5.910073502 | 2.59492E-12 |
| [ENSCAFG00000017115](http://www.ensembl.org/id/ENSCAFG00000017115) | DNASE2 | 37.00369933 | 1.803507704 | 3.48429E-05 |
| [ENSCAFG00000019349](http://www.ensembl.org/id/ENSCAFG00000019349) | EMC6 | 36.99666924 | 1.18443377 | 0.042369086 |
| [ENSCAFG00000006593](http://www.ensembl.org/id/ENSCAFG00000006593) | CBX5 | 36.97906735 | 1.749413147 | 0.002488769 |
| [ENSCAFG00000013115](http://www.ensembl.org/id/ENSCAFG00000013115) | MELTF | 36.97326022 | 4.720068418 | 1.67085E-13 |
| [ENSCAFG00000008956](http://www.ensembl.org/id/ENSCAFG00000008956) | SPR | 36.92416428 | 2.679664491 | 8.67448E-09 |
| [ENSCAFG00000013269](http://www.ensembl.org/id/ENSCAFG00000013269) | ID3 | 36.92208663 | 2.31005544 | 0.002707679 |
| [ENSCAFG00000012836](http://www.ensembl.org/id/ENSCAFG00000012836) | ADAMTS4 | 36.64656404 | 7.530108375 | 0 |
| [ENSCAFG00000015916](http://www.ensembl.org/id/ENSCAFG00000015916) | RAB27A | 36.61399337 | 2.120360313 | 0.001047469 |
| [ENSCAFG00000010879](http://www.ensembl.org/id/ENSCAFG00000010879) | IGSF11 | 36.5180056 | 4.688153859 | 0 |
| [ENSCAFG00000015318](http://www.ensembl.org/id/ENSCAFG00000015318) | AP4E1 | 36.4848832 | 2.374210904 | 0.022709722 |
| [ENSCAFG00000014972](http://www.ensembl.org/id/ENSCAFG00000014972) | NAGLU | 36.46121639 | 3.66406701 | 3.97453E-11 |
| [ENSCAFG00000003995](http://www.ensembl.org/id/ENSCAFG00000003995) | FYN | 36.36457842 | 2.142389363 | 1.34502E-05 |
| [ENSCAFG00000016486](http://www.ensembl.org/id/ENSCAFG00000016486) | MAGEH1 | 36.32332179 | 1.780411988 | 0.000271174 |
| [ENSCAFG00000016357](http://www.ensembl.org/id/ENSCAFG00000016357) | DBN1 | 36.28453634 | 1.915072352 | 0.000113448 |
| [ENSCAFG00000000074](http://www.ensembl.org/id/ENSCAFG00000000074) | MMP19 | 36.2176133 | 3.349278791 | 2.64116E-11 |
| [ENSCAFG00000005302](http://www.ensembl.org/id/ENSCAFG00000005302) | BIRC5 | 36.07506719 | 1.685674443 | 0.001362467 |
| [ENSCAFG00000016060](http://www.ensembl.org/id/ENSCAFG00000016060) | RARA | 35.874521 | 1.6740731 | 0.000759062 |
| [ENSCAFG00000007482](http://www.ensembl.org/id/ENSCAFG00000007482) | RILPL1 | 35.83246415 | 1.711532984 | 0.00035506 |
| [ENSCAFG00000001290](http://www.ensembl.org/id/ENSCAFG00000001290) | AKR1B1 | 35.69906267 | 2.288407065 | 5.52484E-07 |
| [ENSCAFG00000029098](http://www.ensembl.org/id/ENSCAFG00000029098) | POFUT2 | 35.62924447 | 2.475979544 | 3.67846E-08 |
| [ENSCAFG00000019348](http://www.ensembl.org/id/ENSCAFG00000019348) | ISG15 | 35.38536583 | 2.785163521 | 0.011820498 |
| [ENSCAFG00000013500](http://www.ensembl.org/id/ENSCAFG00000013500) | LTBP3 | 35.35691352 | 1.586477211 | 0.013401707 |
| [ENSCAFG00000009360](http://www.ensembl.org/id/ENSCAFG00000009360) | ANO6 | 34.91517379 | 1.782185356 | 0.000460484 |
| [ENSCAFG00000006801](http://www.ensembl.org/id/ENSCAFG00000006801) | HSPB6 | 34.79734779 | 1.809912737 | 0.003308968 |
| [ENSCAFG00000017704](http://www.ensembl.org/id/ENSCAFG00000017704) | ARMCX3 | 34.71108212 | 2.306659206 | 9.54623E-09 |
| [ENSCAFG00000019515](http://www.ensembl.org/id/ENSCAFG00000019515) | DPP7 | 34.67878616 | 1.157990238 | 0.015258982 |
| [ENSCAFG00000002631](http://www.ensembl.org/id/ENSCAFG00000002631) | RHOQ | 34.35261755 | 1.433792916 | 0.00501941 |
| [ENSCAFG00000015532](http://www.ensembl.org/id/ENSCAFG00000015532) | MYO9B | 34.29282985 | 1.866709059 | 0.00098527 |
| [ENSCAFG00000014290](http://www.ensembl.org/id/ENSCAFG00000014290) | ANKH | 34.14381193 | 2.167774985 | 0.008464066 |
| [ENSCAFG00000008356](http://www.ensembl.org/id/ENSCAFG00000008356) | WWTR1 | 34.10462127 | 1.064863425 | 0.04582199 |
| [ENSCAFG00000002588](http://www.ensembl.org/id/ENSCAFG00000002588) | IL11 | 34.01719097 | 6.282189599 | 4.72058E-10 |
| [ENSCAFG00000003300](http://www.ensembl.org/id/ENSCAFG00000003300) | RNF144A | 33.91721423 | 2.023130259 | 2.60136E-05 |
| [ENSCAFG00000000094](http://www.ensembl.org/id/ENSCAFG00000000094) | LMAN1 | 33.89912913 | 1.832426703 | 2.32737E-05 |
| [ENSCAFG00000017542](http://www.ensembl.org/id/ENSCAFG00000017542) | S100A13 | 33.86788295 | 1.447684898 | 0.026474848 |
| [ENSCAFG00000018381](http://www.ensembl.org/id/ENSCAFG00000018381) | ESM1 | 33.64843512 | 6.654032082 | 0 |
| [ENSCAFG00000025390](http://www.ensembl.org/id/ENSCAFG00000025390) | SLC22A17 | 33.64048004 | 2.208469645 | 1.44067E-07 |
| [ENSCAFG00000023615](http://www.ensembl.org/id/ENSCAFG00000023615) | MMP12 | 33.60884006 | 5.503857052 | 8.66135E-15 |
| [ENSCAFG00000032206](http://www.ensembl.org/id/ENSCAFG00000032206) | OGFRL1 | 33.50906747 | 3.012522274 | 4.84733E-10 |
| [ENSCAFG00000010595](http://www.ensembl.org/id/ENSCAFG00000010595) | RGS2 | 33.45685671 | 4.969950737 | 0 |
| [ENSCAFG00000011916](http://www.ensembl.org/id/ENSCAFG00000011916) | CLIP2 | 33.39330287 | 2.752081097 | 3.81491E-06 |
| [ENSCAFG00000003679](http://www.ensembl.org/id/ENSCAFG00000003679) | C22H16orf87_1 | 33.33399381 | 1.254953266 | 0.048823208 |
| [ENSCAFG00000012294](http://www.ensembl.org/id/ENSCAFG00000012294) | IGFBP3 | 33.31758381 | 3.160978332 | 2.17843E-07 |
| [ENSCAFG00000006530](http://www.ensembl.org/id/ENSCAFG00000006530) | LEPROTL1 | 33.1591066 | 1.467773227 | 0.010436754 |
| [ENSCAFG00000030104](http://www.ensembl.org/id/ENSCAFG00000030104) | EVA1B | 33.13792435 | 1.870997837 | 0.005463392 |
| [ENSCAFG00000011117](http://www.ensembl.org/id/ENSCAFG00000011117) | FABP3 | 33.01447754 | 2.781911152 | 2.45967E-06 |
| [ENSCAFG00000018634](http://www.ensembl.org/id/ENSCAFG00000018634) | TUBB4A | 32.984893 | 5.423221335 | 0 |
| [ENSCAFG00000016090](http://www.ensembl.org/id/ENSCAFG00000016090) | TOP2A | 32.65069614 | 1.91968202 | 0.0005506 |
| [ENSCAFG00000005595](http://www.ensembl.org/id/ENSCAFG00000005595) | FARP1 | 32.63949621 | 3.374673739 | 5.5521E-14 |
| [ENSCAFG00000018077](http://www.ensembl.org/id/ENSCAFG00000018077) | RCN2 | 32.63618992 | 1.477567816 | 0.003919013 |
| [ENSCAFG00000014862](http://www.ensembl.org/id/ENSCAFG00000014862) | SSBP4 | 32.52860413 | 1.452796852 | 0.001790906 |
| [ENSCAFG00000010340](http://www.ensembl.org/id/ENSCAFG00000010340) | PHC2 | 32.49818844 | 1.939182235 | 0.000581158 |
| [ENSCAFG00000016889](http://www.ensembl.org/id/ENSCAFG00000016889) | ARHGEF2 | 32.12647673 | 1.942000791 | 0.000101834 |
| [ENSCAFG00000005497](http://www.ensembl.org/id/ENSCAFG00000005497) | ZEB2 | 32.09296791 | 2.563096271 | 9.31932E-07 |
| [ENSCAFG00000006831](http://www.ensembl.org/id/ENSCAFG00000006831) | SLC15A4 | 31.98067466 | 1.350976941 | 0.010320743 |
| [ENSCAFG00000016333](http://www.ensembl.org/id/ENSCAFG00000016333) | PDLIM7 | 31.90791282 | 1.261904847 | 0.007725847 |
| [ENSCAFG00000016405](http://www.ensembl.org/id/ENSCAFG00000016405) | TMEM132A | 31.89670923 | 2.21723215 | 2.80272E-05 |
| [ENSCAFG00000019342](http://www.ensembl.org/id/ENSCAFG00000019342) | AGRN | 31.80625979 | 2.35190125 | 0.000437655 |
| [ENSCAFG00000031172](http://www.ensembl.org/id/ENSCAFG00000031172) | CADM4 | 31.80246039 | 2.810954453 | 0.001127191 |
| [ENSCAFG00000008871](http://www.ensembl.org/id/ENSCAFG00000008871) | ANTXR2 | 31.75217526 | 1.312934361 | 0.046689006 |
| [ENSCAFG00000004585](http://www.ensembl.org/id/ENSCAFG00000004585) | TMEM176B | 31.74275472 | 4.3080645 | 0 |
| [ENSCAFG00000016145](http://www.ensembl.org/id/ENSCAFG00000016145) | KLHL5 | 31.71580089 | 1.942518718 | 1.39561E-05 |
| [ENSCAFG00000015878](http://www.ensembl.org/id/ENSCAFG00000015878) | UCHL1 | 31.70497382 | 6.080937609 | 0 |
| [ENSCAFG00000005725](http://www.ensembl.org/id/ENSCAFG00000005725) | SLC38A10 | 31.66959316 | 1.27397849 | 0.023975625 |
| [ENSCAFG00000010972](http://www.ensembl.org/id/ENSCAFG00000010972) | TCIRG1 | 31.62045688 | 2.829361236 | 2.09102E-13 |
| [ENSCAFG00000012301](http://www.ensembl.org/id/ENSCAFG00000012301) | TNS3 | 31.6028096 | 2.907181152 | 4.90998E-07 |
| [ENSCAFG00000016261](http://www.ensembl.org/id/ENSCAFG00000016261) | CSF3 | 31.44609402 | 11.15093384 | 0.0001688 |
| [ENSCAFG00000000825](http://www.ensembl.org/id/ENSCAFG00000000825) | SLC30A8 | 31.43939054 | 13.66170873 | 1.5926E-06 |
| [ENSCAFG00000020101](http://www.ensembl.org/id/ENSCAFG00000020101) | ST6GALNAC4 | 31.3591519 | 3.061224459 | 4.18962E-12 |
| [ENSCAFG00000015779](http://www.ensembl.org/id/ENSCAFG00000015779) | PRAF2 | 31.35756398 | 1.899007144 | 1.36495E-05 |
| [ENSCAFG00000007878](http://www.ensembl.org/id/ENSCAFG00000007878) | SLC43A3 | 31.32386702 | 1.806621426 | 0.000199058 |
| [ENSCAFG00000000932](http://www.ensembl.org/id/ENSCAFG00000000932) | SLC35F1 | 31.27766386 | 5.816710967 | 0 |
| [ENSCAFG00000014794](http://www.ensembl.org/id/ENSCAFG00000014794) | SHC4 | 31.18618651 | 4.522196567 | 2.66953E-08 |
| [ENSCAFG00000031381](http://www.ensembl.org/id/ENSCAFG00000031381) | SARAF | 31.15948509 | 1.225180032 | 0.032688156 |
| [ENSCAFG00000002169](http://www.ensembl.org/id/ENSCAFG00000002169) | NFIL3 | 31.11665672 | 2.307714266 | 5.25769E-06 |
| [ENSCAFG00000018219](http://www.ensembl.org/id/ENSCAFG00000018219) | CSF1R | 31.10306429 | 1.801078514 | 0.003156355 |
| [ENSCAFG00000018816](http://www.ensembl.org/id/ENSCAFG00000018816) | RAI14 | 30.95262545 | 2.29777732 | 6.48113E-06 |
| [ENSCAFG00000031326](http://www.ensembl.org/id/ENSCAFG00000031326) | CEBPB | 30.88870803 | 2.41697744 | 5.65548E-06 |
| [ENSCAFG00000014607](http://www.ensembl.org/id/ENSCAFG00000014607) | LRPAP1 | 30.87192335 | 1.908495246 | 0.000148981 |
| [ENSCAFG00000004443](http://www.ensembl.org/id/ENSCAFG00000004443) | FOSB | 30.8117155 | 3.775983832 | 0.000303027 |
| [ENSCAFG00000016967](http://www.ensembl.org/id/ENSCAFG00000016967) | PDK2 | 30.72570722 | 1.435999725 | 0.011437264 |
| [ENSCAFG00000010169](http://www.ensembl.org/id/ENSCAFG00000010169) | FIBIN | 30.5614449 | 1.938840867 | 0.013748995 |
| [ENSCAFG00000019422](http://www.ensembl.org/id/ENSCAFG00000019422) | TNFRSF14 | 30.502053 | 2.580051009 | 7.18264E-06 |
| [ENSCAFG00000008589](http://www.ensembl.org/id/ENSCAFG00000008589) | ART3 | 30.49449802 | 4.143724776 | 0 |
| [ENSCAFG00000016465](http://www.ensembl.org/id/ENSCAFG00000016465) | MAGED2 | 30.40620046 | 1.048822825 | 0.032389527 |
| [ENSCAFG00000013336](http://www.ensembl.org/id/ENSCAFG00000013336) | RXRG | 30.29890657 | 3.699961533 | 6.92464E-06 |
| [ENSCAFG00000003409](http://www.ensembl.org/id/ENSCAFG00000003409) | RRM2 | 30.21726197 | 1.326783458 | 0.01117047 |
| [ENSCAFG00000013957](http://www.ensembl.org/id/ENSCAFG00000013957) | TSPAN15 | 30.21573003 | 3.522505283 | 1.65844E-11 |
| [ENSCAFG00000005187](http://www.ensembl.org/id/ENSCAFG00000005187) | EDNRB | 30.20449326 | 2.659161227 | 0.00011009 |
| [ENSCAFG00000009450](http://www.ensembl.org/id/ENSCAFG00000009450) | BTG2 | 30.15578062 | 2.532189789 | 0.00046496 |
| [ENSCAFG00000002098](http://www.ensembl.org/id/ENSCAFG00000002098) | C2orf40 | 29.99068156 | 6.605345391 | 4.42646E-07 |
| [ENSCAFG00000031938](http://www.ensembl.org/id/ENSCAFG00000031938) | GEM | 29.98151751 | 4.530547767 | 0 |
| [ENSCAFG00000015693](http://www.ensembl.org/id/ENSCAFG00000015693) | NSG1 | 29.97505853 | 2.065590878 | 0.000516908 |
| [ENSCAFG00000015701](http://www.ensembl.org/id/ENSCAFG00000015701) | CYTH3 | 29.95317821 | 1.763943607 | 0.000337942 |
| [ENSCAFG00000013208](http://www.ensembl.org/id/ENSCAFG00000013208) | HDGFL3 | 29.95308253 | 1.778129771 | 0.000239907 |
| [ENSCAFG00000007156](http://www.ensembl.org/id/ENSCAFG00000007156) | DENND5A | 29.90478442 | 1.658881646 | 0.00145636 |
| [ENSCAFG00000005843](http://www.ensembl.org/id/ENSCAFG00000005843) | LTBP1 | 29.89003075 | 2.181744779 | 0.00014684 |
| [ENSCAFG00000005743](http://www.ensembl.org/id/ENSCAFG00000005743) | INPPL1 | 29.55801737 | 1.62323029 | 0.000749834 |
| [ENSCAFG00000015349](http://www.ensembl.org/id/ENSCAFG00000015349) | FNDC3B | 29.53765015 | 2.49723173 | 1.4513E-07 |
| [ENSCAFG00000006496](http://www.ensembl.org/id/ENSCAFG00000006496) | MITF | 29.30625901 | 2.953879371 | 1.77738E-06 |
| [ENSCAFG00000018648](http://www.ensembl.org/id/ENSCAFG00000018648) | OSMR | 29.29047512 | 1.534485479 | 0.005930285 |
| [ENSCAFG00000023309](http://www.ensembl.org/id/ENSCAFG00000023309) | TWF2 | 29.27172178 | 1.767156387 | 0.000141606 |
| [ENSCAFG00000020387](http://www.ensembl.org/id/ENSCAFG00000020387) | ST6GALNAC3 | 29.23087882 | 8.243724801 | 0 |
| [ENSCAFG00000020061](http://www.ensembl.org/id/ENSCAFG00000020061) | CERCAM | 29.13750879 | 1.592033186 | 0.01125551 |
| [ENSCAFG00000011542](http://www.ensembl.org/id/ENSCAFG00000011542) | HAPLN3 | 29.04860624 | 3.030584057 | 6.85784E-10 |
| [ENSCAFG00000029379](http://www.ensembl.org/id/ENSCAFG00000029379) | UBE2S | 29.03804245 | 2.127975048 | 5.52692E-07 |
| [ENSCAFG00000011594](http://www.ensembl.org/id/ENSCAFG00000011594) | RLBP1 | 28.98452562 | 8.71996617 | 0 |
| [ENSCAFG00000018546](http://www.ensembl.org/id/ENSCAFG00000018546) | NNT | 28.84919716 | 2.077073281 | 3.31256E-05 |
| [ENSCAFG00000014573](http://www.ensembl.org/id/ENSCAFG00000014573) | P4HA1 | 28.7589942 | 3.169883998 | 1.30604E-09 |
| [ENSCAFG00000013195](http://www.ensembl.org/id/ENSCAFG00000013195) | EFEMP2 | 28.69520274 | 1.565238038 | 0.006272145 |
| [ENSCAFG00000009336](http://www.ensembl.org/id/ENSCAFG00000009336) | MYBL2 | 28.64286074 | 1.716932753 | 0.000305759 |
| [ENSCAFG00000019419](http://www.ensembl.org/id/ENSCAFG00000019419) | RENBP | 28.61076196 | 1.907972462 | 0.000148597 |
| [ENSCAFG00000017049](http://www.ensembl.org/id/ENSCAFG00000017049) | PANK3 | 28.53587209 | 1.635222061 | 0.000805068 |
| [ENSCAFG00000031631](http://www.ensembl.org/id/ENSCAFG00000031631) | MARCH9 | 28.51764569 | 3.152313441 | 0.000765372 |
| [ENSCAFG00000011992](http://www.ensembl.org/id/ENSCAFG00000011992) | WDR6 | 28.4877104 | 1.439457146 | 0.007498542 |
| [ENSCAFG00000025083](http://www.ensembl.org/id/ENSCAFG00000025083) | FADS1 | 28.41153634 | 4.564978271 | 0 |
| [ENSCAFG00000013968](http://www.ensembl.org/id/ENSCAFG00000013968) | CD163 | 28.37838451 | 2.764430365 | 1.31373E-05 |
| [ENSCAFG00000012119](http://www.ensembl.org/id/ENSCAFG00000012119) | MYLK | 28.29571834 | 2.539294464 | 6.4129E-05 |
| [ENSCAFG00000008565](http://www.ensembl.org/id/ENSCAFG00000008565) | INSC | 28.18181586 | 5.310384396 | 0 |
| [ENSCAFG00000004688](http://www.ensembl.org/id/ENSCAFG00000004688) | PREB | 28.18179912 | 1.03727696 | 0.037073305 |
| [ENSCAFG00000010948](http://www.ensembl.org/id/ENSCAFG00000010948) | PREX1 | 28.10965541 | 3.007309141 | 7.07812E-11 |
| [ENSCAFG00000004613](http://www.ensembl.org/id/ENSCAFG00000004613) | PLXND1 | 27.97630444 | 1.519005037 | 0.013076104 |
| [ENSCAFG00000017035](http://www.ensembl.org/id/ENSCAFG00000017035) | FAM96A | 27.96633357 | 1.618891022 | 0.002206612 |
| [ENSCAFG00000001096](http://www.ensembl.org/id/ENSCAFG00000001096) | ASAP1 | 27.90826538 | 1.279146718 | 0.012213561 |
| [ENSCAFG00000023272](http://www.ensembl.org/id/ENSCAFG00000023272) | FSTL3 | 27.90243148 | 1.684923541 | 0.022309072 |
| [ENSCAFG00000012928](http://www.ensembl.org/id/ENSCAFG00000012928) | LIMD2 | 27.88492846 | 3.302222839 | 7.04684E-08 |
| [ENSCAFG00000014214](http://www.ensembl.org/id/ENSCAFG00000014214) | DNAJA4 | 27.88450895 | 2.85044982 | 9.60487E-08 |
| [ENSCAFG00000000656](http://www.ensembl.org/id/ENSCAFG00000000656) | CTHRC1 | 27.81550354 | 3.283878177 | 3.69432E-10 |
| [ENSCAFG00000006479](http://www.ensembl.org/id/ENSCAFG00000006479) | PKDCC | 27.78835795 | 2.810143989 | 1.57628E-05 |
| [ENSCAFG00000016089](http://www.ensembl.org/id/ENSCAFG00000016089) | PARP1 | 27.63908184 | 1.477299312 | 0.003756515 |
| [ENSCAFG00000018641](http://www.ensembl.org/id/ENSCAFG00000018641) | LGALS9 | 27.51086783 | 1.553039249 | 0.027669594 |
| [ENSCAFG00000014013](http://www.ensembl.org/id/ENSCAFG00000014013) | LIMD1 | 27.47947082 | 3.08705964 | 1.35258E-08 |
| [ENSCAFG00000019980](http://www.ensembl.org/id/ENSCAFG00000019980) | TOR1A | 27.35490818 | 1.123457744 | 0.040558217 |
| [ENSCAFG00000007539](http://www.ensembl.org/id/ENSCAFG00000007539) | ADM | 27.32342032 | 1.896823114 | 0.003800155 |
| [ENSCAFG00000015205](http://www.ensembl.org/id/ENSCAFG00000015205) | SAA1_1 | 27.24627856 | 11.74117065 | 7.84408E-05 |
| [ENSCAFG00000004294](http://www.ensembl.org/id/ENSCAFG00000004294) | POMGNT1 | 27.23363409 | 1.231925923 | 0.017870017 |
| [ENSCAFG00000006538](http://www.ensembl.org/id/ENSCAFG00000006538) | HSPH1 | 27.17904204 | 1.827730157 | 0.000279767 |
| [ENSCAFG00000014951](http://www.ensembl.org/id/ENSCAFG00000014951) | NSD2 | 27.15036133 | 1.294312981 | 0.030397885 |
| [ENSCAFG00000019048](http://www.ensembl.org/id/ENSCAFG00000019048) | SLITRK2 | 27.11646839 | 3.551820026 | 3.39357E-06 |
| [ENSCAFG00000000334](http://www.ensembl.org/id/ENSCAFG00000000334) | ADAMTS2 | 27.06538988 | 2.600708974 | 0.000290895 |
| [ENSCAFG00000016774](http://www.ensembl.org/id/ENSCAFG00000016774) | VPS13C | 27.02954249 | 2.69813354 | 0.006456521 |
| [ENSCAFG00000023594](http://www.ensembl.org/id/ENSCAFG00000023594) | CSRP2 | 27.00320616 | 2.361975366 | 0.001296677 |
| [ENSCAFG00000008586](http://www.ensembl.org/id/ENSCAFG00000008586) | ADAMTS1 | 26.86077875 | 1.836796924 | 0.006803088 |
| [ENSCAFG00000010628](http://www.ensembl.org/id/ENSCAFG00000010628) | SORCS1 | 26.80615162 | 4.813094558 | 0 |
| [ENSCAFG00000019217](http://www.ensembl.org/id/ENSCAFG00000019217) | MFSD12 | 26.76842005 | 1.5487099 | 0.000715487 |
| [ENSCAFG00000018575](http://www.ensembl.org/id/ENSCAFG00000018575) | EPB41L3 | 26.60534983 | 3.090309041 | 4.45941E-07 |
| [ENSCAFG00000003867](http://www.ensembl.org/id/ENSCAFG00000003867) | BAX | 26.53324154 | 1.324513019 | 0.018638989 |
| [ENSCAFG00000007157](http://www.ensembl.org/id/ENSCAFG00000007157) | GRAMD1A | 26.34682208 | 2.089697829 | 1.19975E-06 |
| [ENSCAFG00000031552](http://www.ensembl.org/id/ENSCAFG00000031552) | ERF | 26.30875051 | 1.012705598 | 0.038699369 |
| [ENSCAFG00000030033](http://www.ensembl.org/id/ENSCAFG00000030033) | ERP29 | 26.11325729 | 1.489295823 | 0.000542497 |
| [ENSCAFG00000010579](http://www.ensembl.org/id/ENSCAFG00000010579) | CHSY1 | 26.00790821 | 3.498935818 | 0 |
| [ENSCAFG00000017942](http://www.ensembl.org/id/ENSCAFG00000017942) | MAPRE2 | 25.98927547 | 1.177806737 | 0.011845722 |
| [ENSCAFG00000017521](http://www.ensembl.org/id/ENSCAFG00000017521) | TSPAN6 | 25.91591616 | 1.676879884 | 0.000472617 |
| [ENSCAFG00000012014](http://www.ensembl.org/id/ENSCAFG00000012014) | SH3BP4 | 25.84667092 | 2.387632477 | 8.65004E-07 |
| [ENSCAFG00000011234](http://www.ensembl.org/id/ENSCAFG00000011234) | SDC3 | 25.77519228 | 2.729129181 | 1.84425E-07 |
| [ENSCAFG00000002037](http://www.ensembl.org/id/ENSCAFG00000002037) | PLA2G7 | 25.77011985 | 2.100222657 | 0.000179443 |
| [ENSCAFG00000000848](http://www.ensembl.org/id/ENSCAFG00000000848) | DLA-DMA | 25.75894738 | 2.147381748 | 0.000320246 |
| [ENSCAFG00000003757](http://www.ensembl.org/id/ENSCAFG00000003757) | OSTM1 | 25.72102485 | 1.251251163 | 0.018973726 |
| [ENSCAFG00000011962](http://www.ensembl.org/id/ENSCAFG00000011962) | RFC2 | 25.65586434 | 1.312572035 | 0.039060286 |
| [ENSCAFG00000015854](http://www.ensembl.org/id/ENSCAFG00000015854) | MFAP2 | 25.62839794 | 1.849860646 | 0.00418302 |
| [ENSCAFG00000000437](http://www.ensembl.org/id/ENSCAFG00000000437) | PPP1R18 | 25.62274156 | 1.492143901 | 0.004465183 |
| [ENSCAFG00000007034](http://www.ensembl.org/id/ENSCAFG00000007034) | LYN | 25.60869038 | 2.633546147 | 6.19477E-10 |
| [ENSCAFG00000001450](http://www.ensembl.org/id/ENSCAFG00000001450) | MEST | 25.5764017 | 5.391154902 | 1.55558E-12 |
| [ENSCAFG00000031652](http://www.ensembl.org/id/ENSCAFG00000031652) | SDC2 | 25.55507991 | 1.608391225 | 0.00326515 |
| [ENSCAFG00000008340](http://www.ensembl.org/id/ENSCAFG00000008340) | RACGAP1 | 25.5447032 | 1.369844496 | 0.005872944 |
| [ENSCAFG00000030240](http://www.ensembl.org/id/ENSCAFG00000030240) | DUSP4 | 25.45685187 | 5.007013785 | 0 |
| [ENSCAFG00000012001](http://www.ensembl.org/id/ENSCAFG00000012001) | ARL4C | 25.42355118 | 2.099020443 | 3.03281E-05 |
| [ENSCAFG00000013698](http://www.ensembl.org/id/ENSCAFG00000013698) | ST6GAL1 | 25.37501564 | 2.115672996 | 0.000256539 |
| [ENSCAFG00000008306](http://www.ensembl.org/id/ENSCAFG00000008306) | SMARCD1 | 25.32513919 | 1.112465433 | 0.043856875 |
| [ENSCAFG00000018361](http://www.ensembl.org/id/ENSCAFG00000018361) | TMEM98 | 25.21456719 | 1.873709178 | 0.001421969 |
| [ENSCAFG00000006151](http://www.ensembl.org/id/ENSCAFG00000006151) | CDC42EP3 | 25.17470109 | 1.820313431 | 0.001628401 |
| [ENSCAFG00000002235](http://www.ensembl.org/id/ENSCAFG00000002235) | CHST10 | 25.13720494 | 2.917750003 | 1.29138E-09 |
| [ENSCAFG00000002894](http://www.ensembl.org/id/ENSCAFG00000002894) | AKAP2 | 25.00412795 | 2.0978491 | 4.98209E-05 |
| [ENSCAFG00000018164](http://www.ensembl.org/id/ENSCAFG00000018164) | CCL4 | 24.9750159 | 5.062568088 | 1.71433E-11 |
| [ENSCAFG00000000996](http://www.ensembl.org/id/ENSCAFG00000000996) | FABP7 | 24.94183736 | 7.572979393 | 4.52574E-06 |
| [ENSCAFG00000015154](http://www.ensembl.org/id/ENSCAFG00000015154) | LZTR1 | 24.84347228 | 2.59997981 | 0.002380047 |
| [ENSCAFG00000003162](http://www.ensembl.org/id/ENSCAFG00000003162) | PELI1 | 24.82580074 | 1.194552791 | 0.033054421 |
| [ENSCAFG00000001343](http://www.ensembl.org/id/ENSCAFG00000001343) | FKBP5 | 24.79782901 | 1.588579833 | 0.024731429 |
| [ENSCAFG00000005203](http://www.ensembl.org/id/ENSCAFG00000005203) | TSKU | 24.75240721 | 2.259172026 | 7.18164E-06 |
| [ENSCAFG00000031210](http://www.ensembl.org/id/ENSCAFG00000031210) | OAF | 24.74734786 | 2.787855819 | 2.71975E-08 |
| [ENSCAFG00000023928](http://www.ensembl.org/id/ENSCAFG00000023928) | CCL8 | 24.72356943 | 6.236176168 | 0 |
| [ENSCAFG00000002923](http://www.ensembl.org/id/ENSCAFG00000002923) | CLEC11A | 24.67601956 | 3.641590154 | 1.3932E-10 |
| [ENSCAFG00000003550](http://www.ensembl.org/id/ENSCAFG00000003550) | INHBA | 24.61957437 | 5.735849396 | 0 |
| [ENSCAFG00000014687](http://www.ensembl.org/id/ENSCAFG00000014687) | TMEM59L | 24.55980764 | 4.280564666 | 1.34081E-08 |
| [ENSCAFG00000014891](http://www.ensembl.org/id/ENSCAFG00000014891) | PGPEP1 | 24.53839648 | 2.176276192 | 0.000194058 |
| [ENSCAFG00000013271](http://www.ensembl.org/id/ENSCAFG00000013271) | WIPF1 | 24.41565011 | 2.695983159 | 1.69637E-11 |
| [ENSCAFG00000012986](http://www.ensembl.org/id/ENSCAFG00000012986) | ADAM12 | 24.35623078 | 7.876380279 | 0 |
| [ENSCAFG00000007027](http://www.ensembl.org/id/ENSCAFG00000007027) | FFAR2 | 24.35586759 | 7.672564831 | 0 |
| [ENSCAFG00000015717](http://www.ensembl.org/id/ENSCAFG00000015717) | CH25H | 24.31495281 | 2.753994993 | 1.531E-05 |
| [ENSCAFG00000017110](http://www.ensembl.org/id/ENSCAFG00000017110) | CORO1A | 24.22439363 | 2.236940728 | 7.0258E-06 |
| [ENSCAFG00000008465](http://www.ensembl.org/id/ENSCAFG00000008465) | FMNL3 | 24.15676732 | 2.393475824 | 1.59761E-09 |
| [ENSCAFG00000008265](http://www.ensembl.org/id/ENSCAFG00000008265) | HK2 | 24.14355803 | 1.243583757 | 0.044791951 |
| [ENSCAFG00000000419](http://www.ensembl.org/id/ENSCAFG00000000419) | AKAP12 | 24.07262334 | 1.32820449 | 0.044391038 |
| [ENSCAFG00000014645](http://www.ensembl.org/id/ENSCAFG00000014645) | SLC11A1 | 24.05122675 | 4.53015279 | 0 |
| [ENSCAFG00000020319](http://www.ensembl.org/id/ENSCAFG00000020319) | PRKACB | 24.03772783 | 1.744602698 | 0.004618395 |
| [ENSCAFG00000000433](http://www.ensembl.org/id/ENSCAFG00000000433) | GFPT2 | 24.0375804 | 2.301326142 | 9.97169E-06 |
| [ENSCAFG00000009035](http://www.ensembl.org/id/ENSCAFG00000009035) | PFKM | 23.8524866 | 1.302802391 | 0.034633273 |
| [ENSCAFG00000017271](http://www.ensembl.org/id/ENSCAFG00000017271) | DIS3L | 23.84541449 | 1.159964257 | 0.024107428 |
| [ENSCAFG00000012468](http://www.ensembl.org/id/ENSCAFG00000012468) | OSM | 23.8406286 | 10.59564191 | 4.29127E-12 |
| [ENSCAFG00000015925](http://www.ensembl.org/id/ENSCAFG00000015925) | CCPG1 | 23.82277221 | 1.592293367 | 0.012033623 |
| [ENSCAFG00000009104](http://www.ensembl.org/id/ENSCAFG00000009104) | STC1 | 23.7525038 | 3.768490492 | 1.00655E-13 |
| [ENSCAFG00000031211](http://www.ensembl.org/id/ENSCAFG00000031211) | MANSC1 | 23.74937171 | 1.467935198 | 0.002611594 |
| [ENSCAFG00000013356](http://www.ensembl.org/id/ENSCAFG00000013356) | SLC16A1 | 23.67213578 | 3.053124777 | 1.15392E-13 |
| [ENSCAFG00000030686](http://www.ensembl.org/id/ENSCAFG00000030686) | GLIPR2 | 23.65063546 | 2.559714208 | 7.26071E-09 |
| [ENSCAFG00000032499](http://www.ensembl.org/id/ENSCAFG00000032499) | CRELD1 | 23.58449757 | 1.517188044 | 0.002267855 |
| [ENSCAFG00000016896](http://www.ensembl.org/id/ENSCAFG00000016896) | TGFB1I1 | 23.58339705 | 1.837136843 | 0.000603886 |
| [ENSCAFG00000016422](http://www.ensembl.org/id/ENSCAFG00000016422) | TNFRSF1B | 23.54093881 | 2.624678085 | 3.1934E-07 |
| [ENSCAFG00000018800](http://www.ensembl.org/id/ENSCAFG00000018800) | TRAF4 | 23.52580189 | 2.113640502 | 0.00013339 |
| [ENSCAFG00000004767](http://www.ensembl.org/id/ENSCAFG00000004767) | CAD | 23.33270788 | 1.346054895 | 0.011727353 |
| [ENSCAFG00000012339](http://www.ensembl.org/id/ENSCAFG00000012339) | ATF3 | 23.16123965 | 3.052914431 | 2.9546E-07 |
| [ENSCAFG00000010917](http://www.ensembl.org/id/ENSCAFG00000010917) | ARHGAP31 | 23.15004681 | 1.989558787 | 6.14728E-05 |
| [ENSCAFG00000004914](http://www.ensembl.org/id/ENSCAFG00000004914) | GALK1 | 23.12061967 | 2.238354383 | 4.08622E-05 |
| [ENSCAFG00000018493](http://www.ensembl.org/id/ENSCAFG00000018493) | CD320 | 22.84396144 | 3.198272122 | 9.60386E-08 |
| [ENSCAFG00000016983](http://www.ensembl.org/id/ENSCAFG00000016983) | RAB8B | 22.83186294 | 3.38669599 | 7.08765E-07 |
| [ENSCAFG00000012724](http://www.ensembl.org/id/ENSCAFG00000012724) | EPS8 | 22.74807482 | 2.106910379 | 0.000115313 |
| [ENSCAFG00000002196](http://www.ensembl.org/id/ENSCAFG00000002196) | MCM3 | 22.74719496 | 1.308683681 | 0.006705016 |
| [ENSCAFG00000018625](http://www.ensembl.org/id/ENSCAFG00000018625) | C3 | 22.73761976 | 3.000830724 | 0.005801521 |
| [ENSCAFG00000009287](http://www.ensembl.org/id/ENSCAFG00000009287) | ACVR1 | 22.73683596 | 1.11161363 | 0.049941748 |
| [ENSCAFG00000007673](http://www.ensembl.org/id/ENSCAFG00000007673) | SULF1 | 22.62312356 | 2.589097202 | 1.65694E-05 |
| [ENSCAFG00000015457](http://www.ensembl.org/id/ENSCAFG00000015457) | TSPAN11 | 22.61798676 | 2.98645579 | 9.66216E-06 |
| [ENSCAFG00000013013](http://www.ensembl.org/id/ENSCAFG00000013013) | RNF168 | 22.60755591 | 1.316443181 | 0.00196152 |
| [ENSCAFG00000016392](http://www.ensembl.org/id/ENSCAFG00000016392) | TTYH3 | 22.58844564 | 2.051100202 | 9.10739E-06 |
| [ENSCAFG00000020425](http://www.ensembl.org/id/ENSCAFG00000020425) | CDH11 | 22.57697471 | 2.351091994 | 3.6436E-05 |
| [ENSCAFG00000018167](http://www.ensembl.org/id/ENSCAFG00000018167) | CCL3 | 22.56007944 | 8.502667479 | 8.58513E-11 |
| [ENSCAFG00000005924](http://www.ensembl.org/id/ENSCAFG00000005924) | YIF1B | 22.55477991 | 1.523662055 | 0.00125579 |
| [ENSCAFG00000013011](http://www.ensembl.org/id/ENSCAFG00000013011) | PDE8A | 22.5381226 | 1.123013344 | 0.026942705 |
| [ENSCAFG00000001570](http://www.ensembl.org/id/ENSCAFG00000001570) | PSAT1 | 22.38438353 | 1.472292607 | 0.00521768 |
| [ENSCAFG00000031890](http://www.ensembl.org/id/ENSCAFG00000031890) | HPCAL1 | 22.35469779 | 1.291095577 | 0.010619464 |
| [ENSCAFG00000014650](http://www.ensembl.org/id/ENSCAFG00000014650) | CDCA3 | 22.31343669 | 1.896668097 | 0.002519664 |
| [ENSCAFG00000014435](http://www.ensembl.org/id/ENSCAFG00000014435) | MAOA | 22.28049611 | 1.598950296 | 0.007744559 |
| [ENSCAFG00000005109](http://www.ensembl.org/id/ENSCAFG00000005109) | CXCR4 | 22.27558403 | 3.793069705 | 0 |
| [ENSCAFG00000001133](http://www.ensembl.org/id/ENSCAFG00000001133) | WISP1 | 22.26910846 | 2.849255887 | 0.000623553 |
| [ENSCAFG00000013191](http://www.ensembl.org/id/ENSCAFG00000013191) | NRP2 | 22.22494066 | 2.077017098 | 0.000700643 |
| [ENSCAFG00000005847](http://www.ensembl.org/id/ENSCAFG00000005847) | ADAM9 | 22.1819912 | 1.678573951 | 0.002324555 |
| [ENSCAFG00000017153](http://www.ensembl.org/id/ENSCAFG00000017153) | CITED1 | 22.16334432 | 3.976199417 | 1.58157E-06 |
| [ENSCAFG00000005088](http://www.ensembl.org/id/ENSCAFG00000005088) | CSRNP1 | 22.06565352 | 1.60796944 | 0.000935229 |
| [ENSCAFG00000004691](http://www.ensembl.org/id/ENSCAFG00000004691) | HID1 | 21.92920172 | 1.999319704 | 0.024047836 |
| [ENSCAFG00000015444](http://www.ensembl.org/id/ENSCAFG00000015444) | DMXL2 | 21.77881106 | 5.932965801 | 1.15392E-13 |
| [ENSCAFG00000010652](http://www.ensembl.org/id/ENSCAFG00000010652) | STK17B | 21.77742233 | 2.886703659 | 1.53004E-08 |
| [ENSCAFG00000006054](http://www.ensembl.org/id/ENSCAFG00000006054) | SLC16A3 | 21.76429775 | 4.161894929 | 0 |
| [ENSCAFG00000001814](http://www.ensembl.org/id/ENSCAFG00000001814) | PTK7 | 21.74846291 | 2.020632997 | 0.000598102 |
| [ENSCAFG00000000851](http://www.ensembl.org/id/ENSCAFG00000000851) | IRF1 | 21.73968903 | 1.38162827 | 0.040173995 |
| [ENSCAFG00000018583](http://www.ensembl.org/id/ENSCAFG00000018583) | PDE4B | 21.67954461 | 3.203895519 | 4.44824E-08 |
| [ENSCAFG00000023107](http://www.ensembl.org/id/ENSCAFG00000023107) | OAS2 | 21.64784656 | 2.451077791 | 6.14397E-07 |
| [ENSCAFG00000006503](http://www.ensembl.org/id/ENSCAFG00000006503) | RBPMS | 21.64440567 | 1.209282808 | 0.039182535 |
| [ENSCAFG00000001114](http://www.ensembl.org/id/ENSCAFG00000001114) | ARHGAP18 | 21.62676762 | 1.523393872 | 0.002012547 |
| [ENSCAFG00000008234](http://www.ensembl.org/id/ENSCAFG00000008234) | DLA-79 | 21.58498287 | 2.602261177 | 6.10335E-06 |
| [ENSCAFG00000006815](http://www.ensembl.org/id/ENSCAFG00000006815) | TUSC3 | 21.53730849 | 1.80979397 | 9.46231E-05 |
| [ENSCAFG00000028933](http://www.ensembl.org/id/ENSCAFG00000028933) | IGSF8 | 21.31959533 | 2.004076883 | 5.45529E-05 |
| [ENSCAFG00000001800](http://www.ensembl.org/id/ENSCAFG00000001800) | TMEM263 | 21.25534343 | 3.000112968 | 8.35687E-10 |
| [ENSCAFG00000002096](http://www.ensembl.org/id/ENSCAFG00000002096) | UXS1 | 21.23747765 | 1.994117945 | 1.39807E-06 |
| [ENSCAFG00000001508](http://www.ensembl.org/id/ENSCAFG00000001508) | RAC2 | 21.21760663 | 1.873059605 | 0.00381042 |
| [ENSCAFG00000025202](http://www.ensembl.org/id/ENSCAFG00000025202) | CA2 | 21.21659901 | 2.819194579 | 0.001024085 |
| [ENSCAFG00000018719](http://www.ensembl.org/id/ENSCAFG00000018719) | ALDOC | 21.19100978 | 2.756439883 | 2.54331E-07 |
| [ENSCAFG00000031126](http://www.ensembl.org/id/ENSCAFG00000031126) | HSPA13 | 21.18244478 | 1.673734083 | 0.001377571 |
| [ENSCAFG00000000160](http://www.ensembl.org/id/ENSCAFG00000000160) | NAB2 | 21.15780527 | 2.238580025 | 7.0248E-08 |
| [ENSCAFG00000029131](http://www.ensembl.org/id/ENSCAFG00000029131) | HAPLN1 | 21.15476031 | 8.346780459 | 4.65093E-12 |
| [ENSCAFG00000019451](http://www.ensembl.org/id/ENSCAFG00000019451) | TKTL1 | 20.96730055 | 2.517187848 | 0.000480568 |
| [ENSCAFG00000006119](http://www.ensembl.org/id/ENSCAFG00000006119) | PRKD3 | 20.95840269 | 1.281508998 | 0.012579066 |
| [ENSCAFG00000003698](http://www.ensembl.org/id/ENSCAFG00000003698) | TEAD2 | 20.93907315 | 1.53896545 | 0.000453113 |
| [ENSCAFG00000000771](http://www.ensembl.org/id/ENSCAFG00000000771) | AGPAT1 | 20.8789351 | 1.432556268 | 0.008114456 |
| [ENSCAFG00000002077](http://www.ensembl.org/id/ENSCAFG00000002077) | CA9 | 20.84431859 | 3.870138636 | 2.80472E-07 |
| [ENSCAFG00000013973](http://www.ensembl.org/id/ENSCAFG00000013973) | GFAP | 20.83756407 | 5.109736831 | 3.19626E-09 |
| [ENSCAFG00000014273](http://www.ensembl.org/id/ENSCAFG00000014273) | RDX | 20.76106073 | 1.312916216 | 0.004650023 |
| [ENSCAFG00000002519](http://www.ensembl.org/id/ENSCAFG00000002519) | ITGB8 | 20.739213 | 4.433464175 | 4.82251E-07 |
| [ENSCAFG00000023774](http://www.ensembl.org/id/ENSCAFG00000023774) | RAMP1 | 20.73441837 | 1.983761662 | 0.017750878 |
| [ENSCAFG00000028461](http://www.ensembl.org/id/ENSCAFG00000028461) | LOX | 20.72108397 | 1.521196996 | 0.0397065 |
| [ENSCAFG00000011898](http://www.ensembl.org/id/ENSCAFG00000011898) | SLC19A1 | 20.64129163 | 1.533466325 | 0.000778116 |
| [ENSCAFG00000004853](http://www.ensembl.org/id/ENSCAFG00000004853) | CHPF2 | 20.62273892 | 1.176222156 | 0.017726191 |
| [ENSCAFG00000013180](http://www.ensembl.org/id/ENSCAFG00000013180) | DDR2 | 20.61789481 | 1.584275233 | 0.001766763 |
| [ENSCAFG00000015360](http://www.ensembl.org/id/ENSCAFG00000015360) | GLDN | 20.59330588 | 3.343282723 | 9.14572E-09 |
| [ENSCAFG00000008869](http://www.ensembl.org/id/ENSCAFG00000008869) | TGM2 | 20.58803119 | 1.985001852 | 0.005752831 |
| [ENSCAFG00000010243](http://www.ensembl.org/id/ENSCAFG00000010243) | ARL3 | 20.55289504 | 1.766983479 | 0.002860251 |
| [ENSCAFG00000031675](http://www.ensembl.org/id/ENSCAFG00000031675) | COL8A1 | 20.52913067 | 3.987943038 | 5.1431E-08 |
| [ENSCAFG00000000261](http://www.ensembl.org/id/ENSCAFG00000000261) | RPA3 | 20.49702961 | 1.509507528 | 0.039670467 |
| [ENSCAFG00000016856](http://www.ensembl.org/id/ENSCAFG00000016856) | STK10 | 20.48207727 | 2.77470792 | 4.04364E-11 |
| [ENSCAFG00000007662](http://www.ensembl.org/id/ENSCAFG00000007662) | ACSL1 | 20.43585993 | 1.162163428 | 0.047392177 |
| [ENSCAFG00000012736](http://www.ensembl.org/id/ENSCAFG00000012736) | NIT1 | 20.43580748 | 1.651819467 | 0.006358615 |
| [ENSCAFG00000016905](http://www.ensembl.org/id/ENSCAFG00000016905) | TLN2 | 20.42527647 | 2.916298901 | 0.000643246 |
| [ENSCAFG00000012537](http://www.ensembl.org/id/ENSCAFG00000012537) | PHLDB1 | 20.39172227 | 1.862485903 | 0.000159445 |
| [ENSCAFG00000019990](http://www.ensembl.org/id/ENSCAFG00000019990) | IER5L | 20.36519721 | 2.55137332 | 3.18165E-07 |
| [ENSCAFG00000011039](http://www.ensembl.org/id/ENSCAFG00000011039) | ITGB2 | 20.32601598 | 3.745866643 | 1.67614E-12 |
| [ENSCAFG00000016138](http://www.ensembl.org/id/ENSCAFG00000016138) | FBLIM1 | 20.2883289 | 2.059048204 | 5.44624E-05 |
| [ENSCAFG00000000052](http://www.ensembl.org/id/ENSCAFG00000000052) | CDH19 | 20.28494008 | 3.750093096 | 3.94471E-05 |
| [ENSCAFG00000019500](http://www.ensembl.org/id/ENSCAFG00000019500) | GAMT | 20.20856688 | 1.73431653 | 0.002617255 |
| [ENSCAFG00000017144](http://www.ensembl.org/id/ENSCAFG00000017144) | VASH1 | 20.16880612 | 2.722230027 | 1.54097E-08 |
| [ENSCAFG00000008123](http://www.ensembl.org/id/ENSCAFG00000008123) | TENM3 | 20.152019 | 5.451911572 | 1.67156E-14 |
| [ENSCAFG00000006608](http://www.ensembl.org/id/ENSCAFG00000006608) | CPXM1 | 20.13265465 | 3.75001407 | 5.23331E-06 |
| [ENSCAFG00000019427](http://www.ensembl.org/id/ENSCAFG00000019427) | MOB3A | 20.12823556 | 1.162233328 | 0.045605757 |
| [ENSCAFG00000009209](http://www.ensembl.org/id/ENSCAFG00000009209) | NR4A2 | 20.0600522 | 3.734398414 | 5.5845E-05 |
| [ENSCAFG00000014484](http://www.ensembl.org/id/ENSCAFG00000014484) | ETV4 | 20.03650506 | 2.215112098 | 0.009164663 |
| [ENSCAFG00000031409](http://www.ensembl.org/id/ENSCAFG00000031409) | TMEM176A | 20.03397191 | 3.716053316 | 1.67156E-14 |
| [ENSCAFG00000009407](http://www.ensembl.org/id/ENSCAFG00000009407) | LPCAT2 | 20.02025341 | 1.301416793 | 0.031191158 |
| [ENSCAFG00000016825](http://www.ensembl.org/id/ENSCAFG00000016825) | SH3PXD2B | 19.99054989 | 2.246118479 | 6.93359E-07 |
| [ENSCAFG00000016814](http://www.ensembl.org/id/ENSCAFG00000016814) | PNPO | 19.86823775 | 1.421473869 | 0.024501455 |
| [ENSCAFG00000031158](http://www.ensembl.org/id/ENSCAFG00000031158) | EPDR1 | 19.8542993 | 2.674240377 | 4.6603E-05 |
| [ENSCAFG00000004762](http://www.ensembl.org/id/ENSCAFG00000004762) | SLC25A19 | 19.84214959 | 1.90757882 | 0.000931109 |
| [ENSCAFG00000002001](http://www.ensembl.org/id/ENSCAFG00000002001) | SGCB | 19.79655785 | 1.154679226 | 0.030171227 |
| [ENSCAFG00000008483](http://www.ensembl.org/id/ENSCAFG00000008483) | NDRG4 | 19.7778689 | 1.423029032 | 0.001728772 |
| [ENSCAFG00000013482](http://www.ensembl.org/id/ENSCAFG00000013482) | CADM1 | 19.69770931 | 3.42271145 | 3.32608E-11 |
| [ENSCAFG00000011462](http://www.ensembl.org/id/ENSCAFG00000011462) | CFI | 19.68123003 | 1.83287936 | 0.02998496 |
| [ENSCAFG00000001709](http://www.ensembl.org/id/ENSCAFG00000001709) | MCM5 | 19.66734722 | 1.49808406 | 0.012803427 |
| [ENSCAFG00000010603](http://www.ensembl.org/id/ENSCAFG00000010603) | RGS1 | 19.66680417 | 4.559895153 | 2.23571E-13 |
| [ENSCAFG00000012345](http://www.ensembl.org/id/ENSCAFG00000012345) | SEC24D | 19.64156726 | 2.023347975 | 8.15937E-06 |
| [ENSCAFG00000018442](http://www.ensembl.org/id/ENSCAFG00000018442) | LPIN2 | 19.56758086 | 1.625615315 | 0.000637822 |
| [ENSCAFG00000011038](http://www.ensembl.org/id/ENSCAFG00000011038) | WIPI1 | 19.54397449 | 2.033960464 | 3.99997E-06 |
| [ENSCAFG00000015157](http://www.ensembl.org/id/ENSCAFG00000015157) | TNIK | 19.51839693 | 4.792793663 | 0 |
| [ENSCAFG00000011559](http://www.ensembl.org/id/ENSCAFG00000011559) | HCLS1 | 19.36909858 | 1.948923037 | 0.000554125 |
| [ENSCAFG00000015000](http://www.ensembl.org/id/ENSCAFG00000015000) | TACC3 | 19.36897254 | 1.851979875 | 2.43955E-05 |
| [ENSCAFG00000013933](http://www.ensembl.org/id/ENSCAFG00000013933) | Nox2 | 19.36617354 | 2.681140458 | 2.90305E-06 |
| [ENSCAFG00000016531](http://www.ensembl.org/id/ENSCAFG00000016531) | ADGRA3 | 19.36470062 | 2.424441409 | 2.96799E-05 |
| [ENSCAFG00000030558](http://www.ensembl.org/id/ENSCAFG00000030558) | RTL5 | 19.34547147 | 1.16769629 | 0.048498393 |
| [ENSCAFG00000015522](http://www.ensembl.org/id/ENSCAFG00000015522) | TEAD4 | 19.34286306 | 2.191250015 | 7.24923E-05 |
| [ENSCAFG00000001740](http://www.ensembl.org/id/ENSCAFG00000001740) | LARGE1 | 19.34119252 | 2.029255248 | 0.006110293 |
| [ENSCAFG00000007273](http://www.ensembl.org/id/ENSCAFG00000007273) | FAT1 | 19.26876999 | 2.581812809 | 5.15974E-05 |
| [ENSCAFG00000032685](http://www.ensembl.org/id/ENSCAFG00000032685) | C1QTNF5 | 19.25082743 | 2.248778412 | 0.000217063 |
| [ENSCAFG00000001166](http://www.ensembl.org/id/ENSCAFG00000001166) | KHDRBS3 | 19.22690997 | 2.692540302 | 1.23401E-05 |
| [ENSCAFG00000017482](http://www.ensembl.org/id/ENSCAFG00000017482) | ITGA11 | 19.22396992 | 2.833619011 | 7.56239E-07 |
| [ENSCAFG00000019810](http://www.ensembl.org/id/ENSCAFG00000019810) | VAV2 | 19.22008993 | 1.400000313 | 0.002191632 |
| [ENSCAFG00000014453](http://www.ensembl.org/id/ENSCAFG00000014453) | AFAP1 | 19.1779828 | 3.099359483 | 8.66135E-15 |
| [ENSCAFG00000012140](http://www.ensembl.org/id/ENSCAFG00000012140) | PRC1 | 19.13871232 | 1.174503436 | 0.047782432 |
| [ENSCAFG00000011499](http://www.ensembl.org/id/ENSCAFG00000011499) | SNAI1 | 19.12976665 | 3.966482969 | 8.29278E-13 |
| [ENSCAFG00000024320](http://www.ensembl.org/id/ENSCAFG00000024320) | FXYD5 | 19.11187899 | 2.367048202 | 4.29843E-07 |
| [ENSCAFG00000010161](http://www.ensembl.org/id/ENSCAFG00000010161) | LPL | 19.1032562 | 1.748266261 | 0.042318884 |
| [ENSCAFG00000002342](http://www.ensembl.org/id/ENSCAFG00000002342) | ETV1 | 19.04643256 | 3.105611889 | 1.32573E-07 |
| [ENSCAFG00000032562](http://www.ensembl.org/id/ENSCAFG00000032562) | CFL2 | 18.8892222 | 1.828157533 | 8.15487E-05 |
| [ENSCAFG00000004656](http://www.ensembl.org/id/ENSCAFG00000004656) | ITGA8 | 18.82895421 | 3.644527488 | 0.000394829 |
| [ENSCAFG00000007199](http://www.ensembl.org/id/ENSCAFG00000007199) | KRT8 | 18.79368579 | 5.493985916 | 1.39026E-05 |
| [ENSCAFG00000016504](http://www.ensembl.org/id/ENSCAFG00000016504) | IL27RA | 18.78265009 | 1.958202481 | 3.90815E-05 |
| [ENSCAFG00000015641](http://www.ensembl.org/id/ENSCAFG00000015641) | OBSL1 | 18.77979675 | 2.326396412 | 8.02709E-06 |
| [ENSCAFG00000020004](http://www.ensembl.org/id/ENSCAFG00000020004) | VCAM1 | 18.75416698 | 1.762302712 | 0.021415229 |
| [ENSCAFG00000019678](http://www.ensembl.org/id/ENSCAFG00000019678) | SDCCAG3 | 18.74595168 | 1.413885738 | 0.009847107 |
| [ENSCAFG00000019772](http://www.ensembl.org/id/ENSCAFG00000019772) | CD53 | 18.73939304 | 2.405975895 | 3.58182E-05 |
| [ENSCAFG00000014817](http://www.ensembl.org/id/ENSCAFG00000014817) | ISYNA1 | 18.67661482 | 2.140709982 | 9.71475E-05 |
| [ENSCAFG00000007653](http://www.ensembl.org/id/ENSCAFG00000007653) | ST3GAL5 | 18.54605406 | 1.754056317 | 0.000857423 |
| [ENSCAFG00000004652](http://www.ensembl.org/id/ENSCAFG00000004652) | GLB1 | 18.51581165 | 1.361537057 | 0.012774145 |
| [ENSCAFG00000010744](http://www.ensembl.org/id/ENSCAFG00000010744) | NAV1 | 18.50869808 | 2.670007019 | 1.90178E-09 |
| [ENSCAFG00000019902](http://www.ensembl.org/id/ENSCAFG00000019902) | RAPGEF1 | 18.45554717 | 1.117024798 | 0.027730203 |
| [ENSCAFG00000001825](http://www.ensembl.org/id/ENSCAFG00000001825) | TMEM2 | 18.38882199 | 2.161871249 | 9.8767E-06 |
| [ENSCAFG00000025213](http://www.ensembl.org/id/ENSCAFG00000025213) | FAM111B | 18.37893636 | 2.46185941 | 8.48867E-08 |
| [ENSCAFG00000008349](http://www.ensembl.org/id/ENSCAFG00000008349) | DOK1 | 18.28478589 | 1.76287864 | 0.001589203 |
| [ENSCAFG00000001136](http://www.ensembl.org/id/ENSCAFG00000001136) | EPB41L2 | 18.27791756 | 1.260895418 | 0.014991941 |
| [ENSCAFG00000011789](http://www.ensembl.org/id/ENSCAFG00000011789) | ZFAND2A | 18.26662971 | 1.847301585 | 0.002446893 |
| [ENSCAFG00000003348](http://www.ensembl.org/id/ENSCAFG00000003348) | MBOAT2 | 18.23938883 | 5.249162506 | 0 |
| [ENSCAFG00000010621](http://www.ensembl.org/id/ENSCAFG00000010621) | RRP1B | 18.23882159 | 1.04236191 | 0.049199211 |
| [ENSCAFG00000011799](http://www.ensembl.org/id/ENSCAFG00000011799) | GPM6B | 18.21319047 | 3.553858214 | 2.44024E-07 |
| [ENSCAFG00000011193](http://www.ensembl.org/id/ENSCAFG00000011193) | PDGFA | 18.19971207 | 2.406386891 | 0.00071762 |
| [ENSCAFG00000008341](http://www.ensembl.org/id/ENSCAFG00000008341) | SPON1 | 18.01714777 | 2.684623984 | 1.29661E-05 |
| [ENSCAFG00000001837](http://www.ensembl.org/id/ENSCAFG00000001837) | DNPH1 | 17.97173431 | 2.467858697 | 0.000441472 |
| [ENSCAFG00000018063](http://www.ensembl.org/id/ENSCAFG00000018063) | ACSL4 | 17.93995948 | 3.034574899 | 1.34772E-10 |
| [ENSCAFG00000014843](http://www.ensembl.org/id/ENSCAFG00000014843) | FERMT2 | 17.93956004 | 2.003798917 | 6.317E-06 |
| [ENSCAFG00000014061](http://www.ensembl.org/id/ENSCAFG00000014061) | DIXDC1 | 17.93349019 | 2.404804328 | 6.96544E-06 |
| [ENSCAFG00000029752](http://www.ensembl.org/id/ENSCAFG00000029752) | C5orf15 | 17.89475891 | 1.438911777 | 0.007457251 |
| [ENSCAFG00000010019](http://www.ensembl.org/id/ENSCAFG00000010019) | PCBP4 | 17.86969466 | 1.988780699 | 9.28071E-05 |
| [ENSCAFG00000004052](http://www.ensembl.org/id/ENSCAFG00000004052) | MCM2 | 17.86574305 | 1.850448423 | 0.00011009 |
| [ENSCAFG00000017094](http://www.ensembl.org/id/ENSCAFG00000017094) | ZNF609 | 17.82366055 | 1.511428878 | 0.026182484 |
| [ENSCAFG00000014577](http://www.ensembl.org/id/ENSCAFG00000014577) | VEGFB | 17.78107338 | 1.626509008 | 0.00196152 |
| [ENSCAFG00000001565](http://www.ensembl.org/id/ENSCAFG00000001565) | DAAM2 | 17.74092966 | 2.08998244 | 3.012E-05 |
| [ENSCAFG00000005660](http://www.ensembl.org/id/ENSCAFG00000005660) | TNFAIP6 | 17.73296207 | 4.338974443 | 3.94494E-11 |
| [ENSCAFG00000011487](http://www.ensembl.org/id/ENSCAFG00000011487) | BCAT1 | 17.73253175 | 3.002435288 | 4.59499E-10 |
| [ENSCAFG00000002765](http://www.ensembl.org/id/ENSCAFG00000002765) | UBA6 | 17.60515939 | 1.28795885 | 0.022655518 |
| [ENSCAFG00000004496](http://www.ensembl.org/id/ENSCAFG00000004496) | MRC1 | 17.5507864 | 2.256079793 | 0.000100839 |
| [ENSCAFG00000002270](http://www.ensembl.org/id/ENSCAFG00000002270) | NINJ1 | 17.47230159 | 1.202710826 | 0.018421465 |
| [ENSCAFG00000032626](http://www.ensembl.org/id/ENSCAFG00000032626) | SRM | 17.42537862 | 1.519815903 | 0.00228243 |
| [ENSCAFG00000014473](http://www.ensembl.org/id/ENSCAFG00000014473) | BCHE | 17.39884238 | 2.889542643 | 0.033519826 |
| [ENSCAFG00000009350](http://www.ensembl.org/id/ENSCAFG00000009350) | PYROXD2 | 17.36550873 | 1.721079197 | 0.001024085 |
| [ENSCAFG00000013965](http://www.ensembl.org/id/ENSCAFG00000013965) | SLC24A5 | 17.29776536 | 2.478425072 | 0.011396973 |
| [ENSCAFG00000020152](http://www.ensembl.org/id/ENSCAFG00000020152) | IL34 | 17.29408833 | 2.646064582 | 0.000369121 |
| [ENSCAFG00000008587](http://www.ensembl.org/id/ENSCAFG00000008587) | SPATS2 | 17.26079229 | 1.600445664 | 0.00044366 |
| [ENSCAFG00000030843](http://www.ensembl.org/id/ENSCAFG00000030843) | INSIG2 | 17.25915702 | 1.207673019 | 0.046454658 |
| [ENSCAFG00000014372](http://www.ensembl.org/id/ENSCAFG00000014372) | G6PC3 | 17.25095811 | 1.672409043 | 0.001869617 |
| [ENSCAFG00000015684](http://www.ensembl.org/id/ENSCAFG00000015684) | USP42 | 17.18845517 | 1.285717295 | 0.026919247 |
| [ENSCAFG00000003136](http://www.ensembl.org/id/ENSCAFG00000003136) | CCM2 | 17.18203047 | 1.659537101 | 0.000616813 |
| [ENSCAFG00000015806](http://www.ensembl.org/id/ENSCAFG00000015806) | AKT3 | 17.18054522 | 2.21003265 | 3.0089E-06 |
| [ENSCAFG00000010614](http://www.ensembl.org/id/ENSCAFG00000010614) | HSF2BP | 17.17631164 | 1.420035869 | 0.031161331 |
| [ENSCAFG00000011371](http://www.ensembl.org/id/ENSCAFG00000011371) | LIX1L | 17.17291842 | 2.403413118 | 6.25671E-07 |
| [ENSCAFG00000030271](http://www.ensembl.org/id/ENSCAFG00000030271) | UBE2QL1 | 17.15852746 | 4.541174003 | 2.44458E-10 |
| [ENSCAFG00000004738](http://www.ensembl.org/id/ENSCAFG00000004738) | ZNF428 | 17.11940867 | 2.120923036 | 0.000477606 |
| [ENSCAFG00000023755](http://www.ensembl.org/id/ENSCAFG00000023755) | GMPPB | 17.1165695 | 1.158646467 | 0.039527809 |
| [ENSCAFG00000014089](http://www.ensembl.org/id/ENSCAFG00000014089) | GJC1 | 17.11586399 | 4.385813844 | 0 |
| [ENSCAFG00000008478](http://www.ensembl.org/id/ENSCAFG00000008478) | MOGS | 17.06971485 | 1.656341179 | 0.000246546 |
| [ENSCAFG00000009273](http://www.ensembl.org/id/ENSCAFG00000009273) | STAB1 | 17.06854723 | 1.777545683 | 0.002267924 |
| [ENSCAFG00000001531](http://www.ensembl.org/id/ENSCAFG00000001531) | SMO | 17.05957654 | 1.50740667 | 0.000688154 |
| [ENSCAFG00000016623](http://www.ensembl.org/id/ENSCAFG00000016623) | VSIG4 | 17.05780774 | 2.822592197 | 2.66706E-06 |
| [ENSCAFG00000031353](http://www.ensembl.org/id/ENSCAFG00000031353) | BST2 | 17.00812587 | 2.76403222 | 2.99161E-05 |
| [ENSCAFG00000013483](http://www.ensembl.org/id/ENSCAFG00000013483) | TMEM120A | 16.94398535 | 1.541011811 | 0.010827047 |
| [ENSCAFG00000008932](http://www.ensembl.org/id/ENSCAFG00000008932) | SMYD5 | 16.90140913 | 1.134648184 | 0.027027291 |
| [ENSCAFG00000024758](http://www.ensembl.org/id/ENSCAFG00000024758) | ADAMTS5 | 16.8989828 | 3.076715743 | 2.23121E-05 |
| [ENSCAFG00000017677](http://www.ensembl.org/id/ENSCAFG00000017677) | GGA2 | 16.86827459 | 1.82544278 | 0.000477606 |
| [ENSCAFG00000002204](http://www.ensembl.org/id/ENSCAFG00000002204) | S1PR3 | 16.79846475 | 6.628436532 | 6.28947E-14 |
| [ENSCAFG00000009416](http://www.ensembl.org/id/ENSCAFG00000009416) | TSPAN18 | 16.781659 | 1.936265546 | 0.000613968 |
| [ENSCAFG00000004295](http://www.ensembl.org/id/ENSCAFG00000004295) | RNASEH2B | 16.77626395 | 1.732102462 | 0.000552583 |
| [ENSCAFG00000013297](http://www.ensembl.org/id/ENSCAFG00000013297) | IGF2BP2 | 16.76377122 | 4.071408692 | 0 |
| [ENSCAFG00000023401](http://www.ensembl.org/id/ENSCAFG00000023401) | CYP4F3 | 16.75123076 | 5.897719048 | 1.87875E-13 |
| [ENSCAFG00000007976](http://www.ensembl.org/id/ENSCAFG00000007976) | TEAD1 | 16.69459947 | 1.536252057 | 0.003850765 |
| [ENSCAFG00000020139](http://www.ensembl.org/id/ENSCAFG00000020139) | ST3GAL2 | 16.69206694 | 2.175920218 | 3.7147E-05 |
| [ENSCAFG00000001906](http://www.ensembl.org/id/ENSCAFG00000001906) | FZD1 | 16.65871273 | 1.879650394 | 0.000309321 |
| [ENSCAFG00000002214](http://www.ensembl.org/id/ENSCAFG00000002214) | TRAM2 | 16.58248968 | 1.835594593 | 0.00017121 |
| [ENSCAFG00000025567](http://www.ensembl.org/id/ENSCAFG00000025567) | A2M | 16.57721136 | 4.338114778 | 0 |
| [ENSCAFG00000003646](http://www.ensembl.org/id/ENSCAFG00000003646) | SFRP4 | 16.57374174 | 2.65479509 | 0.029820767 |
| [ENSCAFG00000010142](http://www.ensembl.org/id/ENSCAFG00000010142) | SLC39A10 | 16.55097963 | 1.684737745 | 0.000157028 |
| [ENSCAFG00000002102](http://www.ensembl.org/id/ENSCAFG00000002102) | JAK2 | 16.50004577 | 1.181654403 | 0.023157674 |
| [ENSCAFG00000010949](http://www.ensembl.org/id/ENSCAFG00000010949) | SLC37A2 | 16.44347492 | 4.403598924 | 0 |
| [ENSCAFG00000030978](http://www.ensembl.org/id/ENSCAFG00000030978) | THAP7 | 16.42701304 | 2.05329486 | 0.018699426 |
| [ENSCAFG00000018033](http://www.ensembl.org/id/ENSCAFG00000018033) | PTPN9 | 16.37492627 | 1.25299464 | 0.014088585 |
| [ENSCAFG00000015229](http://www.ensembl.org/id/ENSCAFG00000015229) | MAP1S | 16.37291161 | 1.957888651 | 1.73595E-05 |
| [ENSCAFG00000009074](http://www.ensembl.org/id/ENSCAFG00000009074) | HOMER1 | 16.36755096 | 1.794771705 | 0.000898515 |
| [ENSCAFG00000002921](http://www.ensembl.org/id/ENSCAFG00000002921) | SKAP2 | 16.35065663 | 1.254839805 | 0.010244642 |
| [ENSCAFG00000016677](http://www.ensembl.org/id/ENSCAFG00000016677) | NCAPG | 16.29078623 | 1.817824856 | 0.000864192 |
| [ENSCAFG00000032052](http://www.ensembl.org/id/ENSCAFG00000032052) | FAM216A | 16.19161433 | 1.501770509 | 0.00345658 |
| [ENSCAFG00000017616](http://www.ensembl.org/id/ENSCAFG00000017616) | LARP6 | 16.16594612 | 1.277087882 | 0.012158568 |
| [ENSCAFG00000003186](http://www.ensembl.org/id/ENSCAFG00000003186) | AKIRIN1 | 16.15636754 | 1.714216934 | 0.014042384 |
| [ENSCAFG00000015564](http://www.ensembl.org/id/ENSCAFG00000015564) | JKAMP | 16.12929868 | 1.303145623 | 0.002029042 |
| [ENSCAFG00000002202](http://www.ensembl.org/id/ENSCAFG00000002202) | KIAA1211 | 16.11644185 | 5.111395034 | 6.77265E-08 |
| [ENSCAFG00000005714](http://www.ensembl.org/id/ENSCAFG00000005714) | CXXC5 | 16.09289596 | 2.004450409 | 0.000349229 |
| [ENSCAFG00000014482](http://www.ensembl.org/id/ENSCAFG00000014482) | SAV1 | 16.06481582 | 1.176789386 | 0.024938331 |
| [ENSCAFG00000015043](http://www.ensembl.org/id/ENSCAFG00000015043) | MMP13 | 15.98455615 | 3.801700125 | 7.55556E-06 |
| [ENSCAFG00000003106](http://www.ensembl.org/id/ENSCAFG00000003106) | EHBP1 | 15.97598149 | 1.370230305 | 0.023772191 |
| [ENSCAFG00000007489](http://www.ensembl.org/id/ENSCAFG00000007489) | RILPL2 | 15.97539421 | 2.120869957 | 0.00018184 |
| [ENSCAFG00000000267](http://www.ensembl.org/id/ENSCAFG00000000267) | TNFAIP3 | 15.96031229 | 2.753500746 | 1.3662E-08 |
| [ENSCAFG00000010408](http://www.ensembl.org/id/ENSCAFG00000010408) | MLEC | 15.93608777 | 1.549116896 | 0.002545522 |
| [ENSCAFG00000009782](http://www.ensembl.org/id/ENSCAFG00000009782) | PRICKLE1 | 15.92653035 | 1.798710714 | 0.000118146 |
| [ENSCAFG00000005483](http://www.ensembl.org/id/ENSCAFG00000005483) | ARHGEF40 | 15.90130249 | 2.302843297 | 5.63833E-07 |
| [ENSCAFG00000014896](http://www.ensembl.org/id/ENSCAFG00000014896) | SCARF2 | 15.87954748 | 4.477028826 | 0 |
| [ENSCAFG00000008811](http://www.ensembl.org/id/ENSCAFG00000008811) | RND1 | 15.85091103 | 5.092553546 | 1.54164E-11 |
| [ENSCAFG00000003376](http://www.ensembl.org/id/ENSCAFG00000003376) | CSF3R | 15.83849636 | 5.612821052 | 0 |
| [ENSCAFG00000017658](http://www.ensembl.org/id/ENSCAFG00000017658) | PLK1 | 15.78334724 | 1.595940946 | 0.00125579 |
| [ENSCAFG00000029563](http://www.ensembl.org/id/ENSCAFG00000029563) | DIO3 | 15.77776362 | 5.595303608 | 3.17054E-08 |
| [ENSCAFG00000010738](http://www.ensembl.org/id/ENSCAFG00000010738) | SEC22B | 15.73917771 | 1.392908118 | 0.005285135 |
| [ENSCAFG00000015657](http://www.ensembl.org/id/ENSCAFG00000015657) | PCSK1N | 15.6551296 | 3.241638957 | 1.03311E-06 |
| [ENSCAFG00000007909](http://www.ensembl.org/id/ENSCAFG00000007909) | RHOBTB3 | 15.63877078 | 2.916210787 | 1.59371E-08 |
| [ENSCAFG00000000992](http://www.ensembl.org/id/ENSCAFG00000000992) | ATAD2 | 15.63417091 | 1.518531901 | 0.00230123 |
| [ENSCAFG00000007075](http://www.ensembl.org/id/ENSCAFG00000007075) | TPX2 | 15.62617571 | 1.581914365 | 0.000496976 |
| [ENSCAFG00000005465](http://www.ensembl.org/id/ENSCAFG00000005465) | DZIP1 | 15.60347568 | 2.005670662 | 4.45592E-06 |
| [ENSCAFG00000001519](http://www.ensembl.org/id/ENSCAFG00000001519) | CSF2RB | 15.58823315 | 1.446866243 | 0.029405241 |
| [ENSCAFG00000015662](http://www.ensembl.org/id/ENSCAFG00000015662) | GNB5 | 15.52919495 | 2.510220503 | 0.001774699 |
| [ENSCAFG00000009721](http://www.ensembl.org/id/ENSCAFG00000009721) | ALCAM | 15.51596569 | 1.795965683 | 0.003415715 |
| [ENSCAFG00000018177](http://www.ensembl.org/id/ENSCAFG00000018177) | XYLT1 | 15.47995915 | 2.368680042 | 1.14783E-06 |
| [ENSCAFG00000003644](http://www.ensembl.org/id/ENSCAFG00000003644) | STARD3NL | 15.44834061 | 1.614771209 | 0.002281632 |
| [ENSCAFG00000008210](http://www.ensembl.org/id/ENSCAFG00000008210) | GREM1 | 15.3387829 | 2.364179278 | 0.004048794 |
| [ENSCAFG00000013367](http://www.ensembl.org/id/ENSCAFG00000013367) | HIP1 | 15.2440646 | 1.658935137 | 0.000543283 |
| [ENSCAFG00000001911](http://www.ensembl.org/id/ENSCAFG00000001911) | ALDH1L2 | 15.22605315 | 3.315946091 | 6.28947E-14 |
| [ENSCAFG00000006665](http://www.ensembl.org/id/ENSCAFG00000006665) | CLIP3 | 15.22381352 | 2.230024473 | 1.88392E-05 |
| [ENSCAFG00000000287](http://www.ensembl.org/id/ENSCAFG00000000287) | CYP27B1 | 15.20224355 | 5.901939515 | 2.67474E-10 |
| [ENSCAFG00000009905](http://www.ensembl.org/id/ENSCAFG00000009905) | MMP9 | 15.19461628 | 6.728881362 | 0 |
| [ENSCAFG00000019694](http://www.ensembl.org/id/ENSCAFG00000019694) | GPSM1 | 15.12316632 | 2.961394176 | 7.15313E-11 |
| [ENSCAFG00000014117](http://www.ensembl.org/id/ENSCAFG00000014117) | MMP11 | 15.12307948 | 2.506748933 | 6.92464E-06 |
| [ENSCAFG00000007383](http://www.ensembl.org/id/ENSCAFG00000007383) | EIF2AK3 | 15.10911227 | 1.247734905 | 0.02176735 |
| [ENSCAFG00000015067](http://www.ensembl.org/id/ENSCAFG00000015067) | KIFAP3 | 15.08334582 | 1.263615119 | 0.043531587 |
| [ENSCAFG00000015887](http://www.ensembl.org/id/ENSCAFG00000015887) | APBB2 | 15.05474655 | 1.283039761 | 0.009812817 |
| [ENSCAFG00000015698](http://www.ensembl.org/id/ENSCAFG00000015698) | ZCCHC24 | 15.05202713 | 1.421516598 | 0.016813507 |
| [ENSCAFG00000005984](http://www.ensembl.org/id/ENSCAFG00000005984) | KDELC1 | 15.00918385 | 2.062658207 | 1.29978E-05 |
| [ENSCAFG00000013922](http://www.ensembl.org/id/ENSCAFG00000013922) | ARNT2 | 15.00049975 | 3.310242389 | 7.17782E-11 |
| [ENSCAFG00000014403](http://www.ensembl.org/id/ENSCAFG00000014403) | SORCS2 | 14.91336286 | 4.740555637 | 1.66649E-09 |
| [ENSCAFG00000012904](http://www.ensembl.org/id/ENSCAFG00000012904) | CDK1 | 14.89385809 | 1.231597998 | 0.029135993 |
| [ENSCAFG00000014882](http://www.ensembl.org/id/ENSCAFG00000014882) | GDF15 | 14.8622223 | 8.808963059 | 3.58418E-07 |
| [ENSCAFG00000015169](http://www.ensembl.org/id/ENSCAFG00000015169) | SELE | 14.84944768 | 3.705611604 | 0.005165426 |
| [ENSCAFG00000011183](http://www.ensembl.org/id/ENSCAFG00000011183) | TM7SF3 | 14.83798454 | 1.413192625 | 0.010269609 |
| [ENSCAFG00000009773](http://www.ensembl.org/id/ENSCAFG00000009773) | NEDD9 | 14.71900217 | 2.173657358 | 5.13952E-05 |
| [ENSCAFG00000013329](http://www.ensembl.org/id/ENSCAFG00000013329) | LUZP1 | 14.65756935 | 1.104244086 | 0.032407784 |
| [ENSCAFG00000004175](http://www.ensembl.org/id/ENSCAFG00000004175) | C5AR1 | 14.65109832 | 4.973092761 | 0 |
| [ENSCAFG00000013420](http://www.ensembl.org/id/ENSCAFG00000013420) | ETV5 | 14.5472189 | 1.97052641 | 1.31107E-05 |
| [ENSCAFG00000006250](http://www.ensembl.org/id/ENSCAFG00000006250) | SPRY4 | 14.50309358 | 4.050791831 | 6.03211E-07 |
| [ENSCAFG00000016161](http://www.ensembl.org/id/ENSCAFG00000016161) | FAM114A1 | 14.49719869 | 2.057132768 | 3.08754E-05 |
| [ENSCAFG00000008857](http://www.ensembl.org/id/ENSCAFG00000008857) | CACNB3 | 14.4506228 | 2.229099064 | 4.38385E-05 |
| [ENSCAFG00000012908](http://www.ensembl.org/id/ENSCAFG00000012908) | THEM4 | 14.43855385 | 1.460325515 | 0.002437687 |
| [ENSCAFG00000003023](http://www.ensembl.org/id/ENSCAFG00000003023) | CHN2 | 14.43019652 | 3.814076978 | 4.02831E-14 |
| [ENSCAFG00000018765](http://www.ensembl.org/id/ENSCAFG00000018765) | DOCK7 | 14.41691252 | 1.759381146 | 0.000265277 |
| [ENSCAFG00000002657](http://www.ensembl.org/id/ENSCAFG00000002657) | TTYH1 | 14.38192849 | 4.601493733 | 1.98998E-08 |
| [ENSCAFG00000031318](http://www.ensembl.org/id/ENSCAFG00000031318) | P3H3 | 14.37018991 | 2.471100962 | 5.61088E-06 |
| [ENSCAFG00000011762](http://www.ensembl.org/id/ENSCAFG00000011762) | CA14 | 14.32096842 | 2.622176238 | 0.001198321 |
| [ENSCAFG00000009320](http://www.ensembl.org/id/ENSCAFG00000009320) | ARHGAP24 | 14.32085919 | 3.041431703 | 8.90991E-09 |
| [ENSCAFG00000020218](http://www.ensembl.org/id/ENSCAFG00000020218) | DHODH | 14.30302958 | 1.489319576 | 0.048778532 |
| [ENSCAFG00000018904](http://www.ensembl.org/id/ENSCAFG00000018904) | SNN | 14.29456672 | 1.981170141 | 0.019881407 |
| [ENSCAFG00000001596](http://www.ensembl.org/id/ENSCAFG00000001596) | FOXP4 | 14.25907481 | 1.451759385 | 0.001296677 |
| [ENSCAFG00000023383](http://www.ensembl.org/id/ENSCAFG00000023383) | FOXD3 | 14.25774904 | 5.80396222 | 0 |
| [ENSCAFG00000005327](http://www.ensembl.org/id/ENSCAFG00000005327) | TGDS | 14.25583935 | 1.50885666 | 0.03579303 |
| [ENSCAFG00000013454](http://www.ensembl.org/id/ENSCAFG00000013454) | MOV10 | 14.21226493 | 2.132314911 | 6.3598E-07 |
| [ENSCAFG00000011751](http://www.ensembl.org/id/ENSCAFG00000011751) | CD86 | 14.19570778 | 3.368395654 | 2.00077E-12 |
| [ENSCAFG00000014008](http://www.ensembl.org/id/ENSCAFG00000014008) | MYEF2 | 14.19552897 | 3.599672628 | 3.94256E-08 |
| [ENSCAFG00000017527](http://www.ensembl.org/id/ENSCAFG00000017527) | SRPX2 | 14.16117772 | 5.442926881 | 1.30496E-13 |
| [ENSCAFG00000014170](http://www.ensembl.org/id/ENSCAFG00000014170) | GMIP | 14.14478948 | 1.596060327 | 0.000175181 |
| [ENSCAFG00000003824](http://www.ensembl.org/id/ENSCAFG00000003824) | MICAL1 | 14.11792327 | 2.555067275 | 5.74189E-10 |
| [ENSCAFG00000000622](http://www.ensembl.org/id/ENSCAFG00000000622) | PRRC1 | 14.1043635 | 1.305282228 | 0.003733176 |
| [ENSCAFG00000015982](http://www.ensembl.org/id/ENSCAFG00000015982) | CDC42BPA | 14.09710189 | 1.800174255 | 0.000277119 |
| [ENSCAFG00000030931](http://www.ensembl.org/id/ENSCAFG00000030931) | LIF | 14.08700215 | 4.494866542 | 9.67453E-12 |
| [ENSCAFG00000018482](http://www.ensembl.org/id/ENSCAFG00000018482) | CERS4 | 14.04828613 | 1.872631523 | 2.02597E-05 |
| [ENSCAFG00000014195](http://www.ensembl.org/id/ENSCAFG00000014195) | IQCJ-SCHIP1 | 14.00781959 | 2.227997157 | 0.000162308 |
| [ENSCAFG00000029643](http://www.ensembl.org/id/ENSCAFG00000029643) | PIGK | 13.97650715 | 1.041856346 | 0.042930306 |
| [ENSCAFG00000002634](http://www.ensembl.org/id/ENSCAFG00000002634) | SOCS5 | 13.9709174 | 1.12215919 | 0.038678343 |
| [ENSCAFG00000007149](http://www.ensembl.org/id/ENSCAFG00000007149) | FBLN7 | 13.97081294 | 3.874338878 | 1.76881E-06 |
| [ENSCAFG00000001586](http://www.ensembl.org/id/ENSCAFG00000001586) | TREM2 | 13.96815761 | 6.088030738 | 0 |
| [ENSCAFG00000018487](http://www.ensembl.org/id/ENSCAFG00000018487) | EMB | 13.93948356 | 2.073581816 | 0.004587516 |
| [ENSCAFG00000011265](http://www.ensembl.org/id/ENSCAFG00000011265) | PTPRC | 13.91334742 | 2.056113337 | 0.000217587 |
| [ENSCAFG00000000502](http://www.ensembl.org/id/ENSCAFG00000000502) | IFGGC1 | 13.90353999 | 3.450858585 | 0.000719941 |
| [ENSCAFG00000016995](http://www.ensembl.org/id/ENSCAFG00000016995) | PGF | 13.89589156 | 2.601847195 | 1.07305E-05 |
| [ENSCAFG00000000869](http://www.ensembl.org/id/ENSCAFG00000000869) | PRR5 | 13.8839403 | 1.599388419 | 0.026143786 |
| [ENSCAFG00000011525](http://www.ensembl.org/id/ENSCAFG00000011525) | ISG20 | 13.86355881 | 4.624185287 | 3.28725E-09 |
| [ENSCAFG00000013490](http://www.ensembl.org/id/ENSCAFG00000013490) | FAM129A | 13.81465381 | 1.431338053 | 0.018899332 |
| [ENSCAFG00000018115](http://www.ensembl.org/id/ENSCAFG00000018115) | CDH2 | 13.81312628 | 6.204521232 | 1.66851E-11 |
| [ENSCAFG00000014148](http://www.ensembl.org/id/ENSCAFG00000014148) | ADAMTS7 | 13.81198604 | 4.777863618 | 0 |
| [ENSCAFG00000001792](http://www.ensembl.org/id/ENSCAFG00000001792) | LIMCH1 | 13.79582909 | 2.007766787 | 0.00121134 |
| [ENSCAFG00000004090](http://www.ensembl.org/id/ENSCAFG00000004090) | ADCY3 | 13.7845757 | 2.258102495 | 4.16432E-07 |
| [ENSCAFG00000009867](http://www.ensembl.org/id/ENSCAFG00000009867) | BBX | 13.70367622 | 1.007877214 | 0.047442502 |
| [ENSCAFG00000023730](http://www.ensembl.org/id/ENSCAFG00000023730) | BCL7B | 13.62495117 | 1.432705868 | 0.010771634 |
| [ENSCAFG00000008635](http://www.ensembl.org/id/ENSCAFG00000008635) | SOGA1 | 13.59685935 | 2.127922494 | 7.96381E-06 |
| [ENSCAFG00000016829](http://www.ensembl.org/id/ENSCAFG00000016829) | UBTD2 | 13.59254076 | 1.657643005 | 0.000588011 |
| [ENSCAFG00000012376](http://www.ensembl.org/id/ENSCAFG00000012376) | VASH2 | 13.58460851 | 5.048378371 | 0 |
| [ENSCAFG00000017473](http://www.ensembl.org/id/ENSCAFG00000017473) | CLN6 | 13.57705004 | 1.472757285 | 0.013076104 |
| [ENSCAFG00000008544](http://www.ensembl.org/id/ENSCAFG00000008544) | MMP15 | 13.54802432 | 1.507987135 | 0.019619499 |
| [ENSCAFG00000018859](http://www.ensembl.org/id/ENSCAFG00000018859) | PTPRS | 13.52905426 | 1.55088819 | 0.007333525 |
| [ENSCAFG00000012844](http://www.ensembl.org/id/ENSCAFG00000012844) | IL10RA | 13.51119767 | 2.18004072 | 0.00012787 |
| [ENSCAFG00000030542](http://www.ensembl.org/id/ENSCAFG00000030542) | FEN1 | 13.4815832 | 1.42883386 | 0.010330808 |
| [ENSCAFG00000006546](http://www.ensembl.org/id/ENSCAFG00000006546) | ARID5A | 13.47263055 | 1.610758915 | 0.000527133 |
| [ENSCAFG00000014014](http://www.ensembl.org/id/ENSCAFG00000014014) | AIFM2 | 13.46450424 | 2.152997121 | 8.21809E-05 |
| [ENSCAFG00000003560](http://www.ensembl.org/id/ENSCAFG00000003560) | CDK5RAP2 | 13.46228025 | 1.721569838 | 0.001689699 |
| [ENSCAFG00000000420](http://www.ensembl.org/id/ENSCAFG00000000420) | CPM | 13.42390326 | 3.561244738 | 9.49006E-07 |
| [ENSCAFG00000006420](http://www.ensembl.org/id/ENSCAFG00000006420) | APBB1 | 13.41479199 | 1.331034783 | 0.007546779 |
| [ENSCAFG00000008511](http://www.ensembl.org/id/ENSCAFG00000008511) | HVCN1 | 13.39298304 | 2.490768003 | 1.07856E-06 |
| [ENSCAFG00000010617](http://www.ensembl.org/id/ENSCAFG00000010617) | ALDH1A3 | 13.39092055 | 4.49381883 | 7.54621E-08 |
| [ENSCAFG00000018091](http://www.ensembl.org/id/ENSCAFG00000018091) | SYNPO | 13.37705341 | 1.604624638 | 0.000794475 |
| [ENSCAFG00000008723](http://www.ensembl.org/id/ENSCAFG00000008723) | SPI1 | 13.35630756 | 3.176256456 | 3.04432E-09 |
| [ENSCAFG00000017283](http://www.ensembl.org/id/ENSCAFG00000017283) | TIPIN | 13.32130073 | 1.429492502 | 0.010360352 |
| [ENSCAFG00000002796](http://www.ensembl.org/id/ENSCAFG00000002796) | CCDC88A | 13.31734902 | 2.719819836 | 1.65162E-08 |
| [ENSCAFG00000016055](http://www.ensembl.org/id/ENSCAFG00000016055) | ITPKB | 13.30781081 | 1.098295289 | 0.027579325 |
| [ENSCAFG00000008761](http://www.ensembl.org/id/ENSCAFG00000008761) | CX3CL1 | 13.30565509 | 1.38555272 | 0.038474885 |
| [ENSCAFG00000018936](http://www.ensembl.org/id/ENSCAFG00000018936) | MAP7D3 | 13.30224812 | 1.615898916 | 0.000390079 |
| [ENSCAFG00000005570](http://www.ensembl.org/id/ENSCAFG00000005570) | LMCD1 | 13.29800102 | 1.49129739 | 0.015023642 |
| [ENSCAFG00000009809](http://www.ensembl.org/id/ENSCAFG00000009809) | PHACTR1 | 13.27407765 | 2.628583186 | 7.41725E-08 |
| [ENSCAFG00000030120](http://www.ensembl.org/id/ENSCAFG00000030120) | CSPG4 | 13.268411 | 3.504989352 | 3.76723E-09 |
| [ENSCAFG00000010838](http://www.ensembl.org/id/ENSCAFG00000010838) | TRIP13 | 13.26505864 | 1.55784771 | 0.003921821 |
| [ENSCAFG00000019194](http://www.ensembl.org/id/ENSCAFG00000019194) | SLC43A2 | 13.25101631 | 2.15296664 | 6.17467E-05 |
| [ENSCAFG00000006200](http://www.ensembl.org/id/ENSCAFG00000006200) | PLXNC1 | 13.25082855 | 3.741687776 | 2.91359E-11 |
| [ENSCAFG00000003952](http://www.ensembl.org/id/ENSCAFG00000003952) | PRKAR2B | 13.25025048 | 1.929889906 | 0.000115518 |
| [ENSCAFG00000012903](http://www.ensembl.org/id/ENSCAFG00000012903) | RUNX3 | 13.24629468 | 3.730023224 | 0 |
| [ENSCAFG00000002390](http://www.ensembl.org/id/ENSCAFG00000002390) | FAM178B | 13.20160425 | 6.023586124 | 0 |
| [ENSCAFG00000007541](http://www.ensembl.org/id/ENSCAFG00000007541) | MRAS | 13.18595497 | 2.924579548 | 1.72877E-08 |
| [ENSCAFG00000002962](http://www.ensembl.org/id/ENSCAFG00000002962) | COX18 | 13.17321531 | 1.333303044 | 0.037253698 |
| [ENSCAFG00000004723](http://www.ensembl.org/id/ENSCAFG00000004723) | KCNN4 | 13.15268971 | 3.480847324 | 2.35796E-12 |
| [ENSCAFG00000030111](http://www.ensembl.org/id/ENSCAFG00000030111) | NCALD | 13.12756135 | 2.742950489 | 5.33546E-07 |
| [ENSCAFG00000010160](http://www.ensembl.org/id/ENSCAFG00000010160) | TPMT | 13.07302388 | 1.459919175 | 0.013069516 |
| [ENSCAFG00000005334](http://www.ensembl.org/id/ENSCAFG00000005334) | GPR180 | 13.04849669 | 3.694459336 | 7.79464E-11 |
| [ENSCAFG00000006294](http://www.ensembl.org/id/ENSCAFG00000006294) | STARD13 | 13.03893297 | 1.893749816 | 0.000361013 |
| [ENSCAFG00000006766](http://www.ensembl.org/id/ENSCAFG00000006766) | DLC1 | 13.03011423 | 2.298445397 | 5.00259E-07 |
| [ENSCAFG00000005014](http://www.ensembl.org/id/ENSCAFG00000005014) | TGFB1 | 13.02490774 | 1.047362106 | 0.035055242 |
| [ENSCAFG00000019956](http://www.ensembl.org/id/ENSCAFG00000019956) | WFDC1 | 13.02482819 | 2.478485503 | 0.000200919 |
| [ENSCAFG00000008601](http://www.ensembl.org/id/ENSCAFG00000008601) | SH2B3 | 13.01907438 | 1.658027038 | 0.000155959 |
| [ENSCAFG00000024809](http://www.ensembl.org/id/ENSCAFG00000024809) | TCFL5 | 13.01777018 | 3.220673938 | 3.97913E-06 |
| [ENSCAFG00000023556](http://www.ensembl.org/id/ENSCAFG00000023556) | OAS1 | 12.98659914 | 1.308580882 | 0.047594478 |
| [ENSCAFG00000004865](http://www.ensembl.org/id/ENSCAFG00000004865) | SMARCD3 | 12.95666575 | 2.522996741 | 2.95854E-06 |
| [ENSCAFG00000017159](http://www.ensembl.org/id/ENSCAFG00000017159) | RNASEH2A | 12.94230296 | 1.196786795 | 0.023235176 |
| [ENSCAFG00000010431](http://www.ensembl.org/id/ENSCAFG00000010431) | CACNA2D2 | 12.88836734 | 3.94025303 | 4.06472E-11 |
| [ENSCAFG00000007950](http://www.ensembl.org/id/ENSCAFG00000007950) | MAP1B | 12.87277665 | 3.03501934 | 8.83643E-06 |
| [ENSCAFG00000000988](http://www.ensembl.org/id/ENSCAFG00000000988) | NAGA | 12.79964641 | 1.444113437 | 0.002632972 |
| [ENSCAFG00000011399](http://www.ensembl.org/id/ENSCAFG00000011399) | RASSF8 | 12.79175896 | 1.97558081 | 0.003331836 |
| [ENSCAFG00000006673](http://www.ensembl.org/id/ENSCAFG00000006673) | PPP1R3B | 12.78895843 | 3.011023054 | 3.23121E-06 |
| [ENSCAFG00000012256](http://www.ensembl.org/id/ENSCAFG00000012256) | GOLT1B | 12.71672741 | 1.383192912 | 0.002389405 |
| [ENSCAFG00000018934](http://www.ensembl.org/id/ENSCAFG00000018934) | UHRF1 | 12.67125585 | 2.119556989 | 2.5086E-06 |
| [ENSCAFG00000024869](http://www.ensembl.org/id/ENSCAFG00000024869) | ADAMDEC1 | 12.63652635 | 8.727751785 | 7.17728E-11 |
| [ENSCAFG00000015789](http://www.ensembl.org/id/ENSCAFG00000015789) | CEP170 | 12.62090457 | 2.832264222 | 3.38458E-10 |
| [ENSCAFG00000000412](http://www.ensembl.org/id/ENSCAFG00000000412) | MDM1 | 12.60241381 | 2.469083552 | 0.019226441 |
| [ENSCAFG00000009105](http://www.ensembl.org/id/ENSCAFG00000009105) | FAM92A | 12.59570501 | 2.063260508 | 0.000300684 |
| [ENSCAFG00000008312](http://www.ensembl.org/id/ENSCAFG00000008312) | HPS3 | 12.56106346 | 1.970687065 | 1.65694E-05 |
| [ENSCAFG00000012217](http://www.ensembl.org/id/ENSCAFG00000012217) | TRAK2 | 12.53027458 | 1.553949404 | 0.001523659 |
| [ENSCAFG00000012018](http://www.ensembl.org/id/ENSCAFG00000012018) | P4HTM | 12.52638833 | 2.335724629 | 7.83351E-05 |
| [ENSCAFG00000017728](http://www.ensembl.org/id/ENSCAFG00000017728) | CDR2 | 12.49706631 | 3.167498659 | 3.06727E-09 |
| [ENSCAFG00000019861](http://www.ensembl.org/id/ENSCAFG00000019861) | GALNS | 12.47834479 | 1.373817798 | 0.041499238 |
| [ENSCAFG00000009282](http://www.ensembl.org/id/ENSCAFG00000009282) | CREB3L1 | 12.44374054 | 1.399013295 | 0.048359602 |
| [ENSCAFG00000012114](http://www.ensembl.org/id/ENSCAFG00000012114) | RHBDD3 | 12.44238771 | 1.421223813 | 0.036790645 |
| [ENSCAFG00000003621](http://www.ensembl.org/id/ENSCAFG00000003621) | LPIN1 | 12.38201448 | 2.802056409 | 7.9465E-05 |
| [ENSCAFG00000008382](http://www.ensembl.org/id/ENSCAFG00000008382) | FAIM2 | 12.35893482 | 3.819184997 | 0.000743721 |
| [ENSCAFG00000010387](http://www.ensembl.org/id/ENSCAFG00000010387) | FAP | 12.31096812 | 2.131054452 | 0.001717741 |
| [ENSCAFG00000000065](http://www.ensembl.org/id/ENSCAFG00000000065) | GDF11 | 12.30694328 | 4.337278568 | 0 |
| [ENSCAFG00000018427](http://www.ensembl.org/id/ENSCAFG00000018427) | EMILIN2 | 12.29904073 | 3.329830319 | 0.002970109 |
| [ENSCAFG00000004666](http://www.ensembl.org/id/ENSCAFG00000004666) | PVR | 12.28444112 | 1.628998573 | 0.011892886 |
| [ENSCAFG00000013350](http://www.ensembl.org/id/ENSCAFG00000013350) | SIPA1 | 12.26126203 | 1.736646048 | 0.000103209 |
| [ENSCAFG00000014134](http://www.ensembl.org/id/ENSCAFG00000014134) | FZD2 | 12.24540935 | 5.15308087 | 0 |
| [ENSCAFG00000014523](http://www.ensembl.org/id/ENSCAFG00000014523) | ENO2 | 12.23832224 | 3.221574291 | 1.02176E-06 |
| [ENSCAFG00000004498](http://www.ensembl.org/id/ENSCAFG00000004498) | SSTR2 | 12.2202959 | 6.982818438 | 7.46697E-07 |
| [ENSCAFG00000023317](http://www.ensembl.org/id/ENSCAFG00000023317) | DUSP2 | 12.19340363 | 5.13315964 | 2.88241E-13 |
| [ENSCAFG00000001228](http://www.ensembl.org/id/ENSCAFG00000001228) | DENND3 | 12.18494447 | 1.96913907 | 5.41519E-06 |
| [ENSCAFG00000016600](http://www.ensembl.org/id/ENSCAFG00000016600) | CCNB2 | 12.18345218 | 1.636832003 | 0.010011278 |
| [ENSCAFG00000012155](http://www.ensembl.org/id/ENSCAFG00000012155) | LPGAT1 | 12.18341528 | 1.535792246 | 0.000529657 |
| [ENSCAFG00000016052](http://www.ensembl.org/id/ENSCAFG00000016052) | SLC29A4 | 12.18076913 | 4.446316631 | 1.86875E-09 |
| [ENSCAFG00000032756](http://www.ensembl.org/id/ENSCAFG00000032756) | FAM198B | 12.07652444 | 1.430533224 | 0.018026906 |
| [ENSCAFG00000011613](http://www.ensembl.org/id/ENSCAFG00000011613) | CMTM5 | 12.04100788 | 5.910890614 | 4.61846E-06 |
| [ENSCAFG00000003278](http://www.ensembl.org/id/ENSCAFG00000003278) | CDCA8 | 12.0295246 | 1.221069875 | 0.039307937 |
| [ENSCAFG00000015430](http://www.ensembl.org/id/ENSCAFG00000015430) | ABHD8 | 11.97445631 | 1.718814089 | 0.003311053 |
| [ENSCAFG00000013010](http://www.ensembl.org/id/ENSCAFG00000013010) | TBL2 | 11.9567106 | 1.538092443 | 0.012113601 |
| [ENSCAFG00000011401](http://www.ensembl.org/id/ENSCAFG00000011401) | KIRREL1 | 11.93587098 | 2.288325913 | 1.99866E-06 |
| [ENSCAFG00000011603](http://www.ensembl.org/id/ENSCAFG00000011603) | GRK3 | 11.84277613 | 2.183019094 | 1.859E-05 |
| [ENSCAFG00000004184](http://www.ensembl.org/id/ENSCAFG00000004184) | HEPHL1 | 11.81329338 | 5.912296437 | 5.40526E-09 |
| [ENSCAFG00000016147](http://www.ensembl.org/id/ENSCAFG00000016147) | SYDE1 | 11.78075929 | 2.493279595 | 2.16061E-07 |
| [ENSCAFG00000000886](http://www.ensembl.org/id/ENSCAFG00000000886) | DSE | 11.77106564 | 2.634848248 | 3.04432E-09 |
| [ENSCAFG00000004728](http://www.ensembl.org/id/ENSCAFG00000004728) | FRMD4A | 11.76437668 | 2.392221903 | 5.97019E-08 |
| [ENSCAFG00000004297](http://www.ensembl.org/id/ENSCAFG00000004297) | CCDC8 | 11.68738689 | 1.442579695 | 0.024693584 |
| [ENSCAFG00000016719](http://www.ensembl.org/id/ENSCAFG00000016719) | SFXN1 | 11.67616163 | 1.525141181 | 0.000488867 |
| [ENSCAFG00000005972](http://www.ensembl.org/id/ENSCAFG00000005972) | ALX1 | 11.66321125 | 3.892836775 | 9.90921E-10 |
| [ENSCAFG00000025231](http://www.ensembl.org/id/ENSCAFG00000025231) | GRASP | 11.63189426 | 1.8614866 | 0.000330404 |
| [ENSCAFG00000016426](http://www.ensembl.org/id/ENSCAFG00000016426) | SNX8 | 11.61392588 | 1.139737792 | 0.046430649 |
| [ENSCAFG00000014609](http://www.ensembl.org/id/ENSCAFG00000014609) | FERMT3 | 11.60716485 | 2.621213313 | 4.78871E-06 |
| [ENSCAFG00000032121](http://www.ensembl.org/id/ENSCAFG00000032121) | RBM38 | 11.59279 | 1.098889645 | 0.039815133 |
| [ENSCAFG00000012259](http://www.ensembl.org/id/ENSCAFG00000012259) | MAN2A2 | 11.5904359 | 1.763505393 | 0.000360061 |
| [ENSCAFG00000018465](http://www.ensembl.org/id/ENSCAFG00000018465) | PARP8 | 11.58639268 | 1.651832063 | 0.001272863 |
| [ENSCAFG00000011859](http://www.ensembl.org/id/ENSCAFG00000011859) | SPC25 | 11.56797983 | 1.440851576 | 0.030953702 |
| [ENSCAFG00000030611](http://www.ensembl.org/id/ENSCAFG00000030611) | MZT1 | 11.55343768 | 1.078980905 | 0.030761411 |
| [ENSCAFG00000006042](http://www.ensembl.org/id/ENSCAFG00000006042) | SLC23A2 | 11.54184158 | 2.518834655 | 3.31675E-07 |
| [ENSCAFG00000009409](http://www.ensembl.org/id/ENSCAFG00000009409) | ECI2 | 11.51726963 | 1.715405215 | 0.000276492 |
| [ENSCAFG00000016401](http://www.ensembl.org/id/ENSCAFG00000016401) | TMEM229B | 11.43929777 | 4.104033581 | 2.92115E-08 |
| [ENSCAFG00000010505](http://www.ensembl.org/id/ENSCAFG00000010505) | CCL20 | 11.43341812 | 2.767949919 | 0.039021581 |
| [ENSCAFG00000007163](http://www.ensembl.org/id/ENSCAFG00000007163) | NDUFAF2 | 11.40534568 | 1.769313324 | 0.015082247 |
| [ENSCAFG00000004682](http://www.ensembl.org/id/ENSCAFG00000004682) | FAM171A1 | 11.36732976 | 1.894336801 | 0.0006181 |
| [ENSCAFG00000005055](http://www.ensembl.org/id/ENSCAFG00000005055) | RNF157 | 11.36156593 | 2.224701085 | 1.09618E-07 |
| [ENSCAFG00000015105](http://www.ensembl.org/id/ENSCAFG00000015105) | BIRC3 | 11.34911672 | 2.865867912 | 1.22062E-06 |
| [ENSCAFG00000017160](http://www.ensembl.org/id/ENSCAFG00000017160) | IGDCC4 | 11.34726169 | 4.193349923 | 8.66135E-15 |
| [ENSCAFG00000010370](http://www.ensembl.org/id/ENSCAFG00000010370) | MS4A7 | 11.32327689 | 4.467772962 | 0 |
| [ENSCAFG00000005407](http://www.ensembl.org/id/ENSCAFG00000005407) | HOOK3 | 11.31740948 | 1.216391368 | 0.013102999 |
| [ENSCAFG00000016961](http://www.ensembl.org/id/ENSCAFG00000016961) | LCP2 | 11.29141431 | 3.105346664 | 4.09379E-08 |
| [ENSCAFG00000008351](http://www.ensembl.org/id/ENSCAFG00000008351) | TLR2 | 11.28686994 | 3.515486748 | 7.02743E-12 |
| [ENSCAFG00000009400](http://www.ensembl.org/id/ENSCAFG00000009400) | TP53I11 | 11.28617772 | 2.950290968 | 6.13664E-08 |
| [ENSCAFG00000019905](http://www.ensembl.org/id/ENSCAFG00000019905) | POMT1 | 11.26585773 | 1.309202166 | 0.011387851 |
| [ENSCAFG00000017366](http://www.ensembl.org/id/ENSCAFG00000017366) | KANK2 | 11.21737864 | 1.04345646 | 0.039941768 |
| [ENSCAFG00000004713](http://www.ensembl.org/id/ENSCAFG00000004713) | PLK3 | 11.19530322 | 1.793738778 | 0.00230974 |
| [ENSCAFG00000003730](http://www.ensembl.org/id/ENSCAFG00000003730) | GPX7 | 11.17042467 | 1.357118701 | 0.028840262 |
| [ENSCAFG00000014879](http://www.ensembl.org/id/ENSCAFG00000014879) | LRRC25 | 11.14632524 | 4.27104667 | 3.53298E-13 |
| [ENSCAFG00000013410](http://www.ensembl.org/id/ENSCAFG00000013410) | RGL1 | 11.13095927 | 1.540482206 | 0.007117434 |
| [ENSCAFG00000003174](http://www.ensembl.org/id/ENSCAFG00000003174) | DPY19L1 | 11.11873768 | 1.36347277 | 0.004603821 |
| [ENSCAFG00000008487](http://www.ensembl.org/id/ENSCAFG00000008487) | PDE3B | 11.07515531 | 2.282910655 | 1.89812E-05 |
| [ENSCAFG00000003369](http://www.ensembl.org/id/ENSCAFG00000003369) | PTN | 11.06189076 | 3.116350548 | 0.00116754 |
| [ENSCAFG00000011252](http://www.ensembl.org/id/ENSCAFG00000011252) | LEF1 | 11.03782832 | 2.612211686 | 9.13978E-07 |
| [ENSCAFG00000006848](http://www.ensembl.org/id/ENSCAFG00000006848) | TRIM44 | 11.03401179 | 1.838147945 | 0.000272992 |
| [ENSCAFG00000010761](http://www.ensembl.org/id/ENSCAFG00000010761) | TPST1 | 11.02713644 | 1.704891288 | 0.0027921 |
| [ENSCAFG00000018952](http://www.ensembl.org/id/ENSCAFG00000018952) | ARHGEF6 | 11.01925887 | 1.747032771 | 0.00079392 |
| [ENSCAFG00000019959](http://www.ensembl.org/id/ENSCAFG00000019959) | ADAD2 | 11.01274589 | 9.50331129 | 8.11988E-09 |
| [ENSCAFG00000020134](http://www.ensembl.org/id/ENSCAFG00000020134) | LRSAM1 | 11.0048285 | 1.861786371 | 0.00016962 |
| [ENSCAFG00000013735](http://www.ensembl.org/id/ENSCAFG00000013735) | GPIIIa | 10.98876361 | 2.522251116 | 0.00010809 |
| [ENSCAFG00000007170](http://www.ensembl.org/id/ENSCAFG00000007170) | PCCB | 10.98371919 | 1.125084071 | 0.020636423 |
| [ENSCAFG00000006089](http://www.ensembl.org/id/ENSCAFG00000006089) | SMOX | 10.95803242 | 2.395778967 | 5.20658E-06 |
| [ENSCAFG00000006072](http://www.ensembl.org/id/ENSCAFG00000006072) | RAB20 | 10.92147442 | 2.08915374 | 0.000175377 |
| [ENSCAFG00000016208](http://www.ensembl.org/id/ENSCAFG00000016208) | TBC1D1 | 10.82321962 | 1.424527057 | 0.002729981 |
| [ENSCAFG00000017702](http://www.ensembl.org/id/ENSCAFG00000017702) | ARMCX6 | 10.78439642 | 1.964387179 | 0.004326815 |
| [ENSCAFG00000004245](http://www.ensembl.org/id/ENSCAFG00000004245) | KIF3C | 10.75950713 | 3.128802258 | 1.72056E-12 |
| [ENSCAFG00000009810](http://www.ensembl.org/id/ENSCAFG00000009810) | JAM3 | 10.74749018 | 1.477460989 | 0.008891182 |
| [ENSCAFG00000001196](http://www.ensembl.org/id/ENSCAFG00000001196) | AGO2 | 10.71039197 | 1.226456611 | 0.039492453 |
| [ENSCAFG00000010934](http://www.ensembl.org/id/ENSCAFG00000010934) | RFTN2 | 10.69731477 | 1.695832577 | 0.012372043 |
| [ENSCAFG00000005873](http://www.ensembl.org/id/ENSCAFG00000005873) | RFTN1 | 10.66577066 | 1.439211153 | 0.02001453 |
| [ENSCAFG00000031894](http://www.ensembl.org/id/ENSCAFG00000031894) | FAM46A | 10.65526431 | 1.427509944 | 0.028999022 |
| [ENSCAFG00000003267](http://www.ensembl.org/id/ENSCAFG00000003267) | RGS3 | 10.64476063 | 2.564830576 | 2.27923E-08 |
| [ENSCAFG00000003991](http://www.ensembl.org/id/ENSCAFG00000003991) | ARHGAP42 | 10.63345747 | 1.390945651 | 0.00305963 |
| [ENSCAFG00000018666](http://www.ensembl.org/id/ENSCAFG00000018666) | EGFLAM | 10.62958086 | 2.682613615 | 0.000349412 |
| [ENSCAFG00000006560](http://www.ensembl.org/id/ENSCAFG00000006560) | NCAPH | 10.60126726 | 1.310389421 | 0.007655846 |
| [ENSCAFG00000001204](http://www.ensembl.org/id/ENSCAFG00000001204) | KIF20A | 10.56934069 | 1.856268328 | 0.000408545 |
| [ENSCAFG00000008898](http://www.ensembl.org/id/ENSCAFG00000008898) | PRKG2 | 10.55848366 | 2.463694978 | 0.001277113 |
| [ENSCAFG00000007232](http://www.ensembl.org/id/ENSCAFG00000007232) | NOL4L | 10.50641338 | 2.990881173 | 1.46525E-12 |
| [ENSCAFG00000019204](http://www.ensembl.org/id/ENSCAFG00000019204) | CDIP1 | 10.42969477 | 1.936670308 | 0.003611332 |
| [ENSCAFG00000002742](http://www.ensembl.org/id/ENSCAFG00000002742) | FAM126A | 10.42156417 | 1.61179888 | 0.013134414 |
| [ENSCAFG00000000765](http://www.ensembl.org/id/ENSCAFG00000000765) | AGPAT4 | 10.39407061 | 2.428565693 | 1.75164E-05 |
| [ENSCAFG00000009913](http://www.ensembl.org/id/ENSCAFG00000009913) | ADCY7 | 10.24022578 | 2.224389093 | 8.95402E-05 |
| [ENSCAFG00000011101](http://www.ensembl.org/id/ENSCAFG00000011101) | GPR137B | 10.23999919 | 1.68388838 | 0.002186023 |
| [ENSCAFG00000017469](http://www.ensembl.org/id/ENSCAFG00000017469) | CALML4 | 10.23553309 | 2.623562588 | 0.000634431 |
| [ENSCAFG00000018857](http://www.ensembl.org/id/ENSCAFG00000018857) | GPC4 | 10.22698646 | 2.51081436 | 6.91321E-06 |
| [ENSCAFG00000009855](http://www.ensembl.org/id/ENSCAFG00000009855) | PPM1M | 10.22469773 | 1.330032396 | 0.019333226 |
| [ENSCAFG00000005527](http://www.ensembl.org/id/ENSCAFG00000005527) | P4HA3 | 10.22036399 | 2.41690044 | 0.000115962 |
| [ENSCAFG00000009596](http://www.ensembl.org/id/ENSCAFG00000009596) | RUNX1 | 10.21900877 | 3.339028392 | 1.25189E-10 |
| [ENSCAFG00000006694](http://www.ensembl.org/id/ENSCAFG00000006694) | STX2 | 10.17913685 | 2.058361934 | 5.44595E-06 |
| [ENSCAFG00000019680](http://www.ensembl.org/id/ENSCAFG00000019680) | TMEM8A | 10.17198836 | 1.074617706 | 0.038452366 |
| [ENSCAFG00000001022](http://www.ensembl.org/id/ENSCAFG00000001022) | BAK1 | 10.1716484 | 2.342809971 | 5.11794E-06 |
| [ENSCAFG00000016956](http://www.ensembl.org/id/ENSCAFG00000016956) | KCNMB1 | 10.1615454 | 1.735377019 | 0.012333133 |
| [ENSCAFG00000009168](http://www.ensembl.org/id/ENSCAFG00000009168) | ARSB | 10.16020671 | 2.921511732 | 2.9689E-11 |
| [ENSCAFG00000017262](http://www.ensembl.org/id/ENSCAFG00000017262) | MYH10 | 10.11659358 | 2.136993187 | 0.000461859 |
| [ENSCAFG00000006713](http://www.ensembl.org/id/ENSCAFG00000006713) | APLP1 | 10.10778686 | 2.974813019 | 7.66368E-08 |
| [ENSCAFG00000003725](http://www.ensembl.org/id/ENSCAFG00000003725) | NOCT | 10.09027467 | 1.579004579 | 0.019143359 |
| [ENSCAFG00000007410](http://www.ensembl.org/id/ENSCAFG00000007410) | SNTA1 | 10.07103968 | 1.654968098 | 0.003255908 |
| [ENSCAFG00000024883](http://www.ensembl.org/id/ENSCAFG00000024883) | SOX4 | 10.06226742 | 3.430701857 | 2.65726E-09 |
| [ENSCAFG00000012817](http://www.ensembl.org/id/ENSCAFG00000012817) | ABI2 | 10.05851666 | 2.724817756 | 2.27964E-06 |
| [ENSCAFG00000028708](http://www.ensembl.org/id/ENSCAFG00000028708) | SCD5 | 10.04013684 | 1.965496349 | 0.000808232 |
| [ENSCAFG00000019953](http://www.ensembl.org/id/ENSCAFG00000019953) | NCS1 | 10.03923952 | 3.455373556 | 1.65924E-05 |
| [ENSCAFG00000017867](http://www.ensembl.org/id/ENSCAFG00000017867) | EML1 | 10.03488816 | 1.332312198 | 0.009972337 |
| [ENSCAFG00000003886](http://www.ensembl.org/id/ENSCAFG00000003886) | PLEKHA4 | 10.02461413 | 2.372383012 | 2.83769E-05 |
| [ENSCAFG00000010030](http://www.ensembl.org/id/ENSCAFG00000010030) | TMCC2 | 10.01264597 | 2.431589572 | 1.8505E-06 |
| [ENSCAFG00000000337](http://www.ensembl.org/id/ENSCAFG00000000337) | PPM1H | 10.01217333 | 2.690512164 | 8.32081E-08 |
| [ENSCAFG00000001004](http://www.ensembl.org/id/ENSCAFG00000001004) | WDYHV1 | 10.0070372 | 2.105845327 | 0.001392657 |
| [ENSCAFG00000005586](http://www.ensembl.org/id/ENSCAFG00000005586) | AP3M2 | 9.977248115 | 5.46377779 | 8.66135E-15 |
| [ENSCAFG00000011667](http://www.ensembl.org/id/ENSCAFG00000011667) | ETNK1 | 9.958465756 | 2.494197647 | 5.21496E-07 |
| [ENSCAFG00000009033](http://www.ensembl.org/id/ENSCAFG00000009033) | DYSF | 9.952963496 | 1.611456732 | 0.012799798 |
| [ENSCAFG00000015464](http://www.ensembl.org/id/ENSCAFG00000015464) | PIMREG | 9.947279545 | 5.215851631 | 2.46133E-14 |
| [ENSCAFG00000017484](http://www.ensembl.org/id/ENSCAFG00000017484) | CYFIP2 | 9.921158468 | 4.082743317 | 1.39434E-09 |
| [ENSCAFG00000017168](http://www.ensembl.org/id/ENSCAFG00000017168) | NGB | 9.915598998 | 4.765435303 | 1.89214E-05 |
| [ENSCAFG00000007010](http://www.ensembl.org/id/ENSCAFG00000007010) | RASSF4 | 9.906574823 | 2.101393961 | 0.000656397 |
| [ENSCAFG00000002543](http://www.ensembl.org/id/ENSCAFG00000002543) | PREPL | 9.89986913 | 1.135978242 | 0.034458598 |
| [ENSCAFG00000009258](http://www.ensembl.org/id/ENSCAFG00000009258) | CYTIP | 9.895800921 | 2.734950685 | 4.12936E-05 |
| [ENSCAFG00000020226](http://www.ensembl.org/id/ENSCAFG00000020226) | LHX2 | 9.883532234 | 8.238777511 | 2.34187E-10 |
| [ENSCAFG00000018590](http://www.ensembl.org/id/ENSCAFG00000018590) | VAV1 | 9.878038482 | 2.158310869 | 1.63861E-05 |
| [ENSCAFG00000005395](http://www.ensembl.org/id/ENSCAFG00000005395) | GDPD5 | 9.865306063 | 1.41123867 | 0.015005465 |
| [ENSCAFG00000010848](http://www.ensembl.org/id/ENSCAFG00000010848) | GAP43 | 9.860827455 | 5.596981892 | 1.17052E-05 |
| [ENSCAFG00000011651](http://www.ensembl.org/id/ENSCAFG00000011651) | THTPA | 9.857102737 | 1.895124749 | 0.005112146 |
| [ENSCAFG00000030262](http://www.ensembl.org/id/ENSCAFG00000030262) | BAMBI | 9.846085196 | 5.223841356 | 3.22992E-14 |
| [ENSCAFG00000020370](http://www.ensembl.org/id/ENSCAFG00000020370) | FHOD1 | 9.837354212 | 1.838284213 | 3.51613E-05 |
| [ENSCAFG00000010982](http://www.ensembl.org/id/ENSCAFG00000010982) | FAM20A | 9.835556519 | 2.641046188 | 0.000104542 |
| [ENSCAFG00000029396](http://www.ensembl.org/id/ENSCAFG00000029396) | BASP1 | 9.814448901 | 3.6898036 | 2.34488E-07 |
| [ENSCAFG00000004329](http://www.ensembl.org/id/ENSCAFG00000004329) | APBB1IP | 9.812497617 | 2.690038862 | 2.24104E-07 |
| [ENSCAFG00000018724](http://www.ensembl.org/id/ENSCAFG00000018724) | SPAG5 | 9.809559725 | 1.749966413 | 0.000630898 |
| [ENSCAFG00000020198](http://www.ensembl.org/id/ENSCAFG00000020198) | LRRC8C | 9.803851899 | 2.679573489 | 7.91543E-09 |
| [ENSCAFG00000001591](http://www.ensembl.org/id/ENSCAFG00000001591) | TREM1 | 9.770779828 | 6.844925637 | 3.22992E-14 |
| [ENSCAFG00000024205](http://www.ensembl.org/id/ENSCAFG00000024205) | CCL13 | 9.745170207 | 3.941174565 | 0.001899411 |
| [ENSCAFG00000024700](http://www.ensembl.org/id/ENSCAFG00000024700) | OOEP | 9.714574975 | 3.344729587 | 0.031467881 |
| [ENSCAFG00000018592](http://www.ensembl.org/id/ENSCAFG00000018592) | NF1 | 9.707225329 | 2.076586572 | 0.000120757 |
| [ENSCAFG00000017044](http://www.ensembl.org/id/ENSCAFG00000017044) | BATF | 9.648582318 | 3.078000349 | 1.26495E-06 |
| [ENSCAFG00000011874](http://www.ensembl.org/id/ENSCAFG00000011874) | DOK5 | 9.644779425 | 5.120629828 | 0 |
| [ENSCAFG00000017098](http://www.ensembl.org/id/ENSCAFG00000017098) | RBPMS2 | 9.620936452 | 2.57065415 | 0.007041454 |
| [ENSCAFG00000010910](http://www.ensembl.org/id/ENSCAFG00000010910) | FEZ1 | 9.608344742 | 2.562734256 | 0.000315872 |
| [ENSCAFG00000007206](http://www.ensembl.org/id/ENSCAFG00000007206) | KIF3B | 9.588541693 | 1.440364416 | 0.003560193 |
| [ENSCAFG00000010479](http://www.ensembl.org/id/ENSCAFG00000010479) | FAM118B | 9.534617153 | 1.807548333 | 0.000588011 |
| [ENSCAFG00000004396](http://www.ensembl.org/id/ENSCAFG00000004396) | HDAC11 | 9.524231445 | 1.966294961 | 0.001205023 |
| [ENSCAFG00000012003](http://www.ensembl.org/id/ENSCAFG00000012003) | LAT2 | 9.516661044 | 2.55665707 | 0.000183815 |
| [ENSCAFG00000002104](http://www.ensembl.org/id/ENSCAFG00000002104) | SGCE | 9.500690964 | 1.723100103 | 0.00124009 |
| [ENSCAFG00000017388](http://www.ensembl.org/id/ENSCAFG00000017388) | SMAD3 | 9.491371249 | 1.501097127 | 0.001534925 |
| [ENSCAFG00000006918](http://www.ensembl.org/id/ENSCAFG00000006918) | MAP3K12 | 9.481266648 | 1.906245578 | 0.000299488 |
| [ENSCAFG00000005560](http://www.ensembl.org/id/ENSCAFG00000005560) | FLRT3 | 9.441204579 | 4.315997828 | 2.02056E-13 |
| [ENSCAFG00000009259](http://www.ensembl.org/id/ENSCAFG00000009259) | SFRP5 | 9.433844528 | 3.20087733 | 0.018942062 |
| [ENSCAFG00000016917](http://www.ensembl.org/id/ENSCAFG00000016917) | SYT11 | 9.425549593 | 4.296038079 | 5.14323E-11 |
| [ENSCAFG00000009214](http://www.ensembl.org/id/ENSCAFG00000009214) | DCBLD2 | 9.383828217 | 2.397557402 | 9.29429E-07 |
| [ENSCAFG00000030060](http://www.ensembl.org/id/ENSCAFG00000030060) | MFAP3 | 9.375768195 | 1.012896403 | 0.034039575 |
| [ENSCAFG00000011650](http://www.ensembl.org/id/ENSCAFG00000011650) | INPP5D | 9.373891885 | 2.282305302 | 5.99935E-08 |
| [ENSCAFG00000015642](http://www.ensembl.org/id/ENSCAFG00000015642) | FOXM1 | 9.353443374 | 1.85937265 | 0.000853101 |
| [ENSCAFG00000003351](http://www.ensembl.org/id/ENSCAFG00000003351) | TMEM268 | 9.329600904 | 1.652080246 | 0.001382774 |
| [ENSCAFG00000013075](http://www.ensembl.org/id/ENSCAFG00000013075) | SH3KBP1 | 9.325973134 | 2.16142971 | 1.15382E-07 |
| [ENSCAFG00000020153](http://www.ensembl.org/id/ENSCAFG00000020153) | MTSS1L | 9.322686457 | 2.138314139 | 2.95651E-06 |
| [ENSCAFG00000029757](http://www.ensembl.org/id/ENSCAFG00000029757) | MMD | 9.317216093 | 1.48498771 | 0.007691415 |
| [ENSCAFG00000018439](http://www.ensembl.org/id/ENSCAFG00000018439) | ITGA1 | 9.312579527 | 1.811519313 | 0.000115964 |
| [ENSCAFG00000018163](http://www.ensembl.org/id/ENSCAFG00000018163) | CAMK2A | 9.31025107 | 3.633188212 | 1.48417E-11 |
| [ENSCAFG00000029394](http://www.ensembl.org/id/ENSCAFG00000029394) | HAS2 | 9.265106642 | 3.311545917 | 3.42575E-08 |
| [ENSCAFG00000030416](http://www.ensembl.org/id/ENSCAFG00000030416) | RGS16 | 9.259485114 | 2.827830515 | 1.85507E-05 |
| [ENSCAFG00000023986](http://www.ensembl.org/id/ENSCAFG00000023986) | TMEM121 | 9.257941581 | 2.666241243 | 7.56723E-05 |
| [ENSCAFG00000014098](http://www.ensembl.org/id/ENSCAFG00000014098) | C1RL | 9.246869019 | 1.294809569 | 0.00555978 |
| [ENSCAFG00000020172](http://www.ensembl.org/id/ENSCAFG00000020172) | MVB12B | 9.245247134 | 2.466059334 | 9.20894E-07 |
| [ENSCAFG00000015995](http://www.ensembl.org/id/ENSCAFG00000015995) | DLG4 | 9.204992393 | 2.504742503 | 1.91077E-06 |
| [ENSCAFG00000008618](http://www.ensembl.org/id/ENSCAFG00000008618) | DSN1 | 9.188344257 | 1.410278424 | 0.006390443 |
| [ENSCAFG00000010345](http://www.ensembl.org/id/ENSCAFG00000010345) | NECTIN3 | 9.153537092 | 2.554085604 | 3.97431E-06 |
| [ENSCAFG00000016362](http://www.ensembl.org/id/ENSCAFG00000016362) | TBC1D19 | 9.150303449 | 2.143422909 | 4.15333E-05 |
| [ENSCAFG00000011782](http://www.ensembl.org/id/ENSCAFG00000011782) | GFRA1 | 9.12470605 | 4.115776241 | 0.000233493 |
| [ENSCAFG00000011451](http://www.ensembl.org/id/ENSCAFG00000011451) | PITPNM1 | 9.100896171 | 1.067437266 | 0.030352477 |
| [ENSCAFG00000005913](http://www.ensembl.org/id/ENSCAFG00000005913) | NOTUM | 9.098243511 | 4.247689469 | 1.42889E-07 |
| [ENSCAFG00000001112](http://www.ensembl.org/id/ENSCAFG00000001112) | CHADL | 9.092110594 | 4.924546025 | 1.87875E-13 |
| [ENSCAFG00000016556](http://www.ensembl.org/id/ENSCAFG00000016556) | AQP9 | 9.066463169 | 7.391862967 | 3.24283E-11 |
| [ENSCAFG00000024835](http://www.ensembl.org/id/ENSCAFG00000024835) | RAB43 | 9.062994756 | 1.48810998 | 0.02745428 |
| [ENSCAFG00000008390](http://www.ensembl.org/id/ENSCAFG00000008390) | NCKAP5L | 9.045663939 | 1.057791121 | 0.028745394 |
| [ENSCAFG00000013440](http://www.ensembl.org/id/ENSCAFG00000013440) | ADAM8 | 9.028729258 | 3.781363965 | 4.68773E-12 |
| [ENSCAFG00000013252](http://www.ensembl.org/id/ENSCAFG00000013252) | NMNAT2 | 8.997273031 | 4.888630211 | 8.37033E-06 |
| [ENSCAFG00000009637](http://www.ensembl.org/id/ENSCAFG00000009637) | LGI3 | 8.992225594 | 3.127861732 | 0.000183808 |
| [ENSCAFG00000009385](http://www.ensembl.org/id/ENSCAFG00000009385) | CHST1 | 8.98641731 | 4.382483453 | 8.66135E-15 |
| [ENSCAFG00000007169](http://www.ensembl.org/id/ENSCAFG00000007169) | TTL | 8.985272567 | 1.10327775 | 0.021906737 |
| [ENSCAFG00000018846](http://www.ensembl.org/id/ENSCAFG00000018846) | SPIRE1 | 8.972098158 | 2.138526843 | 0.000178365 |
| [ENSCAFG00000014463](http://www.ensembl.org/id/ENSCAFG00000014463) | PTPN6 | 8.965517354 | 1.621550065 | 0.002761529 |
| [ENSCAFG00000001669](http://www.ensembl.org/id/ENSCAFG00000001669) | ARHGAP39 | 8.964636205 | 2.217562241 | 9.14053E-05 |
| [ENSCAFG00000001621](http://www.ensembl.org/id/ENSCAFG00000001621) | TONSL | 8.958875486 | 2.058840663 | 0.000523846 |
| [ENSCAFG00000032454](http://www.ensembl.org/id/ENSCAFG00000032454) | COL8A2 | 8.940308919 | 6.70697219 | 0 |
| [ENSCAFG00000010868](http://www.ensembl.org/id/ENSCAFG00000010868) | GPAM | 8.938350708 | 1.08038487 | 0.046990227 |
| [ENSCAFG00000023546](http://www.ensembl.org/id/ENSCAFG00000023546) | TCTN2 | 8.915516341 | 1.546203074 | 0.00477305 |
| [ENSCAFG00000018230](http://www.ensembl.org/id/ENSCAFG00000018230) | IL13RA2 | 8.909045869 | 2.270654896 | 0.00670375 |
| [ENSCAFG00000023212](http://www.ensembl.org/id/ENSCAFG00000023212) | ABCA2 | 8.908326278 | 1.204393894 | 0.044983567 |
| [ENSCAFG00000001498](http://www.ensembl.org/id/ENSCAFG00000001498) | MPDZ | 8.895712396 | 1.482488909 | 0.001107681 |
| [ENSCAFG00000024327](http://www.ensembl.org/id/ENSCAFG00000024327) | NOL3 | 8.83447193 | 2.433313314 | 0.000633956 |
| [ENSCAFG00000016070](http://www.ensembl.org/id/ENSCAFG00000016070) | DAGLA | 8.827622141 | 4.566873269 | 8.34703E-11 |
| [ENSCAFG00000018643](http://www.ensembl.org/id/ENSCAFG00000018643) | SLC25A23 | 8.81706957 | 1.514375051 | 0.018394508 |
| [ENSCAFG00000000484](http://www.ensembl.org/id/ENSCAFG00000000484) | STK3 | 8.779563009 | 1.108773103 | 0.022995794 |
| [ENSCAFG00000000873](http://www.ensembl.org/id/ENSCAFG00000000873) | KIAA1644 | 8.764134631 | 4.577419114 | 9.84493E-12 |
| [ENSCAFG00000012377](http://www.ensembl.org/id/ENSCAFG00000012377) | SLCO1C1 | 8.753589659 | 6.147237321 | 9.33167E-14 |
| [ENSCAFG00000019014](http://www.ensembl.org/id/ENSCAFG00000019014) | SEMA6B | 8.745937258 | 2.506101396 | 9.04992E-05 |
| [ENSCAFG00000001300](http://www.ensembl.org/id/ENSCAFG00000001300) | SLC35B4 | 8.681834688 | 1.199383407 | 0.041042252 |
| [ENSCAFG00000003662](http://www.ensembl.org/id/ENSCAFG00000003662) | TBC1D9 | 8.679437671 | 1.226299617 | 0.047474182 |
| [ENSCAFG00000001225](http://www.ensembl.org/id/ENSCAFG00000001225) | FAM53C | 8.656901518 | 1.545226718 | 0.000540003 |
| [ENSCAFG00000019423](http://www.ensembl.org/id/ENSCAFG00000019423) | FAM213B | 8.65314842 | 5.93345957 | 6.85922E-07 |
| [ENSCAFG00000002020](http://www.ensembl.org/id/ENSCAFG00000002020) | ENPP4 | 8.601295905 | 2.551176922 | 5.29282E-07 |
| [ENSCAFG00000010135](http://www.ensembl.org/id/ENSCAFG00000010135) | LUZP2 | 8.588101684 | 2.937239485 | 0.005837238 |
| [ENSCAFG00000006965](http://www.ensembl.org/id/ENSCAFG00000006965) | TRIB3 | 8.580817334 | 3.930470864 | 3.71501E-09 |
| [ENSCAFG00000014559](http://www.ensembl.org/id/ENSCAFG00000014559) | NIN | 8.576329051 | 1.779225218 | 0.000150595 |
| [ENSCAFG00000018207](http://www.ensembl.org/id/ENSCAFG00000018207) | CABLES1 | 8.575193029 | 1.426733035 | 0.007464542 |
| [ENSCAFG00000002947](http://www.ensembl.org/id/ENSCAFG00000002947) | PRSS35 | 8.572375996 | 2.738436173 | 0.00026088 |
| [ENSCAFG00000012175](http://www.ensembl.org/id/ENSCAFG00000012175) | SLC26A6 | 8.567638661 | 1.372065397 | 0.010843517 |
| [ENSCAFG00000000882](http://www.ensembl.org/id/ENSCAFG00000000882) | DSCC1 | 8.556055617 | 1.589065814 | 0.021561956 |
| [ENSCAFG00000006920](http://www.ensembl.org/id/ENSCAFG00000006920) | KCNIP3 | 8.554734627 | 4.0587531 | 3.16793E-06 |
| [ENSCAFG00000006510](http://www.ensembl.org/id/ENSCAFG00000006510) | EML4 | 8.547899888 | 1.015871846 | 0.046572084 |
| [ENSCAFG00000009254](http://www.ensembl.org/id/ENSCAFG00000009254) | GALNT5 | 8.526971935 | 4.038594244 | 6.48113E-06 |
| [ENSCAFG00000032508](http://www.ensembl.org/id/ENSCAFG00000032508) | VGLL3 | 8.524999062 | 2.43262865 | 0.006213519 |
| [ENSCAFG00000006047](http://www.ensembl.org/id/ENSCAFG00000006047) | LETM2 | 8.518655641 | 1.168260341 | 0.029967308 |
| [ENSCAFG00000012298](http://www.ensembl.org/id/ENSCAFG00000012298) | FES | 8.50376256 | 1.711880832 | 7.04091E-05 |
| [ENSCAFG00000015182](http://www.ensembl.org/id/ENSCAFG00000015182) | GLB1L | 8.464583552 | 1.347623217 | 0.038729659 |
| [ENSCAFG00000016542](http://www.ensembl.org/id/ENSCAFG00000016542) | CLCN6 | 8.4586209 | 1.285716743 | 0.007559678 |
| [ENSCAFG00000015047](http://www.ensembl.org/id/ENSCAFG00000015047) | IFFO1 | 8.454847248 | 1.567558483 | 0.006528039 |
| [ENSCAFG00000015813](http://www.ensembl.org/id/ENSCAFG00000015813) | PADI2 | 8.452687984 | 2.233891813 | 0.001306533 |
| [ENSCAFG00000002364](http://www.ensembl.org/id/ENSCAFG00000002364) | ADGRL3 | 8.45230019 | 3.788088684 | 2.38921E-12 |
| [ENSCAFG00000019714](http://www.ensembl.org/id/ENSCAFG00000019714) | SLC2A5 | 8.446994777 | 4.72594337 | 8.66135E-15 |
| [ENSCAFG00000019236](http://www.ensembl.org/id/ENSCAFG00000019236) | WDR81 | 8.443964573 | 1.289511364 | 0.047060322 |
| [ENSCAFG00000001966](http://www.ensembl.org/id/ENSCAFG00000001966) | SH3RF3 | 8.429441664 | 3.817325524 | 4.24083E-10 |
| [ENSCAFG00000002838](http://www.ensembl.org/id/ENSCAFG00000002838) | CFAP36 | 8.427461858 | 1.663028279 | 0.025158033 |
| [ENSCAFG00000008717](http://www.ensembl.org/id/ENSCAFG00000008717) | SLC39A13 | 8.425088509 | 1.345836356 | 0.019792724 |
| [ENSCAFG00000005243](http://www.ensembl.org/id/ENSCAFG00000005243) | LRRC32 | 8.423106774 | 2.678797806 | 5.63074E-05 |
| [ENSCAFG00000010228](http://www.ensembl.org/id/ENSCAFG00000010228) | C2CD2 | 8.384038682 | 1.313655769 | 0.024361877 |
| [ENSCAFG00000007502](http://www.ensembl.org/id/ENSCAFG00000007502) | HHEX | 8.360780442 | 1.794022356 | 0.006038985 |
| [ENSCAFG00000016106](http://www.ensembl.org/id/ENSCAFG00000016106) | CDC6 | 8.358735246 | 2.338007307 | 8.04556E-06 |
| [ENSCAFG00000030541](http://www.ensembl.org/id/ENSCAFG00000030541) | PDZRN3 | 8.346289524 | 4.293455462 | 0 |
| [ENSCAFG00000015905](http://www.ensembl.org/id/ENSCAFG00000015905) | ARRB2 | 8.337602185 | 1.687619304 | 0.00143529 |
| [ENSCAFG00000013052](http://www.ensembl.org/id/ENSCAFG00000013052) | TANC2 | 8.289123198 | 2.159402843 | 0.000298742 |
| [ENSCAFG00000018623](http://www.ensembl.org/id/ENSCAFG00000018623) | EVI2B | 8.287647336 | 2.748695767 | 1.11276E-06 |
| [ENSCAFG00000018877](http://www.ensembl.org/id/ENSCAFG00000018877) | NPR3 | 8.276185248 | 2.93761934 | 0.000484215 |
| [ENSCAFG00000003704](http://www.ensembl.org/id/ENSCAFG00000003704) | SHCBP1 | 8.270254038 | 1.78427519 | 0.007294829 |
| [ENSCAFG00000008607](http://www.ensembl.org/id/ENSCAFG00000008607) | SOX6 | 8.265632979 | 1.887063884 | 0.017441277 |
| [ENSCAFG00000000677](http://www.ensembl.org/id/ENSCAFG00000000677) | LRP12 | 8.255844195 | 1.143295182 | 0.037963785 |
| [ENSCAFG00000003727](http://www.ensembl.org/id/ENSCAFG00000003727) | MGARP | 8.24797421 | 1.999184937 | 0.003226322 |
| [ENSCAFG00000009487](http://www.ensembl.org/id/ENSCAFG00000009487) | ENTPD7 | 8.234408963 | 1.627794802 | 0.003301698 |
| [ENSCAFG00000013259](http://www.ensembl.org/id/ENSCAFG00000013259) | NUF2 | 8.211495468 | 2.053483716 | 0.00016441 |
| [ENSCAFG00000018703](http://www.ensembl.org/id/ENSCAFG00000018703) | SASH3 | 8.184413336 | 2.046081533 | 0.000237639 |
| [ENSCAFG00000009001](http://www.ensembl.org/id/ENSCAFG00000009001) | DOCK5 | 8.169559472 | 2.242181223 | 7.45581E-05 |
| [ENSCAFG00000017712](http://www.ensembl.org/id/ENSCAFG00000017712) | IGSF6 | 8.15670671 | 2.959774778 | 4.13414E-05 |
| [ENSCAFG00000011175](http://www.ensembl.org/id/ENSCAFG00000011175) | NKAIN1 | 8.135340833 | 2.701094635 | 4.35176E-08 |
| [ENSCAFG00000019076](http://www.ensembl.org/id/ENSCAFG00000019076) | CTIF | 8.119010761 | 1.273980747 | 0.008714697 |
| [ENSCAFG00000023455](http://www.ensembl.org/id/ENSCAFG00000023455) | HAVCR1 | 8.115505946 | 2.565450426 | 2.38314E-06 |
| [ENSCAFG00000016039](http://www.ensembl.org/id/ENSCAFG00000016039) | PSEN2 | 8.098774107 | 2.398341641 | 2.88072E-06 |
| [ENSCAFG00000006413](http://www.ensembl.org/id/ENSCAFG00000006413) | NCKAP1L | 8.066786678 | 2.158688904 | 7.15985E-05 |
| [ENSCAFG00000001356](http://www.ensembl.org/id/ENSCAFG00000001356) | PDGFB | 8.062315706 | 1.93006149 | 1.24966E-05 |
| [ENSCAFG00000006046](http://www.ensembl.org/id/ENSCAFG00000006046) | COL6A5 | 8.048259604 | 11.30527806 | 9.18602E-11 |
| [ENSCAFG00000020318](http://www.ensembl.org/id/ENSCAFG00000020318) | PLA2G15 | 7.995905399 | 1.325025854 | 0.012363194 |
| [ENSCAFG00000003709](http://www.ensembl.org/id/ENSCAFG00000003709) | CD37 | 7.983177079 | 2.305353329 | 0.000486272 |
| [ENSCAFG00000018166](http://www.ensembl.org/id/ENSCAFG00000018166) | ALDH3A2 | 7.967048508 | 1.25323559 | 0.014168223 |
| [ENSCAFG00000004840](http://www.ensembl.org/id/ENSCAFG00000004840) | INHBB | 7.965297198 | 3.222711317 | 9.61346E-05 |
| [ENSCAFG00000018419](http://www.ensembl.org/id/ENSCAFG00000018419) | SEPT6 | 7.959460512 | 1.771793283 | 0.000840992 |
| [ENSCAFG00000013844](http://www.ensembl.org/id/ENSCAFG00000013844) | NCAM1 | 7.942417585 | 3.830769777 | 2.96462E-06 |
| [ENSCAFG00000009324](http://www.ensembl.org/id/ENSCAFG00000009324) | LOXL4 | 7.938710353 | 2.593844062 | 0.001728772 |
| [ENSCAFG00000024140](http://www.ensembl.org/id/ENSCAFG00000024140) | SMIM3 | 7.901965733 | 3.938572814 | 0.001591112 |
| [ENSCAFG00000006745](http://www.ensembl.org/id/ENSCAFG00000006745) | PRAG1 | 7.900475298 | 3.741802875 | 8.44988E-12 |
| [ENSCAFG00000031392](http://www.ensembl.org/id/ENSCAFG00000031392) | PRR7 | 7.888831224 | 1.905803211 | 0.000212232 |
| [ENSCAFG00000031859](http://www.ensembl.org/id/ENSCAFG00000031859) | FKBP7 | 7.882242656 | 2.941558165 | 7.63766E-08 |
| [ENSCAFG00000003941](http://www.ensembl.org/id/ENSCAFG00000003941) | SPATA6 | 7.876562843 | 2.637432483 | 4.86766E-05 |
| [ENSCAFG00000016563](http://www.ensembl.org/id/ENSCAFG00000016563) | GALNT16 | 7.827374223 | 1.713367722 | 0.006687735 |
| [ENSCAFG00000000244](http://www.ensembl.org/id/ENSCAFG00000000244) | MTFR2 | 7.813566685 | 1.433701458 | 0.027362965 |
| [ENSCAFG00000013414](http://www.ensembl.org/id/ENSCAFG00000013414) | ADAM23 | 7.795057147 | 2.301186282 | 0.004831678 |
| [ENSCAFG00000006215](http://www.ensembl.org/id/ENSCAFG00000006215) | POLE | 7.776530081 | 1.290251388 | 0.027031336 |
| [ENSCAFG00000003758](http://www.ensembl.org/id/ENSCAFG00000003758) | PCDH18 | 7.734253663 | 1.587877859 | 0.000516775 |
| [ENSCAFG00000000140](http://www.ensembl.org/id/ENSCAFG00000000140) | TCF4 | 7.726676917 | 1.635424789 | 0.011767112 |
| [ENSCAFG00000015918](http://www.ensembl.org/id/ENSCAFG00000015918) | RAB3IL1 | 7.715163065 | 1.315509108 | 0.021704029 |
| [ENSCAFG00000016231](http://www.ensembl.org/id/ENSCAFG00000016231) | FUT8 | 7.707876155 | 1.327228709 | 0.008469934 |
| [ENSCAFG00000020133](http://www.ensembl.org/id/ENSCAFG00000020133) | BCAR3 | 7.699066588 | 3.130596362 | 1.27454E-07 |
| [ENSCAFG00000010858](http://www.ensembl.org/id/ENSCAFG00000010858) | LSAMP | 7.698389939 | 3.511808168 | 1.06748E-06 |
| [ENSCAFG00000014002](http://www.ensembl.org/id/ENSCAFG00000014002) | H2AFY2 | 7.670408997 | 2.986627037 | 9.85264E-05 |
| [ENSCAFG00000030814](http://www.ensembl.org/id/ENSCAFG00000030814) | DOC2B | 7.657178756 | 1.161606386 | 0.034884278 |
| [ENSCAFG00000019780](http://www.ensembl.org/id/ENSCAFG00000019780) | SLC2A6 | 7.656551098 | 4.848285143 | 0 |
| [ENSCAFG00000004531](http://www.ensembl.org/id/ENSCAFG00000004531) | SLC25A30 | 7.641281241 | 1.517911819 | 0.006360986 |
| [ENSCAFG00000005112](http://www.ensembl.org/id/ENSCAFG00000005112) | CYGB | 7.634256337 | 1.726599095 | 0.002880042 |
| [ENSCAFG00000019372](http://www.ensembl.org/id/ENSCAFG00000019372) | CCNF | 7.624106749 | 1.420028849 | 0.027422869 |
| [ENSCAFG00000016699](http://www.ensembl.org/id/ENSCAFG00000016699) | FGFRL1 | 7.622973486 | 4.214255443 | 7.80381E-08 |
| [ENSCAFG00000011537](http://www.ensembl.org/id/ENSCAFG00000011537) | CLCN4 | 7.612827512 | 1.473185553 | 0.005083319 |
| [ENSCAFG00000017745](http://www.ensembl.org/id/ENSCAFG00000017745) | TBX2 | 7.611471021 | 3.271205878 | 2.99191E-10 |
| [ENSCAFG00000030400](http://www.ensembl.org/id/ENSCAFG00000030400) | TNFSF9 | 7.610733382 | 5.475211044 | 0 |
| [ENSCAFG00000002610](http://www.ensembl.org/id/ENSCAFG00000002610) | PRKCE | 7.603938482 | 1.694775679 | 0.004188397 |
| [ENSCAFG00000030473](http://www.ensembl.org/id/ENSCAFG00000030473) | TGIF2 | 7.591225261 | 2.039726988 | 8.37033E-06 |
| [ENSCAFG00000032102](http://www.ensembl.org/id/ENSCAFG00000032102) | DLA-DMB | 7.587764766 | 1.732639565 | 0.004992834 |
| [ENSCAFG00000004457](http://www.ensembl.org/id/ENSCAFG00000004457) | CENPA | 7.539431711 | 2.016724858 | 0.004058353 |
| [ENSCAFG00000012716](http://www.ensembl.org/id/ENSCAFG00000012716) | ARHGAP30 | 7.520847993 | 1.687779823 | 0.000528844 |
| [ENSCAFG00000011899](http://www.ensembl.org/id/ENSCAFG00000011899) | HJURP | 7.520588022 | 1.308021125 | 0.036742862 |
| [ENSCAFG00000000594](http://www.ensembl.org/id/ENSCAFG00000000594) | MARCH3 | 7.501584095 | 2.993617826 | 8.94003E-09 |
| [ENSCAFG00000018451](http://www.ensembl.org/id/ENSCAFG00000018451) | RASD1 | 7.501579953 | 3.711108982 | 0.000229674 |
| [ENSCAFG00000007540](http://www.ensembl.org/id/ENSCAFG00000007540) | MPPED2 | 7.498317238 | 3.105148299 | 0.000244427 |
| [ENSCAFG00000015009](http://www.ensembl.org/id/ENSCAFG00000015009) | MAST3 | 7.49600205 | 1.45493232 | 0.004780911 |
| [ENSCAFG00000029203](http://www.ensembl.org/id/ENSCAFG00000029203) | EIF5A2 | 7.475520087 | 1.564139107 | 0.00025134 |
| [ENSCAFG00000015930](http://www.ensembl.org/id/ENSCAFG00000015930) | RGR | 7.475156507 | 6.181624451 | 2.29073E-08 |
| [ENSCAFG00000031014](http://www.ensembl.org/id/ENSCAFG00000031014) | FAM180A | 7.474576984 | 1.978350992 | 0.023209309 |
| [ENSCAFG00000015026](http://www.ensembl.org/id/ENSCAFG00000015026) | DLGAP5 | 7.457467913 | 1.227414703 | 0.029967308 |
| [ENSCAFG00000029579](http://www.ensembl.org/id/ENSCAFG00000029579) | ZNF70 | 7.440761548 | 1.795689548 | 0.004494512 |
| [ENSCAFG00000010082](http://www.ensembl.org/id/ENSCAFG00000010082) | CDK18 | 7.37345714 | 3.471135931 | 1.02586E-07 |
| [ENSCAFG00000000234](http://www.ensembl.org/id/ENSCAFG00000000234) | AHI1 | 7.370038741 | 1.916816924 | 7.29546E-05 |
| [ENSCAFG00000011620](http://www.ensembl.org/id/ENSCAFG00000011620) | FANCI | 7.365161639 | 1.82795361 | 0.003096529 |
| [ENSCAFG00000010238](http://www.ensembl.org/id/ENSCAFG00000010238) | ADCY2 | 7.362861102 | 3.232672439 | 6.8788E-06 |
| [ENSCAFG00000007860](http://www.ensembl.org/id/ENSCAFG00000007860) | CSRNP2 | 7.359880582 | 1.289755713 | 0.018817187 |
| [ENSCAFG00000014945](http://www.ensembl.org/id/ENSCAFG00000014945) | RAB3A | 7.35213856 | 1.869221674 | 0.027575384 |
| [ENSCAFG00000000699](http://www.ensembl.org/id/ENSCAFG00000000699) | PANX2 | 7.337664701 | 2.655410226 | 3.18646E-06 |
| [ENSCAFG00000019218](http://www.ensembl.org/id/ENSCAFG00000019218) | C19orf71 | 7.337110324 | 1.612668805 | 0.041949456 |
| [ENSCAFG00000019030](http://www.ensembl.org/id/ENSCAFG00000019030) | ABAT | 7.31638618 | 1.299949508 | 0.040459676 |
| [ENSCAFG00000009145](http://www.ensembl.org/id/ENSCAFG00000009145) | CHST14 | 7.315152821 | 1.464101874 | 0.034159084 |
| [ENSCAFG00000003864](http://www.ensembl.org/id/ENSCAFG00000003864) | CLEC5A | 7.314724025 | 5.990992707 | 2.39868E-08 |
| [ENSCAFG00000014860](http://www.ensembl.org/id/ENSCAFG00000014860) | CASP4 | 7.27662102 | 2.249224544 | 0.000315872 |
| [ENSCAFG00000011868](http://www.ensembl.org/id/ENSCAFG00000011868) | PCK2 | 7.210232856 | 2.275927787 | 5.95091E-05 |
| [ENSCAFG00000020398](http://www.ensembl.org/id/ENSCAFG00000020398) | PDP2 | 7.189589731 | 1.134849955 | 0.049462694 |
| [ENSCAFG00000032668](http://www.ensembl.org/id/ENSCAFG00000032668) | SPOCK1 | 7.170998175 | 3.06992605 | 0.039199755 |
| [ENSCAFG00000000159](http://www.ensembl.org/id/ENSCAFG00000000159) | NEMP1 | 7.163751109 | 1.339096866 | 0.002813406 |
| [ENSCAFG00000014685](http://www.ensembl.org/id/ENSCAFG00000014685) | SUCO | 7.109183945 | 1.108053147 | 0.037320867 |
| [ENSCAFG00000018540](http://www.ensembl.org/id/ENSCAFG00000018540) | MYO1F | 7.104947523 | 3.214017252 | 1.0554E-09 |
| [ENSCAFG00000019247](http://www.ensembl.org/id/ENSCAFG00000019247) | ABCD1 | 7.075344819 | 2.250046398 | 1.60606E-05 |
| [ENSCAFG00000013778](http://www.ensembl.org/id/ENSCAFG00000013778) | PLA2G4A | 7.062776812 | 1.617308255 | 0.005346284 |
| [ENSCAFG00000000273](http://www.ensembl.org/id/ENSCAFG00000000273) | AGAP2 | 7.047572434 | 3.84021628 | 1.83944E-08 |
| [ENSCAFG00000005365](http://www.ensembl.org/id/ENSCAFG00000005365) | DGAT2 | 7.034982975 | 1.552197354 | 0.037278241 |
| [ENSCAFG00000001898](http://www.ensembl.org/id/ENSCAFG00000001898) | CDK14 | 7.030746953 | 2.469567068 | 1.14592E-05 |
| [ENSCAFG00000006052](http://www.ensembl.org/id/ENSCAFG00000006052) | RASSF2 | 7.030030318 | 1.998118457 | 0.002454504 |
| [ENSCAFG00000018348](http://www.ensembl.org/id/ENSCAFG00000018348) | CCL7 | 7.018432954 | 4.956007503 | 0.00133044 |
| [ENSCAFG00000010221](http://www.ensembl.org/id/ENSCAFG00000010221) | SUFU | 6.998500206 | 1.322311909 | 0.044831098 |
| [ENSCAFG00000009293](http://www.ensembl.org/id/ENSCAFG00000009293) | IQGAP2 | 6.996438117 | 1.700134506 | 0.001672792 |
| [ENSCAFG00000016354](http://www.ensembl.org/id/ENSCAFG00000016354) | STIM2 | 6.994974126 | 1.140708094 | 0.010920536 |
| [ENSCAFG00000014083](http://www.ensembl.org/id/ENSCAFG00000014083) | ADAMTS14 | 6.993008704 | 5.635543041 | 8.88312E-12 |
| [ENSCAFG00000000019](http://www.ensembl.org/id/ENSCAFG00000000019) | ZNF516 | 6.980311707 | 1.093243195 | 0.049209257 |
| [ENSCAFG00000001221](http://www.ensembl.org/id/ENSCAFG00000001221) | PACSIN1 | 6.953984521 | 2.502505462 | 3.31158E-08 |
| [ENSCAFG00000007870](http://www.ensembl.org/id/ENSCAFG00000007870) | DCLK2 | 6.945782848 | 1.723177278 | 0.000697924 |
| [ENSCAFG00000009363](http://www.ensembl.org/id/ENSCAFG00000009363) | MAPK8IP1 | 6.924408792 | 1.411123305 | 0.020022214 |
| [ENSCAFG00000001865](http://www.ensembl.org/id/ENSCAFG00000001865) | TJAP1 | 6.910076101 | 1.496046671 | 0.001649261 |
| [ENSCAFG00000004770](http://www.ensembl.org/id/ENSCAFG00000004770) | KIF2C | 6.90383823 | 1.68848713 | 0.005119542 |
| [ENSCAFG00000008933](http://www.ensembl.org/id/ENSCAFG00000008933) | NLRC5 | 6.87643466 | 1.504306636 | 0.008559148 |
| [ENSCAFG00000013314](http://www.ensembl.org/id/ENSCAFG00000013314) | NCF2 | 6.863141563 | 3.02898681 | 1.70425E-07 |
| [ENSCAFG00000011275](http://www.ensembl.org/id/ENSCAFG00000011275) | MARK1 | 6.854318667 | 2.128117423 | 0.000409003 |
| [ENSCAFG00000018073](http://www.ensembl.org/id/ENSCAFG00000018073) | PSTPIP1 | 6.823546815 | 1.481464486 | 0.023534363 |
| [ENSCAFG00000023094](http://www.ensembl.org/id/ENSCAFG00000023094) | MYH3 | 6.812142507 | 4.539004841 | 0.029215267 |
| [ENSCAFG00000004824](http://www.ensembl.org/id/ENSCAFG00000004824) | MEGF8 | 6.79974398 | 1.461725602 | 0.009803224 |
| [ENSCAFG00000001929](http://www.ensembl.org/id/ENSCAFG00000001929) | SLC41A2 | 6.794719113 | 2.644365943 | 4.03742E-07 |
| [ENSCAFG00000014112](http://www.ensembl.org/id/ENSCAFG00000014112) | KIF15 | 6.777815085 | 1.421933686 | 0.019792724 |
| [ENSCAFG00000015431](http://www.ensembl.org/id/ENSCAFG00000015431) | DACT1 | 6.776173443 | 2.126438876 | 0.000378282 |
| [ENSCAFG00000003916](http://www.ensembl.org/id/ENSCAFG00000003916) | KLHL29 | 6.774780629 | 1.374539758 | 0.043064992 |
| [ENSCAFG00000019574](http://www.ensembl.org/id/ENSCAFG00000019574) | ACOT7 | 6.770210773 | 2.130394742 | 0.001675992 |
| [ENSCAFG00000002049](http://www.ensembl.org/id/ENSCAFG00000002049) | RUSC2 | 6.746384839 | 1.384930365 | 0.005083319 |
| [ENSCAFG00000007062](http://www.ensembl.org/id/ENSCAFG00000007062) | BUB1 | 6.738399757 | 1.348952864 | 0.00923777 |
| [ENSCAFG00000015342](http://www.ensembl.org/id/ENSCAFG00000015342) | RAD51AP1 | 6.734473889 | 1.861270821 | 0.004530825 |
| [ENSCAFG00000019735](http://www.ensembl.org/id/ENSCAFG00000019735) | PIK3CD | 6.725873446 | 1.363193316 | 0.024370248 |
| [ENSCAFG00000012619](http://www.ensembl.org/id/ENSCAFG00000012619) | MGST1 | 6.71601302 | 4.451535928 | 8.66135E-15 |
| [ENSCAFG00000002021](http://www.ensembl.org/id/ENSCAFG00000002021) | ENPP5 | 6.707682654 | 2.405044524 | 5.75555E-05 |
| [ENSCAFG00000009934](http://www.ensembl.org/id/ENSCAFG00000009934) | ATXN1 | 6.686523208 | 1.502122447 | 0.001769634 |
| [ENSCAFG00000005728](http://www.ensembl.org/id/ENSCAFG00000005728) | GINS4 | 6.686041331 | 1.420487636 | 0.021754177 |
| [ENSCAFG00000004161](http://www.ensembl.org/id/ENSCAFG00000004161) | MEIS3 | 6.678471531 | 2.283612994 | 0.000281608 |
| [ENSCAFG00000013759](http://www.ensembl.org/id/ENSCAFG00000013759) | MEX3B | 6.678224781 | 3.112642009 | 5.84481E-10 |
| [ENSCAFG00000017135](http://www.ensembl.org/id/ENSCAFG00000017135) | APOBR | 6.677262146 | 2.024071553 | 0.000521687 |
| [ENSCAFG00000011945](http://www.ensembl.org/id/ENSCAFG00000011945) | VEGFD | 6.673157675 | 5.478891403 | 2.03379E-08 |
| [ENSCAFG00000025436](http://www.ensembl.org/id/ENSCAFG00000025436) | C3AR1 | 6.664437494 | 2.039504745 | 0.008176498 |
| [ENSCAFG00000011041](http://www.ensembl.org/id/ENSCAFG00000011041) | CSF2RA | 6.649685418 | 4.76038619 | 2.02461E-11 |
| [ENSCAFG00000005619](http://www.ensembl.org/id/ENSCAFG00000005619) | ARHGEF17 | 6.648113964 | 1.367386262 | 0.004251246 |
| [ENSCAFG00000005760](http://www.ensembl.org/id/ENSCAFG00000005760) | PLCB4 | 6.647341359 | 1.285999408 | 0.017380495 |
| [ENSCAFG00000013940](http://www.ensembl.org/id/ENSCAFG00000013940) | CLEC4E | 6.611826679 | 3.835109835 | 9.58115E-06 |
| [ENSCAFG00000030397](http://www.ensembl.org/id/ENSCAFG00000030397) | NACC2 | 6.608776028 | 1.592298589 | 0.000715487 |
| [ENSCAFG00000013049](http://www.ensembl.org/id/ENSCAFG00000013049) | EGR2 | 6.600528162 | 3.653847365 | 2.92115E-08 |
| [ENSCAFG00000014175](http://www.ensembl.org/id/ENSCAFG00000014175) | ITGA4 | 6.588534381 | 2.340236794 | 1.53146E-05 |
| [ENSCAFG00000015455](http://www.ensembl.org/id/ENSCAFG00000015455) | ECT2 | 6.586225193 | 1.193800901 | 0.017217386 |
| [ENSCAFG00000016992](http://www.ensembl.org/id/ENSCAFG00000016992) | SPDL1 | 6.585373632 | 1.195475977 | 0.039821012 |
| [ENSCAFG00000007122](http://www.ensembl.org/id/ENSCAFG00000007122) | HCK | 6.575744695 | 4.471370016 | 0 |
| [ENSCAFG00000005144](http://www.ensembl.org/id/ENSCAFG00000005144) | FNDC4 | 6.573080164 | 3.860091868 | 4.41417E-07 |
| [ENSCAFG00000032611](http://www.ensembl.org/id/ENSCAFG00000032611) | C4orf48 | 6.570912785 | 3.176195588 | 5.51906E-08 |
| [ENSCAFG00000019227](http://www.ensembl.org/id/ENSCAFG00000019227) | GLIS2 | 6.490729415 | 1.366644005 | 0.022590528 |
| [ENSCAFG00000001506](http://www.ensembl.org/id/ENSCAFG00000001506) | CYTH4 | 6.477844022 | 2.132608872 | 2.09882E-05 |
| [ENSCAFG00000017525](http://www.ensembl.org/id/ENSCAFG00000017525) | TTC7B | 6.476293879 | 1.10924476 | 0.039307937 |
| [ENSCAFG00000032227](http://www.ensembl.org/id/ENSCAFG00000032227) | OLFM1 | 6.471642996 | 3.093114576 | 0.000382212 |
| [ENSCAFG00000030815](http://www.ensembl.org/id/ENSCAFG00000030815) | PCDHB15 | 6.462092997 | 3.541407742 | 8.04826E-10 |
| [ENSCAFG00000013838](http://www.ensembl.org/id/ENSCAFG00000013838) | MASP1 | 6.443346366 | 4.510600593 | 0.00211033 |
| [ENSCAFG00000015868](http://www.ensembl.org/id/ENSCAFG00000015868) | ASRGL1 | 6.422042146 | 1.046059995 | 0.043856875 |
| [ENSCAFG00000006804](http://www.ensembl.org/id/ENSCAFG00000006804) | PRICKLE2 | 6.418259299 | 1.7234201 | 0.003563036 |
| [ENSCAFG00000006840](http://www.ensembl.org/id/ENSCAFG00000006840) | LDLRAD3 | 6.397364724 | 1.518894898 | 0.002178075 |
| [ENSCAFG00000004243](http://www.ensembl.org/id/ENSCAFG00000004243) | SLC36A4 | 6.366733024 | 1.206138317 | 0.023216514 |
| [ENSCAFG00000003327](http://www.ensembl.org/id/ENSCAFG00000003327) | COL27A1 | 6.362300534 | 1.886383991 | 2.21408E-05 |
| [ENSCAFG00000032127](http://www.ensembl.org/id/ENSCAFG00000032127) | CHST11 | 6.335583887 | 2.761676469 | 2.16536E-10 |
| [ENSCAFG00000000239](http://www.ensembl.org/id/ENSCAFG00000000239) | PDE7B | 6.322739916 | 2.919032754 | 6.11751E-05 |
| [ENSCAFG00000018019](http://www.ensembl.org/id/ENSCAFG00000018019) | CENPV | 6.314480796 | 2.847283041 | 7.60461E-06 |
| [ENSCAFG00000000790](http://www.ensembl.org/id/ENSCAFG00000000790) | GPSM3 | 6.306636517 | 2.106090211 | 0.000374892 |
| [ENSCAFG00000005500](http://www.ensembl.org/id/ENSCAFG00000005500) | UGGT2 | 6.286501861 | 2.471714285 | 3.11829E-07 |
| [ENSCAFG00000028686](http://www.ensembl.org/id/ENSCAFG00000028686) | PLEKHA3 | 6.255015145 | 1.123123528 | 0.021196441 |
| [ENSCAFG00000007778](http://www.ensembl.org/id/ENSCAFG00000007778) | BIN2 | 6.250774582 | 2.301571242 | 6.32908E-05 |
| [ENSCAFG00000004492](http://www.ensembl.org/id/ENSCAFG00000004492) | GRIP2 | 6.233134895 | 3.274934151 | 0.000135218 |
| [ENSCAFG00000009608](http://www.ensembl.org/id/ENSCAFG00000009608) | CEP97 | 6.232561414 | 1.568105052 | 0.00639449 |
| [ENSCAFG00000010253](http://www.ensembl.org/id/ENSCAFG00000010253) | CIP2A | 6.223171217 | 1.547572243 | 0.002848334 |
| [ENSCAFG00000004596](http://www.ensembl.org/id/ENSCAFG00000004596) | TMCC1 | 6.210513424 | 1.057587065 | 0.045932596 |
| [ENSCAFG00000009793](http://www.ensembl.org/id/ENSCAFG00000009793) | CBLB | 6.201843652 | 1.786105058 | 0.002320117 |
| [ENSCAFG00000002595](http://www.ensembl.org/id/ENSCAFG00000002595) | TMEM150B | 6.18983981 | 2.469633002 | 0.003388864 |
| [ENSCAFG00000013925](http://www.ensembl.org/id/ENSCAFG00000013925) | SEMA6D | 6.184747906 | 2.015924851 | 0.002621367 |
| [ENSCAFG00000009245](http://www.ensembl.org/id/ENSCAFG00000009245) | RHOBTB2 | 6.175005222 | 2.312544145 | 3.96601E-05 |
| [ENSCAFG00000014777](http://www.ensembl.org/id/ENSCAFG00000014777) | RCOR2 | 6.161962833 | 3.470786464 | 3.61112E-11 |
| [ENSCAFG00000013801](http://www.ensembl.org/id/ENSCAFG00000013801) | OSBPL6 | 6.160821608 | 1.712915701 | 0.00023864 |
| [ENSCAFG00000002900](http://www.ensembl.org/id/ENSCAFG00000002900) | KLK6 | 6.157657036 | 7.112246969 | 0.000514508 |
| [ENSCAFG00000017123](http://www.ensembl.org/id/ENSCAFG00000017123) | RASL12 | 6.153976276 | 2.825705842 | 0.000929332 |
| [ENSCAFG00000018012](http://www.ensembl.org/id/ENSCAFG00000018012) | TRPV2 | 6.153015363 | 1.596088104 | 0.007036987 |
| [ENSCAFG00000004973](http://www.ensembl.org/id/ENSCAFG00000004973) | CELF2 | 6.114436298 | 1.567304232 | 0.009735539 |
| [ENSCAFG00000010640](http://www.ensembl.org/id/ENSCAFG00000010640) | SLC2A10 | 6.098089019 | 1.993699513 | 0.000822915 |
| [ENSCAFG00000019244](http://www.ensembl.org/id/ENSCAFG00000019244) | SMYD4 | 6.092209669 | 1.265653746 | 0.019216093 |
| [ENSCAFG00000006051](http://www.ensembl.org/id/ENSCAFG00000006051) | EIF2AK2 | 6.089923728 | 1.698992644 | 0.003326695 |
| [ENSCAFG00000017790](http://www.ensembl.org/id/ENSCAFG00000017790) | PDE4A | 6.069973825 | 1.72876253 | 0.001768068 |
| [ENSCAFG00000011395](http://www.ensembl.org/id/ENSCAFG00000011395) | NCF1 | 6.069301799 | 3.874008305 | 1.12414E-08 |
| [ENSCAFG00000008416](http://www.ensembl.org/id/ENSCAFG00000008416) | ZBTB10 | 6.039456862 | 1.773621166 | 0.000980008 |
| [ENSCAFG00000018395](http://www.ensembl.org/id/ENSCAFG00000018395) | NDC80 | 6.037863079 | 1.276136101 | 0.032853116 |
| [ENSCAFG00000011157](http://www.ensembl.org/id/ENSCAFG00000011157) | CASP7 | 6.037839596 | 1.223397026 | 0.049302544 |
| [ENSCAFG00000009994](http://www.ensembl.org/id/ENSCAFG00000009994) | CD40 | 6.034142587 | 2.722930177 | 0.000119794 |
| [ENSCAFG00000000577](http://www.ensembl.org/id/ENSCAFG00000000577) | TIAM2 | 6.018662391 | 2.743375161 | 1.98604E-07 |
| [ENSCAFG00000015408](http://www.ensembl.org/id/ENSCAFG00000015408) | TECPR1 | 6.010202703 | 1.550410179 | 0.000247396 |
| [ENSCAFG00000016861](http://www.ensembl.org/id/ENSCAFG00000016861) | PNMA1 | 5.992273249 | 1.674999914 | 0.044390058 |
| [ENSCAFG00000024440](http://www.ensembl.org/id/ENSCAFG00000024440) | MEX3A | 5.978978963 | 4.76158634 | 3.71993E-09 |
| [ENSCAFG00000004136](http://www.ensembl.org/id/ENSCAFG00000004136) | EFR3B | 5.962088475 | 3.258869957 | 3.84448E-08 |
| [ENSCAFG00000003483](http://www.ensembl.org/id/ENSCAFG00000003483) | KCNF1 | 5.94576961 | 5.380484476 | 3.50019E-08 |
| [ENSCAFG00000002234](http://www.ensembl.org/id/ENSCAFG00000002234) | BARX1 | 5.902617226 | 3.416494279 | 0.000138803 |
| [ENSCAFG00000019730](http://www.ensembl.org/id/ENSCAFG00000019730) | SLC25A33 | 5.901299518 | 1.843470068 | 0.00112188 |
| [ENSCAFG00000018571](http://www.ensembl.org/id/ENSCAFG00000018571) | ADGRE1 | 5.89952385 | 6.303668571 | 0 |
| [ENSCAFG00000004828](http://www.ensembl.org/id/ENSCAFG00000004828) | SLC30A3 | 5.892661671 | 4.998355218 | 2.03837E-09 |
| [ENSCAFG00000014571](http://www.ensembl.org/id/ENSCAFG00000014571) | CDC45 | 5.870007099 | 1.715082772 | 0.004684136 |
| [ENSCAFG00000029836](http://www.ensembl.org/id/ENSCAFG00000029836) | CENPW | 5.852652533 | 1.793121088 | 0.005859598 |
| [ENSCAFG00000008997](http://www.ensembl.org/id/ENSCAFG00000008997) | FAM105A | 5.838592655 | 2.146267923 | 0.002476334 |
| [ENSCAFG00000011571](http://www.ensembl.org/id/ENSCAFG00000011571) | SOX5 | 5.827628622 | 3.954834107 | 1.44203E-11 |
| [ENSCAFG00000000820](http://www.ensembl.org/id/ENSCAFG00000000820) | CSF2 | 5.801147255 | 7.254254665 | 3.60547E-06 |
| [ENSCAFG00000011588](http://www.ensembl.org/id/ENSCAFG00000011588) | SV2A | 5.799946532 | 1.971035318 | 0.003708914 |
| [ENSCAFG00000005165](http://www.ensembl.org/id/ENSCAFG00000005165) | MGAT5B | 5.798926527 | 3.947401984 | 2.46206E-08 |
| [ENSCAFG00000011727](http://www.ensembl.org/id/ENSCAFG00000011727) | MILR1 | 5.797836427 | 2.73183491 | 4.61846E-06 |
| [ENSCAFG00000016883](http://www.ensembl.org/id/ENSCAFG00000016883) | ITGAX | 5.763524995 | 2.419606151 | 8.81354E-05 |
| [ENSCAFG00000003542](http://www.ensembl.org/id/ENSCAFG00000003542) | C1orf216 | 5.761709421 | 2.046347325 | 0.045477131 |
| [ENSCAFG00000012764](http://www.ensembl.org/id/ENSCAFG00000012764) | CLCN2 | 5.75897435 | 1.253421882 | 0.029326239 |
| [ENSCAFG00000005732](http://www.ensembl.org/id/ENSCAFG00000005732) | BAHCC1 | 5.749178384 | 1.38212339 | 0.004924608 |
| [ENSCAFG00000017877](http://www.ensembl.org/id/ENSCAFG00000017877) | STRA6 | 5.746161353 | 4.025105147 | 8.04115E-06 |
| [ENSCAFG00000030112](http://www.ensembl.org/id/ENSCAFG00000030112) | DDIT3 | 5.738083808 | 2.146373568 | 2.10621E-05 |
| [ENSCAFG00000008623](http://www.ensembl.org/id/ENSCAFG00000008623) | PRPH | 5.726630835 | 5.639993652 | 2.22486E-10 |
| [ENSCAFG00000003996](http://www.ensembl.org/id/ENSCAFG00000003996) | FGF2 | 5.726070216 | 2.907964818 | 0.000808043 |
| [ENSCAFG00000017349](http://www.ensembl.org/id/ENSCAFG00000017349) | STXBP4 | 5.723987721 | 2.30247523 | 3.54212E-05 |
| [ENSCAFG00000014940](http://www.ensembl.org/id/ENSCAFG00000014940) | SAMD4A | 5.71948293 | 1.79126735 | 0.001592984 |
| [ENSCAFG00000005675](http://www.ensembl.org/id/ENSCAFG00000005675) | RNF213 | 5.710158984 | 1.295756515 | 0.033885661 |
| [ENSCAFG00000013254](http://www.ensembl.org/id/ENSCAFG00000013254) | GPR155 | 5.709498683 | 1.392321353 | 0.018480532 |
| [ENSCAFG00000008752](http://www.ensembl.org/id/ENSCAFG00000008752) | FRAS1 | 5.708181824 | 2.100793046 | 0.000107621 |
| [ENSCAFG00000008902](http://www.ensembl.org/id/ENSCAFG00000008902) | PTX3 | 5.704115239 | 3.375293159 | 1.56154E-06 |
| [ENSCAFG00000010391](http://www.ensembl.org/id/ENSCAFG00000010391) | FAM189A1 | 5.683133959 | 4.567522165 | 1.0357E-09 |
| [ENSCAFG00000012073](http://www.ensembl.org/id/ENSCAFG00000012073) | LIMK1 | 5.658729276 | 3.336247614 | 3.54802E-09 |
| [ENSCAFG00000007247](http://www.ensembl.org/id/ENSCAFG00000007247) | ANKRD1 | 5.657784692 | 5.218707551 | 0.00169644 |
| [ENSCAFG00000009024](http://www.ensembl.org/id/ENSCAFG00000009024) | CCDC184 | 5.651704507 | 3.043812208 | 0.00013924 |
| [ENSCAFG00000011716](http://www.ensembl.org/id/ENSCAFG00000011716) | UBASH3B | 5.638430819 | 1.741565536 | 0.007048673 |
| [ENSCAFG00000014965](http://www.ensembl.org/id/ENSCAFG00000014965) | GCH1 | 5.603977451 | 2.551424944 | 0.001551903 |
| [ENSCAFG00000020316](http://www.ensembl.org/id/ENSCAFG00000020316) | SLC7A6 | 5.593578125 | 2.528109724 | 3.313E-05 |
| [ENSCAFG00000008325](http://www.ensembl.org/id/ENSCAFG00000008325) | TM4SF18 | 5.552055297 | 1.879385582 | 0.000942371 |
| [ENSCAFG00000007266](http://www.ensembl.org/id/ENSCAFG00000007266) | HECTD2 | 5.523951438 | 1.544111778 | 0.00175724 |
| [ENSCAFG00000004390](http://www.ensembl.org/id/ENSCAFG00000004390) | MAST2 | 5.523391165 | 1.380370917 | 0.000969748 |
| [ENSCAFG00000008034](http://www.ensembl.org/id/ENSCAFG00000008034) | SLF1 | 5.514520755 | 1.893198485 | 0.000160374 |
| [ENSCAFG00000010955](http://www.ensembl.org/id/ENSCAFG00000010955) | PTHLH | 5.495469435 | 3.565786656 | 1.11017E-06 |
| [ENSCAFG00000019919](http://www.ensembl.org/id/ENSCAFG00000019919) | IRF8 | 5.480383823 | 1.585505375 | 0.041856318 |
| [ENSCAFG00000020243](http://www.ensembl.org/id/ENSCAFG00000020243) | ZFHX3 | 5.464840849 | 1.251030982 | 0.011041698 |
| [ENSCAFG00000000547](http://www.ensembl.org/id/ENSCAFG00000000547) | FBXO5 | 5.460812164 | 1.566691604 | 0.003977984 |
| [ENSCAFG00000007914](http://www.ensembl.org/id/ENSCAFG00000007914) | ARSK | 5.46036249 | 1.525882924 | 0.034001766 |
| [ENSCAFG00000005433](http://www.ensembl.org/id/ENSCAFG00000005433) | ABCC4 | 5.458942776 | 1.371603448 | 0.030858074 |
| [ENSCAFG00000009216](http://www.ensembl.org/id/ENSCAFG00000009216) | TBX3 | 5.440862077 | 2.179407587 | 0.016399999 |
| [ENSCAFG00000018081](http://www.ensembl.org/id/ENSCAFG00000018081) | SPECC1 | 5.438854476 | 1.214548744 | 0.015078417 |
| [ENSCAFG00000032191](http://www.ensembl.org/id/ENSCAFG00000032191) | MAP1A | 5.437511543 | 2.030725446 | 4.13414E-05 |
| [ENSCAFG00000013156](http://www.ensembl.org/id/ENSCAFG00000013156) | CSPG5 | 5.432803853 | 4.38570382 | 4.16967E-13 |
| [ENSCAFG00000019379](http://www.ensembl.org/id/ENSCAFG00000019379) | ABCA3 | 5.428831519 | 2.981875423 | 1.47387E-08 |
| [ENSCAFG00000011383](http://www.ensembl.org/id/ENSCAFG00000011383) | CMKLR1 | 5.415268155 | 2.987798018 | 7.7082E-05 |
| [ENSCAFG00000018673](http://www.ensembl.org/id/ENSCAFG00000018673) | SMARCA1 | 5.414167432 | 1.795486718 | 0.000499605 |
| [ENSCAFG00000015177](http://www.ensembl.org/id/ENSCAFG00000015177) | SELL | 5.408156877 | 4.629959577 | 4.76952E-14 |
| [ENSCAFG00000003103](http://www.ensembl.org/id/ENSCAFG00000003103) | RRAGD | 5.401637216 | 1.485371283 | 0.006623364 |
| [ENSCAFG00000009272](http://www.ensembl.org/id/ENSCAFG00000009272) | EGR3 | 5.39435747 | 4.235130775 | 1.8819E-07 |
| [ENSCAFG00000003044](http://www.ensembl.org/id/ENSCAFG00000003044) | SCRN1 | 5.38961204 | 2.585327812 | 1.90771E-05 |
| [ENSCAFG00000002026](http://www.ensembl.org/id/ENSCAFG00000002026) | CYP39A1 | 5.38290917 | 1.559392923 | 0.008668699 |
| [ENSCAFG00000006611](http://www.ensembl.org/id/ENSCAFG00000006611) | HOXC4 | 5.381520406 | 6.358029543 | 2.72836E-07 |
| [ENSCAFG00000008378](http://www.ensembl.org/id/ENSCAFG00000008378) | ESCO2 | 5.378738791 | 1.233990956 | 0.031467881 |
| [ENSCAFG00000028762](http://www.ensembl.org/id/ENSCAFG00000028762) | KLRG1 | 5.377740206 | 3.623568138 | 5.23373E-07 |
| [ENSCAFG00000031558](http://www.ensembl.org/id/ENSCAFG00000031558) | ZNF853 | 5.376686938 | 1.116351718 | 0.041398866 |
| [ENSCAFG00000003801](http://www.ensembl.org/id/ENSCAFG00000003801) | SCLT1 | 5.373485587 | 1.171073824 | 0.043129049 |
| [ENSCAFG00000011857](http://www.ensembl.org/id/ENSCAFG00000011857) | SLAMF9 | 5.371360772 | 1.9784414 | 0.046059037 |
| [ENSCAFG00000007131](http://www.ensembl.org/id/ENSCAFG00000007131) | MERTK | 5.353921844 | 1.789936904 | 0.013326227 |
| [ENSCAFG00000007693](http://www.ensembl.org/id/ENSCAFG00000007693) | LPXN | 5.346631751 | 1.706260356 | 0.009267568 |
| [ENSCAFG00000016447](http://www.ensembl.org/id/ENSCAFG00000016447) | CD5L | 5.321676449 | 6.185791191 | 1.04014E-05 |
| [ENSCAFG00000010924](http://www.ensembl.org/id/ENSCAFG00000010924) | PKNOX2 | 5.32069987 | 1.699254008 | 0.021386901 |
| [ENSCAFG00000018466](http://www.ensembl.org/id/ENSCAFG00000018466) | ADAP2 | 5.316893444 | 2.537305977 | 3.21074E-06 |
| [ENSCAFG00000010511](http://www.ensembl.org/id/ENSCAFG00000010511) | OASL | 5.309159271 | 2.681747306 | 0.000688427 |
| [ENSCAFG00000015233](http://www.ensembl.org/id/ENSCAFG00000015233) | PROM1 | 5.302366914 | 3.126688673 | 1.35209E-06 |
| [ENSCAFG00000018793](http://www.ensembl.org/id/ENSCAFG00000018793) | HSD11B1L | 5.289587474 | 2.002422324 | 0.005073002 |
| [ENSCAFG00000032377](http://www.ensembl.org/id/ENSCAFG00000032377) | EVA1A | 5.268117841 | 3.451802481 | 2.28867E-08 |
| [ENSCAFG00000007651](http://www.ensembl.org/id/ENSCAFG00000007651) | DTX4 | 5.253364929 | 2.65479281 | 0.00010716 |
| [ENSCAFG00000012391](http://www.ensembl.org/id/ENSCAFG00000012391) | PDE3A | 5.235339471 | 2.313836737 | 9.29942E-06 |
| [ENSCAFG00000013783](http://www.ensembl.org/id/ENSCAFG00000013783) | CCR5 | 5.229241766 | 2.900736369 | 0.00018057 |
| [ENSCAFG00000000969](http://www.ensembl.org/id/ENSCAFG00000000969) | HSF2 | 5.221849948 | 1.421716493 | 0.039631411 |
| [ENSCAFG00000017709](http://www.ensembl.org/id/ENSCAFG00000017709) | CLMN | 5.221390799 | 3.546040834 | 1.26111E-08 |
| [ENSCAFG00000017010](http://www.ensembl.org/id/ENSCAFG00000017010) | NLGN3 | 5.197483197 | 3.147674988 | 2.1579E-06 |
| [ENSCAFG00000004754](http://www.ensembl.org/id/ENSCAFG00000004754) | MCM10 | 5.191738823 | 1.684123088 | 0.002108703 |
| [ENSCAFG00000007133](http://www.ensembl.org/id/ENSCAFG00000007133) | DEPDC1B | 5.189331165 | 1.855927606 | 0.001074008 |
| [ENSCAFG00000030102](http://www.ensembl.org/id/ENSCAFG00000030102) | TPC3 | 5.185472432 | 1.477219491 | 0.012579066 |
| [ENSCAFG00000007392](http://www.ensembl.org/id/ENSCAFG00000007392) | CENPK | 5.181394522 | 1.798750214 | 0.031223123 |
| [ENSCAFG00000011346](http://www.ensembl.org/id/ENSCAFG00000011346) | ITGA10 | 5.158599656 | 3.696716774 | 2.01685E-07 |
| [ENSCAFG00000016952](http://www.ensembl.org/id/ENSCAFG00000016952) | C16orf54 | 5.147884755 | 2.399589284 | 0.00870237 |
| [ENSCAFG00000020142](http://www.ensembl.org/id/ENSCAFG00000020142) | GARNL3 | 5.147452297 | 1.578226946 | 0.012093747 |
| [ENSCAFG00000006424](http://www.ensembl.org/id/ENSCAFG00000006424) | GXYLT2 | 5.14557374 | 2.444337168 | 1.2259E-05 |
| [ENSCAFG00000008561](http://www.ensembl.org/id/ENSCAFG00000008561) | WDR54 | 5.133595135 | 2.40438566 | 6.34389E-05 |
| [ENSCAFG00000010891](http://www.ensembl.org/id/ENSCAFG00000010891) | PGPEP1L | 5.128098655 | 6.682082445 | 6.93102E-07 |
| [ENSCAFG00000013196](http://www.ensembl.org/id/ENSCAFG00000013196) | TM6SF1 | 5.107588889 | 2.06548644 | 0.001569581 |
| [ENSCAFG00000014584](http://www.ensembl.org/id/ENSCAFG00000014584) | TMEM106A | 5.085279305 | 1.67797101 | 0.039308011 |
| [ENSCAFG00000011625](http://www.ensembl.org/id/ENSCAFG00000011625) | NFATC2 | 5.081714106 | 1.547463064 | 0.041398866 |
| [ENSCAFG00000030320](http://www.ensembl.org/id/ENSCAFG00000030320) | SHISA2 | 5.073389833 | 3.096110652 | 7.51303E-06 |
| [ENSCAFG00000002019](http://www.ensembl.org/id/ENSCAFG00000002019) | RASL11B | 5.071302476 | 2.206449547 | 0.001059961 |
| [ENSCAFG00000011317](http://www.ensembl.org/id/ENSCAFG00000011317) | SELPLG | 5.069583923 | 2.143141463 | 0.000371848 |
| [ENSCAFG00000011769](http://www.ensembl.org/id/ENSCAFG00000011769) | ANK2 | 5.062496993 | 1.641588296 | 0.002924544 |
| [ENSCAFG00000007100](http://www.ensembl.org/id/ENSCAFG00000007100) | PDE4D | 5.061053714 | 1.488995941 | 0.048632323 |
| [ENSCAFG00000011745](http://www.ensembl.org/id/ENSCAFG00000011745) | SORL1 | 5.056429713 | 3.412557652 | 1.46558E-10 |
| [ENSCAFG00000003340](http://www.ensembl.org/id/ENSCAFG00000003340) | AKNA | 5.047470424 | 1.461870935 | 0.006067821 |
| [ENSCAFG00000018950](http://www.ensembl.org/id/ENSCAFG00000018950) | ANKRD13B | 5.037364777 | 1.323120383 | 0.026971066 |
| [ENSCAFG00000006830](http://www.ensembl.org/id/ENSCAFG00000006830) | MSR1 | 5.03732682 | 3.762422322 | 2.05624E-09 |
| [ENSCAFG00000020350](http://www.ensembl.org/id/ENSCAFG00000020350) | ENKD1 | 5.018768501 | 1.602971221 | 0.020426519 |

FDR, false discovery rate.

| **Table SIV. Differentially expressed genes downregulated in canine oral melanoma samples.** | | | | |
| --- | --- | --- | --- | --- |
| Ensembl ID | Name | Max group mean | Log₂ fold change | FDR P-value |
| [ENSCAFG00000023449](http://www.ensembl.org/id/ENSCAFG00000023449) | KRT13 | 19890.23609 | -11.27810332 | 0 |
| [ENSCAFG00000007233](http://www.ensembl.org/id/ENSCAFG00000007233) | KRT71 | 7541.688327 | -15.13319019 | 0 |
| [ENSCAFG00000017557](http://www.ensembl.org/id/ENSCAFG00000017557) | S100A8 | 5616.157022 | -6.39785469 | 0 |
| [ENSCAFG00000029892](http://www.ensembl.org/id/ENSCAFG00000029892) | RPL13A | 2271.343868 | -1.513459879 | 0.027469608 |
| [ENSCAFG00000023529](http://www.ensembl.org/id/ENSCAFG00000023529) | KRT15 | 1949.261125 | -8.975973373 | 8.66135E-15 |
| [ENSCAFG00000017553](http://www.ensembl.org/id/ENSCAFG00000017553) | S100A6 | 1728.782169 | -1.56322477 | 0.021866762 |
| [ENSCAFG00000000190](http://www.ensembl.org/id/ENSCAFG00000000190) | RPS12 | 1553.188039 | -1.638746237 | 0.012740604 |
| [ENSCAFG00000007990](http://www.ensembl.org/id/ENSCAFG00000007990) | RPS3A | 1478.745658 | -1.581281628 | 0.019532288 |
| [ENSCAFG00000011163](http://www.ensembl.org/id/ENSCAFG00000011163) | ARSF | 1426.603766 | -12.19831506 | 0 |
| [ENSCAFG00000023828](http://www.ensembl.org/id/ENSCAFG00000023828) | TGM3 | 1376.03872 | -15.43829609 | 0 |
| [ENSCAFG00000020252](http://www.ensembl.org/id/ENSCAFG00000020252) | NQO1 | 1365.958263 | -4.763614476 | 9.87616E-11 |
| [ENSCAFG00000023922](http://www.ensembl.org/id/ENSCAFG00000023922) | AQP3 | 1324.472821 | -11.7832697 | 0 |
| [ENSCAFG00000001318](http://www.ensembl.org/id/ENSCAFG00000001318) | RPL10A | 1195.071618 | -1.51231646 | 0.025274522 |
| [ENSCAFG00000017544](http://www.ensembl.org/id/ENSCAFG00000017544) | S100A14 | 1165.913739 | -9.555767692 | 0 |
| [ENSCAFG00000003967](http://www.ensembl.org/id/ENSCAFG00000003967) | RPL18 | 1154.921301 | -1.488813241 | 0.023355604 |
| [ENSCAFG00000023324](http://www.ensembl.org/id/ENSCAFG00000023324) | S100A12 | 1116.367622 | -3.631422635 | 2.86669E-05 |
| [ENSCAFG00000007251](http://www.ensembl.org/id/ENSCAFG00000007251) | KRT5 | 1102.311733 | -7.575581138 | 4.74327E-10 |
| [ENSCAFG00000013016](http://www.ensembl.org/id/ENSCAFG00000013016) | SPRR3 | 1090.426813 | -13.23899417 | 0 |
| [ENSCAFG00000032326](http://www.ensembl.org/id/ENSCAFG00000032326) | S100A2 | 1023.838115 | -8.469980831 | 0 |
| [ENSCAFG00000031033](http://www.ensembl.org/id/ENSCAFG00000031033) | EMP1 | 1014.185015 | -2.701792793 | 5.16681E-05 |
| [ENSCAFG00000010987](http://www.ensembl.org/id/ENSCAFG00000010987) | SLC25A6 | 907.9836582 | -1.443995326 | 0.043495638 |
| [ENSCAFG00000002366](http://www.ensembl.org/id/ENSCAFG00000002366) | RPS5 | 898.1261891 | -1.506353579 | 0.022987287 |
| [ENSCAFG00000001778](http://www.ensembl.org/id/ENSCAFG00000001778) | ANXA1 | 821.7695449 | -3.141817332 | 4.53112E-06 |
| [ENSCAFG00000017386](http://www.ensembl.org/id/ENSCAFG00000017386) | RPS27 | 813.9486905 | -1.305782822 | 0.030060936 |
| [ENSCAFG00000012290](http://www.ensembl.org/id/ENSCAFG00000012290) | SFN | 769.2134926 | -8.549424168 | 0 |
| [ENSCAFG00000011927](http://www.ensembl.org/id/ENSCAFG00000011927) | RHCG | 723.8378326 | -12.84073049 | 0 |
| [ENSCAFG00000009276](http://www.ensembl.org/id/ENSCAFG00000009276) | SERPINB1 | 680.161579 | -4.284801333 | 6.24922E-13 |
| [ENSCAFG00000006674](http://www.ensembl.org/id/ENSCAFG00000006674) | SPINK5 | 646.388121 | -11.37480897 | 0 |
| [ENSCAFG00000013934](http://www.ensembl.org/id/ENSCAFG00000013934) | FAU | 631.5128438 | -1.303824668 | 0.024227395 |
| [ENSCAFG00000020110](http://www.ensembl.org/id/ENSCAFG00000020110) | TF | 598.2238182 | -4.491771069 | 1.54022E-07 |
| [ENSCAFG00000017545](http://www.ensembl.org/id/ENSCAFG00000017545) | S100A16 | 549.0286762 | -6.490015324 | 0 |
| [ENSCAFG00000025402](http://www.ensembl.org/id/ENSCAFG00000025402) | KRT78 | 508.5240706 | -11.77812871 | 0 |
| [ENSCAFG00000008647](http://www.ensembl.org/id/ENSCAFG00000008647) | TKT | 466.170896 | -1.66845845 | 0.01193048 |
| [ENSCAFG00000030892](http://www.ensembl.org/id/ENSCAFG00000030892) | PERP | 425.0318481 | -8.339934272 | 0 |
| [ENSCAFG00000016165](http://www.ensembl.org/id/ENSCAFG00000016165) | GPX2 | 421.0816574 | -8.94888878 | 0 |
| [ENSCAFG00000007303](http://www.ensembl.org/id/ENSCAFG00000007303) | GPI | 420.5190494 | -1.6029148 | 0.013134414 |
| [ENSCAFG00000029537](http://www.ensembl.org/id/ENSCAFG00000029537) | GJB2 | 409.2604038 | -5.377531884 | 1.11372E-08 |
| [ENSCAFG00000012000](http://www.ensembl.org/id/ENSCAFG00000012000) | TRIM29 | 399.6917575 | -9.963230323 | 0 |
| [ENSCAFG00000002585](http://www.ensembl.org/id/ENSCAFG00000002585) | RPL28 | 396.0176481 | -1.82175085 | 0.003143002 |
| [ENSCAFG00000015912](http://www.ensembl.org/id/ENSCAFG00000015912) | JUP | 392.6518664 | -4.917058359 | 0 |
| [ENSCAFG00000007052](http://www.ensembl.org/id/ENSCAFG00000007052) | MALL | 368.7054814 | -6.942210838 | 0 |
| [ENSCAFG00000016031](http://www.ensembl.org/id/ENSCAFG00000016031) | HSPA2 | 359.5941666 | -5.719842035 | 0 |
| [ENSCAFG00000031330](http://www.ensembl.org/id/ENSCAFG00000031330) | HOPX | 348.4567723 | -8.446232254 | 0 |
| [ENSCAFG00000009570](http://www.ensembl.org/id/ENSCAFG00000009570) | DSP | 342.8433446 | -6.34204276 | 3.5918E-13 |
| [ENSCAFG00000013000](http://www.ensembl.org/id/ENSCAFG00000013000) | CRNN | 329.4546465 | -13.23498636 | 0 |
| [ENSCAFG00000031250](http://www.ensembl.org/id/ENSCAFG00000031250) | KRT14 | 324.1503842 | -5.188014531 | 5.1995E-06 |
| [ENSCAFG00000019134](http://www.ensembl.org/id/ENSCAFG00000019134) | PPL | 316.8138888 | -5.925841609 | 0 |
| [ENSCAFG00000004074](http://www.ensembl.org/id/ENSCAFG00000004074) | SELENOW | 306.9757668 | -1.413566011 | 0.006060049 |
| [ENSCAFG00000013544](http://www.ensembl.org/id/ENSCAFG00000013544) | HSPB1 | 285.7330237 | -2.058061424 | 0.004747981 |
| [ENSCAFG00000007322](http://www.ensembl.org/id/ENSCAFG00000007322) | KRT3 | 284.9690046 | -11.5287632 | 0 |
| [ENSCAFG00000000661](http://www.ensembl.org/id/ENSCAFG00000000661) | EZR | 268.7860911 | -1.609405959 | 0.022335156 |
| [ENSCAFG00000007124](http://www.ensembl.org/id/ENSCAFG00000007124) | FXYD3 | 265.9212331 | -3.084014673 | 0.026052299 |
| [ENSCAFG00000029929](http://www.ensembl.org/id/ENSCAFG00000029929) | PKP1 | 264.2402015 | -9.97491112 | 0 |
| [ENSCAFG00000004761](http://www.ensembl.org/id/ENSCAFG00000004761) | LYPD3 | 253.4635322 | -11.98501 | 0 |
| [ENSCAFG00000009113](http://www.ensembl.org/id/ENSCAFG00000009113) | MT1 | 252.1798913 | -2.780450813 | 0.000585621 |
| [ENSCAFG00000007731](http://www.ensembl.org/id/ENSCAFG00000007731) | ATP1B3 | 248.3486843 | -2.70259761 | 1.48013E-08 |
| [ENSCAFG00000009333](http://www.ensembl.org/id/ENSCAFG00000009333) | CESdD1 | 242.3369351 | -9.074733907 | 0 |
| [ENSCAFG00000001065](http://www.ensembl.org/id/ENSCAFG00000001065) | PITX1 | 240.569686 | -4.957091365 | 5.6069E-11 |
| [ENSCAFG00000003000](http://www.ensembl.org/id/ENSCAFG00000003000) | PTGR1 | 233.4173412 | -2.959873242 | 1.92822E-07 |
| [ENSCAFG00000009441](http://www.ensembl.org/id/ENSCAFG00000009441) | CD82 | 232.7415724 | -2.342291304 | 0.000394556 |
| [ENSCAFG00000020131](http://www.ensembl.org/id/ENSCAFG00000020131) | FAM129B | 230.4534449 | -2.33513413 | 0.000117867 |
| [ENSCAFG00000003833](http://www.ensembl.org/id/ENSCAFG00000003833) | SDC1 | 221.5674511 | -3.51253397 | 2.24072E-08 |
| [ENSCAFG00000000141](http://www.ensembl.org/id/ENSCAFG00000000141) | NACA | 219.5129024 | -1.348473403 | 0.049334946 |
| [ENSCAFG00000032525](http://www.ensembl.org/id/ENSCAFG00000032525) | AHNAK | 214.6695338 | -2.821130992 | 6.69744E-05 |
| [ENSCAFG00000012182](http://www.ensembl.org/id/ENSCAFG00000012182) | TGM1 | 198.4040362 | -8.598541013 | 0 |
| [ENSCAFG00000031314](http://www.ensembl.org/id/ENSCAFG00000031314) | CAPNS1 | 192.5169135 | -2.305330673 | 4.28363E-05 |
| [ENSCAFG00000013853](http://www.ensembl.org/id/ENSCAFG00000013853) | A2ML1 | 192.0014741 | -11.68778195 | 0 |
| [ENSCAFG00000004033](http://www.ensembl.org/id/ENSCAFG00000004033) | PDZK1IP1 | 188.871261 | -8.449622852 | 0 |
| [ENSCAFG00000002628](http://www.ensembl.org/id/ENSCAFG00000002628) | EPS8L1 | 188.6684038 | -9.850882677 | 0 |
| [ENSCAFG00000018058](http://www.ensembl.org/id/ENSCAFG00000018058) | DSG3 | 181.8460663 | -9.188266586 | 0 |
| [ENSCAFG00000014636](http://www.ensembl.org/id/ENSCAFG00000014636) | TMBIM1 | 181.3054855 | -1.81569121 | 0.000426119 |
| [ENSCAFG00000014247](http://www.ensembl.org/id/ENSCAFG00000014247) | CEACAM1 | 175.1950229 | -5.598487054 | 0 |
| [ENSCAFG00000005021](http://www.ensembl.org/id/ENSCAFG00000005021) | EVPL | 174.4026625 | -7.83401447 | 0 |
| [ENSCAFG00000015209](http://www.ensembl.org/id/ENSCAFG00000015209) | TUBA4A | 173.6161404 | -3.660833864 | 0 |
| [ENSCAFG00000003102](http://www.ensembl.org/id/ENSCAFG00000003102) | AQP1 | 172.982636 | -2.010521231 | 0.035429346 |
| [ENSCAFG00000000839](http://www.ensembl.org/id/ENSCAFG00000000839) | MAL2 | 171.869597 | -8.425049634 | 0 |
| [ENSCAFG00000018250](http://www.ensembl.org/id/ENSCAFG00000018250) | PLS3 | 168.5913971 | -1.91666597 | 0.001644063 |
| [ENSCAFG00000013102](http://www.ensembl.org/id/ENSCAFG00000013102) | GLUL | 167.2858113 | -1.371179675 | 0.029438842 |
| [ENSCAFG00000018085](http://www.ensembl.org/id/ENSCAFG00000018085) | DSC2 | 167.1611035 | -9.046837738 | 0 |
| [ENSCAFG00000015272](http://www.ensembl.org/id/ENSCAFG00000015272) | FGFBP1 | 166.1598352 | -8.211339441 | 2.39142E-12 |
| [ENSCAFG00000009329](http://www.ensembl.org/id/ENSCAFG00000009329) | PDLIM2 | 163.3938192 | -4.086152736 | 0 |
| [ENSCAFG00000018064](http://www.ensembl.org/id/ENSCAFG00000018064) | DSG1 | 157.6500116 | -11.14337884 | 0 |
| [ENSCAFG00000004599](http://www.ensembl.org/id/ENSCAFG00000004599) | SLC9A3R1 | 154.686072 | -3.054450508 | 1.92462E-06 |
| [ENSCAFG00000010222](http://www.ensembl.org/id/ENSCAFG00000010222) | BARX2 | 153.2732291 | -8.928156407 | 0 |
| [ENSCAFG00000010132](http://www.ensembl.org/id/ENSCAFG00000010132) | APLP2 | 148.4124486 | -1.978022057 | 0.000433015 |
| [ENSCAFG00000009199](http://www.ensembl.org/id/ENSCAFG00000009199) | ENDOU | 146.5467812 | -10.28185326 | 0 |
| [ENSCAFG00000005037](http://www.ensembl.org/id/ENSCAFG00000005037) | KLF5 | 140.6824284 | -5.235251895 | 0 |
| [ENSCAFG00000001211](http://www.ensembl.org/id/ENSCAFG00000001211) | HMGA1 | 138.2578884 | -1.246946479 | 0.048750846 |
| [ENSCAFG00000016689](http://www.ensembl.org/id/ENSCAFG00000016689) | CLTB | 137.224337 | -2.20373797 | 1.28824E-06 |
| [ENSCAFG00000005609](http://www.ensembl.org/id/ENSCAFG00000005609) | XDH | 136.0175304 | -6.284603096 | 0 |
| [ENSCAFG00000013078](http://www.ensembl.org/id/ENSCAFG00000013078) | CST6 | 132.7387439 | -7.931622359 | 0 |
| [ENSCAFG00000009314](http://www.ensembl.org/id/ENSCAFG00000009314) | NQO2 | 132.3729592 | -4.249273859 | 0 |
| [ENSCAFG00000000913](http://www.ensembl.org/id/ENSCAFG00000000913) | TSPO | 132.3703202 | -1.967438783 | 0.000150382 |
| [ENSCAFG00000024647](http://www.ensembl.org/id/ENSCAFG00000024647) | SERPINB5 | 131.8707576 | -8.009000575 | 0 |
| [ENSCAFG00000024908](http://www.ensembl.org/id/ENSCAFG00000024908) | PLA2G4E | 131.7089616 | -11.56597866 | 0 |
| [ENSCAFG00000016797](http://www.ensembl.org/id/ENSCAFG00000016797) | PGD | 129.5428838 | -1.835220234 | 0.001921471 |
| [ENSCAFG00000024150](http://www.ensembl.org/id/ENSCAFG00000024150) | ARF6 | 127.8852179 | -1.623493247 | 0.000225444 |
| [ENSCAFG00000017255](http://www.ensembl.org/id/ENSCAFG00000017255) | RAB11A | 127.2520931 | -1.59600929 | 0.00465612 |
| [ENSCAFG00000018959](http://www.ensembl.org/id/ENSCAFG00000018959) | EMP2 | 123.5239322 | -3.666007031 | 1.7716E-12 |
| [ENSCAFG00000014049](http://www.ensembl.org/id/ENSCAFG00000014049) | CLEC3B | 119.894532 | -5.886196986 | 5.75999E-06 |
| [ENSCAFG00000016866](http://www.ensembl.org/id/ENSCAFG00000016866) | RAB25 | 119.8805087 | -8.850339947 | 0 |
| [ENSCAFG00000010068](http://www.ensembl.org/id/ENSCAFG00000010068) | TNNI2 | 119.6198374 | -3.925646356 | 0.000556888 |
| [ENSCAFG00000004929](http://www.ensembl.org/id/ENSCAFG00000004929) | TMEM40 | 119.1956888 | -6.613357439 | 0 |
| [ENSCAFG00000017772](http://www.ensembl.org/id/ENSCAFG00000017772) | C17orf64 | 118.7326899 | -4.643270197 | 0 |
| [ENSCAFG00000001281](http://www.ensembl.org/id/ENSCAFG00000001281) | LYPD2 | 117.9723538 | -11.90277481 | 0 |
| [ENSCAFG00000002808](http://www.ensembl.org/id/ENSCAFG00000002808) | TMPRSS11B | 116.7217861 | -10.92330889 | 0 |
| [ENSCAFG00000010901](http://www.ensembl.org/id/ENSCAFG00000010901) | FAR2 | 116.2202206 | -4.331541322 | 0 |
| [ENSCAFG00000007854](http://www.ensembl.org/id/ENSCAFG00000007854) | CAST | 115.2712057 | -2.564647921 | 5.51246E-08 |
| [ENSCAFG00000009212](http://www.ensembl.org/id/ENSCAFG00000009212) | GMDS | 114.0219233 | -3.408339763 | 0 |
| [ENSCAFG00000012806](http://www.ensembl.org/id/ENSCAFG00000012806) | MPZL2 | 112.2013084 | -7.85328996 | 0 |
| [ENSCAFG00000013830](http://www.ensembl.org/id/ENSCAFG00000013830) | CAPN1 | 111.3310682 | -2.073188749 | 2.38084E-05 |
| [ENSCAFG00000019176](http://www.ensembl.org/id/ENSCAFG00000019176) | ZNF185 | 111.3300308 | -8.382905376 | 0 |
| [ENSCAFG00000004814](http://www.ensembl.org/id/ENSCAFG00000004814) | CNFN | 110.6681351 | -11.95449818 | 0 |
| [ENSCAFG00000031501](http://www.ensembl.org/id/ENSCAFG00000031501) | C15orf48 | 110.1916217 | -3.78196163 | 4.02345E-07 |
| [ENSCAFG00000005948](http://www.ensembl.org/id/ENSCAFG00000005948) | SPINT2 | 108.9695695 | -4.002896704 | 0 |
| [ENSCAFG00000025183](http://www.ensembl.org/id/ENSCAFG00000025183) | EPS8L2 | 108.9080551 | -9.136373848 | 0 |
| [ENSCAFG00000012012](http://www.ensembl.org/id/ENSCAFG00000012012) | NECTIN1 | 108.7099368 | -3.726703537 | 1.60731E-10 |
| [ENSCAFG00000031768](http://www.ensembl.org/id/ENSCAFG00000031768) | C6orf132 | 108.4889688 | -9.944674018 | 0 |
| [ENSCAFG00000000115](http://www.ensembl.org/id/ENSCAFG00000000115) | CS | 108.3599855 | -1.249608015 | 0.017361008 |
| [ENSCAFG00000016589](http://www.ensembl.org/id/ENSCAFG00000016589) | SRSF5 | 107.6234552 | -1.69895294 | 0.000156354 |
| [ENSCAFG00000011405](http://www.ensembl.org/id/ENSCAFG00000011405) | TXNIP | 101.3786993 | -1.520229551 | 0.028347451 |
| [ENSCAFG00000008343](http://www.ensembl.org/id/ENSCAFG00000008343) | TM4SF1 | 101.2898031 | -3.258894798 | 4.34929E-06 |
| [ENSCAFG00000012984](http://www.ensembl.org/id/ENSCAFG00000012984) | H2AFJ | 101.2176357 | -2.789598965 | 2.5083E-07 |
| [ENSCAFG00000006959](http://www.ensembl.org/id/ENSCAFG00000006959) | PROM2 | 96.99216499 | -9.166619181 | 0 |
| [ENSCAFG00000005700](http://www.ensembl.org/id/ENSCAFG00000005700) | BAIAP2 | 95.85559078 | -2.815329123 | 5.56444E-13 |
| [ENSCAFG00000015747](http://www.ensembl.org/id/ENSCAFG00000015747) | MINK1 | 93.30103265 | -3.165726048 | 4.40376E-11 |
| [ENSCAFG00000001699](http://www.ensembl.org/id/ENSCAFG00000001699) | OSTF1 | 92.47946233 | -1.713027929 | 4.13414E-05 |
| [ENSCAFG00000011216](http://www.ensembl.org/id/ENSCAFG00000011216) | HADH | 91.94535755 | -2.428358317 | 7.52474E-08 |
| [ENSCAFG00000010058](http://www.ensembl.org/id/ENSCAFG00000010058) | SYT8 | 91.92283861 | -4.078832472 | 0.001856021 |
| [ENSCAFG00000016755](http://www.ensembl.org/id/ENSCAFG00000016755) | CRABP2 | 90.08116673 | -1.610859373 | 0.044635433 |
| [ENSCAFG00000010163](http://www.ensembl.org/id/ENSCAFG00000010163) | FAM3B | 88.80701186 | -7.276605709 | 0 |
| [ENSCAFG00000012743](http://www.ensembl.org/id/ENSCAFG00000012743) | OAT | 87.77434111 | -2.450341834 | 1.22625E-07 |
| [ENSCAFG00000014354](http://www.ensembl.org/id/ENSCAFG00000014354) | VSIR | 86.43294196 | -2.040111805 | 0.000127905 |
| [ENSCAFG00000002500](http://www.ensembl.org/id/ENSCAFG00000002500) | SLC2A1 | 84.88319613 | -1.456087607 | 0.041714159 |
| [ENSCAFG00000025512](http://www.ensembl.org/id/ENSCAFG00000025512) | SERPINB6 | 84.45960509 | -2.534401729 | 1.14842E-05 |
| [ENSCAFG00000003386](http://www.ensembl.org/id/ENSCAFG00000003386) | YWHAQ | 84.3111615 | -1.064624501 | 0.034666213 |
| [ENSCAFG00000005593](http://www.ensembl.org/id/ENSCAFG00000005593) | NCCRP1 | 82.22099537 | -9.355733866 | 0 |
| [ENSCAFG00000010547](http://www.ensembl.org/id/ENSCAFG00000010547) | COL17A1 | 81.8956081 | -6.941030185 | 0 |
| [ENSCAFG00000005426](http://www.ensembl.org/id/ENSCAFG00000005426) | RNASE4 | 80.30391332 | -3.881330864 | 2.37607E-11 |
| [ENSCAFG00000014027](http://www.ensembl.org/id/ENSCAFG00000014027) | LANCL1 | 80.23384803 | -2.207529495 | 3.33954E-05 |
| [ENSCAFG00000016850](http://www.ensembl.org/id/ENSCAFG00000016850) | GDPD2 | 77.85340637 | -8.802339306 | 0 |
| [ENSCAFG00000016741](http://www.ensembl.org/id/ENSCAFG00000016741) | HDGF | 77.30761939 | -1.323124105 | 0.009972337 |
| [ENSCAFG00000007060](http://www.ensembl.org/id/ENSCAFG00000007060) | SDR16C5 | 76.90958799 | -4.952598006 | 0 |
| [ENSCAFG00000000909](http://www.ensembl.org/id/ENSCAFG00000000909) | TTLL12 | 74.70934575 | -2.188248785 | 7.40639E-07 |
| [ENSCAFG00000031582](http://www.ensembl.org/id/ENSCAFG00000031582) | EHF | 74.20591096 | -8.795046291 | 0 |
| [ENSCAFG00000019530](http://www.ensembl.org/id/ENSCAFG00000019530) | PAXX | 73.47101871 | -1.073389485 | 0.017524556 |
| [ENSCAFG00000005419](http://www.ensembl.org/id/ENSCAFG00000005419) | PNP | 71.98307344 | -1.661583397 | 0.005463392 |
| [ENSCAFG00000003647](http://www.ensembl.org/id/ENSCAFG00000003647) | FAM84A | 71.77350126 | -6.674520814 | 0 |
| [ENSCAFG00000004129](http://www.ensembl.org/id/ENSCAFG00000004129) | ENDOD1 | 71.64864477 | -2.257100698 | 5.0862E-09 |
| [ENSCAFG00000016124](http://www.ensembl.org/id/ENSCAFG00000016124) | CLDN7 | 71.28433678 | -8.835003177 | 0 |
| [ENSCAFG00000012683](http://www.ensembl.org/id/ENSCAFG00000012683) | TSTD1 | 70.98632801 | -4.012862225 | 6.13018E-13 |
| [ENSCAFG00000014749](http://www.ensembl.org/id/ENSCAFG00000014749) | ANXA7 | 70.74129216 | -1.848672504 | 0.00013533 |
| [ENSCAFG00000023582](http://www.ensembl.org/id/ENSCAFG00000023582) | SERPINB10 | 70.71178464 | -5.569536657 | 4.76952E-14 |
| [ENSCAFG00000001815](http://www.ensembl.org/id/ENSCAFG00000001815) | GDA | 70.50485567 | -6.832127371 | 0 |
| [ENSCAFG00000000766](http://www.ensembl.org/id/ENSCAFG00000000766) | PPT2 | 70.44192242 | -2.56600085 | 3.15943E-10 |
| [ENSCAFG00000014533](http://www.ensembl.org/id/ENSCAFG00000014533) | SEPT5 | 70.22278899 | -2.335224023 | 2.94976E-06 |
| [ENSCAFG00000010602](http://www.ensembl.org/id/ENSCAFG00000010602) | ELF3 | 69.65664412 | -4.720917402 | 1.05103E-08 |
| [ENSCAFG00000005175](http://www.ensembl.org/id/ENSCAFG00000005175) | SCEL | 69.64286873 | -7.742400007 | 0 |
| [ENSCAFG00000012304](http://www.ensembl.org/id/ENSCAFG00000012304) | PPP2R5A | 69.58689921 | -2.301161715 | 1.94216E-08 |
| [ENSCAFG00000004112](http://www.ensembl.org/id/ENSCAFG00000004112) | NAPA | 69.51143412 | -1.337984848 | 0.0027515 |
| [ENSCAFG00000000274](http://www.ensembl.org/id/ENSCAFG00000000274) | HEBP2 | 69.09456765 | -3.759529488 | 0 |
| [ENSCAFG00000020062](http://www.ensembl.org/id/ENSCAFG00000020062) | DPYD | 68.95561188 | -2.255447043 | 4.61852E-05 |
| [ENSCAFG00000004755](http://www.ensembl.org/id/ENSCAFG00000004755) | ETHE1 | 68.75318101 | -2.871708818 | 6.4223E-12 |
| [ENSCAFG00000023194](http://www.ensembl.org/id/ENSCAFG00000023194) | PADI1 | 68.73411143 | -3.144996447 | 0.016475277 |
| [ENSCAFG00000004000](http://www.ensembl.org/id/ENSCAFG00000004000) | SYPL1 | 67.95714016 | -1.231133443 | 0.029399014 |
| [ENSCAFG00000013715](http://www.ensembl.org/id/ENSCAFG00000013715) | DUOX1 | 67.44589578 | -5.137447118 | 1.20469E-10 |
| [ENSCAFG00000001104](http://www.ensembl.org/id/ENSCAFG00000001104) | RANGAP1 | 67.31270656 | -2.538070408 | 1.00371E-09 |
| [ENSCAFG00000019355](http://www.ensembl.org/id/ENSCAFG00000019355) | PLEKHN1 | 66.84102914 | -4.443524281 | 0 |
| [ENSCAFG00000012666](http://www.ensembl.org/id/ENSCAFG00000012666) | F11R | 66.72666812 | -2.121418265 | 6.06829E-05 |
| [ENSCAFG00000004931](http://www.ensembl.org/id/ENSCAFG00000004931) | PLCD1 | 66.58402991 | -2.250113397 | 1.88392E-05 |
| [ENSCAFG00000003578](http://www.ensembl.org/id/ENSCAFG00000003578) | EPHA1 | 66.45172064 | -7.946281305 | 0 |
| [ENSCAFG00000014333](http://www.ensembl.org/id/ENSCAFG00000014333) | S100P | 65.51219696 | -1.595928621 | 0.017269961 |
| [ENSCAFG00000002883](http://www.ensembl.org/id/ENSCAFG00000002883) | KLK13 | 65.02592188 | -10.13612317 | 0 |
| [ENSCAFG00000015611](http://www.ensembl.org/id/ENSCAFG00000015611) | KIF1C | 64.90027462 | -1.951519688 | 4.80564E-05 |
| [ENSCAFG00000005069](http://www.ensembl.org/id/ENSCAFG00000005069) | PTPRF | 64.48967628 | -2.530576994 | 0.000173504 |
| [ENSCAFG00000010700](http://www.ensembl.org/id/ENSCAFG00000010700) | CCND1 | 64.45242152 | -1.350822552 | 0.028119197 |
| [ENSCAFG00000031667](http://www.ensembl.org/id/ENSCAFG00000031667) | ADH4 | 63.99430127 | -4.158050237 | 0 |
| [ENSCAFG00000009305](http://www.ensembl.org/id/ENSCAFG00000009305) | ESRP1 | 63.92067475 | -5.892612427 | 0 |
| [ENSCAFG00000014355](http://www.ensembl.org/id/ENSCAFG00000014355) | NCKAP1 | 63.71132487 | -1.234613218 | 0.046486939 |
| [ENSCAFG00000020305](http://www.ensembl.org/id/ENSCAFG00000020305) | CDH1 | 63.26463408 | -2.395243729 | 0.010244642 |
| [ENSCAFG00000003314](http://www.ensembl.org/id/ENSCAFG00000003314) | ANXA4 | 61.72442895 | -1.822750401 | 0.000298742 |
| [ENSCAFG00000007954](http://www.ensembl.org/id/ENSCAFG00000007954) | TNKS1BP1 | 61.1763486 | -2.499575858 | 2.86357E-07 |
| [ENSCAFG00000014729](http://www.ensembl.org/id/ENSCAFG00000014729) | OTUB1_2 | 61.10468207 | -1.641032845 | 4.86287E-05 |
| [ENSCAFG00000010593](http://www.ensembl.org/id/ENSCAFG00000010593) | GSTO1 | 60.7709219 | -2.290768346 | 1.36754E-05 |
| [ENSCAFG00000011544](http://www.ensembl.org/id/ENSCAFG00000011544) | AOX4 | 60.56542979 | -14.72852032 | 0 |
| [ENSCAFG00000016091](http://www.ensembl.org/id/ENSCAFG00000016091) | SNCG | 60.21504461 | -4.637080521 | 5.39461E-12 |
| [ENSCAFG00000019529](http://www.ensembl.org/id/ENSCAFG00000019529) | NDUFS7 | 59.80033289 | -1.199074375 | 0.033529517 |
| [ENSCAFG00000012381](http://www.ensembl.org/id/ENSCAFG00000012381) | BNIPL | 59.66141244 | -7.187272907 | 0 |
| [ENSCAFG00000016450](http://www.ensembl.org/id/ENSCAFG00000016450) | RAB24 | 58.98198446 | -2.007556283 | 7.26622E-06 |
| [ENSCAFG00000017344](http://www.ensembl.org/id/ENSCAFG00000017344) | CLINT1 | 58.43746726 | -2.058079961 | 1.9538E-05 |
| [ENSCAFG00000014570](http://www.ensembl.org/id/ENSCAFG00000014570) | ACAT1 | 58.38788924 | -1.984129229 | 1.26468E-05 |
| [ENSCAFG00000019598](http://www.ensembl.org/id/ENSCAFG00000019598) | G6PD | 57.89501317 | -1.914600873 | 0.000110533 |
| [ENSCAFG00000010516](http://www.ensembl.org/id/ENSCAFG00000010516) | SLK | 57.85520094 | -2.583989001 | 1.39184E-07 |
| [ENSCAFG00000030403](http://www.ensembl.org/id/ENSCAFG00000030403) | LRAT | 57.67829118 | -5.723888362 | 0 |
| [ENSCAFG00000002794](http://www.ensembl.org/id/ENSCAFG00000002794) | TMPRSS11D | 56.92664447 | -9.634077799 | 0 |
| [ENSCAFG00000013089](http://www.ensembl.org/id/ENSCAFG00000013089) | PLBD1 | 56.49766802 | -2.668155231 | 0.000155617 |
| [ENSCAFG00000028839](http://www.ensembl.org/id/ENSCAFG00000028839) | RAB18 | 56.32364023 | -1.12267187 | 0.049603636 |
| [ENSCAFG00000007050](http://www.ensembl.org/id/ENSCAFG00000007050) | RARG | 56.09045429 | -2.58497387 | 2.53249E-08 |
| [ENSCAFG00000013460](http://www.ensembl.org/id/ENSCAFG00000013460) | C1orf21 | 55.99985834 | -1.171944482 | 0.032645991 |
| [ENSCAFG00000008005](http://www.ensembl.org/id/ENSCAFG00000008005) | CHST2 | 55.45352498 | -4.181653073 | 0 |
| [ENSCAFG00000005133](http://www.ensembl.org/id/ENSCAFG00000005133) | LTBP4 | 55.42199459 | -2.809085534 | 4.31452E-05 |
| [ENSCAFG00000008019](http://www.ensembl.org/id/ENSCAFG00000008019) | SH3D19 | 55.42055596 | -2.853271142 | 4.78719E-10 |
| [ENSCAFG00000002994](http://www.ensembl.org/id/ENSCAFG00000002994) | NT5E | 55.40213394 | -2.217579669 | 0.001037908 |
| [ENSCAFG00000009647](http://www.ensembl.org/id/ENSCAFG00000009647) | REEP4 | 55.2118526 | -2.059689291 | 7.33763E-06 |
| [ENSCAFG00000011513](http://www.ensembl.org/id/ENSCAFG00000011513) | ABLIM1 | 54.92778184 | -3.171852547 | 7.74265E-09 |
| [ENSCAFG00000019059](http://www.ensembl.org/id/ENSCAFG00000019059) | UBXN6 | 54.70036987 | -1.284681652 | 0.004691735 |
| [ENSCAFG00000019926](http://www.ensembl.org/id/ENSCAFG00000019926) | AIF1L | 54.65712009 | -2.333817574 | 0.001199453 |
| [ENSCAFG00000020249](http://www.ensembl.org/id/ENSCAFG00000020249) | CLCA2 | 54.48585804 | -8.190137593 | 0 |
| [ENSCAFG00000002641](http://www.ensembl.org/id/ENSCAFG00000002641) | TTC7A | 54.45605779 | -1.533008857 | 0.004538754 |
| [ENSCAFG00000010575](http://www.ensembl.org/id/ENSCAFG00000010575) | SELENOS | 54.4275966 | -1.066580215 | 0.043195719 |
| [ENSCAFG00000007025](http://www.ensembl.org/id/ENSCAFG00000007025) | KRTDAP | 54.33789416 | -11.09403133 | 0 |
| [ENSCAFG00000032451](http://www.ensembl.org/id/ENSCAFG00000032451) | ARPC5L | 54.29925463 | -1.24325689 | 0.022628495 |
| [ENSCAFG00000000860](http://www.ensembl.org/id/ENSCAFG00000000860) | AFDN | 54.17802486 | -3.007385078 | 4.01247E-08 |
| [ENSCAFG00000023006](http://www.ensembl.org/id/ENSCAFG00000023006) | ALOX12 | 54.06128613 | -9.164408556 | 0 |
| [ENSCAFG00000012334](http://www.ensembl.org/id/ENSCAFG00000012334) | CABP7 | 53.76159879 | -9.567082013 | 0 |
| [ENSCAFG00000005461](http://www.ensembl.org/id/ENSCAFG00000005461) | NDRG2 | 53.09424504 | -3.271683398 | 4.61926E-08 |
| [ENSCAFG00000008626](http://www.ensembl.org/id/ENSCAFG00000008626) | P2RY1 | 52.78544296 | -5.346063143 | 6.24922E-13 |
| [ENSCAFG00000030784](http://www.ensembl.org/id/ENSCAFG00000030784) | LAD1 | 52.65142816 | -6.891889737 | 0 |
| [ENSCAFG00000023491](http://www.ensembl.org/id/ENSCAFG00000023491) | C1orf56 | 52.63065403 | -6.386077061 | 0 |
| [ENSCAFG00000009822](http://www.ensembl.org/id/ENSCAFG00000009822) | HTATIP2 | 52.45429966 | -2.31882689 | 4.22204E-08 |
| [ENSCAFG00000011669](http://www.ensembl.org/id/ENSCAFG00000011669) | SRSF4 | 51.62802606 | -1.098398628 | 0.025810186 |
| [ENSCAFG00000018089](http://www.ensembl.org/id/ENSCAFG00000018089) | DSC3 | 51.40139622 | -6.648335402 | 0 |
| [ENSCAFG00000002469](http://www.ensembl.org/id/ENSCAFG00000002469) | NANS | 50.51253595 | -1.081025344 | 0.043594412 |
| [ENSCAFG00000018999](http://www.ensembl.org/id/ENSCAFG00000018999) | TTC22 | 50.29803546 | -11.1495017 | 0 |
| [ENSCAFG00000013707](http://www.ensembl.org/id/ENSCAFG00000013707) | DUOXA1 | 50.21815698 | -7.019517562 | 0 |
| [ENSCAFG00000017095](http://www.ensembl.org/id/ENSCAFG00000017095) | YPEL3 | 50.0670263 | -1.687434464 | 0.000880543 |
| [ENSCAFG00000004080](http://www.ensembl.org/id/ENSCAFG00000004080) | NOP53 | 49.67948037 | -1.847665639 | 0.000279446 |
| [ENSCAFG00000000386](http://www.ensembl.org/id/ENSCAFG00000000386) | ARG1 | 49.60814265 | -6.277971196 | 0 |
| [ENSCAFG00000010211](http://www.ensembl.org/id/ENSCAFG00000010211) | MBOAT1 | 49.52901996 | -3.918167764 | 0 |
| [ENSCAFG00000003849](http://www.ensembl.org/id/ENSCAFG00000003849) | OSBPL9 | 49.36905672 | -1.610323689 | 8.74701E-05 |
| [ENSCAFG00000013411](http://www.ensembl.org/id/ENSCAFG00000013411) | ECHS1 | 49.15428398 | -1.052084232 | 0.040022144 |
| [ENSCAFG00000015999](http://www.ensembl.org/id/ENSCAFG00000015999) | KRT23 | 49.09132421 | -10.393661 | 0 |
| [ENSCAFG00000016011](http://www.ensembl.org/id/ENSCAFG00000016011) | EPHA2 | 49.044401 | -1.372036997 | 0.047481484 |
| [ENSCAFG00000000457](http://www.ensembl.org/id/ENSCAFG00000000457) | TMEM19 | 48.85473627 | -1.895754801 | 4.90642E-05 |
| [ENSCAFG00000023655](http://www.ensembl.org/id/ENSCAFG00000023655) | SULT1C4 | 48.84503942 | -1.87039097 | 3.13313E-05 |
| [ENSCAFG00000016990](http://www.ensembl.org/id/ENSCAFG00000016990) | CA12 | 48.78485489 | -1.952274513 | 0.035031166 |
| [ENSCAFG00000010807](http://www.ensembl.org/id/ENSCAFG00000010807) | PDCD4 | 47.89393159 | -2.016288725 | 3.89445E-06 |
| [ENSCAFG00000012306](http://www.ensembl.org/id/ENSCAFG00000012306) | SPTBN2 | 47.49138337 | -7.366144613 | 0 |
| [ENSCAFG00000012169](http://www.ensembl.org/id/ENSCAFG00000012169) | SYTL1 | 47.40785241 | -5.728325717 | 0 |
| [ENSCAFG00000017050](http://www.ensembl.org/id/ENSCAFG00000017050) | ACSF2 | 47.2792439 | -1.678985469 | 0.004567206 |
| [ENSCAFG00000004093](http://www.ensembl.org/id/ENSCAFG00000004093) | MGLL | 46.6171975 | -2.783437849 | 9.60809E-10 |
| [ENSCAFG00000013401](http://www.ensembl.org/id/ENSCAFG00000013401) | YBX3 | 46.32004991 | -2.031065337 | 2.7134E-05 |
| [ENSCAFG00000002919](http://www.ensembl.org/id/ENSCAFG00000002919) | EFEMP1 | 46.10738472 | -2.142114263 | 0.000280597 |
| [ENSCAFG00000015203](http://www.ensembl.org/id/ENSCAFG00000015203) | PLEKHG6 | 45.85035153 | -6.179629637 | 0 |
| [ENSCAFG00000007470](http://www.ensembl.org/id/ENSCAFG00000007470) | IL20RB | 45.78583859 | -7.475325507 | 0 |
| [ENSCAFG00000012994](http://www.ensembl.org/id/ENSCAFG00000012994) | GRHL3 | 45.50188756 | -6.302418543 | 0 |
| [ENSCAFG00000029187](http://www.ensembl.org/id/ENSCAFG00000029187) | RHOV | 45.30762005 | -7.537606319 | 0 |
| [ENSCAFG00000013917](http://www.ensembl.org/id/ENSCAFG00000013917) | HK1 | 44.78755669 | -1.263506764 | 0.049937305 |
| [ENSCAFG00000017037](http://www.ensembl.org/id/ENSCAFG00000017037) | MUC1 | 44.44088729 | -8.588611826 | 0 |
| [ENSCAFG00000001050](http://www.ensembl.org/id/ENSCAFG00000001050) | MTSS1 | 44.01579034 | -2.328872872 | 1.01505E-05 |
| [ENSCAFG00000005049](http://www.ensembl.org/id/ENSCAFG00000005049) | CYP2S1 | 43.98564679 | -6.256130234 | 0 |
| [ENSCAFG00000018655](http://www.ensembl.org/id/ENSCAFG00000018655) | TMEM97 | 43.89164068 | -1.46726253 | 0.008226894 |
| [ENSCAFG00000012722](http://www.ensembl.org/id/ENSCAFG00000012722) | NECTIN4 | 43.51791614 | -8.500449702 | 0 |
| [ENSCAFG00000007035](http://www.ensembl.org/id/ENSCAFG00000007035) | MFSD5 | 42.68232293 | -1.455777929 | 0.000629593 |
| [ENSCAFG00000003710](http://www.ensembl.org/id/ENSCAFG00000003710) | CRYBG1 | 42.60738134 | -3.082245136 | 4.34405E-08 |
| [ENSCAFG00000004721](http://www.ensembl.org/id/ENSCAFG00000004721) | PDCD6IP | 42.5376066 | -1.458778878 | 0.007022798 |
| [ENSCAFG00000016694](http://www.ensembl.org/id/ENSCAFG00000016694) | NOP16 | 42.47509695 | -1.763468901 | 0.00046433 |
| [ENSCAFG00000013961](http://www.ensembl.org/id/ENSCAFG00000013961) | TP63 | 42.46840701 | -8.07667911 | 0 |
| [ENSCAFG00000015450](http://www.ensembl.org/id/ENSCAFG00000015450) | HS3ST1 | 42.33630969 | -4.831068594 | 0 |
| [ENSCAFG00000007216](http://www.ensembl.org/id/ENSCAFG00000007216) | FAM3D | 42.15501103 | -8.803523301 | 0 |
| [ENSCAFG00000029919](http://www.ensembl.org/id/ENSCAFG00000029919) | CLIC3 | 42.02216527 | -4.265788985 | 0 |
| [ENSCAFG00000002494](http://www.ensembl.org/id/ENSCAFG00000002494) | GALNT12 | 41.89259721 | -3.826535249 | 0 |
| [ENSCAFG00000003156](http://www.ensembl.org/id/ENSCAFG00000003156) | MYH14 | 41.74616668 | -3.679406542 | 1.67156E-14 |
| [ENSCAFG00000013439](http://www.ensembl.org/id/ENSCAFG00000013439) | SLC5A1 | 41.68426716 | -8.934676382 | 0 |
| [ENSCAFG00000008830](http://www.ensembl.org/id/ENSCAFG00000008830) | TRAFD1 | 41.66286054 | -1.347358536 | 0.013687643 |
| [ENSCAFG00000019838](http://www.ensembl.org/id/ENSCAFG00000019838) | RXRA | 41.6619595 | -1.862052781 | 0.000187573 |
| [ENSCAFG00000005283](http://www.ensembl.org/id/ENSCAFG00000005283) | CLIP4 | 41.60297447 | -5.158483888 | 0 |
| [ENSCAFG00000019506](http://www.ensembl.org/id/ENSCAFG00000019506) | CIRBP | 41.14624746 | -1.619024353 | 0.001046269 |
| [ENSCAFG00000009529](http://www.ensembl.org/id/ENSCAFG00000009529) | NUDT9 | 40.89428122 | -1.210042939 | 0.00639449 |
| [ENSCAFG00000005625](http://www.ensembl.org/id/ENSCAFG00000005625) | STK24 | 40.81054205 | -1.575707414 | 0.000733311 |
| [ENSCAFG00000011331](http://www.ensembl.org/id/ENSCAFG00000011331) | ANKRD35 | 40.40621862 | -7.443869519 | 0 |
| [ENSCAFG00000015073](http://www.ensembl.org/id/ENSCAFG00000015073) | ATL3 | 40.39053242 | -1.307457771 | 0.037241803 |
| [ENSCAFG00000006497](http://www.ensembl.org/id/ENSCAFG00000006497) | PKP3 | 40.07215199 | -6.367002512 | 0 |
| [ENSCAFG00000002318](http://www.ensembl.org/id/ENSCAFG00000002318) | ARL4A | 39.97048389 | -2.587723812 | 4.29355E-06 |
| [ENSCAFG00000019429](http://www.ensembl.org/id/ENSCAFG00000019429) | MKNK2 | 39.93535594 | -1.420158403 | 0.005476618 |
| [ENSCAFG00000005693](http://www.ensembl.org/id/ENSCAFG00000005693) | MZB1 | 39.8916199 | -3.506331273 | 2.12868E-06 |
| [ENSCAFG00000003394](http://www.ensembl.org/id/ENSCAFG00000003394) | GRHL1 | 39.79987313 | -4.780505725 | 0 |
| [ENSCAFG00000032746](http://www.ensembl.org/id/ENSCAFG00000032746) | MXD1 | 39.79435693 | -2.202967582 | 0.000272618 |
| [ENSCAFG00000000474](http://www.ensembl.org/id/ENSCAFG00000000474) | CDSN | 39.76682735 | -11.85574382 | 0 |
| [ENSCAFG00000006528](http://www.ensembl.org/id/ENSCAFG00000006528) | RASSF7 | 39.58831186 | -3.676948869 | 3.22992E-14 |
| [ENSCAFG00000018415](http://www.ensembl.org/id/ENSCAFG00000018415) | MOCS2 | 39.51476022 | -1.69546925 | 0.000439967 |
| [ENSCAFG00000020320](http://www.ensembl.org/id/ENSCAFG00000020320) | ESRP2 | 39.50157807 | -7.693655986 | 0 |
| [ENSCAFG00000016662](http://www.ensembl.org/id/ENSCAFG00000016662) | SOX15 | 39.47297421 | -9.51471629 | 0 |
| [ENSCAFG00000000285](http://www.ensembl.org/id/ENSCAFG00000000285) | CITED2 | 39.17010003 | -2.233349128 | 6.80217E-06 |
| [ENSCAFG00000018707](http://www.ensembl.org/id/ENSCAFG00000018707) | RALBP1 | 39.15141683 | -1.036008759 | 0.048604189 |
| [ENSCAFG00000010732](http://www.ensembl.org/id/ENSCAFG00000010732) | CAB39 | 39.12944471 | -1.160217867 | 0.029263589 |
| [ENSCAFG00000020393](http://www.ensembl.org/id/ENSCAFG00000020393) | ACADM | 39.09473871 | -2.039557102 | 9.57037E-06 |
| [ENSCAFG00000010281](http://www.ensembl.org/id/ENSCAFG00000010281) | MAPKAPK3 | 39.02142869 | -1.406077824 | 0.003083017 |
| [ENSCAFG00000029045](http://www.ensembl.org/id/ENSCAFG00000029045) | ACSL3 | 38.80709082 | -2.06487497 | 3.94747E-05 |
| [ENSCAFG00000012729](http://www.ensembl.org/id/ENSCAFG00000012729) | CGN | 38.80144712 | -7.775395193 | 0 |
| [ENSCAFG00000011960](http://www.ensembl.org/id/ENSCAFG00000011960) | C1orf198 | 38.73926802 | -1.328442885 | 0.016927017 |
| [ENSCAFG00000006612](http://www.ensembl.org/id/ENSCAFG00000006612) | SUCLG2 | 38.72739499 | -1.18359406 | 0.029549886 |
| [ENSCAFG00000009365](http://www.ensembl.org/id/ENSCAFG00000009365) | SPINT1 | 38.580219 | -3.827957932 | 0 |
| [ENSCAFG00000000257](http://www.ensembl.org/id/ENSCAFG00000000257) | IL20RA | 38.49181689 | -8.348959308 | 0 |
| [ENSCAFG00000019698](http://www.ensembl.org/id/ENSCAFG00000019698) | PALM | 38.33094558 | -3.243549741 | 1.14783E-06 |
| [ENSCAFG00000002797](http://www.ensembl.org/id/ENSCAFG00000002797) | KLF4 | 38.25340232 | -2.388497404 | 0.00123748 |
| [ENSCAFG00000011967](http://www.ensembl.org/id/ENSCAFG00000011967) | SMPDL3B | 38.21618713 | -9.918698068 | 0 |
| [ENSCAFG00000017100](http://www.ensembl.org/id/ENSCAFG00000017100) | ADAM15 | 38.0581248 | -1.982634605 | 8.51773E-06 |
| [ENSCAFG00000029753](http://www.ensembl.org/id/ENSCAFG00000029753) | SPINK7 | 38.03730634 | -9.855097766 | 0 |
| [ENSCAFG00000002941](http://www.ensembl.org/id/ENSCAFG00000002941) | ME1 | 37.97758915 | -2.417819036 | 0.000142733 |
| [ENSCAFG00000002663](http://www.ensembl.org/id/ENSCAFG00000002663) | CD109 | 37.81764317 | -1.985121046 | 0.001275954 |
| [ENSCAFG00000013017](http://www.ensembl.org/id/ENSCAFG00000013017) | CYB561 | 37.8047674 | -2.278068053 | 1.71837E-08 |
| [ENSCAFG00000002809](http://www.ensembl.org/id/ENSCAFG00000002809) | HMGN3 | 37.73121199 | -1.560967834 | 0.003104116 |
| [ENSCAFG00000007898](http://www.ensembl.org/id/ENSCAFG00000007898) | CLIP1 | 37.65033039 | -1.73930443 | 0.000605242 |
| [ENSCAFG00000012199](http://www.ensembl.org/id/ENSCAFG00000012199) | BAG3 | 37.34806848 | -1.646813445 | 0.00065473 |
| [ENSCAFG00000009147](http://www.ensembl.org/id/ENSCAFG00000009147) | ARHGAP1 | 37.33395459 | -1.127934927 | 0.019107747 |
| [ENSCAFG00000009181](http://www.ensembl.org/id/ENSCAFG00000009181) | RAPGEF3 | 37.28990522 | -3.595357246 | 1.08164E-13 |
| [ENSCAFG00000016295](http://www.ensembl.org/id/ENSCAFG00000016295) | GIPC1 | 37.08420891 | -1.307780504 | 0.036916471 |
| [ENSCAFG00000003194](http://www.ensembl.org/id/ENSCAFG00000003194) | HERPUD2 | 37.0768129 | -1.154853008 | 0.019587082 |
| [ENSCAFG00000017438](http://www.ensembl.org/id/ENSCAFG00000017438) | RAB3D | 36.72495541 | -3.105058258 | 4.37947E-09 |
| [ENSCAFG00000032391](http://www.ensembl.org/id/ENSCAFG00000032391) | FAM83H | 36.59401055 | -2.654537395 | 3.16338E-06 |
| [ENSCAFG00000000612](http://www.ensembl.org/id/ENSCAFG00000000612) | SBF1 | 36.47224343 | -1.452011596 | 0.0023047 |
| [ENSCAFG00000028617](http://www.ensembl.org/id/ENSCAFG00000028617) | TMPRSS11E | 36.42410118 | -7.352274898 | 0 |
| [ENSCAFG00000007637](http://www.ensembl.org/id/ENSCAFG00000007637) | ACSS2 | 36.23731897 | -1.395629292 | 0.007986088 |
| [ENSCAFG00000010213](http://www.ensembl.org/id/ENSCAFG00000010213) | RIPK4 | 35.78680706 | -7.856906774 | 0 |
| [ENSCAFG00000000927](http://www.ensembl.org/id/ENSCAFG00000000927) | HSD17B8 | 35.65123827 | -1.389354221 | 0.006803088 |
| [ENSCAFG00000010413](http://www.ensembl.org/id/ENSCAFG00000010413) | TMEM54 | 35.63985487 | -5.580536098 | 0 |
| [ENSCAFG00000000472](http://www.ensembl.org/id/ENSCAFG00000000472) | C6orf15 | 35.51311619 | -10.76461291 | 0 |
| [ENSCAFG00000000720](http://www.ensembl.org/id/ENSCAFG00000000720) | ACAT2 | 35.42459855 | -1.579348051 | 0.000725346 |
| [ENSCAFG00000011957](http://www.ensembl.org/id/ENSCAFG00000011957) | LSS | 35.39738951 | -2.512513862 | 6.45754E-07 |
| [ENSCAFG00000009945](http://www.ensembl.org/id/ENSCAFG00000009945) | ABHD14B | 35.39177341 | -2.238823856 | 1.17052E-05 |
| [ENSCAFG00000011814](http://www.ensembl.org/id/ENSCAFG00000011814) | RHOD | 35.14352903 | -2.753626216 | 5.49925E-10 |
| [ENSCAFG00000019095](http://www.ensembl.org/id/ENSCAFG00000019095) | STAP2 | 35.02659593 | -6.243554927 | 0 |
| [ENSCAFG00000012082](http://www.ensembl.org/id/ENSCAFG00000012082) | SEMA4B | 34.82667486 | -2.425607527 | 8.33104E-08 |
| [ENSCAFG00000010198](http://www.ensembl.org/id/ENSCAFG00000010198) | RAB7B | 34.64361981 | -2.820143552 | 1.10139E-06 |
| [ENSCAFG00000003606](http://www.ensembl.org/id/ENSCAFG00000003606) | GJB3 | 34.59357792 | -2.19195295 | 0.037479631 |
| [ENSCAFG00000011971](http://www.ensembl.org/id/ENSCAFG00000011971) | IRF6 | 34.49076457 | -7.991614378 | 0 |
| [ENSCAFG00000010111](http://www.ensembl.org/id/ENSCAFG00000010111) | NIPSNAP2 | 34.29330457 | -1.14272888 | 0.00962454 |
| [ENSCAFG00000003897](http://www.ensembl.org/id/ENSCAFG00000003897) | RNF11 | 34.25172077 | -1.709022088 | 0.000739285 |
| [ENSCAFG00000002289](http://www.ensembl.org/id/ENSCAFG00000002289) | BICD2 | 34.20136562 | -1.565245002 | 0.000820458 |
| [ENSCAFG00000006789](http://www.ensembl.org/id/ENSCAFG00000006789) | NSFL1C | 34.08925056 | -1.09515016 | 0.022022481 |
| [ENSCAFG00000019977](http://www.ensembl.org/id/ENSCAFG00000019977) | HSD17B2 | 34.03444573 | -9.10628083 | 0 |
| [ENSCAFG00000017401](http://www.ensembl.org/id/ENSCAFG00000017401) | POF1B | 33.84606903 | -12.73266555 | 0 |
| [ENSCAFG00000007358](http://www.ensembl.org/id/ENSCAFG00000007358) | KCTD15 | 33.80536447 | -1.346117476 | 0.003957024 |
| [ENSCAFG00000012523](http://www.ensembl.org/id/ENSCAFG00000012523) | CLDN4 | 33.50129554 | -6.457999422 | 0 |
| [ENSCAFG00000005927](http://www.ensembl.org/id/ENSCAFG00000005927) | DCXR | 33.44819785 | -1.243399004 | 0.030185177 |
| [ENSCAFG00000002852](http://www.ensembl.org/id/ENSCAFG00000002852) | ETFB | 33.39012543 | -1.665549402 | 5.40015E-05 |
| [ENSCAFG00000004459](http://www.ensembl.org/id/ENSCAFG00000004459) | PPP1R13L | 33.37160131 | -4.085268758 | 0 |
| [ENSCAFG00000013898](http://www.ensembl.org/id/ENSCAFG00000013898) | ANKK1 | 33.27515374 | -9.338431467 | 0 |
| [ENSCAFG00000016163](http://www.ensembl.org/id/ENSCAFG00000016163) | CHURC1 | 33.05444964 | -1.285906849 | 0.014963597 |
| [ENSCAFG00000009467](http://www.ensembl.org/id/ENSCAFG00000009467) | HIBCH | 32.99185895 | -1.66673742 | 0.00079392 |
| [ENSCAFG00000016970](http://www.ensembl.org/id/ENSCAFG00000016970) | MVP | 32.97574416 | -1.171407903 | 0.034522652 |
| [ENSCAFG00000011628](http://www.ensembl.org/id/ENSCAFG00000011628) | PITX2 | 32.96911738 | -4.957232468 | 4.22554E-13 |
| [ENSCAFG00000018245](http://www.ensembl.org/id/ENSCAFG00000018245) | FAM83G | 32.79341847 | -5.365068721 | 0 |
| [ENSCAFG00000006935](http://www.ensembl.org/id/ENSCAFG00000006935) | ELF5 | 32.75766934 | -9.374368486 | 0 |
| [ENSCAFG00000008903](http://www.ensembl.org/id/ENSCAFG00000008903) | ARFGAP2 | 32.64669532 | -1.089327573 | 0.017137072 |
| [ENSCAFG00000002850](http://www.ensembl.org/id/ENSCAFG00000002850) | OSBPL3 | 32.59808956 | -3.610051147 | 8.66135E-15 |
| [ENSCAFG00000012067](http://www.ensembl.org/id/ENSCAFG00000012067) | AP1B1 | 32.59031033 | -1.348905297 | 0.00317393 |
| [ENSCAFG00000019522](http://www.ensembl.org/id/ENSCAFG00000019522) | ENTPD2 | 32.51615768 | -5.800618823 | 4.98221E-12 |
| [ENSCAFG00000015843](http://www.ensembl.org/id/ENSCAFG00000015843) | PLD2 | 32.47620589 | -2.181432719 | 3.3399E-07 |
| [ENSCAFG00000009090](http://www.ensembl.org/id/ENSCAFG00000009090) | COQ2 | 32.34879589 | -1.777446991 | 1.9538E-05 |
| [ENSCAFG00000020112](http://www.ensembl.org/id/ENSCAFG00000020112) | ABCD3 | 32.25920398 | -1.929451206 | 3.60547E-06 |
| [ENSCAFG00000016574](http://www.ensembl.org/id/ENSCAFG00000016574) | PIP4K2B | 32.17792451 | -1.526976894 | 0.002951498 |
| [ENSCAFG00000019665](http://www.ensembl.org/id/ENSCAFG00000019665) | R3HDM4 | 32.14801536 | -2.088745114 | 7.05973E-06 |
| [ENSCAFG00000010630](http://www.ensembl.org/id/ENSCAFG00000010630) | COBLL1 | 32.11531019 | -1.804654636 | 0.000138975 |
| [ENSCAFG00000011091](http://www.ensembl.org/id/ENSCAFG00000011091) | XG | 32.11406428 | -1.803936383 | 0.003389003 |
| [ENSCAFG00000010804](http://www.ensembl.org/id/ENSCAFG00000010804) | SEMA3F | 31.891373 | -2.394858574 | 2.27326E-08 |
| [ENSCAFG00000011590](http://www.ensembl.org/id/ENSCAFG00000011590) | RPS6KB2 | 31.81530917 | -2.678423673 | 1.66387E-09 |
| [ENSCAFG00000002123](http://www.ensembl.org/id/ENSCAFG00000002123) | PON2 | 31.61072075 | -1.031564013 | 0.043432366 |
| [ENSCAFG00000012829](http://www.ensembl.org/id/ENSCAFG00000012829) | TMPRSS4 | 31.46008299 | -9.434065004 | 0 |
| [ENSCAFG00000006121](http://www.ensembl.org/id/ENSCAFG00000006121) | ATP2B1 | 31.35541412 | -1.375424887 | 0.009770031 |
| [ENSCAFG00000001501](http://www.ensembl.org/id/ENSCAFG00000001501) | CDC42EP1 | 31.27567581 | -1.169802117 | 0.047845247 |
| [ENSCAFG00000007758](http://www.ensembl.org/id/ENSCAFG00000007758) | GALNT6 | 31.09631754 | -3.543967982 | 1.92475E-09 |
| [ENSCAFG00000005090](http://www.ensembl.org/id/ENSCAFG00000005090) | AANAT | 30.89220658 | -11.21422557 | 0 |
| [ENSCAFG00000001305](http://www.ensembl.org/id/ENSCAFG00000001305) | FBP1 | 30.86099091 | -5.587249706 | 9.36204E-13 |
| [ENSCAFG00000013923](http://www.ensembl.org/id/ENSCAFG00000013923) | SUSD2 | 30.61340781 | -2.88243554 | 1.22075E-08 |
| [ENSCAFG00000001490](http://www.ensembl.org/id/ENSCAFG00000001490) | SH3BP1 | 30.54581267 | -1.899449411 | 0.000124446 |
| [ENSCAFG00000009427](http://www.ensembl.org/id/ENSCAFG00000009427) | PTPN13 | 30.53236872 | -2.008539361 | 0.002073138 |
| [ENSCAFG00000006975](http://www.ensembl.org/id/ENSCAFG00000006975) | PLK2 | 30.52260155 | -1.747820874 | 0.001460867 |
| [ENSCAFG00000001974](http://www.ensembl.org/id/ENSCAFG00000001974) | KANK1 | 30.42652532 | -2.45769311 | 6.75741E-06 |
| [ENSCAFG00000025374](http://www.ensembl.org/id/ENSCAFG00000025374) | EXO5 | 30.3998773 | -2.235898204 | 5.29282E-07 |
| [ENSCAFG00000018610](http://www.ensembl.org/id/ENSCAFG00000018610) | TRIP10 | 30.29877815 | -1.646784343 | 9.2149E-05 |
| [ENSCAFG00000005954](http://www.ensembl.org/id/ENSCAFG00000005954) | SUMF1 | 30.26325705 | -2.177765502 | 3.75833E-07 |
| [ENSCAFG00000031759](http://www.ensembl.org/id/ENSCAFG00000031759) | NAPRT | 30.19301835 | -2.67494891 | 4.95809E-06 |
| [ENSCAFG00000009506](http://www.ensembl.org/id/ENSCAFG00000009506) | ABI3BP | 30.12161603 | -3.67641582 | 2.21944E-06 |
| [ENSCAFG00000005466](http://www.ensembl.org/id/ENSCAFG00000005466) | KYNU | 30.07507193 | -6.749045979 | 0 |
| [ENSCAFG00000008438](http://www.ensembl.org/id/ENSCAFG00000008438) | EPHX2 | 29.96399416 | -4.034886823 | 0 |
| [ENSCAFG00000019880](http://www.ensembl.org/id/ENSCAFG00000019880) | GPSM2 | 29.94873858 | -1.777378316 | 0.000108192 |
| [ENSCAFG00000018292](http://www.ensembl.org/id/ENSCAFG00000018292) | ZFYVE21 | 29.89418574 | -1.320847972 | 0.014689971 |
| [ENSCAFG00000003612](http://www.ensembl.org/id/ENSCAFG00000003612) | GJB5 | 29.61015089 | -3.060077655 | 0.00050775 |
| [ENSCAFG00000012455](http://www.ensembl.org/id/ENSCAFG00000012455) | TREH | 29.56405015 | -8.549458864 | 0 |
| [ENSCAFG00000004966](http://www.ensembl.org/id/ENSCAFG00000004966) | MYD88 | 29.56191958 | -1.667784709 | 0.000819056 |
| [ENSCAFG00000011877](http://www.ensembl.org/id/ENSCAFG00000011877) | CSTA | 29.54043546 | -10.14908405 | 0 |
| [ENSCAFG00000005081](http://www.ensembl.org/id/ENSCAFG00000005081) | INSIG1 | 29.42275877 | -1.949750216 | 0.000923813 |
| [ENSCAFG00000004308](http://www.ensembl.org/id/ENSCAFG00000004308) | TRIM13 | 29.32957843 | -2.84337845 | 7.26721E-11 |
| [ENSCAFG00000016651](http://www.ensembl.org/id/ENSCAFG00000016651) | MPDU1 | 29.31000842 | -1.190755169 | 0.020042448 |
| [ENSCAFG00000028654](http://www.ensembl.org/id/ENSCAFG00000028654) | GNG12 | 29.26175045 | -2.443918759 | 0.000799207 |
| [ENSCAFG00000020063](http://www.ensembl.org/id/ENSCAFG00000020063) | SLC27A4 | 29.15297587 | -1.109848483 | 0.044846779 |
| [ENSCAFG00000023363](http://www.ensembl.org/id/ENSCAFG00000023363) | CNDP2 | 29.07806947 | -1.252261771 | 0.010827051 |
| [ENSCAFG00000017124](http://www.ensembl.org/id/ENSCAFG00000017124) | ZBTB7B | 29.05639447 | -1.742101856 | 7.84408E-05 |
| [ENSCAFG00000011458](http://www.ensembl.org/id/ENSCAFG00000011458) | LRMP | 29.04498102 | -4.779188461 | 0 |
| [ENSCAFG00000011273](http://www.ensembl.org/id/ENSCAFG00000011273) | SUN1 | 29.0155227 | -1.21556013 | 0.020413067 |
| [ENSCAFG00000019312](http://www.ensembl.org/id/ENSCAFG00000019312) | BICDL2 | 28.98819319 | -7.82788282 | 0 |
| [ENSCAFG00000017104](http://www.ensembl.org/id/ENSCAFG00000017104) | GDPD3 | 28.94879417 | -4.347563411 | 0 |
| [ENSCAFG00000005627](http://www.ensembl.org/id/ENSCAFG00000005627) | JAG1 | 28.83063249 | -2.2879469 | 1.62353E-06 |
| [ENSCAFG00000001448](http://www.ensembl.org/id/ENSCAFG00000001448) | PIM1 | 28.79752504 | -1.810202504 | 0.003077622 |
| [ENSCAFG00000007432](http://www.ensembl.org/id/ENSCAFG00000007432) | ATP12A | 28.65361365 | -11.94139841 | 0 |
| [ENSCAFG00000000145](http://www.ensembl.org/id/ENSCAFG00000000145) | RAB27B | 28.61134622 | -6.003524089 | 0 |
| [ENSCAFG00000011063](http://www.ensembl.org/id/ENSCAFG00000011063) | SERINC2 | 28.58209816 | -3.366987595 | 5.49254E-10 |
| [ENSCAFG00000013517](http://www.ensembl.org/id/ENSCAFG00000013517) | NBEAL2 | 28.45061301 | -3.38866348 | 1.67156E-14 |
| [ENSCAFG00000016107](http://www.ensembl.org/id/ENSCAFG00000016107) | NOTCH3 | 28.38470308 | -1.567883901 | 0.006947929 |
| [ENSCAFG00000002802](http://www.ensembl.org/id/ENSCAFG00000002802) | TMPRSS11A | 28.35601638 | -8.104809826 | 0 |
| [ENSCAFG00000016446](http://www.ensembl.org/id/ENSCAFG00000016446) | RDH12 | 28.3262372 | -7.560892775 | 0 |
| [ENSCAFG00000011772](http://www.ensembl.org/id/ENSCAFG00000011772) | EGLN1 | 28.16703695 | -1.225429412 | 0.013500951 |
| [ENSCAFG00000001438](http://www.ensembl.org/id/ENSCAFG00000001438) | PI16 | 28.13960666 | -2.233264831 | 0.039670467 |
| [ENSCAFG00000019279](http://www.ensembl.org/id/ENSCAFG00000019279) | GNA15 | 28.13241356 | -2.262272048 | 0.000554589 |
| [ENSCAFG00000011994](http://www.ensembl.org/id/ENSCAFG00000011994) | KREMEN1 | 27.93149663 | -2.714295067 | 1.41619E-08 |
| [ENSCAFG00000000603](http://www.ensembl.org/id/ENSCAFG00000000603) | NCAPH2 | 27.85701688 | -1.173714059 | 0.00962454 |
| [ENSCAFG00000014993](http://www.ensembl.org/id/ENSCAFG00000014993) | FGFR3 | 27.84154747 | -1.865543791 | 0.00770448 |
| [ENSCAFG00000005997](http://www.ensembl.org/id/ENSCAFG00000005997) | GPCPD1 | 27.77544614 | -1.451229936 | 0.003109139 |
| [ENSCAFG00000003388](http://www.ensembl.org/id/ENSCAFG00000003388) | SH3D21 | 27.70119398 | -3.848184298 | 6.29576E-13 |
| [ENSCAFG00000006660](http://www.ensembl.org/id/ENSCAFG00000006660) | SLC7A1 | 27.68884155 | -1.344565538 | 0.002038576 |
| [ENSCAFG00000010896](http://www.ensembl.org/id/ENSCAFG00000010896) | ARRDC4 | 27.68289591 | -2.911238229 | 9.63859E-11 |
| [ENSCAFG00000007328](http://www.ensembl.org/id/ENSCAFG00000007328) | KRT80 | 27.62915494 | -8.68144252 | 0 |
| [ENSCAFG00000032583](http://www.ensembl.org/id/ENSCAFG00000032583) | METTL7A | 27.55028134 | -1.834854811 | 0.0011796 |
| [ENSCAFG00000018868](http://www.ensembl.org/id/ENSCAFG00000018868) | MYO18A | 27.4347891 | -1.735567963 | 0.000719941 |
| [ENSCAFG00000015282](http://www.ensembl.org/id/ENSCAFG00000015282) | GGT6 | 27.38341327 | -8.535082222 | 0 |
| [ENSCAFG00000011930](http://www.ensembl.org/id/ENSCAFG00000011930) | CCNDBP1 | 27.28999241 | -2.275056166 | 3.48813E-06 |
| [ENSCAFG00000012845](http://www.ensembl.org/id/ENSCAFG00000012845) | TMPRSS13 | 27.28094265 | -9.770239081 | 0 |
| [ENSCAFG00000010483](http://www.ensembl.org/id/ENSCAFG00000010483) | STN1 | 27.22622315 | -3.290213003 | 1.30021E-11 |
| [ENSCAFG00000006979](http://www.ensembl.org/id/ENSCAFG00000006979) | MTUS1 | 27.21322414 | -2.336278483 | 8.60704E-06 |
| [ENSCAFG00000016249](http://www.ensembl.org/id/ENSCAFG00000016249) | PGM2 | 27.21130003 | -1.635387394 | 0.000919508 |
| [ENSCAFG00000013005](http://www.ensembl.org/id/ENSCAFG00000013005) | EPHB3 | 27.11155848 | -2.201478651 | 2.3175E-05 |
| [ENSCAFG00000020094](http://www.ensembl.org/id/ENSCAFG00000020094) | FAM102A | 27.06487682 | -1.593248803 | 0.000926814 |
| [ENSCAFG00000003465](http://www.ensembl.org/id/ENSCAFG00000003465) | EGFR | 27.01411517 | -3.644833353 | 1.67156E-14 |
| [ENSCAFG00000012630](http://www.ensembl.org/id/ENSCAFG00000012630) | CNKSR1 | 27.00110021 | -4.281848536 | 0 |
| [ENSCAFG00000013044](http://www.ensembl.org/id/ENSCAFG00000013044) | LIMK2 | 26.96976469 | -1.988030251 | 1.15278E-05 |
| [ENSCAFG00000017746](http://www.ensembl.org/id/ENSCAFG00000017746) | AP1M2 | 26.91699275 | -5.356706606 | 0 |
| [ENSCAFG00000007148](http://www.ensembl.org/id/ENSCAFG00000007148) | FBXO3 | 26.78636578 | -1.624605403 | 0.00041019 |
| [ENSCAFG00000018182](http://www.ensembl.org/id/ENSCAFG00000018182) | MMP28 | 26.68060269 | -1.888341611 | 0.005634546 |
| [ENSCAFG00000011929](http://www.ensembl.org/id/ENSCAFG00000011929) | CLK1 | 26.52614983 | -1.449912506 | 0.002600104 |
| [ENSCAFG00000018942](http://www.ensembl.org/id/ENSCAFG00000018942) | PLIN3 | 26.52586229 | -1.644080837 | 0.000478613 |
| [ENSCAFG00000015312](http://www.ensembl.org/id/ENSCAFG00000015312) | BST1 | 26.32039143 | -2.350317968 | 1.09753E-05 |
| [ENSCAFG00000013696](http://www.ensembl.org/id/ENSCAFG00000013696) | ALS2CL | 26.21858236 | -4.206422748 | 0 |
| [ENSCAFG00000008858](http://www.ensembl.org/id/ENSCAFG00000008858) | BMP2K | 26.19309893 | -1.500915403 | 0.00142824 |
| [ENSCAFG00000004773](http://www.ensembl.org/id/ENSCAFG00000004773) | AGAP3 | 26.17781286 | -1.587635632 | 0.001438492 |
| [ENSCAFG00000010071](http://www.ensembl.org/id/ENSCAFG00000010071) | PDLIM5 | 26.13081839 | -1.499067329 | 0.00639449 |
| [ENSCAFG00000005401](http://www.ensembl.org/id/ENSCAFG00000005401) | GPD1L | 26.09907992 | -3.153837149 | 6.28947E-14 |
| [ENSCAFG00000030690](http://www.ensembl.org/id/ENSCAFG00000030690) | ZBED2 | 26.08682324 | -6.297105636 | 0 |
| [ENSCAFG00000006409](http://www.ensembl.org/id/ENSCAFG00000006409) | SH3RF2 | 26.06971098 | -7.179493255 | 0 |
| [ENSCAFG00000007272](http://www.ensembl.org/id/ENSCAFG00000007272) | IL36RN | 26.01093733 | -9.341129084 | 0 |
| [ENSCAFG00000010028](http://www.ensembl.org/id/ENSCAFG00000010028) | IFITM10 | 25.98608387 | -3.512195068 | 1.43587E-06 |
| [ENSCAFG00000015429](http://www.ensembl.org/id/ENSCAFG00000015429) | PDIA2 | 25.85662469 | -7.110683038 | 0 |
| [ENSCAFG00000003324](http://www.ensembl.org/id/ENSCAFG00000003324) | ASPRV1 | 25.84697015 | -5.065571688 | 4.72857E-09 |
| [ENSCAFG00000024732](http://www.ensembl.org/id/ENSCAFG00000024732) | RUFY4 | 25.82301633 | -6.689425763 | 0 |
| [ENSCAFG00000019483](http://www.ensembl.org/id/ENSCAFG00000019483) | ANAPC2 | 25.72064788 | -1.919062312 | 1.34502E-05 |
| [ENSCAFG00000010219](http://www.ensembl.org/id/ENSCAFG00000010219) | TMEM45B | 25.7123222 | -10.13047238 | 0 |
| [ENSCAFG00000011824](http://www.ensembl.org/id/ENSCAFG00000011824) | B3GNT5 | 25.71219665 | -4.055454124 | 0 |
| [ENSCAFG00000019913](http://www.ensembl.org/id/ENSCAFG00000019913) | STXBP3 | 25.61632938 | -1.873805416 | 5.53027E-06 |
| [ENSCAFG00000002227](http://www.ensembl.org/id/ENSCAFG00000002227) | C1GALT1 | 25.55569358 | -3.078975639 | 0 |
| [ENSCAFG00000005241](http://www.ensembl.org/id/ENSCAFG00000005241) | NET1 | 25.45170491 | -2.164463243 | 2.80336E-06 |
| [ENSCAFG00000017069](http://www.ensembl.org/id/ENSCAFG00000017069) | EFNA1 | 25.32351887 | -1.973835008 | 0.000268876 |
| [ENSCAFG00000025075](http://www.ensembl.org/id/ENSCAFG00000025075) | DEFB1 | 25.19888469 | -5.092718554 | 2.87946E-06 |
| [ENSCAFG00000006406](http://www.ensembl.org/id/ENSCAFG00000006406) | AMDHD1 | 25.18347937 | -3.909249951 | 4.69386E-10 |
| [ENSCAFG00000009906](http://www.ensembl.org/id/ENSCAFG00000009906) | VSIG10 | 25.14775724 | -2.652337871 | 3.14075E-09 |
| [ENSCAFG00000008528](http://www.ensembl.org/id/ENSCAFG00000008528) | GPR87 | 25.11729782 | -7.518683088 | 0 |
| [ENSCAFG00000001627](http://www.ensembl.org/id/ENSCAFG00000001627) | KIFC2 | 25.09042673 | -1.247954808 | 0.028277234 |
| [ENSCAFG00000016836](http://www.ensembl.org/id/ENSCAFG00000016836) | TMEM79 | 25.07425408 | -2.691649342 | 1.54337E-09 |
| [ENSCAFG00000017776](http://www.ensembl.org/id/ENSCAFG00000017776) | ATG4D | 24.96259076 | -1.175086811 | 0.032785316 |
| [ENSCAFG00000023821](http://www.ensembl.org/id/ENSCAFG00000023821) | CYP2F1 | 24.91217599 | -10.64725496 | 0 |
| [ENSCAFG00000018754](http://www.ensembl.org/id/ENSCAFG00000018754) | FUT5 | 24.88587415 | -12.57521264 | 2.46133E-14 |
| [ENSCAFG00000005891](http://www.ensembl.org/id/ENSCAFG00000005891) | SIRT7 | 24.79863149 | -1.062124123 | 0.048813499 |
| [ENSCAFG00000001568](http://www.ensembl.org/id/ENSCAFG00000001568) | MOCS1 | 24.72848657 | -2.948120642 | 9.9902E-11 |
| [ENSCAFG00000019937](http://www.ensembl.org/id/ENSCAFG00000019937) | KIAA0513 | 24.71183418 | -2.449525036 | 3.27319E-07 |
| [ENSCAFG00000001442](http://www.ensembl.org/id/ENSCAFG00000001442) | MICALL1 | 24.60170669 | -1.687014652 | 6.6398E-05 |
| [ENSCAFG00000011489](http://www.ensembl.org/id/ENSCAFG00000011489) | AMT | 24.56919557 | -1.264350634 | 0.012177856 |
| [ENSCAFG00000010354](http://www.ensembl.org/id/ENSCAFG00000010354) | NT5C2 | 24.53689441 | -1.249465339 | 0.006050722 |
| [ENSCAFG00000009317](http://www.ensembl.org/id/ENSCAFG00000009317) | TMEM45A | 24.46814644 | -1.790471635 | 0.000409093 |
| [ENSCAFG00000013354](http://www.ensembl.org/id/ENSCAFG00000013354) | BDH1 | 24.4219359 | -1.321899605 | 0.015433488 |
| [ENSCAFG00000007271](http://www.ensembl.org/id/ENSCAFG00000007271) | IL36B | 24.29830764 | -10.1884871 | 0 |
| [ENSCAFG00000014833](http://www.ensembl.org/id/ENSCAFG00000014833) | DGCR2 | 24.18557218 | -1.264247286 | 0.009444991 |
| [ENSCAFG00000019606](http://www.ensembl.org/id/ENSCAFG00000019606) | HAGHL | 24.18001215 | -2.553278969 | 1.8669E-05 |
| [ENSCAFG00000005104](http://www.ensembl.org/id/ENSCAFG00000005104) | ITPKC | 24.14862649 | -1.848481557 | 0.000167569 |
| [ENSCAFG00000014877](http://www.ensembl.org/id/ENSCAFG00000014877) | CYP3A12 | 24.08891658 | -3.954661705 | 9.70945E-05 |
| [ENSCAFG00000014332](http://www.ensembl.org/id/ENSCAFG00000014332) | EXPH5 | 24.04954658 | -7.422051039 | 0 |
| [ENSCAFG00000000249](http://www.ensembl.org/id/ENSCAFG00000000249) | PIP4K2C | 24.01806329 | -1.165997706 | 0.017944801 |
| [ENSCAFG00000003694](http://www.ensembl.org/id/ENSCAFG00000003694) | PRDM1 | 24.00573888 | -1.525264655 | 0.007258974 |
| [ENSCAFG00000015413](http://www.ensembl.org/id/ENSCAFG00000015413) | COMTD1 | 23.99096423 | -1.892297958 | 0.002539038 |
| [ENSCAFG00000010644](http://www.ensembl.org/id/ENSCAFG00000010644) | PPP3CA | 23.95191802 | -1.565743688 | 0.000524223 |
| [ENSCAFG00000019495](http://www.ensembl.org/id/ENSCAFG00000019495) | SPSB3 | 23.91847394 | -2.053783883 | 3.4872E-05 |
| [ENSCAFG00000007891](http://www.ensembl.org/id/ENSCAFG00000007891) | HPGD | 23.91472744 | -2.721181736 | 0.000192574 |
| [ENSCAFG00000016285](http://www.ensembl.org/id/ENSCAFG00000016285) | GCOM1 | 23.90909008 | -3.494243004 | 2.28906E-07 |
| [ENSCAFG00000018281](http://www.ensembl.org/id/ENSCAFG00000018281) | ARHGEF37 | 23.90091682 | -4.101988366 | 0 |
| [ENSCAFG00000006942](http://www.ensembl.org/id/ENSCAFG00000006942) | SLC5A8 | 23.81812118 | -6.981959152 | 2.8896E-10 |
| [ENSCAFG00000004816](http://www.ensembl.org/id/ENSCAFG00000004816) | LLGL2 | 23.79308799 | -3.165008817 | 5.28605E-13 |
| [ENSCAFG00000016351](http://www.ensembl.org/id/ENSCAFG00000016351) | ERBB2 | 23.72428424 | -1.412162823 | 0.016014789 |
| [ENSCAFG00000005256](http://www.ensembl.org/id/ENSCAFG00000005256) | NDFIP2 | 23.68349718 | -1.180856745 | 0.014185955 |
| [ENSCAFG00000011913](http://www.ensembl.org/id/ENSCAFG00000011913) | LAMB3 | 23.64248122 | -3.883884921 | 2.46676E-12 |
| [ENSCAFG00000007900](http://www.ensembl.org/id/ENSCAFG00000007900) | ELL2 | 23.56345931 | -2.021108616 | 0.000198664 |
| [ENSCAFG00000009633](http://www.ensembl.org/id/ENSCAFG00000009633) | CBR3 | 23.55170915 | -1.960054452 | 0.00185309 |
| [ENSCAFG00000016442](http://www.ensembl.org/id/ENSCAFG00000016442) | RDH11 | 23.53273309 | -2.112086846 | 3.63428E-06 |
| [ENSCAFG00000013244](http://www.ensembl.org/id/ENSCAFG00000013244) | CDKN1B | 23.49883916 | -1.231132541 | 0.014362774 |
| [ENSCAFG00000007694](http://www.ensembl.org/id/ENSCAFG00000007694) | RNF7 | 23.47538025 | -1.660656762 | 0.000307311 |
| [ENSCAFG00000030514](http://www.ensembl.org/id/ENSCAFG00000030514) | TRAM1L1 | 23.40585325 | -2.830039732 | 1.02348E-07 |
| [ENSCAFG00000013935](http://www.ensembl.org/id/ENSCAFG00000013935) | FAM20B | 23.28889322 | -1.08495209 | 0.048101608 |
| [ENSCAFG00000023435](http://www.ensembl.org/id/ENSCAFG00000023435) | SOWAHC | 23.2646096 | -3.018339391 | 2.82167E-08 |
| [ENSCAFG00000019744](http://www.ensembl.org/id/ENSCAFG00000019744) | CTNNBIP1 | 23.26023312 | -2.354667768 | 0.008661069 |
| [ENSCAFG00000018323](http://www.ensembl.org/id/ENSCAFG00000018323) | ABLIM3 | 23.16577888 | -1.498051495 | 0.006134728 |
| [ENSCAFG00000014599](http://www.ensembl.org/id/ENSCAFG00000014599) | GOLIM4 | 23.12568645 | -1.676944595 | 0.002224685 |
| [ENSCAFG00000000123](http://www.ensembl.org/id/ENSCAFG00000000123) | ATP8B1 | 23.12215263 | -1.629467963 | 0.004223838 |
| [ENSCAFG00000016158](http://www.ensembl.org/id/ENSCAFG00000016158) | BCL2L13 | 23.11570633 | -1.270355354 | 0.0293219 |
| [ENSCAFG00000024926](http://www.ensembl.org/id/ENSCAFG00000024926) | DGAT1 | 23.07079711 | -1.712092892 | 0.000913724 |
| [ENSCAFG00000030417](http://www.ensembl.org/id/ENSCAFG00000030417) | STX3 | 23.01561278 | -1.499197587 | 0.007116256 |
| [ENSCAFG00000008408](http://www.ensembl.org/id/ENSCAFG00000008408) | TPD52 | 22.99230962 | -2.035270204 | 9.14743E-05 |
| [ENSCAFG00000000587](http://www.ensembl.org/id/ENSCAFG00000000587) | GRHL2 | 22.95302906 | -7.090051723 | 0 |
| [ENSCAFG00000014595](http://www.ensembl.org/id/ENSCAFG00000014595) | PYGL | 22.9287774 | -2.598317741 | 5.90411E-10 |
| [ENSCAFG00000016180](http://www.ensembl.org/id/ENSCAFG00000016180) | KLF3 | 22.78274776 | -2.011770237 | 1.53321E-06 |
| [ENSCAFG00000001382](http://www.ensembl.org/id/ENSCAFG00000001382) | MAPK13 | 22.75878707 | -3.08192638 | 2.30543E-13 |
| [ENSCAFG00000031099](http://www.ensembl.org/id/ENSCAFG00000031099) | STUB1 | 22.73397468 | -1.31292665 | 0.003808692 |
| [ENSCAFG00000005061](http://www.ensembl.org/id/ENSCAFG00000005061) | LMO7 | 22.73039817 | -3.511821949 | 9.8392E-09 |
| [ENSCAFG00000008164](http://www.ensembl.org/id/ENSCAFG00000008164) | TMEM154 | 22.71780732 | -2.355105906 | 0.000285439 |
| [ENSCAFG00000012912](http://www.ensembl.org/id/ENSCAFG00000012912) | DHX32 | 22.70745613 | -1.235768865 | 0.009919283 |
| [ENSCAFG00000030997](http://www.ensembl.org/id/ENSCAFG00000030997) | CCDC3 | 22.63870608 | -2.989281398 | 3.72906E-05 |
| [ENSCAFG00000004558](http://www.ensembl.org/id/ENSCAFG00000004558) | NKPD1 | 22.63283821 | -8.452922601 | 0 |
| [ENSCAFG00000001087](http://www.ensembl.org/id/ENSCAFG00000001087) | GSDMC | 22.60636832 | -9.603398397 | 0 |
| [ENSCAFG00000018305](http://www.ensembl.org/id/ENSCAFG00000018305) | LLGL1 | 22.60087923 | -1.601392655 | 0.000124116 |
| [ENSCAFG00000030641](http://www.ensembl.org/id/ENSCAFG00000030641) | LYPLA2 | 22.58560161 | -1.199435786 | 0.037043654 |
| [ENSCAFG00000013059](http://www.ensembl.org/id/ENSCAFG00000013059) | SLC2A4RG | 22.51278172 | -1.213502403 | 0.048118655 |
| [ENSCAFG00000029586](http://www.ensembl.org/id/ENSCAFG00000029586) | GCHFR | 22.38173936 | -2.662380182 | 0.000931331 |
| [ENSCAFG00000005754](http://www.ensembl.org/id/ENSCAFG00000005754) | NR1D2 | 22.34830979 | -1.474997838 | 0.001629068 |
| [ENSCAFG00000001611](http://www.ensembl.org/id/ENSCAFG00000001611) | IRF5 | 22.33062322 | -3.11578226 | 1.76572E-09 |
| [ENSCAFG00000013701](http://www.ensembl.org/id/ENSCAFG00000013701) | DUOXA2 | 22.27003137 | -7.920336383 | 0 |
| [ENSCAFG00000009500](http://www.ensembl.org/id/ENSCAFG00000009500) | AKTIP | 22.22019307 | -1.403374526 | 0.014411704 |
| [ENSCAFG00000014633](http://www.ensembl.org/id/ENSCAFG00000014633) | FRMD6 | 22.1901377 | -1.311396603 | 0.015287195 |
| [ENSCAFG00000006799](http://www.ensembl.org/id/ENSCAFG00000006799) | C11orf74 | 22.1771458 | -2.009482755 | 1.76539E-05 |
| [ENSCAFG00000023636](http://www.ensembl.org/id/ENSCAFG00000023636) | PRSS22 | 22.14742387 | -3.772057043 | 3.85569E-09 |
| [ENSCAFG00000018376](http://www.ensembl.org/id/ENSCAFG00000018376) | CEP170B | 22.08731836 | -2.316079851 | 5.18729E-07 |
| [ENSCAFG00000019418](http://www.ensembl.org/id/ENSCAFG00000019418) | TRAF7 | 22.08605969 | -1.523759971 | 0.000714248 |
| [ENSCAFG00000016708](http://www.ensembl.org/id/ENSCAFG00000016708) | DGKQ | 21.95445478 | -2.376220668 | 3.34451E-07 |
| [ENSCAFG00000011587](http://www.ensembl.org/id/ENSCAFG00000011587) | NGEF | 21.92443576 | -3.074197749 | 0.000156318 |
| [ENSCAFG00000019708](http://www.ensembl.org/id/ENSCAFG00000019708) | CA6 | 21.75969393 | -4.396493502 | 5.92765E-08 |
| [ENSCAFG00000012420](http://www.ensembl.org/id/ENSCAFG00000012420) | MTMR3 | 21.72498198 | -1.727167713 | 0.000210987 |
| [ENSCAFG00000016160](http://www.ensembl.org/id/ENSCAFG00000016160) | EPHX1 | 21.72451517 | -1.476503144 | 0.017207947 |
| [ENSCAFG00000018117](http://www.ensembl.org/id/ENSCAFG00000018117) | CHRDL1 | 21.71475104 | -3.000372117 | 3.1343E-06 |
| [ENSCAFG00000013285](http://www.ensembl.org/id/ENSCAFG00000013285) | OVOL1 | 21.68723153 | -5.812691809 | 8.23869E-13 |
| [ENSCAFG00000002090](http://www.ensembl.org/id/ENSCAFG00000002090) | SRD5A3 | 21.64763487 | -1.249704596 | 0.004367293 |
| [ENSCAFG00000014976](http://www.ensembl.org/id/ENSCAFG00000014976) | MARK2 | 21.63197453 | -1.461335181 | 0.001787035 |
| [ENSCAFG00000009659](http://www.ensembl.org/id/ENSCAFG00000009659) | HR | 21.60514736 | -1.724424876 | 0.020777106 |
| [ENSCAFG00000002013](http://www.ensembl.org/id/ENSCAFG00000002013) | SMARCA2 | 21.52691838 | -1.708626069 | 0.000192159 |
| [ENSCAFG00000000076](http://www.ensembl.org/id/ENSCAFG00000000076) | PYM1 | 21.49992389 | -1.102034011 | 0.038729659 |
| [ENSCAFG00000013955](http://www.ensembl.org/id/ENSCAFG00000013955) | DYNLT3 | 21.41028242 | -1.280276576 | 0.004459895 |
| [ENSCAFG00000031937](http://www.ensembl.org/id/ENSCAFG00000031937) | SLC35C1 | 21.25584578 | -2.248979875 | 5.66755E-08 |
| [ENSCAFG00000005686](http://www.ensembl.org/id/ENSCAFG00000005686) | SLC23A1 | 21.20754115 | -8.789255736 | 0 |
| [ENSCAFG00000004718](http://www.ensembl.org/id/ENSCAFG00000004718) | SLC16A5 | 21.03823434 | -1.985660386 | 2.12401E-05 |
| [ENSCAFG00000009884](http://www.ensembl.org/id/ENSCAFG00000009884) | MMRN1 | 21.00898278 | -4.015372167 | 5.36318E-05 |
| [ENSCAFG00000009075](http://www.ensembl.org/id/ENSCAFG00000009075) | C15orf52 | 20.99116056 | -2.778856064 | 5.03614E-11 |
| [ENSCAFG00000010192](http://www.ensembl.org/id/ENSCAFG00000010192) | RNF144B | 20.93715717 | -1.866548577 | 0.00098527 |
| [ENSCAFG00000015628](http://www.ensembl.org/id/ENSCAFG00000015628) | SGMS1 | 20.93044822 | -1.337855633 | 0.015659325 |
| [ENSCAFG00000010038](http://www.ensembl.org/id/ENSCAFG00000010038) | NUAK2 | 20.87615921 | -4.534815198 | 0 |
| [ENSCAFG00000009759](http://www.ensembl.org/id/ENSCAFG00000009759) | SNX21 | 20.82873331 | -1.897066759 | 0.000355996 |
| [ENSCAFG00000005932](http://www.ensembl.org/id/ENSCAFG00000005932) | VPS36 | 20.66131459 | -1.898018796 | 9.52635E-06 |
| [ENSCAFG00000030205](http://www.ensembl.org/id/ENSCAFG00000030205) | KCTD1 | 20.65663635 | -2.108855735 | 4.98428E-06 |
| [ENSCAFG00000008477](http://www.ensembl.org/id/ENSCAFG00000008477) | BLNK | 20.63271394 | -3.861302998 | 4.76952E-14 |
| [ENSCAFG00000014774](http://www.ensembl.org/id/ENSCAFG00000014774) | GPR160 | 20.60662025 | -3.258353513 | 5.97495E-08 |
| [ENSCAFG00000023507](http://www.ensembl.org/id/ENSCAFG00000023507) | CNPPD1 | 20.50811791 | -1.172470233 | 0.012516747 |
| [ENSCAFG00000029494](http://www.ensembl.org/id/ENSCAFG00000029494) | CEND1 | 20.49873755 | -2.27250783 | 0.001234904 |
| [ENSCAFG00000013210](http://www.ensembl.org/id/ENSCAFG00000013210) | PITHD1 | 20.46490736 | -1.831351138 | 5.74552E-05 |
| [ENSCAFG00000014530](http://www.ensembl.org/id/ENSCAFG00000014530) | ABLIM2 | 20.44152171 | -5.263973723 | 1.03033E-08 |
| [ENSCAFG00000001377](http://www.ensembl.org/id/ENSCAFG00000001377) | GTPBP1 | 20.35800233 | -1.819308118 | 1.27296E-05 |
| [ENSCAFG00000005678](http://www.ensembl.org/id/ENSCAFG00000005678) | LGALS7 | 20.28509422 | -3.845984241 | 0.000959222 |
| [ENSCAFG00000008215](http://www.ensembl.org/id/ENSCAFG00000008215) | USP25 | 20.28074224 | -2.525724231 | 2.55877E-09 |
| [ENSCAFG00000016479](http://www.ensembl.org/id/ENSCAFG00000016479) | TMEM184A | 20.28052305 | -6.865285987 | 0 |
| [ENSCAFG00000018266](http://www.ensembl.org/id/ENSCAFG00000018266) | SLC6A14 | 19.98740325 | -6.665869238 | 1.16126E-09 |
| [ENSCAFG00000006947](http://www.ensembl.org/id/ENSCAFG00000006947) | ATP6V1H | 19.87686896 | -1.205491198 | 0.010977427 |
| [ENSCAFG00000011768](http://www.ensembl.org/id/ENSCAFG00000011768) | STK39 | 19.85242002 | -1.610224471 | 0.000762149 |
| [ENSCAFG00000016044](http://www.ensembl.org/id/ENSCAFG00000016044) | TNS4 | 19.77947615 | -5.677811584 | 1.7431E-13 |
| [ENSCAFG00000000058](http://www.ensembl.org/id/ENSCAFG00000000058) | SERPINB8 | 19.76083744 | -2.920351682 | 3.57248E-07 |
| [ENSCAFG00000009414](http://www.ensembl.org/id/ENSCAFG00000009414) | CHAC1 | 19.69521479 | -2.157035955 | 0.02148247 |
| [ENSCAFG00000004912](http://www.ensembl.org/id/ENSCAFG00000004912) | PRKAG2 | 19.65909176 | -2.156477092 | 1.49365E-05 |
| [ENSCAFG00000029682](http://www.ensembl.org/id/ENSCAFG00000029682) | INAVA | 19.63428143 | -3.203075275 | 1.11612E-12 |
| [ENSCAFG00000012525](http://www.ensembl.org/id/ENSCAFG00000012525) | MUC13 | 19.58598328 | -7.564317637 | 0 |
| [ENSCAFG00000000721](http://www.ensembl.org/id/ENSCAFG00000000721) | ISOC1 | 19.55725789 | -1.537486152 | 0.006225734 |
| [ENSCAFG00000007204](http://www.ensembl.org/id/ENSCAFG00000007204) | KRT79 | 19.48897379 | -6.875070035 | 9.91765E-10 |
| [ENSCAFG00000006181](http://www.ensembl.org/id/ENSCAFG00000006181) | ATL2 | 19.41944993 | -1.36192759 | 0.00375196 |
| [ENSCAFG00000020403](http://www.ensembl.org/id/ENSCAFG00000020403) | NAE1 | 19.41405712 | -1.080304032 | 0.041428068 |
| [ENSCAFG00000016787](http://www.ensembl.org/id/ENSCAFG00000016787) | STX4 | 19.33995263 | -1.252905476 | 0.015826549 |
| [ENSCAFG00000005730](http://www.ensembl.org/id/ENSCAFG00000005730) | DOCK9 | 19.32924964 | -2.02585762 | 0.000762331 |
| [ENSCAFG00000015246](http://www.ensembl.org/id/ENSCAFG00000015246) | PLD1 | 19.32816132 | -1.808356187 | 0.000895395 |
| [ENSCAFG00000030441](http://www.ensembl.org/id/ENSCAFG00000030441) | MGAT3 | 19.29653678 | -2.767652734 | 8.28633E-08 |
| [ENSCAFG00000014161](http://www.ensembl.org/id/ENSCAFG00000014161) | CDC42BPG | 19.29081546 | -4.858554731 | 0 |
| [ENSCAFG00000007695](http://www.ensembl.org/id/ENSCAFG00000007695) | SLMAP | 19.15323627 | -1.323831028 | 0.005159928 |
| [ENSCAFG00000000751](http://www.ensembl.org/id/ENSCAFG00000000751) | TNXB | 19.14669045 | -4.103291065 | 1.90333E-07 |
| [ENSCAFG00000001902](http://www.ensembl.org/id/ENSCAFG00000001902) | TJP2 | 19.13444327 | -1.382038263 | 0.006122079 |
| [ENSCAFG00000020417](http://www.ensembl.org/id/ENSCAFG00000020417) | CTH | 19.08446954 | -3.241106294 | 7.46692E-11 |
| [ENSCAFG00000028688](http://www.ensembl.org/id/ENSCAFG00000028688) | SRXN1 | 19.01889502 | -1.631842587 | 0.021924291 |
| [ENSCAFG00000004467](http://www.ensembl.org/id/ENSCAFG00000004467) | XPC | 18.83445607 | -1.569013103 | 0.000110555 |
| [ENSCAFG00000009993](http://www.ensembl.org/id/ENSCAFG00000009993) | ST14 | 18.81560139 | -5.234973033 | 0 |
| [ENSCAFG00000016428](http://www.ensembl.org/id/ENSCAFG00000016428) | ARG2 | 18.80785829 | -1.50826602 | 0.003334313 |
| [ENSCAFG00000009494](http://www.ensembl.org/id/ENSCAFG00000009494) | DENND2C | 18.76127297 | -3.314279069 | 1.80263E-11 |
| [ENSCAFG00000009461](http://www.ensembl.org/id/ENSCAFG00000009461) | PHYHIP | 18.7026135 | -3.024241323 | 0.000353933 |
| [ENSCAFG00000011941](http://www.ensembl.org/id/ENSCAFG00000011941) | TARS2 | 18.68971404 | -1.222070083 | 0.005952862 |
| [ENSCAFG00000003928](http://www.ensembl.org/id/ENSCAFG00000003928) | DBP | 18.62171642 | -2.042346072 | 2.91995E-05 |
| [ENSCAFG00000029313](http://www.ensembl.org/id/ENSCAFG00000029313) | CLDN1 | 18.53208298 | -2.031519396 | 0.000600634 |
| [ENSCAFG00000031586](http://www.ensembl.org/id/ENSCAFG00000031586) | LGALSL | 18.42242158 | -2.66550101 | 4.4159E-08 |
| [ENSCAFG00000000282](http://www.ensembl.org/id/ENSCAFG00000000282) | HECA | 18.32090175 | -1.408709685 | 0.013099896 |
| [ENSCAFG00000012374](http://www.ensembl.org/id/ENSCAFG00000012374) | FGFR2 | 18.28847084 | -3.209596236 | 1.1772E-08 |
| [ENSCAFG00000002658](http://www.ensembl.org/id/ENSCAFG00000002658) | SLC17A5 | 18.24348601 | -1.712872156 | 0.000136482 |
| [ENSCAFG00000001332](http://www.ensembl.org/id/ENSCAFG00000001332) | TAB1 | 18.22134833 | -1.33977497 | 0.002371365 |
| [ENSCAFG00000003888](http://www.ensembl.org/id/ENSCAFG00000003888) | TTC39A | 18.19773062 | -1.572351347 | 0.001453951 |
| [ENSCAFG00000013279](http://www.ensembl.org/id/ENSCAFG00000013279) | OTUB1_1 | 18.0995507 | -1.699164861 | 0.000374892 |
| [ENSCAFG00000018083](http://www.ensembl.org/id/ENSCAFG00000018083) | TMEM164 | 18.02571401 | -2.011486421 | 1.86631E-06 |
| [ENSCAFG00000004672](http://www.ensembl.org/id/ENSCAFG00000004672) | HECTD3 | 17.98741193 | -1.308036074 | 0.00953792 |
| [ENSCAFG00000003198](http://www.ensembl.org/id/ENSCAFG00000003198) | FKBP15 | 17.96687709 | -1.208558501 | 0.01134781 |
| [ENSCAFG00000017716](http://www.ensembl.org/id/ENSCAFG00000017716) | EEF2K | 17.95725197 | -1.265546276 | 0.047712672 |
| [ENSCAFG00000001092](http://www.ensembl.org/id/ENSCAFG00000001092) | TOB2 | 17.92600116 | -1.422351313 | 0.014271621 |
| [ENSCAFG00000014823](http://www.ensembl.org/id/ENSCAFG00000014823) | PRKCI | 17.9062164 | -2.133999176 | 2.72836E-07 |
| [ENSCAFG00000005884](http://www.ensembl.org/id/ENSCAFG00000005884) | PGAP2 | 17.85288714 | -2.305533686 | 2.79571E-06 |
| [ENSCAFG00000002180](http://www.ensembl.org/id/ENSCAFG00000002180) | SEMA4D | 17.84104961 | -1.674650365 | 0.000149338 |
| [ENSCAFG00000009939](http://www.ensembl.org/id/ENSCAFG00000009939) | SUDS3 | 17.67434227 | -1.175167559 | 0.016142685 |
| [ENSCAFG00000010706](http://www.ensembl.org/id/ENSCAFG00000010706) | MXI1 | 17.66660077 | -1.333993604 | 0.003358762 |
| [ENSCAFG00000001288](http://www.ensembl.org/id/ENSCAFG00000001288) | FAM83F | 17.64987761 | -8.156806194 | 0 |
| [ENSCAFG00000003737](http://www.ensembl.org/id/ENSCAFG00000003737) | PARD3 | 17.61289491 | -1.521089877 | 0.000434422 |
| [ENSCAFG00000011535](http://www.ensembl.org/id/ENSCAFG00000011535) | TMEM134 | 17.58084746 | -2.397653467 | 7.27865E-08 |
| [ENSCAFG00000019512](http://www.ensembl.org/id/ENSCAFG00000019512) | ADAMTSL5 | 17.56115556 | -3.918252679 | 1.87875E-13 |
| [ENSCAFG00000025153](http://www.ensembl.org/id/ENSCAFG00000025153) | TTC9 | 17.53415196 | -4.05795336 | 3.40067E-11 |
| [ENSCAFG00000012685](http://www.ensembl.org/id/ENSCAFG00000012685) | PLXNB1 | 17.46208782 | -1.587956946 | 0.004958534 |
| [ENSCAFG00000011801](http://www.ensembl.org/id/ENSCAFG00000011801) | PHACTR4 | 17.449514 | -1.344308156 | 0.006408151 |
| [ENSCAFG00000001456](http://www.ensembl.org/id/ENSCAFG00000001456) | GCAT | 17.29694058 | -3.367712756 | 1.2254E-09 |
| [ENSCAFG00000016916](http://www.ensembl.org/id/ENSCAFG00000016916) | B4GALNT2 | 17.25803684 | -12.44309501 | 8.57266E-14 |
| [ENSCAFG00000019975](http://www.ensembl.org/id/ENSCAFG00000019975) | USP20 | 17.23686482 | -2.196329041 | 2.02521E-07 |
| [ENSCAFG00000016280](http://www.ensembl.org/id/ENSCAFG00000016280) | TNK1 | 17.1922582 | -6.714137634 | 0 |
| [ENSCAFG00000019185](http://www.ensembl.org/id/ENSCAFG00000019185) | TREX2 | 17.18570172 | -2.931414949 | 2.33849E-06 |
| [ENSCAFG00000006163](http://www.ensembl.org/id/ENSCAFG00000006163) | EEA1 | 17.17088979 | -1.584599834 | 0.000950197 |
| [ENSCAFG00000006334](http://www.ensembl.org/id/ENSCAFG00000006334) | GRTP1 | 17.16713588 | -6.089605064 | 0 |
| [ENSCAFG00000010716](http://www.ensembl.org/id/ENSCAFG00000010716) | TPCN2 | 17.11182538 | -1.666917757 | 0.000421898 |
| [ENSCAFG00000011996](http://www.ensembl.org/id/ENSCAFG00000011996) | TFAP2C | 17.11083318 | -2.298350742 | 0.01655876 |
| [ENSCAFG00000001280](http://www.ensembl.org/id/ENSCAFG00000001280) | SLURP1 | 17.10113263 | -8.028626132 | 7.02652E-13 |
| [ENSCAFG00000018201](http://www.ensembl.org/id/ENSCAFG00000018201) | RIOK3 | 17.05779125 | -1.45590105 | 0.000648224 |
| [ENSCAFG00000009758](http://www.ensembl.org/id/ENSCAFG00000009758) | VANGL1 | 17.03169306 | -1.254317565 | 0.022301817 |
| [ENSCAFG00000001516](http://www.ensembl.org/id/ENSCAFG00000001516) | TST | 17.00981804 | -3.070108779 | 3.4281E-05 |
| [ENSCAFG00000017766](http://www.ensembl.org/id/ENSCAFG00000017766) | TPGS2 | 16.92796225 | -1.325457157 | 0.005371823 |
| [ENSCAFG00000011267](http://www.ensembl.org/id/ENSCAFG00000011267) | AJUBA | 16.88244949 | -1.345026567 | 0.002608869 |
| [ENSCAFG00000007450](http://www.ensembl.org/id/ENSCAFG00000007450) | RMND5A | 16.87579013 | -1.242505082 | 0.014642535 |
| [ENSCAFG00000007760](http://www.ensembl.org/id/ENSCAFG00000007760) | CCDC125 | 16.82974459 | -1.82601627 | 0.00078185 |
| [ENSCAFG00000013856](http://www.ensembl.org/id/ENSCAFG00000013856) | ACADL | 16.81039884 | -2.872361625 | 3.0324E-07 |
| [ENSCAFG00000007789](http://www.ensembl.org/id/ENSCAFG00000007789) | ARHGAP10 | 16.79721555 | -1.335836117 | 0.001422124 |
| [ENSCAFG00000002089](http://www.ensembl.org/id/ENSCAFG00000002089) | CD2AP | 16.76561473 | -1.10072736 | 0.022539408 |
| [ENSCAFG00000008866](http://www.ensembl.org/id/ENSCAFG00000008866) | PACSIN3 | 16.76117986 | -1.466443078 | 0.01416952 |
| [ENSCAFG00000012239](http://www.ensembl.org/id/ENSCAFG00000012239) | HDDC3 | 16.65414507 | -1.410069927 | 0.002679274 |
| [ENSCAFG00000014455](http://www.ensembl.org/id/ENSCAFG00000014455) | ESRRA | 16.63812456 | -1.583928848 | 0.000524247 |
| [ENSCAFG00000007764](http://www.ensembl.org/id/ENSCAFG00000007764) | HIP1R | 16.58222307 | -1.322103167 | 0.003880692 |
| [ENSCAFG00000019477](http://www.ensembl.org/id/ENSCAFG00000019477) | MEGF6 | 16.47860138 | -1.921013399 | 0.01751159 |
| [ENSCAFG00000003189](http://www.ensembl.org/id/ENSCAFG00000003189) | RHBDL2 | 16.41986613 | -3.078942652 | 4.29355E-06 |
| [ENSCAFG00000012430](http://www.ensembl.org/id/ENSCAFG00000012430) | BCL9L | 16.39070435 | -1.135169789 | 0.024200181 |
| [ENSCAFG00000017219](http://www.ensembl.org/id/ENSCAFG00000017219) | SH2B1 | 16.38921804 | -1.361169299 | 0.008486833 |
| [ENSCAFG00000020184](http://www.ensembl.org/id/ENSCAFG00000020184) | CHST4 | 16.38817655 | -6.030041784 | 0 |
| [ENSCAFG00000006917](http://www.ensembl.org/id/ENSCAFG00000006917) | MAP3K1 | 16.30046882 | -1.875247469 | 0.000945405 |
| [ENSCAFG00000012081](http://www.ensembl.org/id/ENSCAFG00000012081) | PC | 16.27295152 | -2.252298026 | 2.58896E-07 |
| [ENSCAFG00000013931](http://www.ensembl.org/id/ENSCAFG00000013931) | TPRG1 | 16.24330446 | -9.144849835 | 0 |
| [ENSCAFG00000006931](http://www.ensembl.org/id/ENSCAFG00000006931) | AACS | 16.24250587 | -1.577286898 | 0.002065384 |
| [ENSCAFG00000005122](http://www.ensembl.org/id/ENSCAFG00000005122) | ST6GALNAC2 | 16.20075659 | -2.544881928 | 3.87716E-07 |
| [ENSCAFG00000019793](http://www.ensembl.org/id/ENSCAFG00000019793) | STRIP1 | 16.16930965 | -1.035127156 | 0.023244409 |
| [ENSCAFG00000015802](http://www.ensembl.org/id/ENSCAFG00000015802) | ENO3 | 16.13042776 | -1.91319894 | 0.009314361 |
| [ENSCAFG00000013320](http://www.ensembl.org/id/ENSCAFG00000013320) | APOA1 | 16.12394945 | -2.401643506 | 0.026518539 |
| [ENSCAFG00000005235](http://www.ensembl.org/id/ENSCAFG00000005235) | CALML5 | 16.07081669 | -8.986089739 | 6.82714E-13 |
| [ENSCAFG00000030792](http://www.ensembl.org/id/ENSCAFG00000030792) | CA13 | 16.06240131 | -4.572811377 | 0 |
| [ENSCAFG00000024335](http://www.ensembl.org/id/ENSCAFG00000024335) | ZBTB7A | 16.06178743 | -1.031743843 | 0.049965003 |
| [ENSCAFG00000005215](http://www.ensembl.org/id/ENSCAFG00000005215) | IL17RC | 16.03757012 | -1.319311575 | 0.012396586 |
| [ENSCAFG00000023053](http://www.ensembl.org/id/ENSCAFG00000023053) | CYP4F22 | 16.00054878 | -8.448566843 | 0 |
| [ENSCAFG00000014336](http://www.ensembl.org/id/ENSCAFG00000014336) | LRCH4 | 15.99617186 | -1.271667258 | 0.009235347 |
| [ENSCAFG00000020348](http://www.ensembl.org/id/ENSCAFG00000020348) | GFOD2 | 15.99064546 | -1.585900815 | 0.001895044 |
| [ENSCAFG00000010347](http://www.ensembl.org/id/ENSCAFG00000010347) | FAN1 | 15.97642421 | -1.273053141 | 0.00286995 |
| [ENSCAFG00000016298](http://www.ensembl.org/id/ENSCAFG00000016298) | TMEM102 | 15.91612644 | -2.953066328 | 1.57263E-08 |
| [ENSCAFG00000012452](http://www.ensembl.org/id/ENSCAFG00000012452) | CCDC6 | 15.881529 | -1.379771258 | 0.013109835 |
| [ENSCAFG00000003702](http://www.ensembl.org/id/ENSCAFG00000003702) | MGST2 | 15.84146349 | -4.914031666 | 3.19699E-10 |
| [ENSCAFG00000004473](http://www.ensembl.org/id/ENSCAFG00000004473) | ESD | 15.82435647 | -1.03381948 | 0.032750353 |
| [ENSCAFG00000004874](http://www.ensembl.org/id/ENSCAFG00000004874) | KRTCAP3 | 15.80245518 | -3.776155519 | 1.19231E-08 |
| [ENSCAFG00000000367](http://www.ensembl.org/id/ENSCAFG00000000367) | ENPP3 | 15.73591122 | -6.955233073 | 0 |
| [ENSCAFG00000001771](http://www.ensembl.org/id/ENSCAFG00000001771) | WASL | 15.73320522 | -1.155543773 | 0.014250639 |
| [ENSCAFG00000008852](http://www.ensembl.org/id/ENSCAFG00000008852) | DDB2 | 15.58503264 | -2.854741445 | 1.82354E-05 |
| [ENSCAFG00000007578](http://www.ensembl.org/id/ENSCAFG00000007578) | TP53INP2 | 15.57842714 | -3.61848136 | 4.24532E-09 |
| [ENSCAFG00000002313](http://www.ensembl.org/id/ENSCAFG00000002313) | OGN | 15.5353343 | -2.012464174 | 0.019183889 |
| [ENSCAFG00000007361](http://www.ensembl.org/id/ENSCAFG00000007361) | EPB41L4A | 15.48344836 | -2.85392246 | 6.1338E-08 |
| [ENSCAFG00000011800](http://www.ensembl.org/id/ENSCAFG00000011800) | VSIG8 | 15.4742638 | -8.595329762 | 0 |
| [ENSCAFG00000005630](http://www.ensembl.org/id/ENSCAFG00000005630) | P2RY2 | 15.43946496 | -3.222010722 | 1.98998E-08 |
| [ENSCAFG00000002028](http://www.ensembl.org/id/ENSCAFG00000002028) | VLDLR | 15.42252701 | -1.763614751 | 0.00080028 |
| [ENSCAFG00000006695](http://www.ensembl.org/id/ENSCAFG00000006695) | SLCO2A1 | 15.42171506 | -2.375278908 | 0.003165689 |
| [ENSCAFG00000000614](http://www.ensembl.org/id/ENSCAFG00000000614) | LY6G6C | 15.41809447 | -8.704127377 | 6.29576E-13 |
| [ENSCAFG00000003981](http://www.ensembl.org/id/ENSCAFG00000003981) | SULT2B1 | 15.38530237 | -11.06719657 | 0 |
| [ENSCAFG00000019647](http://www.ensembl.org/id/ENSCAFG00000019647) | RHOT2 | 15.33862894 | -1.065280935 | 0.031675374 |
| [ENSCAFG00000007681](http://www.ensembl.org/id/ENSCAFG00000007681) | MFAP3L | 15.30232734 | -3.826658917 | 1.9151E-08 |
| [ENSCAFG00000013792](http://www.ensembl.org/id/ENSCAFG00000013792) | STARD5 | 15.29023756 | -1.571217263 | 0.019278007 |
| [ENSCAFG00000003165](http://www.ensembl.org/id/ENSCAFG00000003165) | BPGM | 15.27125818 | -1.616367165 | 0.015334833 |
| [ENSCAFG00000031150](http://www.ensembl.org/id/ENSCAFG00000031150) | PAIP2 | 15.2491091 | -1.195971418 | 0.018480532 |
| [ENSCAFG00000019525](http://www.ensembl.org/id/ENSCAFG00000019525) | NPDC1 | 15.24138447 | -2.070608796 | 0.000860193 |
| [ENSCAFG00000012144](http://www.ensembl.org/id/ENSCAFG00000012144) | MAP3K6 | 15.22844754 | -2.658520717 | 2.98836E-10 |
| [ENSCAFG00000002288](http://www.ensembl.org/id/ENSCAFG00000002288) | GCLC | 15.16938328 | -1.320932455 | 0.003065779 |
| [ENSCAFG00000002557](http://www.ensembl.org/id/ENSCAFG00000002557) | RIMKLA | 15.16321901 | -3.824071874 | 3.78186E-10 |
| [ENSCAFG00000019133](http://www.ensembl.org/id/ENSCAFG00000019133) | MTMR1 | 15.15164417 | -1.479551902 | 0.000477768 |
| [ENSCAFG00000009361](http://www.ensembl.org/id/ENSCAFG00000009361) | PKP4 | 15.14949397 | -1.356946835 | 0.007676286 |
| [ENSCAFG00000002305](http://www.ensembl.org/id/ENSCAFG00000002305) | LRRC1 | 15.14667665 | -2.302053537 | 3.58515E-07 |
| [ENSCAFG00000008803](http://www.ensembl.org/id/ENSCAFG00000008803) | CLDN17 | 15.12615566 | -11.08604147 | 1.56008E-10 |
| [ENSCAFG00000031870](http://www.ensembl.org/id/ENSCAFG00000031870) | RNF125 | 15.10237576 | -2.408042604 | 8.11195E-08 |
| [ENSCAFG00000000206](http://www.ensembl.org/id/ENSCAFG00000000206) | CDO1 | 15.09988791 | -1.826249878 | 0.013380764 |
| [ENSCAFG00000008638](http://www.ensembl.org/id/ENSCAFG00000008638) | ARHGEF26 | 15.05869037 | -1.614178156 | 0.007559678 |
| [ENSCAFG00000009116](http://www.ensembl.org/id/ENSCAFG00000009116) | IVD | 15.00321821 | -1.125619403 | 0.041752457 |
| [ENSCAFG00000009306](http://www.ensembl.org/id/ENSCAFG00000009306) | F2RL2 | 14.97702835 | -4.765911829 | 1.18408E-10 |
| [ENSCAFG00000009025](http://www.ensembl.org/id/ENSCAFG00000009025) | STX19 | 14.97051426 | -6.041973484 | 8.66135E-15 |
| [ENSCAFG00000008969](http://www.ensembl.org/id/ENSCAFG00000008969) | KCTD9 | 14.8448056 | -1.059062477 | 0.049214206 |
| [ENSCAFG00000010188](http://www.ensembl.org/id/ENSCAFG00000010188) | LGR4 | 14.82310836 | -1.337054512 | 0.021880075 |
| [ENSCAFG00000006175](http://www.ensembl.org/id/ENSCAFG00000006175) | CDC25B | 14.79627207 | -1.189909394 | 0.027669594 |
| [ENSCAFG00000012965](http://www.ensembl.org/id/ENSCAFG00000012965) | PACS1 | 14.79598018 | -1.392289709 | 0.003316453 |
| [ENSCAFG00000016328](http://www.ensembl.org/id/ENSCAFG00000016328) | GRB7 | 14.78124309 | -7.210497176 | 0 |
| [ENSCAFG00000030764](http://www.ensembl.org/id/ENSCAFG00000030764) | SLC25A29 | 14.69503318 | -1.564939677 | 0.008934707 |
| [ENSCAFG00000030565](http://www.ensembl.org/id/ENSCAFG00000030565) | DUSP5 | 14.66679943 | -1.552017992 | 0.009105829 |
| [ENSCAFG00000007205](http://www.ensembl.org/id/ENSCAFG00000007205) | C3orf67 | 14.64687419 | -1.17629731 | 0.038236343 |
| [ENSCAFG00000028837](http://www.ensembl.org/id/ENSCAFG00000028837) | UQCR10 | 14.63991681 | -1.374399408 | 0.009434946 |
| [ENSCAFG00000018008](http://www.ensembl.org/id/ENSCAFG00000018008) | GAREM1 | 14.61684672 | -2.558013931 | 3.20439E-07 |
| [ENSCAFG00000019352](http://www.ensembl.org/id/ENSCAFG00000019352) | PERM1 | 14.56814103 | -4.328570776 | 0 |
| [ENSCAFG00000011659](http://www.ensembl.org/id/ENSCAFG00000011659) | ATP9A | 14.554222 | -1.612825021 | 0.000564865 |
| [ENSCAFG00000016154](http://www.ensembl.org/id/ENSCAFG00000016154) | TMEM63A | 14.52202667 | -1.407802072 | 0.006523157 |
| [ENSCAFG00000020251](http://www.ensembl.org/id/ENSCAFG00000020251) | NOB1 | 14.46528797 | -1.013640611 | 0.046307776 |
| [ENSCAFG00000012409](http://www.ensembl.org/id/ENSCAFG00000012409) | KHNYN | 14.44845757 | -1.328074767 | 0.008846067 |
| [ENSCAFG00000004742](http://www.ensembl.org/id/ENSCAFG00000004742) | PINLYP | 14.43747612 | -8.900605552 | 0 |
| [ENSCAFG00000005663](http://www.ensembl.org/id/ENSCAFG00000005663) | STARD10 | 14.43476338 | -1.917736134 | 0.000833693 |
| [ENSCAFG00000002848](http://www.ensembl.org/id/ENSCAFG00000002848) | BCKDHB | 14.42397675 | -2.196668811 | 5.77106E-06 |
| [ENSCAFG00000011677](http://www.ensembl.org/id/ENSCAFG00000011677) | EPB41 | 14.35731995 | -1.42271886 | 0.003880692 |
| [ENSCAFG00000012489](http://www.ensembl.org/id/ENSCAFG00000012489) | CASTOR1 | 14.30447938 | -3.21286863 | 1.81504E-13 |
| [ENSCAFG00000016570](http://www.ensembl.org/id/ENSCAFG00000016570) | LAS1L | 14.30108229 | -1.241548162 | 0.003410525 |
| [ENSCAFG00000007325](http://www.ensembl.org/id/ENSCAFG00000007325) | PRRG4 | 14.27533029 | -2.90388769 | 0.002753102 |
| [ENSCAFG00000003759](http://www.ensembl.org/id/ENSCAFG00000003759) | ZFYVE9 | 14.26859239 | -1.083938915 | 0.02728499 |
| [ENSCAFG00000005810](http://www.ensembl.org/id/ENSCAFG00000005810) | KAT2B | 14.25562323 | -1.5777484 | 0.002541544 |
| [ENSCAFG00000011345](http://www.ensembl.org/id/ENSCAFG00000011345) | ITPR2 | 14.17321551 | -2.315481046 | 5.52484E-07 |
| [ENSCAFG00000004237](http://www.ensembl.org/id/ENSCAFG00000004237) | KIAA1217 | 14.17258093 | -1.662242996 | 0.010922256 |
| [ENSCAFG00000019381](http://www.ensembl.org/id/ENSCAFG00000019381) | PRKCZ | 14.14407888 | -2.272876884 | 0.005141474 |
| [ENSCAFG00000015727](http://www.ensembl.org/id/ENSCAFG00000015727) | ARHGEF10L | 14.12399952 | -1.15674686 | 0.010490436 |
| [ENSCAFG00000020315](http://www.ensembl.org/id/ENSCAFG00000020315) | UOX | 14.12314725 | -9.99558118 | 0 |
| [ENSCAFG00000032084](http://www.ensembl.org/id/ENSCAFG00000032084) | SMIM19 | 14.11919941 | -1.208625684 | 0.015861297 |
| [ENSCAFG00000017048](http://www.ensembl.org/id/ENSCAFG00000017048) | FLVCR2 | 14.0674527 | -2.599158633 | 7.8828E-05 |
| [ENSCAFG00000000311](http://www.ensembl.org/id/ENSCAFG00000000311) | LRIG3 | 14.05770061 | -2.182856131 | 0.001232663 |
| [ENSCAFG00000018042](http://www.ensembl.org/id/ENSCAFG00000018042) | SNX33 | 14.04778073 | -1.450645944 | 0.000967448 |
| [ENSCAFG00000005786](http://www.ensembl.org/id/ENSCAFG00000005786) | EIF4EBP3 | 14.04677437 | -1.26303131 | 0.025665484 |
| [ENSCAFG00000002653](http://www.ensembl.org/id/ENSCAFG00000002653) | EPCAM | 14.02221204 | -5.9102022 | 0 |
| [ENSCAFG00000014835](http://www.ensembl.org/id/ENSCAFG00000014835) | USP54 | 14.01813646 | -2.764364521 | 6.87574E-06 |
| [ENSCAFG00000010665](http://www.ensembl.org/id/ENSCAFG00000010665) | SLC16A14 | 13.98914226 | -5.833867393 | 0 |
| [ENSCAFG00000005606](http://www.ensembl.org/id/ENSCAFG00000005606) | PAK4 | 13.83353821 | -1.294161117 | 0.003068694 |
| [ENSCAFG00000014712](http://www.ensembl.org/id/ENSCAFG00000014712) | MACROD1 | 13.77924653 | -2.372305865 | 1.03822E-05 |
| [ENSCAFG00000002293](http://www.ensembl.org/id/ENSCAFG00000002293) | IPPK | 13.72990876 | -1.665346439 | 0.001082439 |
| [ENSCAFG00000012511](http://www.ensembl.org/id/ENSCAFG00000012511) | CRYBG2 | 13.71330124 | -9.316434578 | 0 |
| [ENSCAFG00000009667](http://www.ensembl.org/id/ENSCAFG00000009667) | NUDT18 | 13.70370312 | -1.523431205 | 0.006022072 |
| [ENSCAFG00000009326](http://www.ensembl.org/id/ENSCAFG00000009326) | BPHL | 13.66241921 | -1.710824369 | 0.008051122 |
| [ENSCAFG00000032281](http://www.ensembl.org/id/ENSCAFG00000032281) | XKR8 | 13.65300522 | -1.588172346 | 0.000910886 |
| [ENSCAFG00000010664](http://www.ensembl.org/id/ENSCAFG00000010664) | ANO1 | 13.63653419 | -3.08766416 | 9.02309E-09 |
| [ENSCAFG00000004377](http://www.ensembl.org/id/ENSCAFG00000004377) | ACBD5 | 13.59519556 | -1.059077022 | 0.03058449 |
| [ENSCAFG00000004542](http://www.ensembl.org/id/ENSCAFG00000004542) | CYP27C1 | 13.58042052 | -2.37025607 | 2.66887E-06 |
| [ENSCAFG00000015126](http://www.ensembl.org/id/ENSCAFG00000015126) | SCYL3 | 13.57676885 | -1.466119894 | 0.001439425 |
| [ENSCAFG00000015468](http://www.ensembl.org/id/ENSCAFG00000015468) | TAS1R2 | 13.5316916 | -1.432089547 | 0.006082018 |
| [ENSCAFG00000006176](http://www.ensembl.org/id/ENSCAFG00000006176) | RAB11FIP1 | 13.4839244 | -2.276525628 | 1.24374E-07 |
| [ENSCAFG00000009448](http://www.ensembl.org/id/ENSCAFG00000009448) | SLC10A6 | 13.47557814 | -3.645769681 | 4.44155E-05 |
| [ENSCAFG00000012854](http://www.ensembl.org/id/ENSCAFG00000012854) | RERG | 13.46529789 | -4.210980897 | 0 |
| [ENSCAFG00000003746](http://www.ensembl.org/id/ENSCAFG00000003746) | TRPM4 | 13.42138002 | -2.999511968 | 8.48694E-13 |
| [ENSCAFG00000008784](http://www.ensembl.org/id/ENSCAFG00000008784) | WWP1 | 13.4104384 | -1.12969785 | 0.017899208 |
| [ENSCAFG00000010691](http://www.ensembl.org/id/ENSCAFG00000010691) | CERS3 | 13.37680942 | -6.390784606 | 0 |
| [ENSCAFG00000031783](http://www.ensembl.org/id/ENSCAFG00000031783) | CASP6 | 13.27726993 | -1.309179612 | 0.002897805 |
| [ENSCAFG00000009561](http://www.ensembl.org/id/ENSCAFG00000009561) | DNMBP | 13.27654921 | -1.787831839 | 0.000142539 |
| [ENSCAFG00000018401](http://www.ensembl.org/id/ENSCAFG00000018401) | JAG2 | 13.25939559 | -2.39955872 | 6.77959E-07 |
| [ENSCAFG00000012191](http://www.ensembl.org/id/ENSCAFG00000012191) | RABGGTA | 13.24427781 | -1.264739693 | 0.012774145 |
| [ENSCAFG00000031922](http://www.ensembl.org/id/ENSCAFG00000031922) | GPX3 | 13.23075992 | -2.061557385 | 0.015713302 |
| [ENSCAFG00000017183](http://www.ensembl.org/id/ENSCAFG00000017183) | HOOK2 | 13.20643677 | -2.613931724 | 6.20654E-08 |
| [ENSCAFG00000006091](http://www.ensembl.org/id/ENSCAFG00000006091) | KITLG | 13.20164836 | -1.396609651 | 0.016855373 |
| [ENSCAFG00000015351](http://www.ensembl.org/id/ENSCAFG00000015351) | BAIAP2L1 | 13.19480748 | -4.652294099 | 1.67156E-14 |
| [ENSCAFG00000002599](http://www.ensembl.org/id/ENSCAFG00000002599) | FAM135A | 13.15636872 | -1.770874984 | 3.95779E-05 |
| [ENSCAFG00000005887](http://www.ensembl.org/id/ENSCAFG00000005887) | GALNT15 | 13.0769788 | -4.091805278 | 4.46576E-10 |
| [ENSCAFG00000015192](http://www.ensembl.org/id/ENSCAFG00000015192) | B3GNT3 | 13.06437493 | -9.677046242 | 0 |
| [ENSCAFG00000000079](http://www.ensembl.org/id/ENSCAFG00000000079) | KIAA1468 | 13.04766593 | -1.832619441 | 2.31846E-05 |
| [ENSCAFG00000016679](http://www.ensembl.org/id/ENSCAFG00000016679) | MAP3K9 | 12.9655026 | -5.213603812 | 0 |
| [ENSCAFG00000000710](http://www.ensembl.org/id/ENSCAFG00000000710) | SLC27A6 | 12.9283203 | -4.329500844 | 1.96164E-11 |
| [ENSCAFG00000019437](http://www.ensembl.org/id/ENSCAFG00000019437) | NOXA1 | 12.91198142 | -2.639286763 | 8.61499E-07 |
| [ENSCAFG00000009632](http://www.ensembl.org/id/ENSCAFG00000009632) | TYRO3 | 12.90932259 | -1.64252055 | 0.000635605 |
| [ENSCAFG00000013121](http://www.ensembl.org/id/ENSCAFG00000013121) | RNASEL | 12.8826383 | -1.370551602 | 0.006239885 |
| [ENSCAFG00000012112](http://www.ensembl.org/id/ENSCAFG00000012112) | ACE2 | 12.87123647 | -5.895003105 | 1.67156E-14 |
| [ENSCAFG00000001326](http://www.ensembl.org/id/ENSCAFG00000001326) | TEAD3 | 12.83940057 | -1.479176985 | 0.000640873 |
| [ENSCAFG00000014679](http://www.ensembl.org/id/ENSCAFG00000014679) | PLEKHH3 | 12.83928373 | -1.42697217 | 0.014652824 |
| [ENSCAFG00000004788](http://www.ensembl.org/id/ENSCAFG00000004788) | TFCP2L1 | 12.78063181 | -6.855905113 | 0 |
| [ENSCAFG00000031029](http://www.ensembl.org/id/ENSCAFG00000031029) | HRAS | 12.76557292 | -1.625491293 | 0.00042495 |
| [ENSCAFG00000007514](http://www.ensembl.org/id/ENSCAFG00000007514) | IMMP1L | 12.7241171 | -1.2661012 | 0.033771051 |
| [ENSCAFG00000000480](http://www.ensembl.org/id/ENSCAFG00000000480) | NIPAL2 | 12.70485045 | -2.645383955 | 2.54292E-06 |
| [ENSCAFG00000020053](http://www.ensembl.org/id/ENSCAFG00000020053) | PALMD | 12.67206709 | -2.570000304 | 0.002542907 |
| [ENSCAFG00000011605](http://www.ensembl.org/id/ENSCAFG00000011605) | EFS | 12.6699363 | -1.340896384 | 0.008794793 |
| [ENSCAFG00000009527](http://www.ensembl.org/id/ENSCAFG00000009527) | RREB1 | 12.66766536 | -1.785841633 | 2.14198E-05 |
| [ENSCAFG00000006203](http://www.ensembl.org/id/ENSCAFG00000006203) | FCHSD1 | 12.63977594 | -1.694988565 | 0.002830059 |
| [ENSCAFG00000008510](http://www.ensembl.org/id/ENSCAFG00000008510) | CHMP4C | 12.54671721 | -4.339023281 | 1.49664E-06 |
| [ENSCAFG00000017165](http://www.ensembl.org/id/ENSCAFG00000017165) | PMVK | 12.52513124 | -1.651170041 | 0.005995969 |
| [ENSCAFG00000028558](http://www.ensembl.org/id/ENSCAFG00000028558) | FAM46B | 12.49755728 | -2.64463363 | 3.20905E-09 |
| [ENSCAFG00000006076](http://www.ensembl.org/id/ENSCAFG00000006076) | NAXD | 12.40783374 | -1.385744598 | 0.029443539 |
| [ENSCAFG00000015819](http://www.ensembl.org/id/ENSCAFG00000015819) | SYNE2 | 12.40764726 | -1.971346683 | 0.000271622 |
| [ENSCAFG00000004888](http://www.ensembl.org/id/ENSCAFG00000004888) | EIF2B4 | 12.36538604 | -1.092745532 | 0.020929422 |
| [ENSCAFG00000013690](http://www.ensembl.org/id/ENSCAFG00000013690) | PAX9 | 12.36085208 | -3.556739945 | 7.52039E-08 |
| [ENSCAFG00000003200](http://www.ensembl.org/id/ENSCAFG00000003200) | SH3YL1 | 12.30152916 | -8.164356369 | 0 |
| [ENSCAFG00000011533](http://www.ensembl.org/id/ENSCAFG00000011533) | TARBP1 | 12.29934264 | -1.382873558 | 0.005893349 |
| [ENSCAFG00000019867](http://www.ensembl.org/id/ENSCAFG00000019867) | WDR47 | 12.29540367 | -1.713669489 | 0.000264462 |
| [ENSCAFG00000016394](http://www.ensembl.org/id/ENSCAFG00000016394) | PLEK2 | 12.26885428 | -1.541867824 | 0.011825151 |
| [ENSCAFG00000005507](http://www.ensembl.org/id/ENSCAFG00000005507) | ACVR2A | 12.2350661 | -2.283713502 | 5.57909E-07 |
| [ENSCAFG00000020374](http://www.ensembl.org/id/ENSCAFG00000020374) | ELMO3 | 12.21003557 | -1.401931799 | 0.002968829 |
| [ENSCAFG00000007419](http://www.ensembl.org/id/ENSCAFG00000007419) | DNASE1L3 | 12.19240505 | -2.666611638 | 0.001270545 |
| [ENSCAFG00000009484](http://www.ensembl.org/id/ENSCAFG00000009484) | MFSD6 | 12.18334832 | -1.558709656 | 0.025421497 |
| [ENSCAFG00000032247](http://www.ensembl.org/id/ENSCAFG00000032247) | CBD103 | 12.14940309 | -6.623107681 | 0 |
| [ENSCAFG00000008061](http://www.ensembl.org/id/ENSCAFG00000008061) | ARHGEF3 | 12.10355219 | -1.592842563 | 0.000216851 |
| [ENSCAFG00000004213](http://www.ensembl.org/id/ENSCAFG00000004213) | ARHGEF4 | 12.09999638 | -2.957610067 | 8.33104E-08 |
| [ENSCAFG00000015936](http://www.ensembl.org/id/ENSCAFG00000015936) | EPHA4 | 12.05035893 | -3.784397909 | 3.25704E-07 |
| [ENSCAFG00000029529](http://www.ensembl.org/id/ENSCAFG00000029529) | KLK10 | 12.04110114 | -11.29032103 | 0 |
| [ENSCAFG00000006752](http://www.ensembl.org/id/ENSCAFG00000006752) | SCYL2 | 12.02663747 | -1.093519227 | 0.026971066 |
| [ENSCAFG00000017891](http://www.ensembl.org/id/ENSCAFG00000017891) | DEGS2 | 11.99255934 | -2.826737687 | 3.94153E-05 |
| [ENSCAFG00000002397](http://www.ensembl.org/id/ENSCAFG00000002397) | SHB | 11.91225819 | -1.914957682 | 0.000361816 |
| [ENSCAFG00000018807](http://www.ensembl.org/id/ENSCAFG00000018807) | IMPA2 | 11.87871215 | -2.575581838 | 6.79834E-07 |
| [ENSCAFG00000017656](http://www.ensembl.org/id/ENSCAFG00000017656) | PSTPIP2 | 11.86978609 | -1.375388498 | 0.009182162 |
| [ENSCAFG00000029577](http://www.ensembl.org/id/ENSCAFG00000029577) | RGS12 | 11.84087195 | -1.431055935 | 0.003052394 |
| [ENSCAFG00000017611](http://www.ensembl.org/id/ENSCAFG00000017611) | UACA | 11.73241161 | -1.505355036 | 0.001130219 |
| [ENSCAFG00000023923](http://www.ensembl.org/id/ENSCAFG00000023923) | VSIG10L | 11.72203298 | -4.021121331 | 0 |
| [ENSCAFG00000028609](http://www.ensembl.org/id/ENSCAFG00000028609) | TNNC2 | 11.70340552 | -3.313621428 | 0.007517892 |
| [ENSCAFG00000000692](http://www.ensembl.org/id/ENSCAFG00000000692) | SELENOO | 11.70161037 | -1.122203503 | 0.019255889 |
| [ENSCAFG00000012981](http://www.ensembl.org/id/ENSCAFG00000012981) | PLA2G3 | 11.68708949 | -4.759423241 | 8.03158E-08 |
| [ENSCAFG00000013274](http://www.ensembl.org/id/ENSCAFG00000013274) | DUSP16 | 11.66778272 | -1.208722026 | 0.018722844 |
| [ENSCAFG00000014374](http://www.ensembl.org/id/ENSCAFG00000014374) | NYAP1 | 11.6365439 | -3.309951893 | 8.56745E-10 |
| [ENSCAFG00000013614](http://www.ensembl.org/id/ENSCAFG00000013614) | DTX2 | 11.6320125 | -1.239212869 | 0.032031633 |
| [ENSCAFG00000010199](http://www.ensembl.org/id/ENSCAFG00000010199) | NFRKB | 11.62159479 | -2.592005009 | 5.27351E-11 |
| [ENSCAFG00000019289](http://www.ensembl.org/id/ENSCAFG00000019289) | SGSM2 | 11.5971618 | -1.378485349 | 0.007464542 |
| [ENSCAFG00000010201](http://www.ensembl.org/id/ENSCAFG00000010201) | MFSD13A | 11.49301976 | -1.564790751 | 0.011043499 |
| [ENSCAFG00000004082](http://www.ensembl.org/id/ENSCAFG00000004082) | ABTB1 | 11.473675 | -1.229627951 | 0.006979672 |
| [ENSCAFG00000012456](http://www.ensembl.org/id/ENSCAFG00000012456) | UBR3 | 11.40854699 | -1.085494387 | 0.030554273 |
| [ENSCAFG00000004757](http://www.ensembl.org/id/ENSCAFG00000004757) | PHLDB3 | 11.3855265 | -3.178104588 | 2.26172E-12 |
| [ENSCAFG00000020223](http://www.ensembl.org/id/ENSCAFG00000020223) | PKN2 | 11.38351779 | -1.209190973 | 0.007896227 |
| [ENSCAFG00000012207](http://www.ensembl.org/id/ENSCAFG00000012207) | SLC9A1 | 11.37787091 | -1.18083017 | 0.028140445 |
| [ENSCAFG00000017367](http://www.ensembl.org/id/ENSCAFG00000017367) | NIPAL4 | 11.36823391 | -5.636521888 | 0 |
| [ENSCAFG00000002327](http://www.ensembl.org/id/ENSCAFG00000002327) | FAM83B | 11.35691949 | -6.902951987 | 0 |
| [ENSCAFG00000018810](http://www.ensembl.org/id/ENSCAFG00000018810) | MKL2 | 11.34112646 | -1.282869887 | 0.013568416 |
| [ENSCAFG00000019972](http://www.ensembl.org/id/ENSCAFG00000019972) | RNPC3 | 11.33808284 | -1.445788836 | 0.012904277 |
| [ENSCAFG00000024500](http://www.ensembl.org/id/ENSCAFG00000024500) | PRRG2 | 11.31572678 | -4.188070884 | 1.23159E-12 |
| [ENSCAFG00000018300](http://www.ensembl.org/id/ENSCAFG00000018300) | PPP1R13B | 11.2734106 | -1.722652231 | 0.000857423 |
| [ENSCAFG00000032339](http://www.ensembl.org/id/ENSCAFG00000032339) | CYP2A13 | 11.26094592 | -6.408644624 | 2.19488E-09 |
| [ENSCAFG00000004321](http://www.ensembl.org/id/ENSCAFG00000004321) | TSPAN1 | 11.23532252 | -7.626618447 | 0 |
| [ENSCAFG00000000005](http://www.ensembl.org/id/ENSCAFG00000000005) | PARD6G | 11.20885408 | -2.57389814 | 0.000116861 |
| [ENSCAFG00000013219](http://www.ensembl.org/id/ENSCAFG00000013219) | BNC1 | 11.15855623 | -5.912726944 | 1.62784E-12 |
| [ENSCAFG00000002319](http://www.ensembl.org/id/ENSCAFG00000002319) | KIAA1211L | 11.12618582 | -2.740556577 | 6.41839E-05 |
| [ENSCAFG00000008071](http://www.ensembl.org/id/ENSCAFG00000008071) | FAM160A1 | 11.11859015 | -4.328787678 | 8.63545E-09 |
| [ENSCAFG00000012433](http://www.ensembl.org/id/ENSCAFG00000012433) | PER2 | 11.05694787 | -2.72994452 | 1.9725E-07 |
| [ENSCAFG00000008853](http://www.ensembl.org/id/ENSCAFG00000008853) | TIAM1 | 11.05614557 | -3.204869303 | 1.9498E-13 |
| [ENSCAFG00000014005](http://www.ensembl.org/id/ENSCAFG00000014005) | ANGPTL1 | 11.04530522 | -2.31830393 | 0.00919921 |
| [ENSCAFG00000009332](http://www.ensembl.org/id/ENSCAFG00000009332) | C15orf62 | 10.99024352 | -3.485552523 | 7.2252E-06 |
| [ENSCAFG00000004256](http://www.ensembl.org/id/ENSCAFG00000004256) | PRKD2 | 10.96736298 | -1.447863181 | 0.000409003 |
| [ENSCAFG00000019377](http://www.ensembl.org/id/ENSCAFG00000019377) | CAMKK1 | 10.93835796 | -2.701249868 | 6.17582E-09 |
| [ENSCAFG00000006743](http://www.ensembl.org/id/ENSCAFG00000006743) | PCMTD1 | 10.92833625 | -1.228744579 | 0.010498486 |
| [ENSCAFG00000016017](http://www.ensembl.org/id/ENSCAFG00000016017) | KRT24 | 10.9282437 | -7.795783141 | 0 |
| [ENSCAFG00000007629](http://www.ensembl.org/id/ENSCAFG00000007629) | OTUD4 | 10.91046586 | -1.120466487 | 0.027057727 |
| [ENSCAFG00000008844](http://www.ensembl.org/id/ENSCAFG00000008844) | KLHL2 | 10.90940085 | -1.345815179 | 0.002029042 |
| [ENSCAFG00000002017](http://www.ensembl.org/id/ENSCAFG00000002017) | FAM214B | 10.85567 | -1.386473159 | 0.00571923 |
| [ENSCAFG00000019394](http://www.ensembl.org/id/ENSCAFG00000019394) | ARRDC1 | 10.85470871 | -1.592352059 | 0.000287297 |
| [ENSCAFG00000002741](http://www.ensembl.org/id/ENSCAFG00000002741) | MYO6 | 10.81560496 | -1.823029955 | 2.91977E-05 |
| [ENSCAFG00000017254](http://www.ensembl.org/id/ENSCAFG00000017254) | ATP2A1 | 10.78443381 | -3.015009062 | 0.000589802 |
| [ENSCAFG00000003786](http://www.ensembl.org/id/ENSCAFG00000003786) | LAMB4 | 10.76789625 | -7.738614171 | 0 |
| [ENSCAFG00000003242](http://www.ensembl.org/id/ENSCAFG00000003242) | BSPRY | 10.75773981 | -4.146914136 | 1.19231E-08 |
| [ENSCAFG00000012293](http://www.ensembl.org/id/ENSCAFG00000012293) | ADCY4 | 10.70578961 | -1.624778055 | 0.008973032 |
| [ENSCAFG00000015196](http://www.ensembl.org/id/ENSCAFG00000015196) | SCNN1A | 10.59873541 | -3.050406185 | 8.43256E-10 |
| [ENSCAFG00000001101](http://www.ensembl.org/id/ENSCAFG00000001101) | PTPRK | 10.55209235 | -1.326489693 | 0.036749387 |
| [ENSCAFG00000018801](http://www.ensembl.org/id/ENSCAFG00000018801) | MPPE1 | 10.53793137 | -1.303263429 | 0.023494584 |
| [ENSCAFG00000020030](http://www.ensembl.org/id/ENSCAFG00000020030) | KYAT1 | 10.52840483 | -2.860727272 | 2.61803E-05 |
| [ENSCAFG00000012710](http://www.ensembl.org/id/ENSCAFG00000012710) | SLCO4A1 | 10.45844718 | -2.353073772 | 0.000983178 |
| [ENSCAFG00000030099](http://www.ensembl.org/id/ENSCAFG00000030099) | C1D | 10.43765731 | -1.144604063 | 0.033723033 |
| [ENSCAFG00000012494](http://www.ensembl.org/id/ENSCAFG00000012494) | TACC2 | 10.4329087 | -1.274138941 | 0.014738514 |
| [ENSCAFG00000006237](http://www.ensembl.org/id/ENSCAFG00000006237) | ACPP | 10.43140197 | -4.023696479 | 1.7739E-10 |
| [ENSCAFG00000003175](http://www.ensembl.org/id/ENSCAFG00000003175) | AFTPH | 10.4179904 | -1.422449193 | 0.000585969 |
| [ENSCAFG00000011139](http://www.ensembl.org/id/ENSCAFG00000011139) | ARSD | 10.3682296 | -2.426715313 | 1.22037E-05 |
| [ENSCAFG00000015898](http://www.ensembl.org/id/ENSCAFG00000015898) | RBM47 | 10.36488841 | -3.282516004 | 8.11383E-13 |
| [ENSCAFG00000011529](http://www.ensembl.org/id/ENSCAFG00000011529) | AP1G2 | 10.34759815 | -1.330190241 | 0.00399672 |
| [ENSCAFG00000019951](http://www.ensembl.org/id/ENSCAFG00000019951) | VAV3 | 10.32899386 | -2.210086893 | 5.40955E-06 |
| [ENSCAFG00000019445](http://www.ensembl.org/id/ENSCAFG00000019445) | NRARP | 10.32344241 | -2.365118521 | 0.004111777 |
| [ENSCAFG00000008274](http://www.ensembl.org/id/ENSCAFG00000008274) | ARHGEF28 | 10.31963002 | -1.943343479 | 3.66514E-05 |
| [ENSCAFG00000001001](http://www.ensembl.org/id/ENSCAFG00000001001) | ZHX1 | 10.24814748 | -1.436546395 | 0.003555679 |
| [ENSCAFG00000004223](http://www.ensembl.org/id/ENSCAFG00000004223) | DTNB | 10.23565208 | -1.446350462 | 0.009206889 |
| [ENSCAFG00000012095](http://www.ensembl.org/id/ENSCAFG00000012095) | AHDC1 | 10.21679232 | -1.174766372 | 0.013323404 |
| [ENSCAFG00000004502](http://www.ensembl.org/id/ENSCAFG00000004502) | KLC3 | 10.21558535 | -4.983898262 | 0 |
| [ENSCAFG00000010101](http://www.ensembl.org/id/ENSCAFG00000010101) | KIF13A | 10.20438452 | -1.070677102 | 0.037572399 |
| [ENSCAFG00000023398](http://www.ensembl.org/id/ENSCAFG00000023398) | SULT1C3 | 10.17769206 | -7.663580631 | 9.41352E-13 |
| [ENSCAFG00000002515](http://www.ensembl.org/id/ENSCAFG00000002515) | MACC1 | 10.15780722 | -5.993882852 | 7.81035E-14 |
| [ENSCAFG00000010186](http://www.ensembl.org/id/ENSCAFG00000010186) | RAB29 | 10.1303103 | -2.201078853 | 1.47115E-05 |
| [ENSCAFG00000011268](http://www.ensembl.org/id/ENSCAFG00000011268) | B3GALNT2 | 10.1232906 | -1.538065457 | 0.00555978 |
| [ENSCAFG00000017871](http://www.ensembl.org/id/ENSCAFG00000017871) | FAT2 | 10.10026093 | -7.059346028 | 0 |
| [ENSCAFG00000006392](http://www.ensembl.org/id/ENSCAFG00000006392) | ACKR4 | 10.09485533 | -5.57817556 | 3.205E-11 |
| [ENSCAFG00000028630](http://www.ensembl.org/id/ENSCAFG00000028630) | TRIM7 | 10.08912737 | -2.015384659 | 0.000142925 |
| [ENSCAFG00000005526](http://www.ensembl.org/id/ENSCAFG00000005526) | IKBKB | 10.06808321 | -1.111970709 | 0.020200624 |
| [ENSCAFG00000014661](http://www.ensembl.org/id/ENSCAFG00000014661) | WNT4 | 10.04296308 | -1.864553435 | 0.012993578 |
| [ENSCAFG00000008305](http://www.ensembl.org/id/ENSCAFG00000008305) | C21orf91 | 10.04050379 | -2.031059028 | 0.004333144 |
| [ENSCAFG00000017082](http://www.ensembl.org/id/ENSCAFG00000017082) | WWC1 | 10.03287188 | -2.268240032 | 0.000169885 |
| [ENSCAFG00000005225](http://www.ensembl.org/id/ENSCAFG00000005225) | PLB1 | 10.03151038 | -6.820846713 | 0 |
| [ENSCAFG00000019962](http://www.ensembl.org/id/ENSCAFG00000019962) | TAF1C | 10.02469779 | -1.17952722 | 0.027523515 |
| [ENSCAFG00000007208](http://www.ensembl.org/id/ENSCAFG00000007208) | KRT76 | 10.00303904 | -7.781596414 | 0 |
| [ENSCAFG00000029158](http://www.ensembl.org/id/ENSCAFG00000029158) | ZNF385A | 10.00162783 | -1.206359656 | 0.019937273 |
| [ENSCAFG00000016857](http://www.ensembl.org/id/ENSCAFG00000016857) | SEMA4A | 9.994005505 | -1.81387975 | 0.00156811 |
| [ENSCAFG00000018288](http://www.ensembl.org/id/ENSCAFG00000018288) | CAMSAP3 | 9.963117162 | -3.909408456 | 1.5191E-08 |
| [ENSCAFG00000001360](http://www.ensembl.org/id/ENSCAFG00000001360) | CBX7 | 9.953963361 | -1.584725254 | 0.002405717 |
| [ENSCAFG00000008986](http://www.ensembl.org/id/ENSCAFG00000008986) | RASAL1 | 9.914484962 | -5.231825243 | 0 |
| [ENSCAFG00000000189](http://www.ensembl.org/id/ENSCAFG00000000189) | SLC18B1 | 9.909632562 | -1.627121631 | 0.00844389 |
| [ENSCAFG00000019602](http://www.ensembl.org/id/ENSCAFG00000019602) | PLEKHG5 | 9.908362769 | -1.181018553 | 0.006532075 |
| [ENSCAFG00000005335](http://www.ensembl.org/id/ENSCAFG00000005335) | CAPN14 | 9.877944805 | -4.171589184 | 6.41839E-05 |
| [ENSCAFG00000016928](http://www.ensembl.org/id/ENSCAFG00000016928) | ALOX15B | 9.820889456 | -3.350893167 | 3.01968E-08 |
| [ENSCAFG00000016359](http://www.ensembl.org/id/ENSCAFG00000016359) | PGAP3 | 9.794942605 | -1.712073509 | 0.006692919 |
| [ENSCAFG00000018051](http://www.ensembl.org/id/ENSCAFG00000018051) | DSG2 | 9.792433298 | -2.268080314 | 5.1995E-06 |
| [ENSCAFG00000012460](http://www.ensembl.org/id/ENSCAFG00000012460) | SMYD2 | 9.746954314 | -1.086201138 | 0.019978069 |
| [ENSCAFG00000008624](http://www.ensembl.org/id/ENSCAFG00000008624) | STBD1 | 9.687950405 | -1.276876072 | 0.036128652 |
| [ENSCAFG00000010206](http://www.ensembl.org/id/ENSCAFG00000010206) | CTSE | 9.677783344 | -2.730692499 | 0.032094638 |
| [ENSCAFG00000005470](http://www.ensembl.org/id/ENSCAFG00000005470) | RNF169 | 9.674192825 | -1.470752153 | 0.004504039 |
| [ENSCAFG00000017122](http://www.ensembl.org/id/ENSCAFG00000017122) | SULT1A1 | 9.647797535 | -1.580781213 | 0.002297132 |
| [ENSCAFG00000016661](http://www.ensembl.org/id/ENSCAFG00000016661) | GCNT3 | 9.64100525 | -8.821882395 | 0 |
| [ENSCAFG00000012803](http://www.ensembl.org/id/ENSCAFG00000012803) | RIN1 | 9.615192166 | -2.03379502 | 2.60136E-05 |
| [ENSCAFG00000000277](http://www.ensembl.org/id/ENSCAFG00000000277) | CCDC28A | 9.591918112 | -1.201026622 | 0.047442502 |
| [ENSCAFG00000015776](http://www.ensembl.org/id/ENSCAFG00000015776) | CCDC120 | 9.53471679 | -2.429144358 | 3.55936E-07 |
| [ENSCAFG00000009550](http://www.ensembl.org/id/ENSCAFG00000009550) | RTF1 | 9.504340557 | -1.103694598 | 0.031809548 |
| [ENSCAFG00000019764](http://www.ensembl.org/id/ENSCAFG00000019764) | DENND2D | 9.480428801 | -1.643396382 | 0.01711687 |
| [ENSCAFG00000002824](http://www.ensembl.org/id/ENSCAFG00000002824) | SH3BGRL2 | 9.451263329 | -3.663971262 | 1.63027E-06 |
| [ENSCAFG00000006782](http://www.ensembl.org/id/ENSCAFG00000006782) | LNX2 | 9.437376268 | -1.311893963 | 0.003816453 |
| [ENSCAFG00000001095](http://www.ensembl.org/id/ENSCAFG00000001095) | TEF | 9.420853612 | -2.724753228 | 2.09599E-08 |
| [ENSCAFG00000019970](http://www.ensembl.org/id/ENSCAFG00000019970) | OSGIN1 | 9.41181083 | -1.760822808 | 0.000574586 |
| [ENSCAFG00000013672](http://www.ensembl.org/id/ENSCAFG00000013672) | SORD | 9.410324541 | -2.252987257 | 1.74846E-06 |
| [ENSCAFG00000029600](http://www.ensembl.org/id/ENSCAFG00000029600) | OTX1 | 9.400832053 | -7.139509013 | 0 |
| [ENSCAFG00000007691](http://www.ensembl.org/id/ENSCAFG00000007691) | GALNT18 | 9.387902126 | -2.716555932 | 4.82848E-07 |
| [ENSCAFG00000017687](http://www.ensembl.org/id/ENSCAFG00000017687) | SCNN1B | 9.35060839 | -5.350726785 | 3.39927E-12 |
| [ENSCAFG00000017080](http://www.ensembl.org/id/ENSCAFG00000017080) | EPN3 | 9.340281336 | -6.719854591 | 0 |
| [ENSCAFG00000009344](http://www.ensembl.org/id/ENSCAFG00000009344) | SLC22A23 | 9.339356126 | -2.266646437 | 4.7045E-05 |
| [ENSCAFG00000005925](http://www.ensembl.org/id/ENSCAFG00000005925) | VIT | 9.321573006 | -2.321768487 | 0.0222256 |
| [ENSCAFG00000003800](http://www.ensembl.org/id/ENSCAFG00000003800) | PPFIA3 | 9.307617618 | -4.786054379 | 0 |
| [ENSCAFG00000008344](http://www.ensembl.org/id/ENSCAFG00000008344) | CDKL2 | 9.252414998 | -1.436029982 | 0.011676021 |
| [ENSCAFG00000032262](http://www.ensembl.org/id/ENSCAFG00000032262) | DHRS1 | 9.245422719 | -2.224265392 | 1.71326E-05 |
| [ENSCAFG00000004254](http://www.ensembl.org/id/ENSCAFG00000004254) | FAAH | 9.225864636 | -2.246306861 | 4.25502E-05 |
| [ENSCAFG00000015453](http://www.ensembl.org/id/ENSCAFG00000015453) | PITPNM3 | 9.222392206 | -3.909153396 | 1.18618E-05 |
| [ENSCAFG00000010937](http://www.ensembl.org/id/ENSCAFG00000010937) | CHKA | 9.137903736 | -1.591052703 | 0.002924741 |
| [ENSCAFG00000005415](http://www.ensembl.org/id/ENSCAFG00000005415) | ARRB1 | 9.10095499 | -1.572407129 | 0.009334874 |
| [ENSCAFG00000006412](http://www.ensembl.org/id/ENSCAFG00000006412) | HAL | 9.052170666 | -9.167994737 | 0 |
| [ENSCAFG00000000067](http://www.ensembl.org/id/ENSCAFG00000000067) | KDSR | 9.035442733 | -1.014596504 | 0.049302544 |
| [ENSCAFG00000000323](http://www.ensembl.org/id/ENSCAFG00000000323) | USP15 | 8.98677924 | -1.099557802 | 0.049096317 |
| [ENSCAFG00000009911](http://www.ensembl.org/id/ENSCAFG00000009911) | FBXW4 | 8.937201252 | -1.563533084 | 0.001649261 |
| [ENSCAFG00000010885](http://www.ensembl.org/id/ENSCAFG00000010885) | TPPP | 8.906156255 | -1.503344434 | 0.024693584 |
| [ENSCAFG00000005330](http://www.ensembl.org/id/ENSCAFG00000005330) | SH2D4A | 8.888525227 | -3.775404658 | 1.16226E-11 |
| [ENSCAFG00000000235](http://www.ensembl.org/id/ENSCAFG00000000235) | N4BP3 | 8.862847309 | -2.583109007 | 1.59656E-07 |
| [ENSCAFG00000017127](http://www.ensembl.org/id/ENSCAFG00000017127) | SGF29 | 8.852076703 | -1.402903708 | 0.046967613 |
| [ENSCAFG00000007616](http://www.ensembl.org/id/ENSCAFG00000007616) | PITPNM2 | 8.83603376 | -1.359054801 | 0.006576704 |
| [ENSCAFG00000015949](http://www.ensembl.org/id/ENSCAFG00000015949) | ALOX15 | 8.835717295 | -3.79997913 | 1.5014E-08 |
| [ENSCAFG00000014842](http://www.ensembl.org/id/ENSCAFG00000014842) | MYOZ1 | 8.835040784 | -2.855382793 | 0.016489812 |
| [ENSCAFG00000012254](http://www.ensembl.org/id/ENSCAFG00000012254) | LTB4R | 8.829940603 | -2.582967302 | 0.000216975 |
| [ENSCAFG00000020029](http://www.ensembl.org/id/ENSCAFG00000020029) | SLC35A3 | 8.827965635 | -1.341373884 | 0.020927113 |
| [ENSCAFG00000005435](http://www.ensembl.org/id/ENSCAFG00000005435) | METTL17 | 8.818746075 | -1.470404753 | 0.003651594 |
| [ENSCAFG00000018059](http://www.ensembl.org/id/ENSCAFG00000018059) | ANKRD9 | 8.818308281 | -1.530980668 | 0.038949479 |
| [ENSCAFG00000006757](http://www.ensembl.org/id/ENSCAFG00000006757) | PPFIBP2 | 8.784607688 | -2.31807973 | 4.22134E-05 |
| [ENSCAFG00000010571](http://www.ensembl.org/id/ENSCAFG00000010571) | DAPP1 | 8.766173286 | -1.982803736 | 0.009164663 |
| [ENSCAFG00000018322](http://www.ensembl.org/id/ENSCAFG00000018322) | LRRC8E | 8.75400996 | -2.931549785 | 1.66018E-08 |
| [ENSCAFG00000018602](http://www.ensembl.org/id/ENSCAFG00000018602) | SH2D3A | 8.696993794 | -4.68656369 | 1.67156E-14 |
| [ENSCAFG00000010010](http://www.ensembl.org/id/ENSCAFG00000010010) | N4BP1 | 8.692675587 | -1.127145637 | 0.015334833 |
| [ENSCAFG00000024641](http://www.ensembl.org/id/ENSCAFG00000024641) | KIAA1671 | 8.690625972 | -3.568257537 | 1.67156E-14 |
| [ENSCAFG00000019841](http://www.ensembl.org/id/ENSCAFG00000019841) | CELSR2 | 8.687198757 | -2.311765961 | 0.003400525 |
| [ENSCAFG00000012390](http://www.ensembl.org/id/ENSCAFG00000012390) | NYNRIN | 8.66468309 | -1.566052578 | 0.000791096 |
| [ENSCAFG00000018982](http://www.ensembl.org/id/ENSCAFG00000018982) | MYO5B | 8.663955648 | -3.572387672 | 3.15943E-10 |
| [ENSCAFG00000031842](http://www.ensembl.org/id/ENSCAFG00000031842) | URAD | 8.662519843 | -9.477314423 | 0 |
| [ENSCAFG00000004892](http://www.ensembl.org/id/ENSCAFG00000004892) | DEDD2 | 8.64225514 | -1.277241739 | 0.009211147 |
| [ENSCAFG00000002635](http://www.ensembl.org/id/ENSCAFG00000002635) | RDH13 | 8.633183259 | -2.285224649 | 2.95854E-06 |
| [ENSCAFG00000002416](http://www.ensembl.org/id/ENSCAFG00000002416) | TDRD7 | 8.597931219 | -1.831990869 | 0.000420722 |
| [ENSCAFG00000001715](http://www.ensembl.org/id/ENSCAFG00000001715) | MOB3B | 8.563767355 | -2.135882639 | 0.001349594 |
| [ENSCAFG00000019405](http://www.ensembl.org/id/ENSCAFG00000019405) | PLCH2 | 8.556582898 | -7.22832828 | 0 |
| [ENSCAFG00000014224](http://www.ensembl.org/id/ENSCAFG00000014224) | IKZF2 | 8.47481436 | -3.893808891 | 9.39464E-11 |
| [ENSCAFG00000013981](http://www.ensembl.org/id/ENSCAFG00000013981) | RALGPS2 | 8.427762515 | -2.546835449 | 1.52954E-06 |
| [ENSCAFG00000003330](http://www.ensembl.org/id/ENSCAFG00000003330) | TMEM168 | 8.419234557 | -1.11865475 | 0.015752771 |
| [ENSCAFG00000010876](http://www.ensembl.org/id/ENSCAFG00000010876) | TET2 | 8.391128403 | -1.048973159 | 0.034545449 |
| [ENSCAFG00000017694](http://www.ensembl.org/id/ENSCAFG00000017694) | USP31 | 8.38292047 | -2.01503887 | 0.000377716 |
| [ENSCAFG00000002068](http://www.ensembl.org/id/ENSCAFG00000002068) | ADGRF1 | 8.380712472 | -3.424477228 | 0.000899907 |
| [ENSCAFG00000002224](http://www.ensembl.org/id/ENSCAFG00000002224) | ZNF169 | 8.378980631 | -1.25778116 | 0.01149733 |
| [ENSCAFG00000003503](http://www.ensembl.org/id/ENSCAFG00000003503) | ARHGEF5 | 8.306499653 | -3.457809847 | 5.77292E-07 |
| [ENSCAFG00000007775](http://www.ensembl.org/id/ENSCAFG00000007775) | NCOA2 | 8.304280182 | -1.31482291 | 0.012183798 |
| [ENSCAFG00000000789](http://www.ensembl.org/id/ENSCAFG00000000789) | WNT7B | 8.282207381 | -6.459758306 | 0 |
| [ENSCAFG00000016811](http://www.ensembl.org/id/ENSCAFG00000016811) | RHBG | 8.252745845 | -4.975324328 | 0 |
| [ENSCAFG00000009410](http://www.ensembl.org/id/ENSCAFG00000009410) | ZDHHC13 | 8.225638195 | -1.20405957 | 0.019532288 |
| [ENSCAFG00000017300](http://www.ensembl.org/id/ENSCAFG00000017300) | RABEP2 | 8.19188506 | -1.200903133 | 0.007087491 |
| [ENSCAFG00000005698](http://www.ensembl.org/id/ENSCAFG00000005698) | PDE2A | 8.129870926 | -2.394449948 | 0.007637531 |
| [ENSCAFG00000001762](http://www.ensembl.org/id/ENSCAFG00000001762) | TMEM229A | 8.074741564 | -6.99224761 | 0 |
| [ENSCAFG00000010536](http://www.ensembl.org/id/ENSCAFG00000010536) | CARMIL1 | 8.0592744 | -1.852539706 | 0.000568033 |
| [ENSCAFG00000015660](http://www.ensembl.org/id/ENSCAFG00000015660) | TMEM30B | 8.002540512 | -5.070274241 | 8.55179E-10 |
| [ENSCAFG00000018822](http://www.ensembl.org/id/ENSCAFG00000018822) | PATJ | 7.964707289 | -5.054861007 | 0 |
| [ENSCAFG00000032114](http://www.ensembl.org/id/ENSCAFG00000032114) | RCE1 | 7.954435219 | -1.692321429 | 0.000188673 |
| [ENSCAFG00000019611](http://www.ensembl.org/id/ENSCAFG00000019611) | CHTF18 | 7.954315913 | -2.231538523 | 1.8333E-06 |
| [ENSCAFG00000008198](http://www.ensembl.org/id/ENSCAFG00000008198) | KIF13B | 7.942346166 | -1.443125519 | 0.004034598 |
| [ENSCAFG00000008141](http://www.ensembl.org/id/ENSCAFG00000008141) | FBXW7 | 7.927072505 | -1.616469486 | 0.001661274 |
| [ENSCAFG00000008498](http://www.ensembl.org/id/ENSCAFG00000008498) | MEIS2 | 7.915069378 | -3.015606037 | 4.15837E-10 |
| [ENSCAFG00000019952](http://www.ensembl.org/id/ENSCAFG00000019952) | ATP2C2 | 7.856871558 | -5.28363047 | 0 |
| [ENSCAFG00000010582](http://www.ensembl.org/id/ENSCAFG00000010582) | BOC | 7.834162517 | -1.44826184 | 0.00477305 |
| [ENSCAFG00000012029](http://www.ensembl.org/id/ENSCAFG00000012029) | TGM5 | 7.828857404 | -8.385477976 | 0 |
| [ENSCAFG00000000275](http://www.ensembl.org/id/ENSCAFG00000000275) | NHSL1 | 7.827909378 | -1.729329516 | 0.000185936 |
| [ENSCAFG00000028962](http://www.ensembl.org/id/ENSCAFG00000028962) | SLC25A21 | 7.826358992 | -3.509467504 | 8.82034E-13 |
| [ENSCAFG00000008677](http://www.ensembl.org/id/ENSCAFG00000008677) | SSBP2 | 7.821719283 | -2.257700847 | 7.32927E-07 |
| [ENSCAFG00000008159](http://www.ensembl.org/id/ENSCAFG00000008159) | PLSCR4 | 7.819574982 | -1.613312063 | 0.043129049 |
| [ENSCAFG00000016306](http://www.ensembl.org/id/ENSCAFG00000016306) | ARAP2 | 7.78276335 | -2.224657188 | 2.71691E-06 |
| [ENSCAFG00000030962](http://www.ensembl.org/id/ENSCAFG00000030962) | ZNF524 | 7.78038299 | -1.60260746 | 0.018492934 |
| [ENSCAFG00000011188](http://www.ensembl.org/id/ENSCAFG00000011188) | GALNT3 | 7.777699273 | -2.5000943 | 5.955E-06 |
| [ENSCAFG00000011842](http://www.ensembl.org/id/ENSCAFG00000011842) | SESN2 | 7.756590188 | -2.101480595 | 0.000261081 |
| [ENSCAFG00000008664](http://www.ensembl.org/id/ENSCAFG00000008664) | PLEKHA7 | 7.746628606 | -3.076970967 | 1.8505E-06 |
| [ENSCAFG00000006727](http://www.ensembl.org/id/ENSCAFG00000006727) | TGM6 | 7.735948285 | -11.79992176 | 5.11479E-12 |
| [ENSCAFG00000005917](http://www.ensembl.org/id/ENSCAFG00000005917) | FERMT1 | 7.66950796 | -3.523864199 | 6.72601E-09 |
| [ENSCAFG00000020263](http://www.ensembl.org/id/ENSCAFG00000020263) | PTGS1 | 7.624570065 | -2.223032247 | 0.000852649 |
| [ENSCAFG00000024466](http://www.ensembl.org/id/ENSCAFG00000024466) | EFNA4 | 7.606417773 | -1.97794281 | 0.010960331 |
| [ENSCAFG00000009660](http://www.ensembl.org/id/ENSCAFG00000009660) | MORC3 | 7.590049311 | -1.310912056 | 0.002388682 |
| [ENSCAFG00000023362](http://www.ensembl.org/id/ENSCAFG00000023362) | SERPINB11 | 7.588393557 | -2.175444414 | 0.005800706 |
| [ENSCAFG00000005044](http://www.ensembl.org/id/ENSCAFG00000005044) | TBC1D4 | 7.58133658 | -1.323285018 | 0.002996316 |
| [ENSCAFG00000017137](http://www.ensembl.org/id/ENSCAFG00000017137) | TENM2 | 7.564589825 | -6.122537006 | 1.60508E-11 |
| [ENSCAFG00000016262](http://www.ensembl.org/id/ENSCAFG00000016262) | CGNL1 | 7.560947431 | -1.34157247 | 0.044227354 |
| [ENSCAFG00000002118](http://www.ensembl.org/id/ENSCAFG00000002118) | PON3 | 7.540438229 | -4.931477106 | 8.66135E-15 |
| [ENSCAFG00000012440](http://www.ensembl.org/id/ENSCAFG00000012440) | SLC16A9 | 7.52276636 | -4.08888353 | 1.43387E-05 |
| [ENSCAFG00000014270](http://www.ensembl.org/id/ENSCAFG00000014270) | CRAMP1 | 7.518755798 | -1.031755022 | 0.044023997 |
| [ENSCAFG00000013693](http://www.ensembl.org/id/ENSCAFG00000013693) | DUOX2 | 7.47593459 | -8.551717179 | 0 |
| [ENSCAFG00000019350](http://www.ensembl.org/id/ENSCAFG00000019350) | HES4 | 7.474693133 | -1.595149212 | 0.045231741 |
| [ENSCAFG00000009142](http://www.ensembl.org/id/ENSCAFG00000009142) | LPIN3 | 7.453613739 | -1.485503778 | 0.004008675 |
| [ENSCAFG00000032608](http://www.ensembl.org/id/ENSCAFG00000032608) | LURAP1L | 7.425887918 | -2.75380695 | 1.13376E-06 |
| [ENSCAFG00000018146](http://www.ensembl.org/id/ENSCAFG00000018146) | ALDH3A1 | 7.389484579 | -4.50659576 | 3.82046E-07 |
| [ENSCAFG00000001827](http://www.ensembl.org/id/ENSCAFG00000001827) | CROT | 7.35177898 | -1.07238438 | 0.044791951 |
| [ENSCAFG00000001502](http://www.ensembl.org/id/ENSCAFG00000001502) | CARD10 | 7.336835612 | -1.714977762 | 0.000101886 |
| [ENSCAFG00000016771](http://www.ensembl.org/id/ENSCAFG00000016771) | CASZ1 | 7.327772011 | -4.909469545 | 0 |
| [ENSCAFG00000010940](http://www.ensembl.org/id/ENSCAFG00000010940) | MCTP2 | 7.299919977 | -3.11843881 | 1.03857E-05 |
| [ENSCAFG00000015128](http://www.ensembl.org/id/ENSCAFG00000015128) | TMCO4 | 7.291721148 | -1.8454087 | 0.001216736 |
| [ENSCAFG00000023602](http://www.ensembl.org/id/ENSCAFG00000023602) | ECSCR | 7.2574846 | -2.1137891 | 0.00219835 |
| [ENSCAFG00000014503](http://www.ensembl.org/id/ENSCAFG00000014503) | TBX1 | 7.24354567 | -2.635897792 | 0.010505101 |
| [ENSCAFG00000015292](http://www.ensembl.org/id/ENSCAFG00000015292) | SMTNL2 | 7.235377235 | -3.489989147 | 3.09622E-07 |
| [ENSCAFG00000016838](http://www.ensembl.org/id/ENSCAFG00000016838) | KAT8 | 7.231875908 | -1.465177652 | 0.001013179 |
| [ENSCAFG00000029297](http://www.ensembl.org/id/ENSCAFG00000029297) | ANKRD22 | 7.215423681 | -2.596302242 | 8.91738E-05 |
| [ENSCAFG00000006811](http://www.ensembl.org/id/ENSCAFG00000006811) | SDCBP2 | 7.183285307 | -7.171916285 | 2.46133E-14 |
| [ENSCAFG00000011756](http://www.ensembl.org/id/ENSCAFG00000011756) | PLXNA2 | 7.176831478 | -1.424470527 | 0.004028178 |
| [ENSCAFG00000001791](http://www.ensembl.org/id/ENSCAFG00000001791) | ALDH1A1 | 7.134758793 | -4.566782204 | 4.90998E-07 |
| [ENSCAFG00000030851](http://www.ensembl.org/id/ENSCAFG00000030851) | HLF | 7.108773407 | -4.665723356 | 4.76952E-14 |
| [ENSCAFG00000006904](http://www.ensembl.org/id/ENSCAFG00000006904) | SLC52A3 | 7.094603109 | -6.983622534 | 0 |
| [ENSCAFG00000009166](http://www.ensembl.org/id/ENSCAFG00000009166) | CDS1 | 7.056730281 | -2.188482735 | 0.00130594 |
| [ENSCAFG00000001793](http://www.ensembl.org/id/ENSCAFG00000001793) | BTBD11 | 7.047381725 | -2.348272359 | 2.05661E-05 |
| [ENSCAFG00000000016](http://www.ensembl.org/id/ENSCAFG00000000016) | MBP | 7.0440318 | -2.47492046 | 5.54291E-05 |
| [ENSCAFG00000009322](http://www.ensembl.org/id/ENSCAFG00000009322) | DNAJC17 | 7.037282829 | -2.045947555 | 0.000249878 |
| [ENSCAFG00000003982](http://www.ensembl.org/id/ENSCAFG00000003982) | SLC5A9 | 7.019467879 | -10.90095694 | 0 |
| [ENSCAFG00000017511](http://www.ensembl.org/id/ENSCAFG00000017511) | NPR1 | 6.961552564 | -1.720849934 | 0.007331613 |
| [ENSCAFG00000007907](http://www.ensembl.org/id/ENSCAFG00000007907) | LRBA | 6.950867634 | -2.046353095 | 3.06552E-07 |
| [ENSCAFG00000019197](http://www.ensembl.org/id/ENSCAFG00000019197) | TJP3 | 6.903682764 | -3.789972681 | 2.02289E-09 |
| [ENSCAFG00000013426](http://www.ensembl.org/id/ENSCAFG00000013426) | KCNK7 | 6.834682112 | -3.46237327 | 9.36129E-07 |
| [ENSCAFG00000001853](http://www.ensembl.org/id/ENSCAFG00000001853) | ABCC10 | 6.832035003 | -1.105525973 | 0.012220112 |
| [ENSCAFG00000000253](http://www.ensembl.org/id/ENSCAFG00000000253) | PEX7 | 6.826367855 | -2.048032806 | 5.20519E-05 |
| [ENSCAFG00000028577](http://www.ensembl.org/id/ENSCAFG00000028577) | XK | 6.805114136 | -3.822877992 | 1.06012E-06 |
| [ENSCAFG00000007805](http://www.ensembl.org/id/ENSCAFG00000007805) | OCLN | 6.800594627 | -5.707425329 | 0 |
| [ENSCAFG00000030058](http://www.ensembl.org/id/ENSCAFG00000030058) | ECI1 | 6.770953004 | -1.83480808 | 0.002495933 |
| [ENSCAFG00000000214](http://www.ensembl.org/id/ENSCAFG00000000214) | CCDC112 | 6.764642941 | -1.407392286 | 0.015016795 |
| [ENSCAFG00000028891](http://www.ensembl.org/id/ENSCAFG00000028891) | SDR42E1 | 6.754228825 | -1.877918406 | 0.002150739 |
| [ENSCAFG00000007598](http://www.ensembl.org/id/ENSCAFG00000007598) | GGT7 | 6.748522591 | -1.624136723 | 0.011158622 |
| [ENSCAFG00000005373](http://www.ensembl.org/id/ENSCAFG00000005373) | SLC24A3 | 6.675147607 | -3.677558724 | 5.81285E-12 |
| [ENSCAFG00000002477](http://www.ensembl.org/id/ENSCAFG00000002477) | CORO2A | 6.667244813 | -2.582167076 | 6.97968E-06 |
| [ENSCAFG00000012999](http://www.ensembl.org/id/ENSCAFG00000012999) | PPIP5K1 | 6.665854222 | -2.408735074 | 2.67923E-06 |
| [ENSCAFG00000004575](http://www.ensembl.org/id/ENSCAFG00000004575) | ZNF296 | 6.656730828 | -1.976317238 | 0.002176633 |
| [ENSCAFG00000012891](http://www.ensembl.org/id/ENSCAFG00000012891) | PARD3B | 6.655782368 | -1.262918867 | 0.036084399 |
| [ENSCAFG00000016417](http://www.ensembl.org/id/ENSCAFG00000016417) | SLC34A2 | 6.640382275 | -5.206953779 | 6.59056E-07 |
| [ENSCAFG00000011476](http://www.ensembl.org/id/ENSCAFG00000011476) | PITPNC1 | 6.63196128 | -1.323202755 | 0.047246834 |
| [ENSCAFG00000000120](http://www.ensembl.org/id/ENSCAFG00000000120) | IL23A | 6.613994238 | -2.456625852 | 0.020118809 |
| [ENSCAFG00000001935](http://www.ensembl.org/id/ENSCAFG00000001935) | AKAP9 | 6.539018721 | -1.177854919 | 0.025647261 |
| [ENSCAFG00000018704](http://www.ensembl.org/id/ENSCAFG00000018704) | SLC1A3 | 6.531762346 | -1.712012175 | 0.003562123 |
| [ENSCAFG00000016330](http://www.ensembl.org/id/ENSCAFG00000016330) | CLN8 | 6.51899102 | -1.202992169 | 0.029676651 |
| [ENSCAFG00000031929](http://www.ensembl.org/id/ENSCAFG00000031929) | C3orf58 | 6.480725114 | -1.46952087 | 0.004433232 |
| [ENSCAFG00000020052](http://www.ensembl.org/id/ENSCAFG00000020052) | FRRS1 | 6.47276621 | -4.522727843 | 0 |
| [ENSCAFG00000001873](http://www.ensembl.org/id/ENSCAFG00000001873) | TCP11L2 | 6.431589853 | -1.634549236 | 0.001713477 |
| [ENSCAFG00000005941](http://www.ensembl.org/id/ENSCAFG00000005941) | KCNK6 | 6.410191598 | -1.171728932 | 0.049214206 |
| [ENSCAFG00000019509](http://www.ensembl.org/id/ENSCAFG00000019509) | LRRC26 | 6.367933755 | -7.155234085 | 1.67156E-14 |
| [ENSCAFG00000017561](http://www.ensembl.org/id/ENSCAFG00000017561) | CCDC88C | 6.359507489 | -1.900636659 | 0.000200553 |
| [ENSCAFG00000001453](http://www.ensembl.org/id/ENSCAFG00000001453) | RASEF | 6.345978805 | -7.734390047 | 0 |
| [ENSCAFG00000031156](http://www.ensembl.org/id/ENSCAFG00000031156) | TMEM171 | 6.34262618 | -4.803903922 | 4.44868E-06 |
| [ENSCAFG00000002865](http://www.ensembl.org/id/ENSCAFG00000002865) | NFE2L3 | 6.326385022 | -2.264103614 | 0.000620515 |
| [ENSCAFG00000014853](http://www.ensembl.org/id/ENSCAFG00000014853) | ALPL | 6.321202091 | -1.751993638 | 0.031825581 |
| [ENSCAFG00000001890](http://www.ensembl.org/id/ENSCAFG00000001890) | MAMDC2 | 6.310031713 | -1.876758484 | 0.001173598 |
| [ENSCAFG00000004995](http://www.ensembl.org/id/ENSCAFG00000004995) | DMAC2 | 6.250267543 | -1.141978205 | 0.047546321 |
| [ENSCAFG00000002550](http://www.ensembl.org/id/ENSCAFG00000002550) | SIX2 | 6.240317833 | -2.140327616 | 0.007864391 |
| [ENSCAFG00000004764](http://www.ensembl.org/id/ENSCAFG00000004764) | VWA8 | 6.22684006 | -1.720726504 | 6.67431E-05 |
| [ENSCAFG00000004328](http://www.ensembl.org/id/ENSCAFG00000004328) | ADGRF3 | 6.203081134 | -4.109345123 | 1.28989E-08 |
| [ENSCAFG00000002905](http://www.ensembl.org/id/ENSCAFG00000002905) | KLK4 | 6.202997813 | -2.232388078 | 0.024370248 |
| [ENSCAFG00000016700](http://www.ensembl.org/id/ENSCAFG00000016700) | RORA | 6.176896641 | -1.99893507 | 0.002194574 |
| [ENSCAFG00000005636](http://www.ensembl.org/id/ENSCAFG00000005636) | CARD14 | 6.160800999 | -9.618344576 | 0 |
| [ENSCAFG00000004826](http://www.ensembl.org/id/ENSCAFG00000004826) | SLC6A9 | 6.154037927 | -1.865809752 | 0.024061101 |
| [ENSCAFG00000008674](http://www.ensembl.org/id/ENSCAFG00000008674) | RASGRP1 | 6.140443683 | -3.733446532 | 3.22734E-12 |
| [ENSCAFG00000011089](http://www.ensembl.org/id/ENSCAFG00000011089) | ARNTL2 | 6.133559296 | -2.019930724 | 0.001459129 |
| [ENSCAFG00000011917](http://www.ensembl.org/id/ENSCAFG00000011917) | TMEM62 | 6.11482051 | -1.970538893 | 0.000989547 |
| [ENSCAFG00000001702](http://www.ensembl.org/id/ENSCAFG00000001702) | NMRK1 | 6.104180181 | -1.961940472 | 0.002810996 |
| [ENSCAFG00000013289](http://www.ensembl.org/id/ENSCAFG00000013289) | PBX1 | 6.049236491 | -1.886225739 | 0.018869224 |
| [ENSCAFG00000000712](http://www.ensembl.org/id/ENSCAFG00000000712) | CYP21 | 6.03977108 | -2.954068536 | 0.000472617 |
| [ENSCAFG00000011184](http://www.ensembl.org/id/ENSCAFG00000011184) | SIAE | 6.03132865 | -1.845956253 | 0.007205228 |
| [ENSCAFG00000010832](http://www.ensembl.org/id/ENSCAFG00000010832) | TC2N | 6.029936018 | -2.603910115 | 0.005186071 |
| [ENSCAFG00000003213](http://www.ensembl.org/id/ENSCAFG00000003213) | STRA8 | 5.998313291 | -9.447989179 | 0 |
| [ENSCAFG00000009490](http://www.ensembl.org/id/ENSCAFG00000009490) | KLHL8 | 5.987637866 | -1.705832016 | 0.000185583 |
| [ENSCAFG00000001720](http://www.ensembl.org/id/ENSCAFG00000001720) | C9orf72 | 5.983327517 | -1.491224455 | 0.007406754 |
| [ENSCAFG00000010450](http://www.ensembl.org/id/ENSCAFG00000010450) | SLC37A1 | 5.948949057 | -2.100171101 | 0.002039416 |
| [ENSCAFG00000014158](http://www.ensembl.org/id/ENSCAFG00000014158) | ATP13A4 | 5.946649609 | -5.711874419 | 3.7557E-11 |
| [ENSCAFG00000014351](http://www.ensembl.org/id/ENSCAFG00000014351) | AGFG2 | 5.936152178 | -1.188009049 | 0.032445552 |
| [ENSCAFG00000006800](http://www.ensembl.org/id/ENSCAFG00000006800) | FZD10 | 5.935427142 | -3.155978781 | 2.61004E-05 |
| [ENSCAFG00000023177](http://www.ensembl.org/id/ENSCAFG00000023177) | RNF223 | 5.933274133 | -4.541820263 | 4.24033E-07 |
| [ENSCAFG00000001545](http://www.ensembl.org/id/ENSCAFG00000001545) | TTC39B | 5.899749332 | -1.920394605 | 0.002270951 |
| [ENSCAFG00000003834](http://www.ensembl.org/id/ENSCAFG00000003834) | LIN7B | 5.838780596 | -1.545092001 | 0.027594995 |
| [ENSCAFG00000007586](http://www.ensembl.org/id/ENSCAFG00000007586) | MAST4 | 5.816079232 | -2.2922538 | 2.92204E-05 |
| [ENSCAFG00000000083](http://www.ensembl.org/id/ENSCAFG00000000083) | PIGN | 5.786142038 | -1.893023827 | 4.59945E-05 |
| [ENSCAFG00000019156](http://www.ensembl.org/id/ENSCAFG00000019156) | GABRE | 5.688452703 | -3.622954364 | 0.000331555 |
| [ENSCAFG00000016559](http://www.ensembl.org/id/ENSCAFG00000016559) | ZC4H2 | 5.684298687 | -1.504072345 | 0.032988234 |
| [ENSCAFG00000011353](http://www.ensembl.org/id/ENSCAFG00000011353) | DENND1B | 5.632681567 | -1.946876227 | 0.004223823 |
| [ENSCAFG00000013152](http://www.ensembl.org/id/ENSCAFG00000013152) | D2HGDH | 5.618693736 | -1.242824337 | 0.021202199 |
| [ENSCAFG00000019589](http://www.ensembl.org/id/ENSCAFG00000019589) | BAIAP3 | 5.615411704 | -4.978535361 | 0 |
| [ENSCAFG00000000024](http://www.ensembl.org/id/ENSCAFG00000000024) | CNDP1 | 5.595804245 | -7.640356862 | 0 |
| [ENSCAFG00000012042](http://www.ensembl.org/id/ENSCAFG00000012042) | USP2 | 5.59233869 | -1.737950677 | 0.003331836 |
| [ENSCAFG00000009032](http://www.ensembl.org/id/ENSCAFG00000009032) | PIP4P2 | 5.557972116 | -2.634291598 | 0.003214584 |
| [ENSCAFG00000010102](http://www.ensembl.org/id/ENSCAFG00000010102) | SEMA5A | 5.549551156 | -2.089300251 | 0.000567064 |
| [ENSCAFG00000031778](http://www.ensembl.org/id/ENSCAFG00000031778) | TRAPPC6A | 5.542438123 | -3.115845403 | 2.65273E-10 |
| [ENSCAFG00000002095](http://www.ensembl.org/id/ENSCAFG00000002095) | ADGRF4 | 5.516455443 | -7.474817855 | 0 |
| [ENSCAFG00000002847](http://www.ensembl.org/id/ENSCAFG00000002847) | EPB41L4B | 5.508897584 | -1.315137937 | 0.027336857 |
| [ENSCAFG00000004145](http://www.ensembl.org/id/ENSCAFG00000004145) | MLLT10 | 5.464148951 | -1.331885591 | 0.047410411 |
| [ENSCAFG00000006521](http://www.ensembl.org/id/ENSCAFG00000006521) | FRMD4B | 5.453781466 | -1.520145352 | 0.010244642 |
| [ENSCAFG00000010240](http://www.ensembl.org/id/ENSCAFG00000010240) | SLC22A18 | 5.439037365 | -6.232460287 | 0 |
| [ENSCAFG00000019577](http://www.ensembl.org/id/ENSCAFG00000019577) | HES2 | 5.438475344 | -4.894070004 | 2.20669E-05 |
| [ENSCAFG00000014518](http://www.ensembl.org/id/ENSCAFG00000014518) | MCU | 5.417144393 | -1.447838912 | 0.005745225 |
| [ENSCAFG00000030899](http://www.ensembl.org/id/ENSCAFG00000030899) | ZFP62 | 5.416505468 | -1.551986322 | 0.010127542 |
| [ENSCAFG00000031655](http://www.ensembl.org/id/ENSCAFG00000031655) | PRSS8 | 5.383872336 | -8.192263369 | 0 |
| [ENSCAFG00000004948](http://www.ensembl.org/id/ENSCAFG00000004948) | DLEC1 | 5.366780797 | -3.859813765 | 1.67156E-14 |
| [ENSCAFG00000029570](http://www.ensembl.org/id/ENSCAFG00000029570) | KANK3 | 5.32031839 | -1.708702292 | 0.014761023 |
| [ENSCAFG00000012925](http://www.ensembl.org/id/ENSCAFG00000012925) | PHKA2 | 5.293769004 | -1.890794634 | 0.000653961 |
| [ENSCAFG00000011835](http://www.ensembl.org/id/ENSCAFG00000011835) | IGSF9 | 5.263112481 | -2.801499598 | 8.64386E-07 |
| [ENSCAFG00000003025](http://www.ensembl.org/id/ENSCAFG00000003025) | RASSF6 | 5.246899294 | -4.952139226 | 1.71774E-10 |
| [ENSCAFG00000031264](http://www.ensembl.org/id/ENSCAFG00000031264) | CYYR1 | 5.241977201 | -2.334458593 | 0.006576704 |
| [ENSCAFG00000009817](http://www.ensembl.org/id/ENSCAFG00000009817) | KCNJ15 | 5.241472146 | -2.227085709 | 0.020196089 |
| [ENSCAFG00000019621](http://www.ensembl.org/id/ENSCAFG00000019621) | CCDC78 | 5.234623574 | -1.779255921 | 0.006360489 |
| [ENSCAFG00000018884](http://www.ensembl.org/id/ENSCAFG00000018884) | FGGY | 5.226286752 | -1.831461786 | 0.007827225 |
| [ENSCAFG00000005233](http://www.ensembl.org/id/ENSCAFG00000005233) | ASB13 | 5.220248905 | -1.967198658 | 0.000420722 |
| [ENSCAFG00000003745](http://www.ensembl.org/id/ENSCAFG00000003745) | EPHB6 | 5.215429925 | -1.714144065 | 0.004585047 |
| [ENSCAFG00000010482](http://www.ensembl.org/id/ENSCAFG00000010482) | SLC19A3 | 5.214792847 | -8.886948941 | 0 |
| [ENSCAFG00000012038](http://www.ensembl.org/id/ENSCAFG00000012038) | HHAT | 5.194531734 | -2.765577721 | 8.35288E-06 |
| [ENSCAFG00000014782](http://www.ensembl.org/id/ENSCAFG00000014782) | LPAR5 | 5.166817216 | -4.947001152 | 1.0419E-10 |
| [ENSCAFG00000029093](http://www.ensembl.org/id/ENSCAFG00000029093) | LYPD6 | 5.158558567 | -3.595202951 | 1.86188E-09 |
| [ENSCAFG00000005940](http://www.ensembl.org/id/ENSCAFG00000005940) | THSD1 | 5.156450719 | -2.343583234 | 1.42344E-06 |
| [ENSCAFG00000012193](http://www.ensembl.org/id/ENSCAFG00000012193) | RNF39 | 5.14620547 | -8.393614658 | 0 |
| [ENSCAFG00000008011](http://www.ensembl.org/id/ENSCAFG00000008011) | FAM83C | 5.145997469 | -4.689809499 | 3.22992E-14 |
| [ENSCAFG00000006389](http://www.ensembl.org/id/ENSCAFG00000006389) | SLC4A11 | 5.129194325 | -1.200701643 | 0.036924141 |
| [ENSCAFG00000001380](http://www.ensembl.org/id/ENSCAFG00000001380) | NTRK2 | 5.067206195 | -2.44553726 | 0.002519664 |
| [ENSCAFG00000003553](http://www.ensembl.org/id/ENSCAFG00000003553) | CADPS2 | 5.06320203 | -1.917731913 | 0.000804133 |
| [ENSCAFG00000009281](http://www.ensembl.org/id/ENSCAFG00000009281) | F2RL1 | 5.062157611 | -3.036592382 | 0.00111279 |
| [ENSCAFG00000012809](http://www.ensembl.org/id/ENSCAFG00000012809) | MPZL3 | 5.058970758 | -5.725487003 | 6.76949E-13 |
| [ENSCAFG00000008082](http://www.ensembl.org/id/ENSCAFG00000008082) | RASSF10 | 5.036672242 | -3.12703222 | 4.39118E-05 |
| [ENSCAFG00000005682](http://www.ensembl.org/id/ENSCAFG00000005682) | NGLY1 | 5.011867435 | -1.190954656 | 0.020118809 |

FDR, false discovery rate.

| **Table SV. Novel differentially expressed genes in canine oral melanoma.** | | | | | | | |
| --- | --- | --- | --- | --- | --- | --- | --- |
| Ensembl ID | | Chromosome | | Region | Max group mean | Log₂ fold change | FDR P-value |
| ENSCAFG00000035504 | | 1 | | 56200068..56201051 | 11.84891334 | 7.990528544 | 1.31565E-06 |
| ENSCAFG00000035871 | | 1 | | 56193607..56199619 | 5.375183724 | 7.858276269 | 0.01533349 |
| ENSCAFG00000023074 | | 1 | | complement(31097019..31098664) | 9.83181066 | 6.418872648 | 5.7903E-06 |
| ENSCAFG00000028453 | | 1 | | complement(102779497..102787260) | 7.091847892 | 5.113753787 | 0 |
| ENSCAFG00000030509 | | 1 | | 102955916..102960845 | 5.393395026 | 4.896990937 | 3.22992E-14 |
| ENSCAFG00000004730 | | 1 | | 111486389..111491034 | 111.3153548 | 4.789783319 | 7.84708E-13 |
| ENSCAFG00000030746 | | 1 | | complement(60586582..60598997) | 36.46314253 | 4.549518428 | 1.35577E-10 |
| ENSCAFG00000024425 | | 1 | | complement(102996666..103000872) | 6.161866656 | 3.389076645 | 2.94408E-05 |
| ENSCAFG00000002660 | | 1 | | 102913812..102921920 | 7.11058835 | 3.113049903 | 2.8645E-05 |
| ENSCAFG00000034249 | | 1 | | 103314846..103515439 | 41.54709691 | 2.691535635 | 2.44909E-09 |
| ENSCAFG00000030943 | | 1 | | complement(103516146..103517114) | 52.56424385 | 2.386679663 | 1.76591E-08 |
| ENSCAFG00000030942 | | 1 | | complement(103316243..103317211) | 52.34896342 | 2.36467677 | 1.76278E-08 |
| ENSCAFG00000000399 | | 1 | | 40635694..40637301 | 11.97511614 | 2.316532168 | 0.005801799 |
| ENSCAFG00000002392 | | 1 | | 99806398..99836073 | 11.44992494 | 1.415091641 | 0.005701833 |
| ENSCAFG00000002916 | | 1 | | 106048542..106049417 | 26.62715237 | 1.252462889 | 0.01181013 |
| ENSCAFG00000029151 | | 1 | | complement(109284673..109294917) | 60.47632563 | 1.218044508 | 0.034309245 |
| ENSCAFG00000032711 | | 1 | | 21236215..21286926 | 16.53203716 | -1.045037185 | 0.047474182 |
| ENSCAFG00000003594 | | 1 | | 106874406..106879062 | 43.24507089 | -1.1589629 | 0.019255889 |
| ENSCAFG00000005006 | | 1 | | complement(112575893..112615484) | 11.39903325 | -1.4548379 | 0.000762331 |
| ENSCAFG00000002083 | | 1 | | complement(93088299..93095024) | 45.65808914 | -1.926537472 | 0.000134483 |
| ENSCAFG00000024085 | | 1 | | complement(110326843..110327442) | 5.312288797 | -2.038063452 | 0.017015946 |
| ENSCAFG00000000026 | | 1 | | 5070925..5106749 | 52.16175897 | -2.152982301 | 4.44868E-06 |
| ENSCAFG00000024191 | | 1 | | 114322027..114324703 | 9.8497097 | -3.439525742 | 1.70002E-05 |
| ENSCAFG00000002237 | | 1 | | complement(98050515..98051104) | 38.26297143 | -3.651258288 | 0.022543198 |
| ENSCAFG00000024559 | | 1 | | 102306775..102307255 | 9.089560057 | -4.332120047 | 1.01157E-07 |
| ENSCAFG00000035737 | | 1 | | complement(55396268..55397690) | 5.477306783 | -4.584600635 | 8.63545E-09 |
| ENSCAFG00000028993 | | 1 | | complement(20901110..20907302) | 93.05584988 | -6.8596193 | 0 |
| ENSCAFG00000031912 | | 1 | | 117133127..117139309 | 58.0192795 | -7.403607581 | 0 |
| ENSCAFG00000031824 | | 1 | | 110342873..110347075 | 10.21649406 | -8.437873099 | 0 |
| ENSCAFG00000033364 | | 2 | | 30832303..30857290 | 9.855645082 | 4.17238559 | 7.67944E-06 |
| ENSCAFG00000005852 | | 2 | | complement(35791440..35792559) | 47.36075855 | 2.787247621 | 1.10304E-07 |
| ENSCAFG00000007705 | | 2 | | 54257083..54264620 | 31.23562827 | 2.030196141 | 0.000294183 |
| ENSCAFG00000012763 | | 2 | | complement(74139294..74149818) | 32.73403954 | 1.971982951 | 4.26304E-05 |
| ENSCAFG00000003894 | | 2 | | 17885581..18104374 | 24.03981851 | -5.165133229 | 0 |
| ENSCAFG00000024733 | | 2 | | complement(30411502..30412596) | 25.4897546 | -6.636421529 | 0 |
| ENSCAFG00000014627 | | 3 | | 60899870..60901258 | 261.1790712 | 8.044118048 | 1.11703E-08 |
| ENSCAFG00000010220 | | 3 | | complement(36852543..36977309) | 5.213834539 | 3.403507705 | 0.000210201 |
| ENSCAFG00000016695 | | 3 | | 91419841..91420920 | 21.17512727 | 2.204762499 | 0.020735339 |
| ENSCAFG00000013979 | | 3 | | 57451365..57464239 | 36.23293284 | 1.454838813 | 0.022144068 |
| ENSCAFG00000015372 | | 3 | | complement(65200069..65264049) | 13.40211576 | -1.528951959 | 0.003999528 |
| ENSCAFG00000029013 | | 3 | | complement(56881339..56887105) | 41.20800914 | -2.588867658 | 8.75518E-08 |
| ENSCAFG00000036387 | | 4 | | 64410491..64424126 | 5.085521306 | 3.208929883 | 0.00579167 |
| ENSCAFG00000028981 | | 4 | | 53099444..53131340 | 7.574157432 | 2.270852079 | 0.003657978 |
| ENSCAFG00000011612 | | 4 | | complement(6704962..6734245) | 45.74082332 | -1.052773667 | 0.038699369 |
| ENSCAFG00000018586 | | 4 | | 67701614..67703002 | 1576.83413 | -1.476555989 | 0.044341327 |
| ENSCAFG00000040164 | | 4 | | 60050479..60067067 | 19.53998725 | -2.447553939 | 2.27964E-06 |
| ENSCAFG00000023144 | | 4 | | 72461733..72480224 | 5.896396964 | -6.703027754 | 2.46133E-14 |
| ENSCAFG00000016093 | | 4 | | 34619615..34621515 | 209.8511735 | -7.279550499 | 8.66135E-15 |
| ENSCAFG00000019807 | | 5 | | complement(63682083..63690798) | 13.27244991 | 6.05652362 | 5.81285E-12 |
| ENSCAFG00000020220 | | 5 | | 77795316..77799904 | 19.75182685 | 4.987324055 | 1.28365E-06 |
| ENSCAFG00000036707 | | 5 | | 46823280..46824767 | 11.42749399 | 4.069413256 | 9.99231E-09 |
| ENSCAFG00000030394 | | 5 | | 28997435..28998309 | 9.203802558 | 3.908964196 | 0.031418318 |
| ENSCAFG00000023925 | | 5 | | complement(21180081..21180997) | 12.6187247 | 3.203036116 | 1.03401E-05 |
| ENSCAFG00000023902 | | 5 | | complement(63694296..63695247) | 6.580662588 | 2.890178889 | 0.003875369 |
| ENSCAFG00000032273 | | 5 | | 15791983..15808500 | 83.67336552 | 2.007087472 | 0.004897718 |
| ENSCAFG00000020333 | | 5 | | 81561175..81563512 | 18.2536878 | 1.48077867 | 0.04592475 |
| ENSCAFG00000018611 | | 5 | | complement(45056215..45120680) | 8.108729222 | -1.280853437 | 0.024794219 |
| ENSCAFG00000020027 | | 5 | | 71965500..71966671 | 24.99885637 | -1.654232768 | 0.001019657 |
| ENSCAFG00000017001 | | 5 | | complement(32975858..32978224) | 5.032567544 | -1.706048205 | 0.017349885 |
| ENSCAFG00000031282 | | 5 | | complement(31749331..31750311) | 6.241250231 | -2.300600643 | 0.001457624 |
| ENSCAFG00000017933 | | 5 | | complement(39102282..39167758) | 8.222279668 | -3.117410396 | 1.3081E-09 |
| ENSCAFG00000016475 | | 6 | | complement(15276310..15278784) | 6.207350609 | 5.555615085 | 9.46773E-09 |
| ENSCAFG00000014493 | | 6 | | complement(9272713..9288871) | 9.411892563 | 5.450061274 | 1.28977E-10 |
| ENSCAFG00000019365 | | 6 | | complement(38536069..38542578) | 5.720406352 | 2.007330901 | 0.000161649 |
| ENSCAFG00000018181 | | 6 | | complement(27738221..27793516) | 81.18196135 | 1.743825912 | 0.002028509 |
| ENSCAFG00000019210 | | 6 | | 36918507..36927475 | 36.15229119 | 1.717054924 | 0.001184475 |
| ENSCAFG00000030466 | | 6 | | 31249401..31260448 | 60.39843434 | 1.593961838 | 0.015172906 |
| ENSCAFG00000011354 | | 6 | | 5583492..5597879 | 13.31082009 | 1.371791741 | 0.02691254 |
| ENSCAFG00000032470 | | 6 | | complement(61123254..61298605) | 9.667412844 | 1.352943984 | 0.022931305 |
| ENSCAFG00000020150 | | 6 | | complement(56203396..56214876) | 179.6286941 | -1.452402091 | 0.02867968 |
| ENSCAFG00000019812 | | 6 | | complement(42202578..42207944) | 360.4657394 | -2.977400921 | 4.13027E-06 |
| ENSCAFG00000019353 | | 6 | | 38339007..38399808 | 17.82418593 | -8.62334277 | 0 |
| ENSCAFG00000013653 | | 6 | | 7662680..7666484 | 60.03999718 | -9.608857975 | 0 |
| ENSCAFG00000023230 | | 6 | | complement(39732959..39832346) | 110.0280698 | -9.755172915 | 0 |
| ENSCAFG00000020241 | | 6 | | complement(61510741..61530994) | 183.9605566 | -9.904211295 | 0 |
| ENSCAFG00000030657 | | 7 | | 2303258..2306766 | 6.094502238 | 6.126157191 | 5.0791E-13 |
| ENSCAFG00000030095 | | 7 | | 8334873..8336943 | 31.17087967 | 5.292306471 | 1.15748E-10 |
| ENSCAFG00000030495 | | 7 | | complement(1298936..1344857) | 6.406529733 | 4.38151355 | 7.06626E-10 |
| ENSCAFG00000011151 | | 7 | | 2716971..2719675 | 5.696123664 | 2.282051734 | 9.1904E-06 |
| ENSCAFG00000031490 | | 7 | | complement(80964807..80965979) | 71.5800605 | 2.167537672 | 0.049096317 |
| ENSCAFG00000030770 | | 7 | | complement(40845072..40857017) | 18.3538727 | 2.101136582 | 1.93306E-05 |
| ENSCAFG00000031543 | | 7 | | 40811833..40825759 | 5.121222149 | 1.477593476 | 0.016524158 |
| ENSCAFG00000028771 | | 7 | | 1705821..1724455 | 9.071423725 | 1.418545759 | 0.008394907 |
| ENSCAFG00000010830 | | 7 | | 2069559..2088398 | 9.944699234 | 1.288792253 | 0.030262585 |
| ENSCAFG00000024483 | | 7 | | 73518410..73520450 | 5.499134371 | -1.469320418 | 0.026980851 |
| ENSCAFG00000014066 | | 7 | | 21638999..21667291 | 5.351742552 | -1.638390844 | 0.005260481 |
| ENSCAFG00000031930 | | 7 | | complement(59858463..59859494) | 127.3999434 | -1.731021626 | 0.000118146 |
| ENSCAFG00000017072 | | 7 | | complement(42409061..42417791) | 11.00622815 | -1.964315844 | 0.000573783 |
| ENSCAFG00000016844 | | 7 | | 41626551..41629352 | 8.40582253 | -2.29490768 | 0.001070859 |
| ENSCAFG00000024748 | | 7 | | 6360964..6389118 | 12.05486525 | -2.34597306 | 0.000391652 |
| ENSCAFG00000019080 | | 7 | | 80484067..80493709 | 11.71493088 | -4.997440461 | 0 |
| ENSCAFG00000011523 | | 7 | | complement(6161904..6163373) | 21.3442383 | -6.257916114 | 0 |
| ENSCAFG00000029470 | | 7 | | complement(43565980..43569673) | 4441.530653 | -6.317147271 | 8.66135E-15 |
| ENSCAFG00000031147 | | 7 | | 1530334..1576172 | 132.7355295 | -9.052401579 | 0 |
| ENSCAFG00000031078 | | 8 | | complement(73235327..73235619) | 22.29379605 | 9.615694414 | 0.002058616 |
| ENSCAFG00000029996 | | 8 | | complement(73685663..73751650) | 184.8595736 | 7.343536104 | 0 |
| ENSCAFG00000030993 | | 8 | | complement(72989240..73267073) | 26.2898926 | 7.146712593 | 1.64319E-08 |
| ENSCAFG00000030258 | | 8 | | complement(72906321..73387840) | 585.378127 | 7.09342349 | 0 |
| ENSCAFG00000030900 | | 8 | | complement(74052039..74052248) | 60.2735056 | 7.063696675 | 9.06275E-09 |
| ENSCAFG00000023944 | | 8 | | complement(73055853..73056377) | 8.551984464 | 6.691074533 | 0.000477606 |
| ENSCAFG00000028509 | | 8 | | complement(73477706..73639802) | 195.5497797 | 6.6020349 | 8.66135E-15 |
| ENSCAFG00000030001 | | 8 | | complement(73886033..73886621) | 5.544994499 | 6.499263655 | 0.000605242 |
| ENSCAFG00000024111 | | 8 | | complement(74067840..74068127) | 36.42339286 | 6.496687056 | 1.49372E-10 |
| ENSCAFG00000030894 | | 8 | | complement(73837570..73968200) | 7.883838361 | 6.234718094 | 9.40513E-06 |
| ENSCAFG00000030284 | | 8 | | complement(73654962..73655629) | 6.602370696 | 6.215628147 | 5.08115E-05 |
| ENSCAFG00000035669 | | 8 | | complement(42638614..42642454) | 9.852235555 | 6.048882373 | 2.52329E-13 |
| ENSCAFG00000032358 | | 8 | | complement(72847361..72852219) | 268.1075815 | 5.707864264 | 5.27351E-11 |
| ENSCAFG00000014670 | | 8 | | complement(28240131..28275282) | 54.39790355 | 4.177243121 | 4.76952E-14 |
| ENSCAFG00000024864 | | 8 | | 1962944..1973444 | 29.84926746 | 4.001831338 | 5.84382E-11 |
| ENSCAFG00000013905 | | 8 | | complement(5138892..5140109) | 33.00828872 | -1.587328465 | 0.002468675 |
| ENSCAFG00000013883 | | 8 | | 17390972..17482474 | 10.89481935 | -1.70571124 | 3.69751E-05 |
| ENSCAFG00000030662 | | 8 | | complement(72423345..72430357) | 56.02102778 | -2.881399708 | 1.53398E-07 |
| ENSCAFG00000030682 | | 8 | | complement(72419958..72420773) | 44.28513998 | -3.493394761 | 2.31026E-11 |
| ENSCAFG00000030632 | | 8 | | complement(38967334..38968455) | 69.62308674 | -5.57089491 | 0 |
| ENSCAFG00000004595 | | 9 | | 5700922..5714204 | 5.316570014 | 9.669021308 | 0.000930388 |
| ENSCAFG00000031869 | | 9 | | 37763225..37766818 | 95.18178455 | 6.076742279 | 0 |
| ENSCAFG00000024792 | | 9 | | 5906878..5913176 | 11.45011491 | 4.492638067 | 1.52219E-13 |
| ENSCAFG00000024944 | | 9 | | 5858852..5862730 | 13.08670208 | 3.884699418 | 2.08442E-12 |
| ENSCAFG00000029405 | | 9 | | 41523246..41523941 | 18.14755016 | 3.641717992 | 5.57726E-12 |
| ENSCAFG00000020060 | | 9 | | 55100533..55100964 | 14.74740628 | 3.366275782 | 7.16723E-06 |
| ENSCAFG00000005705 | | 9 | | 903489..922829 | 8.84341831 | 2.993692916 | 7.379E-05 |
| ENSCAFG00000035696 | | 9 | | complement(2451990..2460555) | 13.56535106 | 2.432402494 | 7.52262E-06 |
| ENSCAFG00000031537 | | 9 | | complement(48564876..48567038) | 18.53592654 | 2.005974341 | 0.001801798 |
| ENSCAFG00000017532 | | 9 | | complement(33136702..33161125) | 13.5607973 | 1.730496006 | 0.001705415 |
| ENSCAFG00000019510 | | 9 | | 48528903..48531662 | 31.15019746 | 1.689203167 | 0.005314997 |
| ENSCAFG00000011598 | | 9 | | complement(12547166..12554684) | 76.3149409 | 1.314715694 | 0.039670467 |
| ENSCAFG00000004905 | | 9 | | complement(4837366..4855184) | 51.40954779 | -1.736000438 | 0.012913181 |
| ENSCAFG00000014799 | | 9 | | complement(20250903..20252436) | 40.18589901 | -1.831410924 | 0.008093531 |
| ENSCAFG00000015156 | | 9 | | 10282539..10283222 | 14.58251434 | -1.925719996 | 0.006109203 |
| ENSCAFG00000029346 | | 9 | | complement(4824665..4834819) | 68.10763129 | -2.067691372 | 0.001392657 |
| ENSCAFG00000032099 | | 9 | | 10350536..10371713 | 26.07743078 | -2.284337191 | 1.33048E-06 |
| ENSCAFG00000012998 | | 9 | | 11497182..11516058 | 12.65787595 | -2.328934235 | 0.001104143 |
| ENSCAFG00000013770 | | 9 | | 18188914..18198724 | 21.07570069 | -2.737397316 | 4.45846E-12 |
| ENSCAFG00000029478 | | 9 | | 10287952..10304725 | 28.43608154 | -3.755747176 | 4.57446E-09 |
| ENSCAFG00000028642 | | 9 | | 10313109..10328751 | 10.93521375 | -4.307119162 | 3.35055E-07 |
| ENSCAFG00000032290 | | 9 | | complement(22392083..22399655) | 29.05642424 | -6.60423219 | 0 |
| ENSCAFG00000032259 | | 9 | | complement(37617977..37622560) | 298.0600534 | -8.627843471 | 0 |
| ENSCAFG00000030805 | | 9 | | 21688036..21688332 | 226.851523 | -13.83146445 | 0 |
| ENSCAFG00000030326 | | 10 | | complement(1352227..1353858) | 10.51433181 | 6.950486503 | 6.28947E-14 |
| ENSCAFG00000000072 | | 10 | | 215773..222586 | 22.4997321 | 2.875203787 | 6.27621E-09 |
| ENSCAFG00000001689 | | 10 | | 28132180..28138366 | 6.405037111 | 2.697530043 | 0.000203552 |
| ENSCAFG00000000415 | | 10 | | 10805359..10818433 | 117.5359313 | 2.572415781 | 0.002637691 |
| ENSCAFG00000030366 | | 10 | | 16844002..16849073 | 11.36498223 | -1.407651586 | 0.000961291 |
| ENSCAFG00000023004 | | 10 | | complement(16619447..16632922) | 8.312458864 | -1.917253801 | 0.003657978 |
| ENSCAFG00000030654 | | 11 | | 18620828..18625099 | 9.454107243 | 5.012443858 | 6.3712E-09 |
| ENSCAFG00000001675 | | 11 | | complement(41223261..41246135) | 26.12739629 | 3.19227453 | 0.017608957 |
| ENSCAFG00000000497 | | 11 | | complement(922752..957886) | 6.090285607 | 2.71770156 | 0.007294829 |
| ENSCAFG00000030323 | | 11 | | 12281313..12284141 | 5.490964011 | -1.776399549 | 0.001371287 |
| ENSCAFG00000030529 | | 11 | | 66211298..66212278 | 33.47633953 | -2.783080879 | 3.52938E-07 |
| ENSCAFG00000025172 | | 11 | | complement(51375595..51375790) | 13.7708214 | -2.976886011 | 0.049304964 |
| ENSCAFG00000003564 | | 12 | | complement(59069085..59070296) | 28.32039123 | 7.018257499 | 8.97162E-07 |
| ENSCAFG00000000686 | | 12 | | 1363672..1406213 | 32.97688229 | 3.377376433 | 1.64505E-08 |
| ENSCAFG00000023691 | | 12 | | 1085228..1086049 | 9.531165787 | 3.165363812 | 0.003127103 |
| ENSCAFG00000000492 | | 12 | | complement(1013178..1021690) | 70.16028245 | 2.851333741 | 6.56334E-07 |
| ENSCAFG00000002008 | | 12 | | 13786142..13843688 | 10.77399764 | 2.171941847 | 4.63379E-06 |
| ENSCAFG00000030835 | | 12 | | complement(6508137..6524831) | 7.263951396 | 2.063464127 | 0.01402659 |
| ENSCAFG00000000447 | | 12 | | complement(529738..530220) | 55.03136949 | 1.961293592 | 0.00279692 |
| ENSCAFG00000023724 | | 12 | | complement(4082337..4083554) | 77.94689605 | 1.278705939 | 0.011633011 |
| ENSCAFG00000002230 | | 12 | | complement(20347712..20365071) | 10.35125429 | -4.282669952 | 2.1475E-08 |
| ENSCAFG00000024271 | | 12 | | complement(20404346..20414545) | 100.093464 | -5.169063803 | 0 |
| ENSCAFG00000033670 | | 12 | | 15733719..15739752 | 5.114319465 | -8.57494298 | 0 |
| ENSCAFG00000000613 | | 12 | | complement(1190367..1191736) | 5.405141424 | -8.885612115 | 2.06869E-06 |
| ENSCAFG00000040421 | | 12 | | 10705777..10734862 | 20.76619667 | -9.340422965 | 0 |
| ENSCAFG00000031682 | | 12 | | complement(20320070..20334201) | 12.54351205 | -9.53393842 | 1.67156E-14 |
| ENSCAFG00000000471 | | 12 | | 742518..744376 | 502.6434471 | -14.74161241 | 0 |
| ENSCAFG00000028960 | | 13 | | 12340872..12341426 | 86.42977166 | 10.6431215 | 1.13093E-08 |
| ENSCAFG00000025016 | | 13 | | 62514259..62515981 | 85.47879686 | 9.152385829 | 8.84452E-11 |
| ENSCAFG00000036767 | | 13 | | 48435621..48517786 | 9.800816163 | 6.400432043 | 2.82928E-05 |
| ENSCAFG00000000798 | | 13 | | complement(13580884..13581342) | 5.037333716 | 5.469184203 | 0.024137533 |
| ENSCAFG00000037056 | | 13 | | 48448661..48491127 | 5.668552626 | 3.34473999 | 0.00572879 |
| ENSCAFG00000030437 | | 13 | | complement(37946703..37946996) | 9.257080107 | 2.481089364 | 0.029366224 |
| ENSCAFG00000035602 | | 13 | | 25410434..25431934 | 13.93981873 | 1.87956864 | 0.00017421 |
| ENSCAFG00000032430 | | 13 | | complement(58489569..58494296) | 121.6158135 | -9.458522801 | 0 |
| ENSCAFG00000030958 | | 14 | | 25826059..25826837 | 237.833792 | 9.555686481 | 1.52219E-13 |
| ENSCAFG00000002440 | | 14 | | 31644148..31645491 | 23.26639053 | 2.407251465 | 9.21693E-07 |
| ENSCAFG00000002448 | | 14 | | 31743790..31793714 | 31.40147285 | 1.631262334 | 0.018899332 |
| ENSCAFG00000033183 | | 14 | | 36556065..36560107 | 5.367650894 | -2.002234974 | 0.001280894 |
| ENSCAFG00000036275 | | 14 | | complement(22834190..22848608) | 7.722634884 | -2.031970763 | 0.001984224 |
| ENSCAFG00000008273 | | 15 | | complement(51161768..51162322) | 59.21192407 | 7.311770646 | 1.59123E-08 |
| ENSCAFG00000003087 | | 15 | | complement(3327526..3359170) | 8.033511329 | 2.1511169 | 0.008591691 |
| ENSCAFG00000004887 | | 15 | | complement(16323541..16346952) | 6.911189519 | 1.964593226 | 0.003811336 |
| ENSCAFG00000035346 | | 15 | | 19129843..19133316 | 31.53484296 | 1.876929663 | 0.009888794 |
| ENSCAFG00000028627 | | 15 | | 51086975..51106532 | 5.552740778 | 1.772338319 | 0.009847107 |
| ENSCAFG00000005575 | | 16 | | 23469313..23495388 | 57.64510766 | 3.647908552 | 1.00655E-13 |
| ENSCAFG00000037515 | | 16 | | complement(1018538..1028779) | 107.6213567 | 3.125051818 | 6.6514E-07 |
| ENSCAFG00000004543 | | 16 | | 14642056..14848522 | 6.816617907 | 2.642941407 | 0.00192538 |
| ENSCAFG00000006478 | | 16 | | 33633704..33680616 | 32.35042328 | -1.893927576 | 4.70684E-05 |
| ENSCAFG00000003530 | | 16 | | 6109858..6132614 | 6.866790759 | -2.841989642 | 6.36442E-09 |
| ENSCAFG00000003221 | | 16 | | 12887021..12918644 | 17.00845423 | -8.852779959 | 0 |
| ENSCAFG00000023369 | | 17 | | 37534371..37534898 | 12.43810628 | 9.025580649 | 0.004531852 |
| ENSCAFG00000015584 | | 17 | | complement(37818525..37819291) | 25.34159938 | 7.620806798 | 7.28711E-08 |
| ENSCAFG00000031753 | | 17 | | complement(37702387..37754788) | 111.6859735 | 6.812037186 | 0 |
| ENSCAFG00000029676 | | 17 | | complement(37765220..37765657) | 29.49818068 | 6.608920443 | 7.56579E-08 |
| ENSCAFG00000011504 | | 17 | | 59092864..59101871 | 21.58928444 | 6.435067104 | 0 |
| ENSCAFG00000032691 | | 17 | | complement(37707368..37829005) | 27.74508545 | 5.464913358 | 4.41417E-07 |
| ENSCAFG00000013697 | | 17 | | complement(63918980..63924265) | 5.681752854 | 5.172695622 | 1.78488E-09 |
| ENSCAFG00000008716 | | 17 | | complement(48883932..48896897) | 22.37250093 | 3.67559889 | 8.66135E-15 |
| ENSCAFG00000004676 | | 17 | | complement(21093357..21107694) | 7.881443769 | 2.992185762 | 2.60136E-05 |
| ENSCAFG00000032813 | | 17 | | 15438116..15441282 | 64.87938002 | 2.510340205 | 3.77766E-05 |
| ENSCAFG00000033956 | | 17 | | 5956896..5958887 | 26.30909345 | 2.123570876 | 4.29007E-05 |
| ENSCAFG00000028873 | | 17 | | complement(4469593..4476883) | 8.120066373 | 2.041988643 | 0.014279887 |
| ENSCAFG00000039320 | | 17 | | 834484..845804 | 22.53598103 | 2.011665176 | 0.000546326 |
| ENSCAFG00000003477 | | 17 | | complement(7650112..7674204) | 93.43666748 | 1.841033118 | 0.002423496 |
| ENSCAFG00000009798 | | 17 | | complement(53973029..53995788) | 15.86203471 | 1.390682937 | 0.007833443 |
| ENSCAFG00000023111 | | 17 | | complement(60984425..60987378) | 354.3255735 | -1.423676 | 0.00159774 |
| ENSCAFG00000031309 | | 17 | | 42181237..42182361 | 5.674618292 | -3.981567365 | 1.59672E-06 |
| ENSCAFG00000007239 | | 17 | | complement(36935358..36935594) | 29.116383 | -4.040764465 | 1.96716E-05 |
| ENSCAFG00000012022 | | 17 | | 59698670..59701290 | 254.5146118 | -4.4470522 | 8.66135E-15 |
| ENSCAFG00000031502 | | 17 | | 61992774..61995722 | 16.70667691 | -6.186774316 | 2.46133E-14 |
| ENSCAFG00000033334 | | 17 | | 61751263..61753557 | 9.289585898 | -10.98779122 | 1.67709E-09 |
| ENSCAFG00000029234 | | 17 | | 61572866..61575666 | 13.6321999 | -11.39229998 | 0 |
| ENSCAFG00000023728 | | 17 | | 61715810..61716667 | 6965.176802 | -13.0728668 | 0 |
| ENSCAFG00000030793 | | 18 | | complement(25493945..25495643) | 6.906168635 | 6.89767843 | 1.47317E-07 |
| ENSCAFG00000010913 | | 18 | | 49580389..49591084 | 21.30361322 | 2.195604751 | 3.61531E-06 |
| ENSCAFG00000015053 | | 18 | | complement(53180772..53185360) | 7.572474683 | 1.810140892 | 0.004391949 |
| ENSCAFG00000016171 | | 18 | | complement(55014275..55038184) | 6.733095434 | 1.501024767 | 0.030352477 |
| ENSCAFG00000015082 | | 18 | | 53367896..53398115 | 8.752443586 | 1.490000824 | 0.045476794 |
| ENSCAFG00000040425 | | 18 | | complement(17721173..17744075) | 7.649864509 | -1.325652033 | 0.01134781 |
| ENSCAFG00000010698 | | 18 | | 48481201..48489138 | 6.782613348 | -1.421643737 | 0.031085516 |
| ENSCAFG00000032173 | | 18 | | 100257..120039 | 161.6327199 | -1.635174338 | 0.012537178 |
| ENSCAFG00000038408 | | 18 | | complement(51658592..51769382) | 25.56853282 | -1.839577047 | 0.006360489 |
| ENSCAFG00000029403 | | 18 | | 25763734..25776766 | 71.23147697 | -1.857241406 | 0.001143626 |
| ENSCAFG00000037290 | | 19 | | complement(28415919..28418989) | 6.609443672 | 4.039669048 | 0.002519664 |
| ENSCAFG00000005717 | | 19 | | complement(52569956..52898204) | 8.98263234 | 1.829891314 | 0.02855777 |
| ENSCAFG00000037999 | | 19 | | 20618298..20622315 | 6.75690743 | -8.773042538 | 0 |
| ENSCAFG00000023396 | | 20 | | 42046398..42051815 | 9.624830908 | 7.377000459 | 2.54697E-11 |
| ENSCAFG00000013645 | | 20 | | 42012713..42025759 | 14.58263198 | 5.116795935 | 4.22058E-06 |
| ENSCAFG00000012879 | | 20 | | complement(40740084..40740614) | 31.50231251 | 4.689566062 | 0.000262534 |
| ENSCAFG00000013805 | | 20 | | 42424809..42425876 | 18.11678566 | 4.241772322 | 1.46624E-10 |
| ENSCAFG00000016245 | | 20 | | 47844170..47861907 | 13.5365478 | 3.895977936 | 1.80398E-10 |
| ENSCAFG00000029989 | | 20 | | complement(44737498..44738415) | 62.67518044 | 1.592139584 | 0.002547595 |
| ENSCAFG00000006577 | | 20 | | complement(22888197..22890353) | 40.15492665 | 1.28581714 | 0.02463222 |
| ENSCAFG00000017892 | | 20 | | 50855371..50928022 | 23.26026818 | 1.216476764 | 0.034039575 |
| ENSCAFG00000014978 | | 20 | | complement(44825948..44836136) | 44.7787123 | -1.867886567 | 0.000179305 |
| ENSCAFG00000031302 | | 20 | | complement(57847577..57848860) | 38.82323666 | -3.440591213 | 2.29073E-08 |
| ENSCAFG00000031469 | | 20 | | 56209815..56233817 | 6.183341835 | -3.554588434 | 1.04883E-12 |
| ENSCAFG00000015206 | | 21 | | 40680858..40685074 | 476.1739252 | 7.802839134 | 0 |
| ENSCAFG00000029553 | | 21 | | complement(40627471..40634004) | 235.7557557 | 7.375427473 | 0 |
| ENSCAFG00000040603 | | 21 | | complement(30313614..30460787) | 5.899703212 | 2.139710831 | 0.031223123 |
| ENSCAFG00000004384 | | 21 | | 11659292..11692734 | 137.7959713 | 2.085913471 | 0.000124446 |
| ENSCAFG00000029218 | | 21 | | 39928438..39950067 | 8.301400317 | 1.154016603 | 0.029484632 |
| ENSCAFG00000008336 | | 21 | | 7927729..7928775 | 42.02752093 | -1.492066625 | 0.016314754 |
| ENSCAFG00000004857 | | 21 | | 20889332..20889924 | 193.3028437 | -3.431779804 | 0.032584178 |
| ENSCAFG00000040404 | | 21 | | complement(47831963..47848876) | 7.232160967 | -7.903831499 | 4.07182E-08 |
| ENSCAFG00000030587 | | 22 | | complement(9202851..9205642) | 33.93408748 | 3.311947415 | 3.03031E-05 |
| ENSCAFG00000023746 | | 22 | | 16343283..16444635 | 6.424778002 | -1.202632832 | 0.037449692 |
| ENSCAFG00000004602 | | 22 | | complement(6994523..7002184) | 16.16257142 | -1.468739242 | 0.005107483 |
| ENSCAFG00000006540 | | 23 | | 30658214..30710218 | 43.98782211 | 2.815493009 | 1.50359E-05 |
| ENSCAFG00000031320 | | 23 | | complement(20128873..20263372) | 13.37876644 | -1.207485628 | 0.023938064 |
| ENSCAFG00000031852 | | 23 | | complement(11891657..11896822) | 33.98901851 | -1.648026364 | 0.001182034 |
| ENSCAFG00000008181 | | 23 | | complement(41640318..41669202) | 10.37684255 | -3.032187454 | 3.82046E-07 |
| ENSCAFG00000040319 | | 23 | | complement(47497756..47502322) | 6.340588935 | -3.213854659 | 7.35688E-12 |
| ENSCAFG00000039338 | | 23 | | complement(37714365..37727696) | 14.47409395 | -3.231006457 | 8.89525E-10 |
| ENSCAFG00000028903 | | 23 | | complement(47248408..47249497) | 5.042668697 | -4.802915121 | 1.26197E-05 |
| ENSCAFG00000036793 | | 23 | | 47225578..47253275 | 22.84208458 | -5.348127779 | 9.46275E-08 |
| ENSCAFG00000012157 | | 24 | | 43590339..43591082 | 27.75430569 | 6.023733686 | 0.001071397 |
| ENSCAFG00000007435 | | 24 | | complement(22896232..22897059) | 11.52251298 | 2.198838745 | 0.00188214 |
| ENSCAFG00000025524 | | 24 | | complement(19097392..19135461) | 61.67024069 | 2.065881024 | 2.0265E-05 |
| ENSCAFG00000009480 | | 24 | | 32078624..32099475 | 7.485922906 | 1.987419966 | 0.039159775 |
| ENSCAFG00000012643 | | 24 | | complement(46315559..46318220) | 23.97548078 | -1.428645618 | 0.004722781 |
| ENSCAFG00000008000 | | 24 | | complement(24261891..24265995) | 217.8956333 | -2.140894775 | 1.36735E-06 |
| ENSCAFG00000007115 | | 25 | | 14650639..14728607 | 6.367529963 | 1.887623723 | 0.003275596 |
| ENSCAFG00000008369 | | 25 | | 29751376..29781041 | 6.6227376 | 1.573426641 | 0.019255889 |
| ENSCAFG00000008104 | | 25 | | 27219301..27220227 | 13.03920661 | -3.687323509 | 1.25089E-07 |
| ENSCAFG00000010555 | | 25 | | 41831340..41832608 | 11.53777457 | -3.939533063 | 0.000211828 |
| ENSCAFG00000012788 | | 25 | | complement(50982758..50989118) | 5.111924429 | -9.542291866 | 4.13199E-12 |
| ENSCAFG00000031160 | | 25 | | complement(40364426..40405072) | 6.145862568 | -10.29637654 | 0 |
| ENSCAFG00000030158 | | 25 | | complement(50731087..50738333) | 21.35338743 | -11.67289691 | 0 |
| ENSCAFG00000023843 | | 26 | | complement(25233817..25234405) | 32.84709867 | 10.89789493 | 0.00034417 |
| ENSCAFG00000031637 | | 26 | | 26019679..26020315 | 160.0894375 | 10.16536199 | 2.46133E-14 |
| ENSCAFG00000032706 | | 26 | | 27024437..27025237 | 46.76126804 | 10.09829385 | 2.20328E-09 |
| ENSCAFG00000015176 | | 26 | | 27354222..27354548 | 15.83001965 | 9.31746543 | 0.00226455 |
| ENSCAFG00000031196 | | 26 | | 27303190..27304407 | 117.3001854 | 9.280131794 | 7.81035E-14 |
| ENSCAFG00000032328 | | 26 | | 27265388..27266208 | 34.33406501 | 9.151918636 | 8.40715E-08 |
| ENSCAFG00000029323 | | 26 | | 25156918..25157508 | 60.91962248 | 8.5101226 | 6.83077E-11 |
| ENSCAFG00000030555 | | 26 | | complement(25181868..25182506) | 70.23522946 | 8.373409718 | 2.46133E-14 |
| ENSCAFG00000032325 | | 26 | | 26174577..26175213 | 166.3718066 | 8.158170961 | 2.63822E-12 |
| ENSCAFG00000024720 | | 26 | | complement(25285319..25455562) | 165.9629161 | 7.838425146 | 0 |
| ENSCAFG00000031733 | | 26 | | 27565645..27599179 | 15.87122419 | 7.759508157 | 9.13843E-08 |
| ENSCAFG00000029236 | | 26 | | 26760401..26929349 | 45.97768312 | 7.625813359 | 7.06014E-14 |
| ENSCAFG00000032078 | | 26 | | 25975987..25976748 | 87.1774074 | 7.621481734 | 0 |
| ENSCAFG00000013622 | | 26 | | 27164804..27165446 | 32.90772055 | 7.517514898 | 7.24938E-07 |
| ENSCAFG00000031786 | | 26 | | 27605067..27616302 | 497.5464419 | 7.498002132 | 0 |
| ENSCAFG00000031273 | | 26 | | 27364199..27499791 | 40.32579269 | 7.398822446 | 6.86836E-12 |
| ENSCAFG00000031403 | | 26 | | 25672170..25672852 | 76.27499128 | 7.25233011 | 9.19387E-12 |
| ENSCAFG00000031806 | | 26 | | 27626671..27632004 | 645.9357198 | 7.033040174 | 0 |
| ENSCAFG00000030935 | | 26 | | 25653824..25654486 | 21.92585697 | 7.031104073 | 4.09152E-10 |
| ENSCAFG00000031653 | | 26 | | 26868870..26869707 | 50.61092742 | 6.987647103 | 0 |
| ENSCAFG00000029493 | | 26 | | 27620223..27620543 | 264.9025566 | 6.875187743 | 1.58428E-08 |
| ENSCAFG00000028850 | | 26 | | 27391907..27559146 | 20.40777678 | 6.801055021 | 4.00728E-09 |
| ENSCAFG00000032057 | | 26 | | 27624214..27624534 | 1030.146501 | 6.625580707 | 3.22992E-14 |
| ENSCAFG00000032249 | | 26 | | 26325879..26379152 | 14.74547498 | 6.507410735 | 1.41156E-07 |
| ENSCAFG00000014432 | | 26 | | 27400243..27458097 | 37.83913442 | 6.172905188 | 3.00835E-09 |
| ENSCAFG00000023160 | | 26 | | 26570289..26615302 | 9.705257788 | 5.54375583 | 0.000141606 |
| ENSCAFG00000030602 | | 26 | | 25949218..25949861 | 6.156205964 | 5.524318344 | 0.000112626 |
| ENSCAFG00000032195 | | 26 | | complement(25308419..25308933) | 66.24015321 | 5.370346958 | 1.23187E-08 |
| ENSCAFG00000029467 | | 26 | | 26151663..26326576 | 6.275652456 | 5.285486988 | 4.81461E-05 |
| ENSCAFG00000028847 | | 26 | | 27477837..27547347 | 7.350395084 | 5.15195901 | 9.28871E-05 |
| ENSCAFG00000031415 | | 26 | | 25050205..25050897 | 151.0779026 | 5.126069552 | 5.94329E-07 |
| ENSCAFG00000028814 | | 26 | | complement(28561578..28567376) | 5.475298382 | 3.744628212 | 5.5012E-10 |
| ENSCAFG00000014043 | | 26 | | complement(28573245..28580865) | 9.315090207 | 3.520563144 | 9.23561E-07 |
| ENSCAFG00000006533 | | 26 | | complement(1010354..1019298) | 9.378420819 | 3.287958478 | 2.28852E-07 |
| ENSCAFG00000015433 | | 26 | | 31062296..31062973 | 55.64363616 | -1.606026549 | 0.001567768 |
| ENSCAFG00000014154 | | 26 | | complement(29032190..29056357) | 11.23365129 | -3.678529071 | 0 |
| ENSCAFG00000034742 | | 27 | | complement(39756088..39767669) | 6.366787228 | 7.737310383 | 0.000480128 |
| ENSCAFG00000036159 | | 27 | | 736599..738391 | 59.58527103 | 5.961706723 | 4.8607E-05 |
| ENSCAFG00000031299 | | 27 | | complement(5411374..5412162) | 133.7284285 | 3.70632318 | 4.76952E-14 |
| ENSCAFG00000016263 | | 27 | | 5411155..5457509 | 229.9063389 | 2.632377517 | 9.01311E-08 |
| ENSCAFG00000016252 | | 27 | | 45764771..45815497 | 7.216717465 | 2.43881255 | 0.004374991 |
| ENSCAFG00000031081 | | 27 | | 21464058..21467555 | 12.15543778 | 1.452481677 | 0.023456803 |
| ENSCAFG00000014684 | | 27 | | complement(38268795..38270050) | 216.6154061 | 1.196683782 | 0.027762038 |
| ENSCAFG00000008380 | | 27 | | complement(4735245..4738844) | 18.09306778 | -1.708711291 | 0.002133287 |
| ENSCAFG00000011417 | | 27 | | 21855205..21856473 | 108.3009024 | -3.178978325 | 0.002201465 |
| ENSCAFG00000007209 | | 27 | | 2609661..2614541 | 143.4421203 | -6.043971873 | 4.26733E-07 |
| ENSCAFG00000008119 | | 29 | | complement(22337560..22409660) | 9.083695237 | 1.445388418 | 0.047246834 |
| ENSCAFG00000030471 | | 30 | | complement(27641754..27642680) | 29.01707307 | 4.061389152 | 7.2252E-06 |
| ENSCAFG00000017107 | | 30 | | 29242218..29263909 | 43.70962071 | 2.731781862 | 4.3467E-08 |
| ENSCAFG00000016966 | | 30 | | 27636259..27664073 | 309.6540468 | 2.174448832 | 0.018722413 |
| ENSCAFG00000017708 | | 30 | | complement(35836752..35863444) | 65.81016401 | 1.822977056 | 0.00139088 |
| ENSCAFG00000030087 | | 30 | | complement(28835065..28847133) | 19.27988597 | 1.677261956 | 0.003829301 |
| ENSCAFG00000017655 | | 30 | | complement(35713470..35737559) | 554.1272685 | 1.5182161 | 0.02925338 |
| ENSCAFG00000017975 | | 30 | | complement(37944182..37948069) | 7.228569269 | -1.477224269 | 0.047283246 |
| ENSCAFG00000013769 | | 30 | | 11977399..12005386 | 65.48987731 | -3.102552092 | 8.98877E-09 |
| ENSCAFG00000013154 | | 30 | | 10439672..10544510 | 82.1977666 | -3.453941172 | 0 |
| ENSCAFG00000008972 | | 30 | | 7425948..7462665 | 18.17520593 | -4.959292407 | 0 |
| ENSCAFG00000009568 | | 31 | | 30003443..30102944 | 5.362325892 | 6.348564651 | 8.64095E-09 |
| ENSCAFG00000037434 | | 31 | | 39415659..39430895 | 37.49518033 | 2.832063332 | 2.06068E-06 |
| ENSCAFG00000029022 | | 31 | | 39432448..39448160 | 204.9706601 | 2.554388904 | 0.000397991 |
| ENSCAFG00000009086 | | 31 | | 28854753..28876520 | 25.30822967 | 2.05434979 | 9.84932E-05 |
| ENSCAFG00000009065 | | 31 | | 28759607..28790982 | 6.434569406 | 1.536579467 | 0.006931285 |
| ENSCAFG00000031278 | | 31 | | complement(28061050..28098264) | 10.60218043 | -1.157224371 | 0.032407784 |
| ENSCAFG00000009129 | | 31 | | complement(28960364..28996786) | 13.70062538 | -1.507501325 | 0.00196152 |
| ENSCAFG00000008291 | | 31 | | 14044703..14097437 | 14.77854181 | -2.25846266 | 0.006010454 |
| ENSCAFG00000038174 | | 31 | | 32663360..32676037 | 14.95569581 | -9.290770871 | 0 |
| ENSCAFG00000024769 | | 32 | | complement(7065035..7089031) | 64.71316476 | -6.263568502 | 0 |
| ENSCAFG00000010410 | | 32 | | complement(21423405..21437450) | 14.27186699 | -8.615062238 | 0 |
| ENSCAFG00000009117 | | 33 | | 4880853..4966212 | 11.04003445 | -1.464479006 | 0.0049994 |
| ENSCAFG00000012865 | | 33 | | complement(29060925..29089281) | 37.63126618 | -6.290328255 | 0 |
| ENSCAFG00000008984 | | 34 | | 111301..112718 | 19.14360198 | 1.794916741 | 0.000773881 |
| ENSCAFG00000014222 | | 34 | | complement(26330685..26439875) | 5.180445543 | 1.303804658 | 0.013960161 |
| ENSCAFG00000011068 | | 34 | | 12398370..12399773 | 6.140061191 | -1.513028369 | 0.037963785 |
| ENSCAFG00000029800 | | 35 | | 3448032..3451686 | 37.09904872 | 1.515849715 | 0.008714697 |
| ENSCAFG00000009857 | | 35 | | complement(13206746..13221665) | 46.49861294 | -1.292701179 | 0.01823561 |
| ENSCAFG00000033502 | | 35 | | 5212223..5216461 | 5.620149551 | -1.668664762 | 0.023291739 |
| ENSCAFG00000030080 | | 36 | | complement(5535554..5563219) | 17.93809951 | 1.63806603 | 0.001442281 |
| ENSCAFG00000013060 | | 36 | | 16918074..16944386 | 22.21006783 | -1.261552467 | 0.018093887 |
| ENSCAFG00000039936 | | 37 | | complement(24135443..24191301) | 5.27704554 | 3.076432914 | 0.000718333 |
| ENSCAFG00000029635 | | 37 | | 14714290..14717090 | 193.3391254 | -1.571657714 | 0.00778852 |
| ENSCAFG00000014615 | | 37 | | complement(24863946..24865022) | 15.62828231 | -2.177023096 | 0.022497851 |
| ENSCAFG00000032355 | | 37 | | complement(2301905..2302702) | 13.74313386 | -2.694748773 | 7.18752E-05 |
| ENSCAFG00000036759 | | 38 | | 1567216..1576854 | 6.651710318 | 8.358300704 | 0.0183053 |
| ENSCAFG00000013015 | | 38 | | 21054894..21060947 | 63.84569112 | 4.162792086 | 1.67156E-14 |
| ENSCAFG00000013035 | | 38 | | complement(20979963..20994524) | 14.89495302 | 2.600307096 | 4.91593E-05 |
| ENSCAFG00000031225 | | 38 | | complement(21220335..21242660) | 5.538333357 | 1.791742128 | 0.00343815 |
| ENSCAFG00000035312 | | 38 | | 2388626..2407294 | 8.672052101 | -6.442356139 | 0 |
| ENSCAFG00000031355 | | X | | 44845511..44852279 | 12.57006146 | 7.220553637 | 7.72752E-08 |
| ENSCAFG00000017231 | | X | | complement(59085529..59086378) | 30.62323839 | 3.888384804 | 0.000130448 |
| ENSCAFG00000016072 | | X | | 44675132..44682895 | 13.9090449 | 2.666327857 | 0.000273256 |
| ENSCAFG00000019141 | | X | | complement(119204969..119205259) | 277.0573496 | -1.266862717 | 0.016078337 |
| ENSCAFG00000030164 | | X | | complement(82986436..82986741) | 473.8678307 | -1.319491428 | 0.025365105 |
| ENSCAFG00000012234 | | X | | 35702892..35703233 | 123.0443004 | -1.520430058 | 0.003480336 |
| ENSCAFG00000013713 | | X | | 25756996..25833686 | 17.44095908 | -1.833305593 | 0.000542333 |
| ENSCAFG00000015485 | | X | | 41806839..41808876 | 128.9887531 | -2.337384697 | 2.48492E-05 |
| ENSCAFG00000019159 | | X | | 119980051..119980640 | 15.09504116 | -3.174399164 | 0.004468031 |
|  | genes in CFA1 | |
|  | genes in CFA9 | |

FDR, false discovery rate; CFA, *Canis familiaris*.

| **Table SVI. ‘On’ genes among the DEGs in canine oral melanoma.** | | | | |
| --- | --- | --- | --- | --- |
| Name | Chromosome | Max group mean | Log₂ fold change | FDR P-value |
| BGN | X | 750.6354384 | 5.44424503 | 0 |
| CXCL8 | 13 | 718.7157383 | 8.318634019 | 0 |
| PI3 | 24 | 625.5995841 | 8.475895656 | 0 |
| SMPDL3A | 1 | 335.9104413 | 6.23191243 | 0 |
| CCL2 | 9 | 302.6210063 | 6.954792344 | 0 |
| SLC2A3 | 27 | 199.6855496 | 5.598058625 | 0 |
| COL9A2 | 15 | 176.5921335 | 5.412189889 | 0 |
| SAA1_2 | 21 | 174.8578142 | 9.213325616 | 0 |
| SERPINE1 | 6 | 150.3106455 | 6.521012952 | 0 |
| SOX10 | 10 | 145.4978994 | 4.888647866 | 0 |
| SPP1 | 32 | 135.5664837 | 8.621911023 | 0 |
| SEMA7A | 30 | 122.2285749 | 6.330537393 | 0 |
| EDIL3 | 3 | 111.0295024 | 5.883237274 | 0 |
| L1CAM | X | 108.0680806 | 5.476332277 | 0 |
| MATN4 | 24 | 98.99814302 | 7.759292564 | 0 |
| COL11A1 | 6 | 83.54422941 | 11.55017046 | 0 |
| SOCS3 | 9 | 67.11431284 | 5.265940518 | 0 |
| SERPINA1 | 8 | 66.87881825 | 6.24878167 | 0 |
| TNC | 11 | 66.02479843 | 6.664087639 | 0 |
| PLP1 | X | 64.1002786 | 4.445243008 | 0 |
| NES | 7 | 57.12356477 | 4.821129461 | 0 |
| PYCR1 | 9 | 56.5875883 | 4.351680632 | 0 |
| MARCKSL1 | 2 | 55.4823409 | 4.294400236 | 0 |
| CHI3L1 | 7 | 54.53271717 | 7.868381299 | 0 |
| COL2A1 | 27 | 54.10774133 | 10.36199764 | 0 |
| ACAN | 3 | 50.1107608 | 10.46073103 | 0 |
| PLEK | 10 | 46.67881402 | 5.51083778 | 0 |
| COL9A1 | 12 | 41.98627672 | 9.375337519 | 0 |
| COL9A3 | 24 | 41.57551242 | 8.411393341 | 0 |
| IL1B | 17 | 40.81758304 | 9.979670367 | 0 |
| ADAMTS4 | 38 | 36.64656404 | 7.530108375 | 0 |
| IGSF11 | 33 | 36.5180056 | 4.688153859 | 0 |
| ESM1 | 4 | 33.64843512 | 6.654032082 | 0 |
| RGS2 | 38 | 33.45685671 | 4.969950737 | 0 |
| TUBB4A | 20 | 32.984893 | 5.423221335 | 0 |
| TMEM176B | 16 | 31.74275472 | 4.3080645 | 0 |
| UCHL1 | 3 | 31.70497382 | 6.080937609 | 0 |
| SLC35F1 | 1 | 31.27766386 | 5.816710967 | 0 |
| ART3 | 32 | 30.49449802 | 4.143724776 | 0 |
| GEM | 29 | 29.98151751 | 4.530547767 | 0 |
| ST6GALNAC3 | 6 | 29.23087882 | 8.243724801 | 0 |
| RLBP1 | 3 | 28.98452562 | 8.71996617 | 0 |
| FADS1 | 18 | 28.41153634 | 4.564978271 | 0 |
| INSC | 21 | 28.18181586 | 5.310384396 | 0 |
| SORCS1 | 28 | 26.80615162 | 4.813094558 | 0 |
| CHSY1 | 3 | 26.00790821 | 3.498935818 | 0 |
| DUSP4 | 16 | 25.45685187 | 5.007013785 | 0 |
| CCL8 | 9 | 24.72356943 | 6.236176168 | 0 |
| INHBA | 18 | 24.61957437 | 5.735849396 | 0 |
| ADAM12 | 28 | 24.35623078 | 7.876380279 | 0 |
| FFAR2 | 1 | 24.35586759 | 7.672564831 | 0 |
| SLC11A1 | 37 | 24.05122675 | 4.53015279 | 0 |
| CXCR4 | 19 | 22.27558403 | 3.793069705 | 0 |
| SLC16A3 | 9 | 21.76429775 | 4.161894929 | 0 |
| TNIK | 34 | 19.51839693 | 4.792793663 | 0 |
| MBOAT2 | 17 | 18.23938883 | 5.249162506 | 0 |
| GJC1 | 9 | 17.11586399 | 4.385813844 | 0 |
| IGF2BP2 | 34 | 16.76377122 | 4.071408692 | 0 |
| A2M | 27 | 16.57721136 | 4.338114778 | 0 |
| SLC37A2 | 5 | 16.44347492 | 4.403598924 | 0 |
| SCARF2 | 26 | 15.87954748 | 4.477028826 | 0 |
| CSF3R | 15 | 15.83849636 | 5.612821052 | 0 |
| MMP9 | 24 | 15.19461628 | 6.728881362 | 0 |
| C5AR1 | 1 | 14.65109832 | 4.973092761 | 0 |
| FOXD3 | 5 | 14.25774904 | 5.80396222 | 0 |
| TREM2 | 12 | 13.96815761 | 6.088030738 | 0 |
| ADAMTS7 | 3 | 13.81198604 | 4.777863618 | 0 |
| VASH2 | 7 | 13.58460851 | 5.048378371 | 0 |
| RUNX3 | 2 | 13.24629468 | 3.730023224 | 0 |
| FAM178B | 10 | 13.20160425 | 6.023586124 | 0 |
| GDF11 | 10 | 12.30694328 | 4.337278568 | 0 |
| FZD2 | 9 | 12.24540935 | 5.15308087 | 0 |
| MS4A7 | 21 | 11.32327689 | 4.467772962 | 0 |
| DOK5 | 24 | 9.644779425 | 5.120629828 | 0 |
| COL8A2 | 15 | 8.940308919 | 6.70697219 | 0 |
| PDZRN3 | 20 | 8.346289524 | 4.293455462 | 0 |
| SLC2A6 | 9 | 7.656551098 | 4.848285143 | 0 |
| TNFSF9 | 20 | 7.610733382 | 5.475211044 | 0 |
| HCK | 24 | 6.575744695 | 4.471370016 | 0 |
| ADGRE1 | 20 | 5.89952385 | 6.303668571 | 0 |

Genes in chromosome 9 colored red. FDR, false discovery rate.

| **Table SVII. ‘Off’ genes in DEGs in canine oral melanoma.** | | | | |
| --- | --- | --- | --- | --- |
| Name | Chromosome | Max group mean | Log₂ fold change | FDR P-value |
| KRT13 | 9 | 19890.23609 | -11.27810332 | 0 |
| KRT71 | 27 | 7541.688327 | -15.13319019 | 0 |
| S100A8 | 7 | 5616.157022 | -6.39785469 | 0 |
| ARSF | X | 1426.603766 | -12.19831506 | 0 |
| TGM3 | 24 | 1376.03872 | -15.43829609 | 0 |
| AQP3 | 11 | 1324.472821 | -11.7832697 | 0 |
| S100A14 | 7 | 1165.913739 | -9.555767692 | 0 |
| SPRR3 | 17 | 1090.426813 | -13.23899417 | 0 |
| S100A2 | 7 | 1023.838115 | -8.469980831 | 0 |
| SFN | 2 | 769.2134926 | -8.549424168 | 0 |
| RHCG | 3 | 723.8378326 | -12.84073049 | 0 |
| SPINK5 | 2 | 646.388121 | -11.37480897 | 0 |
| S100A16 | 7 | 549.0286762 | -6.490015324 | 0 |
| KRT78 | 27 | 508.5240706 | -11.77812871 | 0 |
| PERP | 1 | 425.0318481 | -8.339934272 | 0 |
| GPX2 | 8 | 421.0816574 | -8.94888878 | 0 |
| TRIM29 | 5 | 399.6917575 | -9.963230323 | 0 |
| JUP | 9 | 392.6518664 | -4.917058359 | 0 |
| MALL | 17 | 368.7054814 | -6.942210838 | 0 |
| HSPA2 | 8 | 359.5941666 | -5.719842035 | 0 |
| HOPX | 13 | 348.4567723 | -8.446232254 | 0 |
| CRNN | 17 | 329.4546465 | -13.23498636 | 0 |
| PPL | 6 | 316.8138888 | -5.925841609 | 0 |
| KRT3 | 27 | 284.9690046 | -11.5287632 | 0 |
| PKP1 | 7 | 264.2402015 | -9.97491112 | 0 |
| LYPD3 | 1 | 253.4635322 | -11.98501 | 0 |
| CESdD1 | 2 | 242.3369351 | -9.074733907 | 0 |
| TGM1 | 8 | 198.4040362 | -8.598541013 | 0 |
| A2ML1 | 27 | 192.0014741 | -11.68778195 | 0 |
| PDZK1IP1 | 15 | 188.871261 | -8.449622852 | 0 |
| EPS8L1 | 1 | 188.6684038 | -9.850882677 | 0 |
| DSG3 | 7 | 181.8460663 | -9.188266586 | 0 |
| CEACAM1 | 1 | 175.1950229 | -5.598487054 | 0 |
| EVPL | 9 | 174.4026625 | -7.83401447 | 0 |
| TUBA4A | 37 | 173.6161404 | -3.660833864 | 0 |
| MAL2 | 13 | 171.869597 | -8.425049634 | 0 |
| DSC2 | 7 | 167.1611035 | -9.046837738 | 0 |
| PDLIM2 | 25 | 163.3938192 | -4.086152736 | 0 |
| DSG1 | 7 | 157.6500116 | -11.14337884 | 0 |
| BARX2 | 5 | 153.2732291 | -8.928156407 | 0 |
| ENDOU | 27 | 146.5467812 | -10.28185326 | 0 |
| KLF5 | 22 | 140.6824284 | -5.235251895 | 0 |
| XDH | 17 | 136.0175304 | -6.284603096 | 0 |
| CST6 | 18 | 132.7387439 | -7.931622359 | 0 |
| NQO2 | 35 | 132.3729592 | -4.249273859 | 0 |
| SERPINB5 | 1 | 131.8707576 | -8.009000575 | 0 |
| PLA2G4E | 30 | 131.7089616 | -11.56597866 | 0 |
| RAB25 | 7 | 119.8805087 | -8.850339947 | 0 |
| TMEM40 | 20 | 119.1956888 | -6.613357439 | 0 |
| C17orf64 | 9 | 118.7326899 | -4.643270197 | 0 |
| LYPD2 | 13 | 117.9723538 | -11.90277481 | 0 |
| TMPRSS11B | 13 | 116.7217861 | -10.92330889 | 0 |
| FAR2 | 27 | 116.2202206 | -4.331541322 | 0 |
| GMDS | 35 | 114.0219233 | -3.408339763 | 0 |
| MPZL2 | 5 | 112.2013084 | -7.85328996 | 0 |
| ZNF185 | X | 111.3300308 | -8.382905376 | 0 |
| CNFN | 1 | 110.6681351 | -11.95449818 | 0 |
| SPINT2 | 1 | 108.9695695 | -4.002896704 | 0 |
| EPS8L2 | 18 | 108.9080551 | -9.136373848 | 0 |
| C6orf132 | 12 | 108.4889688 | -9.944674018 | 0 |
| PROM2 | 17 | 96.99216499 | -9.166619181 | 0 |
| FAM3B | 31 | 88.80701186 | -7.276605709 | 0 |
| NCCRP1 | 1 | 82.22099537 | -9.355733866 | 0 |
| COL17A1 | 28 | 81.8956081 | -6.941030185 | 0 |
| GDPD2 | X | 77.85340637 | -8.802339306 | 0 |
| SDR16C5 | 29 | 76.90958799 | -4.952598006 | 0 |
| EHF | 18 | 74.20591096 | -8.795046291 | 0 |
| FAM84A | 17 | 71.77350126 | -6.674520814 | 0 |
| CLDN7 | 5 | 71.28433678 | -8.835003177 | 0 |
| GDA | 1 | 70.50485567 | -6.832127371 | 0 |
| SCEL | 22 | 69.64286873 | -7.742400007 | 0 |
| HEBP2 | 1 | 69.09456765 | -3.759529488 | 0 |
| PLEKHN1 | 5 | 66.84102914 | -4.443524281 | 0 |
| EPHA1 | 16 | 66.45172064 | -7.946281305 | 0 |
| KLK13 | 1 | 65.02592188 | -10.13612317 | 0 |
| ADH4 | 32 | 63.99430127 | -4.158050237 | 0 |
| ESRP1 | 29 | 63.92067475 | -5.892612427 | 0 |
| AOX4 | 37 | 60.56542979 | -14.72852032 | 0 |
| BNIPL | 17 | 59.66141244 | -7.187272907 | 0 |
| LRAT | 15 | 57.67829118 | -5.723888362 | 0 |
| TMPRSS11D | 13 | 56.92664447 | -9.634077799 | 0 |
| CHST2 | 23 | 55.45352498 | -4.181653073 | 0 |
| CLCA2 | 6 | 54.48585804 | -8.190137593 | 0 |
| KRTDAP | 1 | 54.33789416 | -11.09403133 | 0 |
| ALOX12 | 5 | 54.06128613 | -9.164408556 | 0 |
| CABP7 | 26 | 53.76159879 | -9.567082013 | 0 |
| LAD1 | 7 | 52.65142816 | -6.891889737 | 0 |
| C1orf56 | 17 | 52.63065403 | -6.386077061 | 0 |
| DSC3 | 7 | 51.40139622 | -6.648335402 | 0 |
| TTC22 | 5 | 50.29803546 | -11.1495017 | 0 |
| DUOXA1 | 30 | 50.21815698 | -7.019517562 | 0 |
| ARG1 | 12 | 49.60814265 | -6.277971196 | 0 |
| MBOAT1 | 35 | 49.52901996 | -3.918167764 | 0 |
| KRT23 | 9 | 49.09132421 | -10.393661 | 0 |
| SPTBN2 | 18 | 47.49138337 | -7.366144613 | 0 |
| SYTL1 | 2 | 47.40785241 | -5.728325717 | 0 |
| PLEKHG6 | 27 | 45.85035153 | -6.179629637 | 0 |
| IL20RB | 23 | 45.78583859 | -7.475325507 | 0 |
| GRHL3 | 2 | 45.50188756 | -6.302418543 | 0 |
| RHOV | 30 | 45.30762005 | -7.537606319 | 0 |
| MUC1 | 7 | 44.44088729 | -8.588611826 | 0 |
| CYP2S1 | 1 | 43.98564679 | -6.256130234 | 0 |
| NECTIN4 | 38 | 43.51791614 | -8.500449702 | 0 |
| TP63 | 34 | 42.46840701 | -8.07667911 | 0 |
| HS3ST1 | 3 | 42.33630969 | -4.831068594 | 0 |
| FAM3D | 20 | 42.15501103 | -8.803523301 | 0 |
| CLIC3 | 9 | 42.02216527 | -4.265788985 | 0 |
| GALNT12 | 11 | 41.89259721 | -3.826535249 | 0 |
| SLC5A1 | 26 | 41.68426716 | -8.934676382 | 0 |
| CLIP4 | 17 | 41.60297447 | -5.158483888 | 0 |
| ANKRD35 | 17 | 40.40621862 | -7.443869519 | 0 |
| PKP3 | 18 | 40.07215199 | -6.367002512 | 0 |
| GRHL1 | 17 | 39.79987313 | -4.780505725 | 0 |
| CDSN | 12 | 39.76682735 | -11.85574382 | 0 |
| ESRP2 | 5 | 39.50157807 | -7.693655986 | 0 |
| SOX15 | 5 | 39.47297421 | -9.51471629 | 0 |
| CGN | 17 | 38.80144712 | -7.775395193 | 0 |
| SPINT1 | 30 | 38.580219 | -3.827957932 | 0 |
| IL20RA | 1 | 38.49181689 | -8.348959308 | 0 |
| SMPDL3B | 2 | 38.21618713 | -9.918698068 | 0 |
| SPINK7 | 4 | 38.03730634 | -9.855097766 | 0 |
| TMPRSS11E | 13 | 36.42410118 | -7.352274898 | 0 |
| RIPK4 | 31 | 35.78680706 | -7.856906774 | 0 |
| TMEM54 | 2 | 35.63985487 | -5.580536098 | 0 |
| C6orf15 | 12 | 35.51311619 | -10.76461291 | 0 |
| STAP2 | 20 | 35.02659593 | -6.243554927 | 0 |
| IRF6 | 7 | 34.49076457 | -7.991614378 | 0 |
| HSD17B2 | 5 | 34.03444573 | -9.10628083 | 0 |
| POF1B | X | 33.84606903 | -12.73266555 | 0 |
| CLDN4 | 6 | 33.50129554 | -6.457999422 | 0 |
| PPP1R13L | 1 | 33.37160131 | -4.085268758 | 0 |
| ANKK1 | 5 | 33.27515374 | -9.338431467 | 0 |
| FAM83G | 5 | 32.79341847 | -5.365068721 | 0 |
| ELF5 | 18 | 32.75766934 | -9.374368486 | 0 |
| TMPRSS4 | 5 | 31.46008299 | -9.434065004 | 0 |
| AANAT | 9 | 30.89220658 | -11.21422557 | 0 |
| KYNU | 19 | 30.07507193 | -6.749045979 | 0 |
| EPHX2 | 25 | 29.96399416 | -4.034886823 | 0 |
| TREH | 5 | 29.56405015 | -8.549458864 | 0 |
| CSTA | 33 | 29.54043546 | -10.14908405 | 0 |
| LRMP | 27 | 29.04498102 | -4.779188461 | 0 |
| BICDL2 | 6 | 28.98819319 | -7.82788282 | 0 |
| GDPD3 | 6 | 28.94879417 | -4.347563411 | 0 |
| ATP12A | 25 | 28.65361365 | -11.94139841 | 0 |
| RAB27B | 1 | 28.61134622 | -6.003524089 | 0 |
| TMPRSS11A | 13 | 28.35601638 | -8.104809826 | 0 |
| RDH12 | 8 | 28.3262372 | -7.560892775 | 0 |
| KRT80 | 27 | 27.62915494 | -8.68144252 | 0 |
| GGT6 | 5 | 27.38341327 | -8.535082222 | 0 |
| TMPRSS13 | 5 | 27.28094265 | -9.770239081 | 0 |
| CNKSR1 | 2 | 27.00110021 | -4.281848536 | 0 |
| AP1M2 | 20 | 26.91699275 | -5.356706606 | 0 |
| ALS2CL | 20 | 26.21858236 | -4.206422748 | 0 |
| ZBED2 | 33 | 26.08682324 | -6.297105636 | 0 |
| SH3RF2 | 2 | 26.06971098 | -7.179493255 | 0 |
| IL36RN | 17 | 26.01093733 | -9.341129084 | 0 |
| PDIA2 | 6 | 25.85662469 | -7.110683038 | 0 |
| RUFY4 | 37 | 25.82301633 | -6.689425763 | 0 |
| TMEM45B | 5 | 25.7123222 | -10.13047238 | 0 |
| B3GNT5 | 34 | 25.71219665 | -4.055454124 | 0 |
| C1GALT1 | 14 | 25.55569358 | -3.078975639 | 0 |
| GPR87 | 23 | 25.11729782 | -7.518683088 | 0 |
| CYP2F1 | 1 | 24.91217599 | -10.64725496 | 0 |
| IL36B | 17 | 24.29830764 | -10.1884871 | 0 |
| EXPH5 | 5 | 24.04954658 | -7.422051039 | 0 |
| ARHGEF37 | 4 | 23.90091682 | -4.101988366 | 0 |
| GRHL2 | 13 | 22.95302906 | -7.090051723 | 0 |
| NKPD1 | 1 | 22.63283821 | -8.452922601 | 0 |
| GSDMC | 13 | 22.60636832 | -9.603398397 | 0 |
| DUOXA2 | 30 | 22.27003137 | -7.920336383 | 0 |
| SLC23A1 | 2 | 21.20754115 | -8.789255736 | 0 |
| NUAK2 | 38 | 20.87615921 | -4.534815198 | 0 |
| TMEM184A | 6 | 20.28052305 | -6.865285987 | 0 |
| MUC13 | 33 | 19.58598328 | -7.564317637 | 0 |
| CDC42BPG | 18 | 19.29081546 | -4.858554731 | 0 |
| ST14 | 5 | 18.81560139 | -5.234973033 | 0 |
| FAM83F | 10 | 17.64987761 | -8.156806194 | 0 |
| TNK1 | 5 | 17.1922582 | -6.714137634 | 0 |
| GRTP1 | 22 | 17.16713588 | -6.089605064 | 0 |
| CHST4 | 5 | 16.38817655 | -6.030041784 | 0 |
| TPRG1 | 34 | 16.24330446 | -9.144849835 | 0 |
| CA13 | 29 | 16.06240131 | -4.572811377 | 0 |
| CYP4F22 | 20 | 16.00054878 | -8.448566843 | 0 |
| ENPP3 | 12 | 15.73591122 | -6.955233073 | 0 |
| VSIG8 | 38 | 15.4742638 | -8.595329762 | 0 |
| SULT2B1 | 1 | 15.38530237 | -11.06719657 | 0 |
| GRB7 | 9 | 14.78124309 | -7.210497176 | 0 |
| PERM1 | 5 | 14.56814103 | -4.328570776 | 0 |
| PINLYP | 1 | 14.43747612 | -8.900605552 | 0 |
| UOX | 6 | 14.12314725 | -9.99558118 | 0 |
| EPCAM | 10 | 14.02221204 | -5.9102022 | 0 |
| SLC16A14 | 25 | 13.98914226 | -5.833867393 | 0 |
| CRYBG2 | 2 | 13.71330124 | -9.316434578 | 0 |
| RERG | 27 | 13.46529789 | -4.210980897 | 0 |
| CERS3 | 3 | 13.37680942 | -6.390784606 | 0 |
| B3GNT3 | 20 | 13.06437493 | -9.677046242 | 0 |
| MAP3K9 | 8 | 12.9655026 | -5.213603812 | 0 |
| TFCP2L1 | 19 | 12.78063181 | -6.855905113 | 0 |
| SH3YL1 | 17 | 12.30152916 | -8.164356369 | 0 |
| CBD103 | 16 | 12.14940309 | -6.623107681 | 0 |
| KLK10 | 1 | 12.04110114 | -11.29032103 | 0 |
| VSIG10L | 1 | 11.72203298 | -4.021121331 | 0 |
| NIPAL4 | 4 | 11.36823391 | -5.636521888 | 0 |
| FAM83B | 12 | 11.35691949 | -6.902951987 | 0 |
| TSPAN1 | 15 | 11.23532252 | -7.626618447 | 0 |
| KRT24 | 9 | 10.9282437 | -7.795783141 | 0 |
| LAMB4 | 18 | 10.76789625 | -7.738614171 | 0 |
| KLC3 | 1 | 10.21558535 | -4.983898262 | 0 |
| FAT2 | 4 | 10.10026093 | -7.059346028 | 0 |
| PLB1 | 17 | 10.03151038 | -6.820846713 | 0 |
| KRT76 | 27 | 10.00303904 | -7.781596414 | 0 |
| RASAL1 | 26 | 9.914484962 | -5.231825243 | 0 |
| GCNT3 | 30 | 9.64100525 | -8.821882395 | 0 |
| OTX1 | 10 | 9.400832053 | -7.139509013 | 0 |
| EPN3 | 9 | 9.340281336 | -6.719854591 | 0 |
| PPFIA3 | 1 | 9.307617618 | -4.786054379 | 0 |
| HAL | 15 | 9.052170666 | -9.167994737 | 0 |
| URAD | 25 | 8.662519843 | -9.477314423 | 0 |
| PLCH2 | 5 | 8.556582898 | -7.22832828 | 0 |
| WNT7B | 10 | 8.282207381 | -6.459758306 | 0 |
| RHBG | 7 | 8.252745845 | -4.975324328 | 0 |
| TMEM229A | 14 | 8.074741564 | -6.99224761 | 0 |
| PATJ | 5 | 7.964707289 | -5.054861007 | 0 |
| ATP2C2 | 5 | 7.856871558 | -5.28363047 | 0 |
| TGM5 | 30 | 7.828857404 | -8.385477976 | 0 |
| DUOX2 | 30 | 7.47593459 | -8.551717179 | 0 |
| CASZ1 | 2 | 7.327772011 | -4.909469545 | 0 |
| SLC52A3 | 24 | 7.094603109 | -6.983622534 | 0 |
| SLC5A9 | 15 | 7.019467879 | -10.90095694 | 0 |
| OCLN | 2 | 6.800594627 | -5.707425329 | 0 |
| FRRS1 | 6 | 6.47276621 | -4.522727843 | 0 |
| RASEF | 1 | 6.345978805 | -7.734390047 | 0 |
| CARD14 | 9 | 6.160800999 | -9.618344576 | 0 |
| STRA8 | 16 | 5.998313291 | -9.447989179 | 0 |
| BAIAP3 | 6 | 5.615411704 | -4.978535361 | 0 |
| CNDP1 | 1 | 5.595804245 | -7.640356862 | 0 |
| ADGRF4 | 12 | 5.516455443 | -7.474817855 | 0 |
| SLC22A18 | 18 | 5.439037365 | -6.232460287 | 0 |
| PRSS8 | 6 | 5.383872336 | -8.192263369 | 0 |
| SLC19A3 | 25 | 5.214792847 | -8.886948941 | 0 |
| RNF39 | 35 | 5.14620547 | -8.393614658 | 0 |

Genes in the chromosome 1 are colored in green. FDR, false discovery rate.

| **Table SVIII. ‘On’ genes among novel genes in canine oral melanoma.** | | | | |
| --- | --- | --- | --- | --- |
| Name | Chromosome | Max group mean | Log₂ fold change | FDR P-value |
| ENSCAFG00000031806 | 26 | 645.936 | 7.03304 | 0 |
| ENSCAFG00000030258 | 8 | 585.378 | 7.09342 | 0 |
| ENSCAFG00000031786 | 26 | 497.546 | 7.498 | 0 |
| ENSCAFG00000015206 | 21 | 476.174 | 7.80284 | 0 |
| ENSCAFG00000029553 | 21 | 235.756 | 7.37543 | 0 |
| ENSCAFG00000029996 | 8 | 184.86 | 7.34354 | 0 |
| ENSCAFG00000024720 | 26 | 165.963 | 7.83843 | 0 |
| ENSCAFG00000031753 | 17 | 111.686 | 6.81204 | 0 |
| ENSCAFG00000031869 | 9 | 95.1818 | 6.07674 | 0 |
| ENSCAFG00000032078 | 26 | 87.1774 | 7.62148 | 0 |
| ENSCAFG00000031653 | 26 | 50.6109 | 6.98765 | 0 |
| ENSCAFG00000011504 | 17 | 21.5893 | 6.43507 | 0 |
| ENSCAFG00000028453 | 1 | 7.09185 | 5.11375 | 0 |

FDR, false discovery rate.

| **Table SIX. ‘Off’ genes among novel genes in canine oral melanoma.** | | | | |
| --- | --- | --- | --- | --- |
| Name | Chromosome | Max group mean | Log₂ fold change | FDR P-value |
| ENSCAFG00000023728 | 17 | 6965.18 | -13.073 | 0 |
| ENSCAFG00000000471 | 12 | 502.643 | -14.742 | 0 |
| ENSCAFG00000032259 | 9 | 298.06 | -8.6278 | 0 |
| ENSCAFG00000030805 | 9 | 226.852 | -13.831 | 0 |
| ENSCAFG00000020241 | 6 | 183.961 | -9.9042 | 0 |
| ENSCAFG00000031147 | 7 | 132.736 | -9.0524 | 0 |
| ENSCAFG00000032430 | 13 | 121.616 | -9.4585 | 0 |
| ENSCAFG00000023230 | 6 | 110.028 | -9.7552 | 0 |
| ENSCAFG00000024271 | 12 | 100.093 | -5.1691 | 0 |
| ENSCAFG00000028993 | 1 | 93.0558 | -6.8596 | 0 |
| ENSCAFG00000013154 | 30 | 82.1978 | -3.4539 | 0 |
| ENSCAFG00000030632 | 8 | 69.6231 | -5.5709 | 0 |
| ENSCAFG00000024769 | 32 | 64.7132 | -6.2636 | 0 |
| ENSCAFG00000013653 | 6 | 60.04 | -9.6089 | 0 |
| ENSCAFG00000031912 | 1 | 58.0193 | -7.4036 | 0 |
| ENSCAFG00000012865 | 33 | 37.6313 | -6.2903 | 0 |
| ENSCAFG00000032290 | 9 | 29.0564 | -6.6042 | 0 |
| ENSCAFG00000024733 | 2 | 25.4898 | -6.6364 | 0 |
| ENSCAFG00000003894 | 2 | 24.0398 | -5.1651 | 0 |
| ENSCAFG00000030158 | 25 | 21.3534 | -11.673 | 0 |
| ENSCAFG00000011523 | 7 | 21.3442 | -6.2579 | 0 |
| ENSCAFG00000040421 | 12 | 20.7662 | -9.3404 | 0 |
| ENSCAFG00000008972 | 30 | 18.1752 | -4.9593 | 0 |
| ENSCAFG00000019353 | 6 | 17.8242 | -8.6233 | 0 |
| ENSCAFG00000003221 | 16 | 17.0085 | -8.8528 | 0 |
| ENSCAFG00000038174 | 31 | 14.9557 | -9.2908 | 0 |
| ENSCAFG00000010410 | 32 | 14.2719 | -8.6151 | 0 |
| ENSCAFG00000029234 | 17 | 13.6322 | -11.392 | 0 |
| ENSCAFG00000019080 | 7 | 11.7149 | -4.9974 | 0 |
| ENSCAFG00000014154 | 26 | 11.2337 | -3.6785 | 0 |
| ENSCAFG00000031824 | 1 | 10.2165 | -8.4379 | 0 |
| ENSCAFG00000035312 | 38 | 8.67205 | -6.4424 | 0 |
| ENSCAFG00000037999 | 19 | 6.75691 | -8.773 | 0 |
| ENSCAFG00000031160 | 25 | 6.14586 | -10.296 | 0 |
| ENSCAFG00000033670 | 12 | 5.11432 | -8.5749 | 0 |

FDR, false discovery rate.

| **Table SX**. **Common significant altered genes between human tissue and dog melanoma.** | | | | | |
| --- | --- | --- | --- | --- | --- |
| Dog gene stable ID | Human gene stable ID | Dog Melanoma log 2 Fc | Dog FDR | Human Melanoma log 2 Fc | Human FDR |
| ENSCAFG00000000825 | ENSG00000164756 | 13.66170873 | 1.5926E-06 | 4.459554924 | 0.03428041 |
| ENSCAFG00000015205 | ENSG00000173432 | 11.74117065 | 7.84408E-05 | 6.147727722 | 0.00157717 |
| ENSCAFG00000006046 | ENSG00000172752 | 11.30527806 | 9.18602E-11 | 9.41918403 | 0.00587466 |
| ENSCAFG00000016261 | ENSG00000108342 | 11.15093384 | 0.0001688 | 9.609872266 | 0.0086954 |
| ENSCAFG00000002733 | ENSG00000136244 | 10.85176402 | 3.55745E-12 | 3.788697646 | 0.00556518 |
| ENSCAFG00000012468 | ENSG00000099985 | 10.59564191 | 4.29127E-12 | 10.82463593 | 0.00024812 |
| ENSCAFG00000011534 | ENSG00000157766 | 10.46073103 | 0 | 4.198731292 | 0.00192905 |
| ENSCAFG00000009059 | ENSG00000139219 | 10.36199764 | 0 | 7.425295016 | 4.1488E-05 |
| ENSCAFG00000007249 | ENSG00000125538 | 9.979670367 | 0 | 11.02338884 | 2.9511E-09 |
| ENSCAFG00000002589 | ENSG00000112280 | 9.375337519 | 0 | 9.198644655 | 2.4217E-08 |
| ENSCAFG00000007857 | ENSG00000164106 | 8.958358135 | 6.3546E-13 | 6.473725518 | 4.0019E-05 |
| ENSCAFG00000024869 | ENSG00000134028 | 8.727751785 | 7.17728E-11 | 7.676526056 | 9.1173E-08 |
| ENSCAFG00000011594 | ENSG00000140522 | 8.71996617 | 0 | 9.837370269 | 1.0418E-08 |
| ENSCAFG00000008098 | ENSG00000162951 | 8.665469907 | 1.19868E-08 | 6.619735882 | 0.00989361 |
| ENSCAFG00000018167 | ENSG00000276085 | 8.502667479 | 8.58513E-11 | 4.48072169 | 0.00057821 |
| ENSCAFG00000009641 | ENSG00000124102 | 8.475895656 | 0 | 8.192261677 | 0.02738951 |
| ENSCAFG00000029131 | ENSG00000145681 | 8.346780459 | 4.65093E-12 | 10.61655662 | 0.00120718 |
| ENSCAFG00000003029 | ENSG00000169429 | 8.318634019 | 0 | 3.706461398 | 0.00413279 |
| ENSCAFG00000020226 | ENSG00000106689 | 8.238777511 | 2.34187E-10 | 6.627972322 | 1.8307E-05 |
| ENSCAFG00000010274 | ENSG00000133048 | 7.868381299 | 0 | 13.83377853 | 6.3346E-07 |
| ENSCAFG00000000996 | ENSG00000164434 | 7.572979393 | 4.52574E-06 | 6.134566056 | 3.4132E-07 |
| ENSCAFG00000012836 | ENSG00000158859 | 7.530108375 | 0 | 2.752009475 | 0.00157546 |
| ENSCAFG00000016556 | ENSG00000103569 | 7.391862967 | 3.24283E-11 | 10.83309455 | 0.0002606 |
| ENSCAFG00000002900 | ENSG00000167755 | 7.112246969 | 0.000514508 | 10.45871674 | 0.00323872 |
| ENSCAFG00000018349 | ENSG00000108691 | 6.954792344 | 0 | 2.306089365 | 0.0239865 |
| ENSCAFG00000001591 | ENSG00000124731 | 6.844925637 | 3.22992E-14 | 10.83820532 | 0.00018916 |
| ENSCAFG00000009905 | ENSG00000100985 | 6.728881362 | 0 | 11.93250094 | 9.3957E-14 |
| ENSCAFG00000032454 | ENSG00000171812 | 6.70697219 | 0 | 5.662216247 | 1.1894E-09 |
| ENSCAFG00000003426 | ENSG00000041982 | 6.664087639 | 0 | 6.729562011 | 0 |
| ENSCAFG00000018381 | ENSG00000164283 | 6.654032082 | 0 | 9.406534727 | 4.8386E-09 |
| ENSCAFG00000020088 | ENSG00000148346 | 6.617216123 | 2.46133E-14 | 9.71734774 | 0.00380569 |
| ENSCAFG00000002098 | ENSG00000119147 | 6.605345391 | 4.42646E-07 | 5.621370782 | 0.02037107 |
| ENSCAFG00000015489 | ENSG00000104112 | 6.604196598 | 8.66135E-15 | 4.003889396 | 0.01336165 |
| ENSCAFG00000013909 | ENSG00000106366 | 6.521012952 | 0 | 4.92927017 | 2.8336E-09 |
| ENSCAFG00000017916 | ENSG00000138623 | 6.330537393 | 0 | 2.992890698 | 0.00011845 |
| ENSCAFG00000018571 | ENSG00000174837 | 6.303668571 | 0 | 8.160354367 | 0.01228855 |
| ENSCAFG00000017646 | ENSG00000197249 | 6.24878167 | 0 | 9.506991191 | 0 |
| ENSCAFG00000023928 | ENSG00000108700 | 6.236176168 | 0 | 5.382428881 | 7.1416E-06 |
| ENSCAFG00000016447 | ENSG00000073754 | 6.185791191 | 1.04014E-05 | 8.817470156 | 0.01087637 |
| ENSCAFG00000015930 | ENSG00000148604 | 6.181624451 | 2.29073E-08 | 5.846512837 | 0.0056642 |
| ENSCAFG00000012377 | ENSG00000139155 | 6.147237321 | 9.33167E-14 | 5.624144301 | 0.00068119 |
| ENSCAFG00000001586 | ENSG00000095970 | 6.088030738 | 0 | 9.760579576 | 2.4772E-09 |
| ENSCAFG00000003864 | ENSG00000258227 | 5.990992707 | 2.39868E-08 | 9.610251646 | 0.00130189 |
| ENSCAFG00000015444 | ENSG00000104093 | 5.932965801 | 1.15392E-13 | -1.628960849 | 0.03878286 |
| ENSCAFG00000011613 | ENSG00000166091 | 5.910890614 | 4.61846E-06 | 3.392050653 | 0.03108454 |
| ENSCAFG00000000903 | ENSG00000204248 | 5.910073502 | 2.59492E-12 | 5.290882101 | 5.946E-09 |
| ENSCAFG00000000287 | ENSG00000111012 | 5.901939515 | 2.67474E-10 | 3.187583413 | 0.00722856 |
| ENSCAFG00000023401 | ENSG00000186529 | 5.897719048 | 1.87875E-13 | 4.856025116 | 0.01225235 |
| ENSCAFG00000008467 | ENSG00000164176 | 5.883237274 | 0 | 8.324334456 | 6.1381E-12 |
| ENSCAFG00000000932 | ENSG00000196376 | 5.816710967 | 0 | 3.507766839 | 0.02669178 |
| ENSCAFG00000003550 | ENSG00000122641 | 5.735849396 | 0 | 4.797973347 | 2.4285E-05 |
| ENSCAFG00000003376 | ENSG00000119535 | 5.612821052 | 0 | 9.098831351 | 0 |
| ENSCAFG00000010848 | ENSG00000172020 | 5.596981892 | 1.17052E-05 | 10.71512168 | 0.0015449 |
| ENSCAFG00000003260 | ENSG00000115956 | 5.51083778 | 0 | 11.67786323 | 0 |
| ENSCAFG00000023615 | ENSG00000262406 | 5.503857052 | 8.66135E-15 | 8.560084047 | 7.1422E-08 |
| ENSCAFG00000007199 | ENSG00000170421 | 5.493985916 | 1.39026E-05 | 7.066810373 | 0 |
| ENSCAFG00000019362 | ENSG00000198910 | 5.476332277 | 0 | -3.137559788 | 0.02024597 |
| ENSCAFG00000019189 | ENSG00000182492 | 5.44424503 | 0 | 8.213993221 | 0 |
| ENSCAFG00000017527 | ENSG00000102359 | 5.442926881 | 1.30496E-13 | 5.378181958 | 6.9622E-08 |
| ENSCAFG00000002997 | ENSG00000049089 | 5.412189889 | 0 | 3.978939021 | 5.1426E-05 |
| ENSCAFG00000001450 | ENSG00000106484 | 5.391154902 | 1.55558E-12 | 7.49611828 | 4.1731E-10 |
| ENSCAFG00000008565 | ENSG00000188487 | 5.310384396 | 0 | 6.686918207 | 8.526E-05 |
| ENSCAFG00000005306 | ENSG00000184557 | 5.265940518 | 0 | 5.852970103 | 0 |
| ENSCAFG00000028626 | ENSG00000124107 | 5.249657769 | 4.57847E-07 | 11.66481698 | 0.00031938 |
| ENSCAFG00000008582 | ENSG00000038427 | 5.147466675 | 1.64521E-12 | 9.372504176 | 0 |
| ENSCAFG00000023317 | ENSG00000158050 | 5.13315964 | 2.88241E-13 | 4.458540533 | 6.9528E-06 |
| ENSCAFG00000002202 | ENSG00000109265 | 5.111395034 | 6.77265E-08 | -2.238356936 | 0.00335347 |
| ENSCAFG00000018164 | ENSG00000275302 | 5.062568088 | 1.71433E-11 | 7.808260385 | 2.7226E-10 |
| ENSCAFG00000018164 | ENSG00000276070 | 5.062568088 | 1.71433E-11 | 7.865777656 | 1.1542E-07 |
| ENSCAFG00000006073 | ENSG00000133110 | 5.040198689 | 5.34357E-10 | 12.48449489 | 0 |
| ENSCAFG00000008353 | ENSG00000145423 | 5.029292453 | 1.28547E-06 | 9.424523034 | 6.3555E-14 |
| ENSCAFG00000004175 | ENSG00000197405 | 4.973092761 | 0 | 8.935294117 | 0 |
| ENSCAFG00000010595 | ENSG00000116741 | 4.969950737 | 0 | 1.890471042 | 0.02324243 |
| ENSCAFG00000016228 | ENSG00000135919 | 4.942488022 | 3.92374E-12 | 2.06411843 | 0.04446362 |
| ENSCAFG00000013252 | ENSG00000157064 | 4.888630211 | 8.37033E-06 | 8.998996929 | 0.00633198 |
| ENSCAFG00000004615 | ENSG00000130208 | 4.837255243 | 2.66953E-08 | 7.493789045 | 3.2735E-14 |
| ENSCAFG00000008704 | ENSG00000137801 | 4.831192339 | 1.67156E-14 | 4.542673159 | 4.2041E-08 |
| ENSCAFG00000011041 | ENSG00000198223 | 4.76038619 | 2.02461E-11 | 6.60032513 | 3.4545E-11 |
| ENSCAFG00000019714 | ENSG00000142583 | 4.72594337 | 8.66135E-15 | 6.463705121 | 3.832E-13 |
| ENSCAFG00000015177 | ENSG00000188404 | 4.629959577 | 4.76952E-14 | 12.53639508 | 6.2694E-06 |
| ENSCAFG00000002657 | ENSG00000167614 | 4.601493733 | 1.98998E-08 | 7.192024662 | 9.0142E-09 |
| ENSCAFG00000000873 | ENSG00000138944 | 4.577419114 | 9.84493E-12 | 3.695558936 | 0.00704934 |
| ENSCAFG00000010603 | ENSG00000090104 | 4.559895153 | 2.23571E-13 | 2.638045278 | 0.02825973 |
| ENSCAFG00000030271 | ENSG00000215218 | 4.541174003 | 2.44458E-10 | 3.879707664 | 0.04054454 |
| ENSCAFG00000014645 | ENSG00000018280 | 4.53015279 | 0 | 5.341775704 | 1.2839E-08 |
| ENSCAFG00000030931 | ENSG00000128342 | 4.494866542 | 9.67453E-12 | 6.236791774 | 1.6698E-10 |
| ENSCAFG00000010617 | ENSG00000184254 | 4.49381883 | 7.54621E-08 | 3.897646883 | 0.00169682 |
| ENSCAFG00000007122 | ENSG00000101336 | 4.471370016 | 0 | 9.669007506 | 0 |
| ENSCAFG00000010370 | ENSG00000166927 | 4.467772962 | 0 | 5.872326039 | 0 |
| ENSCAFG00000012619 | ENSG00000008394 | 4.451535928 | 8.66135E-15 | 3.090464853 | 0.00269187 |
| ENSCAFG00000000957 | ENSG00000172164 | 4.411977938 | 9.56756E-10 | 4.458068719 | 6.3555E-14 |
| ENSCAFG00000013156 | ENSG00000114646 | 4.38570382 | 4.16967E-13 | 4.287843 | 5.3236E-05 |
| ENSCAFG00000009385 | ENSG00000175264 | 4.382483453 | 8.66135E-15 | 4.833205153 | 9.9999E-06 |
| ENSCAFG00000005906 | ENSG00000183010 | 4.351680632 | 0 | 4.130802213 | 3.317E-11 |
| ENSCAFG00000005560 | ENSG00000125848 | 4.315997828 | 2.02056E-13 | 4.625656556 | 9.1955E-06 |
| ENSCAFG00000004585 | ENSG00000106565 | 4.3080645 | 0 | 9.773064936 | 0 |
| ENSCAFG00000014687 | ENSG00000105696 | 4.280564666 | 1.34081E-08 | 7.56161548 | 0.00041425 |
| ENSCAFG00000014879 | ENSG00000175489 | 4.27104667 | 3.53298E-13 | 8.357305621 | 3.9769E-12 |
| ENSCAFG00000005913 | ENSG00000185269 | 4.247689469 | 1.42889E-07 | 3.992798978 | 0.03061011 |
| ENSCAFG00000008584 | ENSG00000169245 | 4.208737176 | 5.65343E-05 | 5.717114808 | 2.3199E-08 |
| ENSCAFG00000017160 | ENSG00000103742 | 4.193349923 | 8.66135E-15 | 2.385158122 | 0.04314079 |
| ENSCAFG00000008589 | ENSG00000156219 | 4.143724776 | 0 | 6.165059952 | 1.6406E-05 |
| ENSCAFG00000006248 | ENSG00000134121 | 4.138690745 | 1.54744E-10 | 2.888493325 | 0.01440931 |
| ENSCAFG00000017484 | ENSG00000055163 | 4.082743317 | 1.39434E-09 | 3.552394305 | 8.4249E-06 |
| ENSCAFG00000006920 | ENSG00000115041 | 4.0587531 | 3.16793E-06 | -2.788967278 | 0.00765646 |
| ENSCAFG00000006250 | ENSG00000187678 | 4.050791831 | 6.03211E-07 | 2.970702277 | 0.0004174 |
| ENSCAFG00000008404 | ENSG00000120885 | 4.039318414 | 3.25216E-07 | 7.293798091 | 1.2941E-11 |
| ENSCAFG00000009254 | ENSG00000136542 | 4.038594244 | 6.48113E-06 | 5.019124002 | 2.2111E-05 |
| ENSCAFG00000017877 | ENSG00000137868 | 4.025105147 | 8.04115E-06 | 10.3736687 | 1.2408E-13 |
| ENSCAFG00000031675 | ENSG00000144810 | 3.987943038 | 5.1431E-08 | 4.950121048 | 4.1416E-08 |
| ENSCAFG00000017153 | ENSG00000125931 | 3.976199417 | 1.58157E-06 | -3.799211244 | 7.2984E-05 |
| ENSCAFG00000011499 | ENSG00000124216 | 3.966482969 | 8.29278E-13 | 6.445684415 | 6.1568E-09 |
| ENSCAFG00000024205 | ENSG00000181374 | 3.941174565 | 0.001899411 | 6.852504262 | 0.00028291 |
| ENSCAFG00000010431 | ENSG00000007402 | 3.94025303 | 4.06472E-11 | 5.320070428 | 0.0002579 |
| ENSCAFG00000011395 | ENSG00000158517 | 3.874008305 | 1.12414E-08 | 8.482762505 | 1.2332E-12 |
| ENSCAFG00000002077 | ENSG00000107159 | 3.870138636 | 2.80472E-07 | 8.532231489 | 0.01083412 |
| ENSCAFG00000030105 | ENSG00000137033 | 3.849651348 | 1.25483E-09 | 5.590128959 | 3.0775E-07 |
| ENSCAFG00000000273 | ENSG00000135439 | 3.84021628 | 1.83944E-08 | 2.971369085 | 0.00801384 |
| ENSCAFG00000013940 | ENSG00000166523 | 3.835109835 | 9.58115E-06 | 6.878385978 | 0.00022287 |
| ENSCAFG00000013844 | ENSG00000149294 | 3.830769777 | 2.96462E-06 | 3.515019099 | 0.0062625 |
| ENSCAFG00000001084 | ENSG00000145824 | 3.824572317 | 6.89832E-05 | 8.323840023 | 8.8927E-07 |
| ENSCAFG00000003023 | ENSG00000106069 | 3.814076978 | 4.02831E-14 | 2.283725146 | 0.04564119 |
| ENSCAFG00000015043 | ENSG00000137745 | 3.801700125 | 7.55556E-06 | 8.489161603 | 0.01496411 |
| ENSCAFG00000004662 | ENSG00000138080 | 3.798962457 | 3.43262E-11 | 2.333584182 | 0.0018323 |
| ENSCAFG00000005109 | ENSG00000121966 | 3.793069705 | 0 | 13.85899466 | 1.403E-07 |
| ENSCAFG00000002364 | ENSG00000150471 | 3.788088684 | 2.38921E-12 | 8.495307383 | 1.9745E-05 |
| ENSCAFG00000013440 | ENSG00000151651 | 3.781363965 | 4.68773E-12 | 3.135369581 | 0.00097709 |
| ENSCAFG00000004443 | ENSG00000125740 | 3.775983832 | 0.000303027 | 5.570173964 | 1.647E-06 |
| ENSCAFG00000009104 | ENSG00000159167 | 3.768490492 | 1.00655E-13 | -2.443091226 | 0.03729847 |
| ENSCAFG00000006830 | ENSG00000038945 | 3.762422322 | 2.05624E-09 | 9.860229199 | 0 |
| ENSCAFG00000008358 | ENSG00000115318 | 3.751549612 | 9.19657E-12 | 3.229393679 | 0.00106413 |
| ENSCAFG00000006608 | ENSG00000088882 | 3.75001407 | 5.23331E-06 | 10.98119675 | 4.399E-12 |
| ENSCAFG00000011039 | ENSG00000160255 | 3.745866643 | 1.67614E-12 | 9.263890526 | 0 |
| ENSCAFG00000006745 | ENSG00000275342 | 3.741802875 | 8.44988E-12 | 4.023246533 | 9.9978E-07 |
| ENSCAFG00000006200 | ENSG00000136040 | 3.741687776 | 2.91359E-11 | -2.672319727 | 0.03284092 |
| ENSCAFG00000031409 | ENSG00000002933 | 3.716053316 | 1.67156E-14 | 12.59020363 | 2.4E-06 |
| ENSCAFG00000018451 | ENSG00000108551 | 3.711108982 | 0.000229674 | 4.379814035 | 0.00038717 |
| ENSCAFG00000015169 | ENSG00000007908 | 3.705611604 | 0.005165426 | 9.581299006 | 0.00246896 |
| ENSCAFG00000013336 | ENSG00000143171 | 3.699961533 | 6.92464E-06 | 3.205870843 | 0.00154598 |
| ENSCAFG00000011346 | ENSG00000143127 | 3.696716774 | 2.01685E-07 | 7.218284168 | 5.9472E-09 |
| ENSCAFG00000029442 | ENSG00000118523 | 3.690682747 | 1.94439E-12 | 5.346376836 | 2.5315E-11 |
| ENSCAFG00000014972 | ENSG00000108784 | 3.66406701 | 3.97453E-11 | -1.658843814 | 0.03405496 |
| ENSCAFG00000013049 | ENSG00000122877 | 3.653847365 | 2.92115E-08 | 2.648133309 | 0.0451421 |
| ENSCAFG00000028568 | ENSG00000132465 | 3.646885147 | 4.25261E-07 | 10.6008076 | 0 |
| ENSCAFG00000004656 | ENSG00000077943 | 3.644527488 | 0.000394829 | 7.478329628 | 2.2684E-07 |
| ENSCAFG00000012226 | ENSG00000163359 | 3.618594769 | 6.25628E-08 | 7.411725459 | 0 |
| ENSCAFG00000005386 | ENSG00000149257 | 3.603217621 | 2.52296E-09 | 1.941733908 | 0.00586 |
| ENSCAFG00000032344 | ENSG00000173369 | 3.58462842 | 1.20606E-08 | 8.798518498 | 0 |
| ENSCAFG00000017709 | ENSG00000165959 | 3.546040834 | 1.26111E-08 | 3.214703453 | 2.7477E-07 |
| ENSCAFG00000030815 | ENSG00000113248 | 3.541407742 | 8.04826E-10 | 3.102806052 | 0.03013243 |
| ENSCAFG00000008351 | ENSG00000137462 | 3.515486748 | 7.02743E-12 | 5.28082499 | 0 |
| ENSCAFG00000010172 | ENSG00000157601 | 3.502697533 | 5.49462E-07 | -3.279846317 | 0.00041788 |
| ENSCAFG00000004723 | ENSG00000104783 | 3.480847324 | 2.35796E-12 | 6.364848839 | 1.6724E-07 |
| ENSCAFG00000015190 | ENSG00000122861 | 3.454851216 | 1.34081E-08 | 7.107131817 | 0 |
| ENSCAFG00000014639 | ENSG00000159189 | 3.454777342 | 4.19065E-08 | 11.8577479 | 0 |
| ENSCAFG00000019848 | ENSG00000130635 | 3.444949899 | 2.34658E-06 | 8.081715423 | 0 |
| ENSCAFG00000011745 | ENSG00000137642 | 3.412557652 | 1.46558E-10 | 9.781717154 | 0 |
| ENSCAFG00000016010 | ENSG00000075618 | 3.404420822 | 3.99028E-08 | 3.313547895 | 0.0003675 |
| ENSCAFG00000007893 | ENSG00000138207 | 3.387386094 | 1.92041E-07 | 6.198027817 | 0.00208704 |
| ENSCAFG00000008902 | ENSG00000163661 | 3.375293159 | 1.56154E-06 | 3.11992066 | 0.01506005 |
| ENSCAFG00000017357 | ENSG00000135074 | 3.370665677 | 4.38234E-06 | 2.911454652 | 0.00023573 |
| ENSCAFG00000024888 | ENSG00000086205 | 3.368918319 | 3.43415E-07 | 5.713210694 | 1.8119E-06 |
| ENSCAFG00000011751 | ENSG00000114013 | 3.368395654 | 2.00077E-12 | 11.63788599 | 1.8579E-05 |
| ENSCAFG00000000074 | ENSG00000123342 | 3.349278791 | 2.64116E-11 | 5.699821658 | 2.1288E-09 |
| ENSCAFG00000015360 | ENSG00000186417 | 3.343282723 | 9.14572E-09 | 8.766166688 | 0.00735619 |
| ENSCAFG00000001911 | ENSG00000136010 | 3.315946091 | 6.28947E-14 | -2.221145391 | 0.02651975 |
| ENSCAFG00000013922 | ENSG00000172379 | 3.310242389 | 7.17782E-11 | 1.677470651 | 0.01100033 |
| ENSCAFG00000025069 | ENSG00000151834 | 3.30175045 | 0.01012166 | 7.188981249 | 0.00256384 |
| ENSCAFG00000032120 | ENSG00000133466 | 3.300392574 | 3.07323E-05 | 1.592446955 | 0.0499419 |
| ENSCAFG00000000656 | ENSG00000164932 | 3.283878177 | 3.69432E-10 | 6.305531074 | 0 |
| ENSCAFG00000004492 | ENSG00000144596 | 3.274934151 | 0.000135218 | 7.60009261 | 8.2957E-06 |
| ENSCAFG00000008901 | ENSG00000101425 | 3.272530323 | 4.53476E-08 | 7.990503369 | 0.03732165 |
| ENSCAFG00000014345 | ENSG00000115414 | 3.253707329 | 1.64575E-05 | 2.279210336 | 0.03768514 |
| ENSCAFG00000004840 | ENSG00000163083 | 3.222711317 | 9.61346E-05 | 5.303242713 | 1.9383E-06 |
| ENSCAFG00000018540 | ENSG00000142347 | 3.214017252 | 1.0554E-09 | 5.694283069 | 3.2735E-14 |
| ENSCAFG00000009259 | ENSG00000120057 | 3.20087733 | 0.018942062 | 9.724517594 | 0.00535911 |
| ENSCAFG00000018493 | ENSG00000167775 | 3.198272122 | 9.60386E-08 | 1.834933513 | 0.02731651 |
| ENSCAFG00000010930 | ENSG00000084636 | 3.193443856 | 5.55835E-08 | 3.352479694 | 2.6358E-06 |
| ENSCAFG00000008723 | ENSG00000066336 | 3.176256456 | 3.04432E-09 | 8.341926646 | 0 |
| ENSCAFG00000006697 | ENSG00000011600 | 3.161221238 | 8.33019E-11 | 13.36918825 | 3.0074E-07 |
| ENSCAFG00000012294 | ENSG00000146674 | 3.160978332 | 2.17843E-07 | 6.359570742 | 1.6394E-11 |
| ENSCAFG00000009637 | ENSG00000168481 | 3.127861732 | 0.000183808 | -3.477415205 | 0.02503058 |
| ENSCAFG00000015233 | ENSG00000007062 | 3.126688673 | 1.35209E-06 | 4.536178085 | 0.0058027 |
| ENSCAFG00000003369 | ENSG00000105894 | 3.116350548 | 0.00116754 | 7.375318565 | 4.3543E-06 |
| ENSCAFG00000009491 | ENSG00000124785 | 3.106012624 | 6.44682E-06 | 7.96168792 | 0 |
| ENSCAFG00000016961 | ENSG00000043462 | 3.105346664 | 4.09379E-08 | 9.950449529 | 0 |
| ENSCAFG00000012878 | ENSG00000158869 | 3.101867572 | 6.6723E-08 | 8.522457219 | 0 |
| ENSCAFG00000030320 | ENSG00000180730 | 3.096110652 | 7.51303E-06 | 9.084430913 | 1.3313E-11 |
| ENSCAFG00000032227 | ENSG00000130558 | 3.093114576 | 0.000382212 | -4.079939305 | 8.4444E-05 |
| ENSCAFG00000014013 | ENSG00000144791 | 3.08705964 | 1.35258E-08 | 2.278002066 | 0.01869979 |
| ENSCAFG00000024758 | ENSG00000154736 | 3.076715743 | 2.23121E-05 | 7.466481016 | 9.7339E-08 |
| ENSCAFG00000019676 | ENSG00000116285 | 3.070821936 | 7.93086E-07 | 3.441829857 | 2.6648E-05 |
| ENSCAFG00000031290 | ENSG00000173372 | 3.050694661 | 3.78675E-07 | 12.97293765 | 0 |
| ENSCAFG00000011542 | ENSG00000140511 | 3.030584057 | 6.85784E-10 | 2.305430889 | 0.01128825 |
| ENSCAFG00000013314 | ENSG00000116701 | 3.02898681 | 1.70425E-07 | 9.577625548 | 3.2735E-14 |
| ENSCAFG00000004491 | ENSG00000136167 | 3.025299092 | 2.1452E-08 | 6.116504764 | 0 |
| ENSCAFG00000001354 | ENSG00000120215 | 3.00830455 | 0.00093195 | -2.684614729 | 0.02251507 |
| ENSCAFG00000010948 | ENSG00000124126 | 3.007309141 | 7.07812E-11 | 5.494465563 | 0 |
| ENSCAFG00000011487 | ENSG00000060982 | 3.002435288 | 4.59499E-10 | 5.781997026 | 3.2735E-14 |
| ENSCAFG00000018625 | ENSG00000125730 | 3.000830724 | 0.005801521 | 6.334969269 | 2.9673E-07 |
| ENSCAFG00000000594 | ENSG00000173926 | 2.993617826 | 8.94003E-09 | 2.26760145 | 0.04968031 |
| ENSCAFG00000011383 | ENSG00000174600 | 2.987798018 | 7.7082E-05 | 9.053877161 | 0 |
| ENSCAFG00000015457 | ENSG00000110900 | 2.98645579 | 9.66216E-06 | 2.971523349 | 0.00772162 |
| ENSCAFG00000019379 | ENSG00000167972 | 2.981875423 | 1.47387E-08 | 5.017695647 | 1.742E-05 |
| ENSCAFG00000006713 | ENSG00000105290 | 2.974813019 | 7.66368E-08 | 3.16349931 | 0.03204105 |
| ENSCAFG00000017712 | ENSG00000140749 | 2.959774778 | 4.13414E-05 | 4.443606069 | 1.1546E-08 |
| ENSCAFG00000017455 | ENSG00000007237 | 2.957303387 | 6.63722E-08 | 1.692955545 | 0.04180609 |
| ENSCAFG00000006496 | ENSG00000187098 | 2.953879371 | 1.77738E-06 | -2.108912017 | 0.03443359 |
| ENSCAFG00000018877 | ENSG00000113389 | 2.93761934 | 0.000484215 | 7.650470077 | 8.7194E-05 |
| ENSCAFG00000000239 | ENSG00000171408 | 2.919032754 | 6.11751E-05 | 3.96858621 | 0.00305844 |
| ENSCAFG00000003996 | ENSG00000138685 | 2.907964818 | 0.000808043 | 3.921722892 | 2.9627E-05 |
| ENSCAFG00000013783 | ENSG00000160791 | 2.900736369 | 0.00018057 | 11.26318347 | 5.8381E-05 |
| ENSCAFG00000001133 | ENSG00000104415 | 2.849255887 | 0.000623553 | 3.944020165 | 1.0428E-06 |
| ENSCAFG00000017482 | ENSG00000137809 | 2.833619011 | 7.56239E-07 | 3.605116969 | 0.00079107 |
| ENSCAFG00000030416 | ENSG00000143333 | 2.827830515 | 1.85507E-05 | 4.254103605 | 2.9673E-07 |
| ENSCAFG00000017123 | ENSG00000103710 | 2.825705842 | 0.000929332 | 6.157141295 | 4.1489E-09 |
| ENSCAFG00000016623 | ENSG00000155659 | 2.822592197 | 2.66706E-06 | 11.07387779 | 0 |
| ENSCAFG00000025202 | ENSG00000104267 | 2.819194579 | 0.001024085 | 6.513249892 | 1.7479E-07 |
| ENSCAFG00000006479 | ENSG00000162878 | 2.810143989 | 1.57628E-05 | 2.527878951 | 0.0081925 |
| ENSCAFG00000003621 | ENSG00000134324 | 2.802056409 | 7.9465E-05 | -1.475900706 | 0.01679069 |
| ENSCAFG00000012093 | ENSG00000143387 | 2.783007582 | 1.2458E-05 | -2.278781972 | 0.03920052 |
| ENSCAFG00000010505 | ENSG00000115009 | 2.767949919 | 0.039021581 | 3.755178342 | 0.01222565 |
| ENSCAFG00000013968 | ENSG00000177575 | 2.764430365 | 1.31373E-05 | 11.55951163 | 0 |
| ENSCAFG00000015717 | ENSG00000138135 | 2.753994993 | 1.531E-05 | 3.211923454 | 0.03831165 |
| ENSCAFG00000018623 | ENSG00000185862 | 2.748695767 | 1.11276E-06 | 2.513569356 | 0.0413784 |
| ENSCAFG00000000958 | ENSG00000152661 | 2.74412738 | 4.1066E-07 | 6.781520307 | 0 |
| ENSCAFG00000017018 | ENSG00000108821 | 2.743369912 | 0.007512479 | 8.123550791 | 0 |
| ENSCAFG00000002947 | ENSG00000146250 | 2.738436173 | 0.00026088 | 4.256562282 | 0.0135349 |
| ENSCAFG00000009258 | ENSG00000115165 | 2.734950685 | 4.12936E-05 | 7.42705565 | 4.2221E-11 |
| ENSCAFG00000011727 | ENSG00000271605 | 2.73183491 | 4.61846E-06 | 8.706384703 | 9.6105E-08 |
| ENSCAFG00000014322 | ENSG00000106333 | 2.729574198 | 0.000386565 | 4.269180236 | 5.1493E-08 |
| ENSCAFG00000009994 | ENSG00000101017 | 2.722930177 | 0.000119794 | 3.698117604 | 1.3821E-05 |
| ENSCAFG00000017144 | ENSG00000071246 | 2.722230027 | 1.54097E-08 | 1.627384544 | 0.03562176 |
| ENSCAFG00000004329 | ENSG00000077420 | 2.690038862 | 2.24104E-07 | 9.983855968 | 2.4939E-10 |
| ENSCAFG00000008341 | ENSG00000262655 | 2.684623984 | 1.29661E-05 | 8.31950204 | 0 |
| ENSCAFG00000018666 | ENSG00000164318 | 2.682613615 | 0.000349412 | 8.709772932 | 2.6027E-09 |
| ENSCAFG00000010511 | ENSG00000135114 | 2.681747306 | 0.000688427 | -2.98179171 | 0.00775702 |
| ENSCAFG00000013933 | ENSG00000165168 | 2.681140458 | 2.90305E-06 | 11.61277359 | 0 |
| ENSCAFG00000005243 | ENSG00000137507 | 2.678797806 | 5.63074E-05 | 7.841306889 | 0 |
| ENSCAFG00000003646 | ENSG00000106483 | 2.65479509 | 0.029820767 | 7.164482199 | 1.5812E-07 |
| ENSCAFG00000003620 | ENSG00000142552 | 2.646939906 | 1.99866E-06 | 3.710921853 | 6.6906E-05 |
| ENSCAFG00000020152 | ENSG00000157368 | 2.646064582 | 0.000369121 | 3.614528067 | 0.00715671 |
| ENSCAFG00000010982 | ENSG00000108950 | 2.641046188 | 0.000104542 | 6.130429668 | 2.0948E-12 |
| ENSCAFG00000032529 | ENSG00000103187 | 2.635994686 | 9.84662E-07 | 1.937742875 | 0.02417648 |
| ENSCAFG00000009809 | ENSG00000112137 | 2.628583186 | 7.41725E-08 | -2.333297764 | 0.00245436 |
| ENSCAFG00000003415 | ENSG00000115758 | 2.625295333 | 6.13728E-08 | 2.893559039 | 9.8157E-05 |
| ENSCAFG00000016422 | ENSG00000028137 | 2.624678085 | 3.1934E-07 | 3.937118523 | 4.6679E-09 |
| ENSCAFG00000015800 | ENSG00000197535 | 2.606772406 | 0.001653232 | -2.438512481 | 0.00448447 |
| ENSCAFG00000016995 | ENSG00000119630 | 2.601847195 | 1.07305E-05 | 4.236235092 | 4.0964E-07 |
| ENSCAFG00000009324 | ENSG00000138131 | 2.593844062 | 0.001728772 | 8.05953897 | 0 |
| ENSCAFG00000005768 | ENSG00000165457 | 2.59147302 | 1.48538E-05 | 11.93141537 | 1.0761E-05 |
| ENSCAFG00000007673 | ENSG00000137573 | 2.589097202 | 1.65694E-05 | 10.45391691 | 0 |
| ENSCAFG00000012003 | ENSG00000086730 | 2.55665707 | 0.000183815 | 4.580132655 | 4.5756E-08 |
| ENSCAFG00000003824 | ENSG00000135596 | 2.555067275 | 5.74189E-10 | -2.545117711 | 0.01027229 |
| ENSCAFG00000014965 | ENSG00000131979 | 2.551424944 | 0.001551903 | 2.195773035 | 0.03258382 |
| ENSCAFG00000002020 | ENSG00000001561 | 2.551176922 | 5.29282E-07 | 7.042629165 | 9.7637E-11 |
| ENSCAFG00000000814 | ENSG00000179344 | 2.548731411 | 0.000243734 | 9.939957491 | 0 |
| ENSCAFG00000012119 | ENSG00000065534 | 2.539294464 | 6.4129E-05 | 1.98593339 | 0.0252822 |
| ENSCAFG00000018466 | ENSG00000184060 | 2.537305977 | 3.21074E-06 | 8.371277393 | 0 |
| ENSCAFG00000009450 | ENSG00000159388 | 2.532189789 | 0.00046496 | 3.330503043 | 0.00019788 |
| ENSCAFG00000007649 | ENSG00000197629 | 2.529632748 | 6.0283E-06 | 9.520471387 | 0 |
| ENSCAFG00000019451 | ENSG00000007350 | 2.517187848 | 0.000480568 | 5.63158081 | 0.00113877 |
| ENSCAFG00000018857 | ENSG00000076716 | 2.51081436 | 6.91321E-06 | 4.145561242 | 3.1425E-05 |
| ENSCAFG00000004043 | ENSG00000112769 | 2.508362558 | 3.79459E-05 | 2.600476651 | 0.0003214 |
| ENSCAFG00000014117 | ENSG00000099953 | 2.506748933 | 6.92464E-06 | 2.291441248 | 0.00954822 |
| ENSCAFG00000019014 | ENSG00000167680 | 2.506101396 | 9.04992E-05 | 6.40746655 | 2.0769E-10 |
| ENSCAFG00000017040 | ENSG00000170345 | 2.49620453 | 0.001570854 | 2.776308518 | 0.00081733 |
| ENSCAFG00000008511 | ENSG00000122986 | 2.490768003 | 1.07856E-06 | 2.811829853 | 0.00589961 |
| ENSCAFG00000013965 | ENSG00000188467 | 2.478425072 | 0.011396973 | -2.415878914 | 0.02764377 |
| ENSCAFG00000002595 | ENSG00000180061 | 2.469633002 | 0.003388864 | 6.842184768 | 0.00020365 |
| ENSCAFG00000001898 | ENSG00000058091 | 2.469567068 | 1.14592E-05 | 4.58526486 | 3.1351E-07 |
| ENSCAFG00000020172 | ENSG00000196814 | 2.466059334 | 9.20894E-07 | 3.443601146 | 5.5419E-09 |
| ENSCAFG00000008898 | ENSG00000138669 | 2.463694978 | 0.001277113 | 7.140607268 | 8.1903E-08 |
| ENSCAFG00000023107 | ENSG00000111335 | 2.451077791 | 6.14397E-07 | -2.97132821 | 0.0008422 |
| ENSCAFG00000006138 | ENSG00000139329 | 2.447702418 | 0.000516384 | 9.955823125 | 0 |
| ENSCAFG00000006424 | ENSG00000172986 | 2.444337168 | 1.2259E-05 | 2.532651843 | 0.00758353 |
| ENSCAFG00000012086 | ENSG00000163131 | 2.433413296 | 0.000163272 | 2.995393094 | 0.00025342 |
| ENSCAFG00000032508 | ENSG00000206538 | 2.43262865 | 0.006213519 | 5.354260503 | 1.017E-08 |
| ENSCAFG00000028621 | ENSG00000185585 | 2.430396185 | 0.025974092 | 3.425897472 | 0.00023938 |
| ENSCAFG00000016883 | ENSG00000140678 | 2.419606151 | 8.81354E-05 | 3.923388901 | 8.0694E-07 |
| ENSCAFG00000005527 | ENSG00000149380 | 2.41690044 | 0.000115962 | 3.50048234 | 0.00810806 |
| ENSCAFG00000002525 | ENSG00000204291 | 2.413419414 | 0.000143195 | 8.087811573 | 0 |
| ENSCAFG00000011193 | ENSG00000197461 | 2.406386891 | 0.00071762 | 2.999548121 | 0.00476458 |
| ENSCAFG00000019772 | ENSG00000143119 | 2.405975895 | 3.58182E-05 | 12.0046803 | 0 |
| ENSCAFG00000002021 | ENSG00000112796 | 2.405044524 | 5.75555E-05 | 3.264616738 | 0.02453221 |
| ENSCAFG00000016952 | ENSG00000185905 | 2.399589284 | 0.00870237 | 7.443713041 | 4.0847E-06 |
| ENSCAFG00000009214 | ENSG00000057019 | 2.397557402 | 9.29429E-07 | -1.883268366 | 0.02227186 |
| ENSCAFG00000014076 | ENSG00000103811 | 2.374310152 | 7.4774E-06 | 2.513849033 | 0.00278283 |
| ENSCAFG00000016363 | ENSG00000162493 | 2.366674516 | 7.13075E-05 | 9.402331173 | 1.761E-08 |
| ENSCAFG00000004555 | ENSG00000106538 | 2.35617996 | 5.76486E-08 | 7.058327741 | 0 |
| ENSCAFG00000020425 | ENSG00000140937 | 2.351091994 | 3.6436E-05 | 5.338906488 | 6.6391E-11 |
| ENSCAFG00000014175 | ENSG00000115232 | 2.340236794 | 1.53146E-05 | 3.212565625 | 0.00068557 |
| ENSCAFG00000020276 | ENSG00000142871 | 2.321685214 | 9.24723E-05 | 4.969855867 | 7.369E-09 |
| ENSCAFG00000012391 | ENSG00000172572 | 2.313836737 | 9.29942E-06 | 3.326789317 | 0.0010546 |
| ENSCAFG00000013269 | ENSG00000117318 | 2.31005544 | 0.002707679 | 3.468182471 | 8.5527E-05 |
| ENSCAFG00000002169 | ENSG00000165030 | 2.307714266 | 5.25769E-06 | -2.074365723 | 0.00095475 |
| ENSCAFG00000003709 | ENSG00000104894 | 2.305353329 | 0.000486272 | 5.674770751 | 1.359E-10 |
| ENSCAFG00000007778 | ENSG00000110934 | 2.301571242 | 6.32908E-05 | 7.163423427 | 1.5437E-13 |
| ENSCAFG00000011650 | ENSG00000168918 | 2.282305302 | 5.99935E-08 | 8.960459814 | 0 |
| ENSCAFG00000018230 | ENSG00000123496 | 2.270654896 | 0.00670375 | 10.54319332 | 1.3411E-09 |
| ENSCAFG00000018101 | ENSG00000019582 | 2.267968839 | 0.001807738 | 11.29046353 | 0 |
| ENSCAFG00000004496 | ENSG00000260314 | 2.256079793 | 0.000100839 | 8.390351325 | 0 |
| ENSCAFG00000000804 | ENSG00000077942 | 2.252791445 | 0.002465373 | 3.09059684 | 0.00014859 |
| ENSCAFG00000016825 | ENSG00000174705 | 2.246118479 | 6.93359E-07 | -2.001471174 | 0.00785739 |
| ENSCAFG00000009187 | ENSG00000134013 | 2.244643986 | 0.000397334 | 3.307457038 | 6.3535E-07 |
| ENSCAFG00000017110 | ENSG00000102879 | 2.236940728 | 7.0258E-06 | 6.729154519 | 0 |
| ENSCAFG00000000200 | ENSG00000185633 | 2.232877374 | 0.014790212 | 4.467591562 | 3.7734E-06 |
| ENSCAFG00000009913 | ENSG00000121281 | 2.224389093 | 8.95402E-05 | 2.657929135 | 0.00340576 |
| ENSCAFG00000016405 | ENSG00000006118 | 2.21723215 | 2.80272E-05 | 3.162412107 | 0.00083496 |
| ENSCAFG00000014484 | ENSG00000175832 | 2.215112098 | 0.009164663 | 2.783794174 | 0.01184205 |
| ENSCAFG00000025390 | ENSG00000092096 | 2.208469645 | 1.44067E-07 | 2.306220703 | 0.01906295 |
| ENSCAFG00000011247 | ENSG00000162511 | 2.193108479 | 6.87657E-05 | 10.76894347 | 0 |
| ENSCAFG00000012844 | ENSG00000110324 | 2.18004072 | 0.00012787 | 10.48844827 | 0 |
| ENSCAFG00000009216 | ENSG00000135111 | 2.179407587 | 0.016399999 | 2.544684348 | 0.01087785 |
| ENSCAFG00000009773 | ENSG00000111859 | 2.173657358 | 5.13952E-05 | 2.656751626 | 8.1751E-06 |
| ENSCAFG00000014290 | ENSG00000154122 | 2.167774985 | 0.008464066 | 2.90519713 | 0.02753044 |
| ENSCAFG00000000803 | ENSG00000204287 | 2.163491036 | 0.003334447 | 11.61797939 | 0 |
| ENSCAFG00000006413 | ENSG00000123338 | 2.158688904 | 7.15985E-05 | 9.636322224 | 0 |
| ENSCAFG00000018590 | ENSG00000141968 | 2.158310869 | 1.63861E-05 | 7.163069422 | 8.557E-13 |
| ENSCAFG00000019194 | ENSG00000167703 | 2.15296664 | 6.17467E-05 | 3.295613778 | 0.00035559 |
| ENSCAFG00000006100 | ENSG00000139318 | 2.151963671 | 4.74175E-05 | 2.693761301 | 0.00331398 |
| ENSCAFG00000000848 | ENSG00000204257 | 2.147381748 | 0.000320246 | 3.265248485 | 5.0429E-05 |
| ENSCAFG00000008997 | ENSG00000145569 | 2.146267923 | 0.002476334 | 10.65164721 | 0.00017174 |
| ENSCAFG00000011317 | ENSG00000110876 | 2.143141463 | 0.000371848 | 5.678784127 | 3.747E-12 |
| ENSCAFG00000014817 | ENSG00000105655 | 2.140709982 | 9.71475E-05 | 2.061459108 | 0.04632551 |
| ENSCAFG00000001506 | ENSG00000100055 | 2.132608872 | 2.09882E-05 | 10.74603102 | 5.0982E-13 |
| ENSCAFG00000030211 | ENSG00000124145 | 2.130119799 | 0.000829451 | 2.052158162 | 0.01075606 |
| ENSCAFG00000016071 | ENSG00000141753 | 2.126906845 | 0.003349601 | 2.042195597 | 0.01224201 |
| ENSCAFG00000001938 | ENSG00000112715 | 2.122546889 | 0.000407342 | 3.714252105 | 6.3138E-09 |
| ENSCAFG00000015916 | ENSG00000069974 | 2.120360313 | 0.001047469 | -2.426300079 | 0.00554588 |
| ENSCAFG00000001077 | ENSG00000173334 | 2.108368096 | 9.46116E-05 | 2.625291953 | 1.3472E-05 |
| ENSCAFG00000007010 | ENSG00000107551 | 2.101393961 | 0.000656397 | 3.21727559 | 6.7913E-06 |
| ENSCAFG00000002037 | ENSG00000146070 | 2.100222657 | 0.000179443 | 9.325257491 | 8.101E-09 |
| ENSCAFG00000023910 | ENSG00000129038 | 2.099075347 | 2.65114E-06 | 4.525470868 | 1.8365E-06 |
| ENSCAFG00000012001 | ENSG00000188042 | 2.099020443 | 3.03281E-05 | -2.103646787 | 0.00802312 |
| ENSCAFG00000032422 | ENSG00000118849 | 2.095191761 | 0.000519217 | 5.266465494 | 1.8246E-08 |
| ENSCAFG00000014956 | ENSG00000216490 | 2.082469886 | 0.00050084 | 5.293690977 | 2.9427E-10 |
| ENSCAFG00000013196 | ENSG00000136404 | 2.06548644 | 0.001569581 | 5.824580656 | 6.99E-07 |
| ENSCAFG00000009582 | ENSG00000239264 | 2.061952337 | 0.000335162 | 1.769145788 | 0.02326608 |
| ENSCAFG00000005564 | ENSG00000175567 | 2.061314459 | 0.00021407 | 6.446594797 | 0 |
| ENSCAFG00000016138 | ENSG00000162458 | 2.059048204 | 5.44624E-05 | 2.240577691 | 0.0023584 |
| ENSCAFG00000011265 | ENSG00000081237 | 2.056113337 | 0.000217587 | 10.8713196 | 0 |
| ENSCAFG00000018703 | ENSG00000122122 | 2.046081533 | 0.000237639 | 10.08873529 | 0 |
| ENSCAFG00000025436 | ENSG00000171860 | 2.039504745 | 0.008176498 | 5.924483471 | 8.039E-13 |
| ENSCAFG00000011038 | ENSG00000070540 | 2.033960464 | 3.99997E-06 | -1.946469067 | 0.00525984 |
| ENSCAFG00000010995 | ENSG00000100600 | 2.028307004 | 0.001508101 | 1.748025746 | 0.04485257 |
| ENSCAFG00000008395 | ENSG00000168077 | 2.027808474 | 0.001185673 | 4.411913887 | 6.4931E-05 |
[truncated: 384,360 more chars]
